# Supplementary material for: Consecutive β,β′‐Selective C(sp3)−H Silylation of Tertiary Amines with Dihydrosilanes Catalyzed by B(C6F5)3
Source: PubMed Central journal article supplement (PMC8048813; doi:10.1002/anie.202016664), 2021-03-03
Supplement: ANIE-60-8542-s001.pdf [file ANIE-60-8542-s001.pdf]

Supporting Information

**Consecutive  $\beta, \beta'$ -Selective  $C(sp^3)$ -H Silylation of Tertiary Amines with Dihydrosilanes Catalyzed by  $B(C_6F_5)_3$**

*Huaquan Fang, Kaixue Xie, Sebastian Kemper, and Martin Oestreich\**

anie\_202016664\_sm\_miscellaneous\_information.pdf

## Supporting Information

### Table of Contents

|          |                                                                                        |             |
|----------|----------------------------------------------------------------------------------------|-------------|
| <b>1</b> | <b>General Experimental Information .....</b>                                          | <b>S3</b>   |
| <b>2</b> | <b>Experimental Details for the Preparation of <i>N,N</i>-Dialkyl Benzylamines ...</b> | <b>S5</b>   |
| 2.1      | General Procedure for the Preparation of <i>N,N</i> -Dialkyl Benzylamines .....        | S5          |
| 2.2      | Characterization Data of the <i>N,N</i> -Dialkyl Benzylamines .....                    | S6          |
| <b>3</b> | <b>Experiment Details for the Two-Fold C(sp<sup>3</sup>)-H Silylation .....</b>        | <b>S7</b>   |
| 3.1      | General Procedure for the Two-Fold C(sp <sup>3</sup> )-H Silylation .....              | S7          |
| 3.2      | Characterization Data of the 4-Silapiperidines .....                                   | S8          |
| 3.3      | Unsuccessful Substrates .....                                                          | S23         |
| <b>4</b> | <b>Scale-Up Experiment .....</b>                                                       | <b>S24</b>  |
| <b>5</b> | <b>Elaboration of an <i>N</i>-Benzylated 4-Silapiperidine .....</b>                    | <b>S25</b>  |
| 5.1      | Debenzylation of Product <b>3aa</b> .....                                              | S25         |
| 5.2      | Oxidation of Product <b>3aa</b> .....                                                  | S25         |
| <b>6</b> | <b>Mechanistic Investigations .....</b>                                                | <b>S27</b>  |
| 6.1      | <sup>2</sup> H-Labeling Experiments .....                                              | S27         |
| 6.2      | Stoichiometric Experiments .....                                                       | S30         |
| <b>7</b> | <b>NMR Spectra .....</b>                                                               | <b>S31</b>  |
| <b>8</b> | <b>References .....</b>                                                                | <b>S139</b> |

## 1 General Experimental Information

### Reagents and Solvents

Toluene, benzene, chlorobenzene, chlorobenzene, and *p*-xylene were purified by distillation over LiAlH<sub>4</sub> and freshly distilled prior to use. CH<sub>2</sub>Cl<sub>2</sub> was dried over CaH<sub>2</sub> and freshly distilled prior to use. B(C<sub>6</sub>F<sub>5</sub>)<sub>3</sub> was purchased from Boulder Scientific Company, sublimed under vacuum at 130 °C prior to use, and stored in a nitrogen-filled glovebox. Di-*p*-tolylsilane (**2b**),<sup>[1]</sup> bis(4-(*tert*-butyl)phenyl)silane (**2c**),<sup>[2]</sup> bis(4-fluorophenyl)silane (**2d**),<sup>[2]</sup> 2,3-dihydro-1*H*-benzo[*b*]silole (**2g**),<sup>[3]</sup> and dimesitylsilane (**2k**)<sup>[4]</sup> were prepared according to literature procedures. Ph<sub>2</sub>SiD<sub>2</sub><sup>[5]</sup> was prepared according to literature procedures. All other reagents were purchased from commercial sources and used as received unless specified otherwise.

### Reactions

All manipulations were carried out in a nitrogen-filled glovebox or under an atmosphere of dry nitrogen using standard Schlenk techniques, unless otherwise stated.

### Chromatography

Analytical thin layer chromatography (TLC) was performed on silica gel 60 F254 glass plates by *Merck*. Flash column chromatography was performed on silica gel 60 (40–63 μm, 230–400 mesh, ASTM) by *Grace* using the indicated solvents.

### Nuclear Magnetic Resonance (NMR) Spectroscopy

<sup>1</sup>H, <sup>13</sup>C, and <sup>19</sup>F NMR spectra were recorded in CDCl<sub>3</sub> on Bruker AV500 instruments. Chemical shifts are reported in parts per million (ppm) and are referenced to the residual solvent resonance as the internal standard (CHCl<sub>3</sub>: δ = 7.26 ppm for <sup>1</sup>H NMR and CDCl<sub>3</sub>: δ = 77.16 ppm for <sup>13</sup>C NMR; toluene: δ = 7.09, 7.01, 6.97, 2.08 ppm for <sup>1</sup>H NMR). Data are reported as follows: chemical shift, multiplicity (br = broad signal, s = singlet, d = doublet, t = triplet, q = quartet, m = multiplet), coupling constants (Hz), and integration.

### Gas Chromatography (GC)

Gas chromatography (GC) was performed on an *Agilent Technologies 7820A* gas chromatograph equipped with a HP-5 capillary column (30 m × 0.32 mm, 0.25 μm film

thickness) by *Agilent Technologies/ CS-Chromatographie Service* using the following program: nitrogen carrier gas, injection temperature 250 °C, detector temperature 300 °C, flow rate: 1.7 mL/min; temperature program: start temperature 40 °C, heating rate 10 °C/min, end temperature 280 °C for 10 min.

### **Gas Chromatography–Mass Spectrometry (GC-MS)**

Gas chromatography–mass spectrometry (GC-MS) was performed on an *Agilent Technologies 5975C* gas chromatograph equipped with an *Agilent Technologies HP-5* column (30 m × 0.32 mm, 0.25 µm film thickness) using the following program: nitrogen carrier gas, injection temperature 280 °C, detector temperature 280 °C, flow rate: 0.8 mL/min; temperature program: start temperature 40 °C, heating rate 10 °C/min, end temperature 280 °C for 10 min.

### **Infrared Spectroscopy**

Infrared (IR) spectra were recorded on an *Agilent Technologies Cary 630 FT-IR* spectrometer equipped with an ATR unit or a *Jasco FT/IR-4100* spectrometer, and the bands are reported in wavenumbers (cm<sup>-1</sup>).

### **Mass Spectrometry**

High resolution mass spectrometry (HRMS) analysis was performed by the Analytical Facility at the *Institut für Chemie, Technische Universität Berlin*.

### **Compound Nomenclature**

The compound names were generated by the computer program *ChemDraw* according to the guidelines specified by the *International Union of Pure and Applied Chemistry (IUPAC)*.

## 2 Experimental Details for the Preparation of *N,N*-Dialkyl Benzylamines

### 2.1 General Procedure for the Preparation of *N,N*-Dialkyl Benzylamines

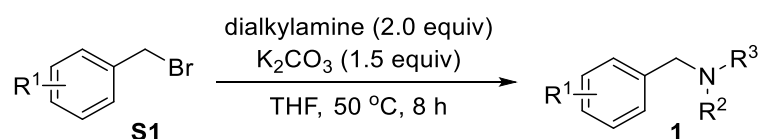

A mixture of benzyl bromides **S1** (10.0 mmol), dialkylamine (20.0 mmol),  $K_2CO_3$  (15.0 mmol) in THF (30 mL) was heated at 50 °C for 8 h. The mixture was cooled to room temperature and diluted with methyl *tert*-butyl ether (20 mL) and  $H_2O$  (20 mL). Then the mixture was extracted with methyl *tert*-butyl ether (10 mL $\times$ 3). The combined organic layers were washed with brine (15 mL), dried over  $Na_2SO_4$  and the solvent was removed under reduced pressure. The residue was purified by flash column chromatography on silica gel with methyl *tert*-butyl ether / cyclohexane to afford *N,N*-dialkyl benzylamines as a colorless liquid.

*N,N*-Dialkyl Benzylamines **1a**, **1o–q**, **1t**, and **1u** were purchased from commercial sources and used as received unless specified otherwise.

*N,N*-Dialkyl Benzylamines **1b**,<sup>[6]</sup> **1c**,<sup>[7]</sup> **1d–e**,<sup>[8]</sup> **1f**,<sup>[6]</sup> **1g**,<sup>[8]</sup> **1h**,<sup>[6]</sup> **1i–j**,<sup>[8]</sup> **1k**,<sup>[7]</sup> **1l**,<sup>[6]</sup> **1m**,<sup>[7]</sup> **1n**,<sup>[6]</sup> and **1v**<sup>[9]</sup> were prepared according to the general procedure and data were consistent with that reported.

## 2.2 Characterization Data of New *N,N*-Dialkyl Benzylamines

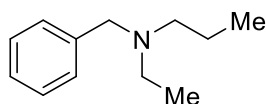

***N*-Benzyl-*N*-ethylpropan-1-amine (1r).** The general procedure was followed with benzyl bromide (1.19 mL, 10.0 mmol), *N*-ethylpropan-1-amine (2.42 mL, 20.0 mmol),  $K_2CO_3$  (2.10 g, 15.0 mmol) in THF (30 mL) at 50 °C for 8 h. The residue was purified by flash column chromatography on silica gel with methyl *tert*-butyl ether / cyclohexane = 1 : 10 as the eluent to afford **1r** as a colorless liquid (1.60 g, 90% yield).  **$^1H$  NMR** (500 MHz,  $CDCl_3$ ):  $\delta$  7.36 – 7.30 (m, 4H), 7.24 (t,  $J$  = 7.0 Hz, 1H), 3.58 (s, 2H), 2.52 (q,  $J$  = 7.2 Hz, 2H), 2.41 (t,  $J$  = 7.4 Hz, 2H), 1.54 – 1.47 (m, 2H), 1.05 (t,  $J$  = 7.2 Hz, 3H), 0.89 (t,  $J$  = 7.4 Hz, 3H) ppm.  **$^{13}C$  NMR** (125 MHz,  $CDCl_3$ ):  $\delta$  140.3, 129.0, 128.2, 126.7, 58.2, 55.4, 47.4, 20.3, 12.0, 11.9 ppm. **HRMS** (APCI): Calculated for  $C_{12}H_{20}N^+$   $[M+H]^+$ : 178.1596; Found: 178.1586. **IR** (ATR):  $\tilde{\nu}$  2961, 2931, 2871, 2794, 1492, 1452, 1368, 1193, 1163, 1073, 1026, 727, 696.

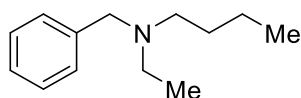

***N*-Benzyl-*N*-ethylbutan-1-amine (1s).** The general procedure was followed with benzyl bromide (1.19 mL, 10.0 mmol), *N*-ethylbutan-1-amine (2.73 mL, 20.0 mmol),  $K_2CO_3$  (2.10 g, 15.0 mmol) in THF (30 mL) at 50 °C for 8 h. The residue was purified by flash column chromatography on silica gel with methyl *tert*-butyl ether / cyclohexane = 1 : 10 as the eluent to afford **1s** as a colorless liquid (1.80 g, 94% yield).  **$^1H$  NMR** (500 MHz,  $CDCl_3$ ):  $\delta$  7.35 – 7.33 (m, 4H), 7.25 – 7.21 (m, 1H), 3.57 (s, 2H), 2.51 (q,  $J$  = 7.1 Hz, 2H), 2.43 (t,  $J$  = 7.3 Hz, 2H), 1.50 – 1.44 (m, 2H), 1.35 – 1.27 (m, 2H), 1.04 (t,  $J$  = 7.1 Hz, 3H), 0.89 (t,  $J$  = 7.4 Hz, 3H) ppm.  **$^{13}C$  NMR** (125 MHz,  $CDCl_3$ ):  $\delta$  140.3, 129.0, 128.2, 126.8, 58.2, 53.1, 47.4, 29.4, 20.8, 14.2, 11.9 ppm. **HRMS** (APCI): Calculated for  $C_{13}H_{22}N^+$   $[M+H]^+$ : 192.1752; Found: 192.1743. **IR** (ATR):  $\tilde{\nu}$  2957, 2929, 2869, 2793, 1493, 1452, 1368, 1187, 1160, 1071, 1027, 728, 696.

### 3 Experiment Details for the Two-Fold C(sp<sup>3</sup>)-H Silylation

#### 3.1 General Procedure for the Two-Fold C(sp<sup>3</sup>)-H Silylation

In a nitrogen-filled glovebox, a 10-mL sealed tube equipped with a magnetic stir bar was charged with the desired amount of amine, hydrosilane, solvent, additive, and B(C<sub>6</sub>F<sub>5</sub>)<sub>3</sub>. The sealed tube was fitted with a cap, and the reaction stirred at required temperature for indicated time in a preheated oil bath. After the resulting reaction mixture was cooled to room temperature, the volatile were removed under reduced pressure. *In the case of R<sub>3</sub>SiOTf as an additive, the solution was neutralized upon stirring with NaOH (5 mL, 10% aq.) for 30 min. The mixture was extracted with methyl tert-butyl ether (10 mL×3). The combined organic layers were washed with brine (15 mL), dried over Na<sub>2</sub>SO<sub>4</sub>, and the solvent was removed under reduced pressure.* Mesitylene (0.500 equiv) was added as an internal standard, and the yield was determined by <sup>1</sup>H NMR spectroscopy. The residue was purified by a sequence of flash column chromatography on silica gel with methyl *tert*-butyl ether / cyclohexane for *N*-benzyl-substituted 4-silapiperidines or MeOH / methyl *tert*-butyl ether for *N*-alkyl-substituted 4-silapiperidines as the eluent and Kugelrohr distillation.

### 3.2 Characterization Data of the 4-Silapiperidines

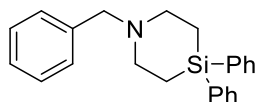

**1-Benzyl-4,4-diphenyl-1,4-azasilinane (3aa).** The general procedure was followed with *N*-benzyl-*N*-ethylethanamine (**1a**, 8.20 mg, 0.0500 mmol), Ph<sub>2</sub>SiH<sub>2</sub> (**2a**, 18.4 mg, 0.100 mmol), *p*-xylene (0.800 mL), Me<sub>3</sub>SiOTf (3.60 μL, 20.0 μmol) and B(C<sub>6</sub>F<sub>5</sub>)<sub>3</sub> (5.10 mg, 10.0 μmol) at 150 °C for 2 h. The residue was purified by a sequence of flash column chromatography on silica gel with methyl *tert*-butyl ether / cyclohexane = 1 : 10 as the eluent and Kugelrohr distillation (200 °C, 2 mbar) to afford the 4-silapiperidine product as a colorless viscous liquid (12.5 mg, 73% yield). **<sup>1</sup>H NMR** (500 MHz, CDCl<sub>3</sub>): δ 7.60 – 7.57 (m, 4H), 7.44 – 7.33 (m, 10H), 7.29 – 7.25 (m, 1H), 3.62 (s, 2H), 2.86 (t, *J* = 6.3 Hz, 4H), 1.40 (t, *J* = 6.3 Hz, 4H) ppm. **<sup>13</sup>C NMR** (125 MHz, CDCl<sub>3</sub>): δ 139.6, 136.0, 134.8, 129.5, 128.9, 128.3, 128.0, 126.9, 62.8, 52.4, 11.5 ppm. **<sup>1</sup>H/<sup>29</sup>Si HMQC NMR** (500/99 MHz, CDCl<sub>3</sub>, 298 K, optimized for *J* = 7 Hz): δ 7.60 – 7.57/–15.4, 2.86/–15.4, 1.40/–15.4 ppm. **HRMS** (APCI): Calculated for C<sub>23</sub>H<sub>26</sub>NSi<sup>+</sup> [M+H]<sup>+</sup>: 344.1835; Found: 344.1828. **IR** (ATR):  $\tilde{\nu}$  2920, 2891, 2794, 2758, 1452, 1226, 1185, 1109, 968, 864, 724, 694. Spectral data is in agreement with published data.<sup>[10]</sup>

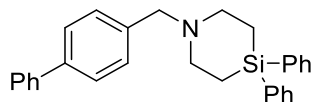

**1-([1,1'-Biphenyl]-4-ylmethyl)-4,4-diphenyl-1,4-azasilinane (3ba).** The general procedure was followed with *N*-([1,1'-biphenyl]-4-ylmethyl)-*N*-ethylethanamine (**1b**, 23.9 mg, 0.100 mmol), Ph<sub>2</sub>SiH<sub>2</sub> (**2a**, 36.8 mg, 0.200 mmol), *p*-xylene (0.800 mL), Me<sub>3</sub>SiOTf (7.20 μL, 40.0 μmol) and B(C<sub>6</sub>F<sub>5</sub>)<sub>3</sub> (10.2 mg, 20.0 μmol) at 150 °C for 2 h. The residue was purified by a sequence of flash column chromatography on silica gel with methyl *tert*-butyl ether / cyclohexane = 1 : 10 as the eluent and Kugelrohr distillation (240 °C, 2 mbar) to afford the 4-silapiperidine product as a colorless viscous liquid (23.9 mg, 57% yield). **<sup>1</sup>H NMR** (500 MHz, CDCl<sub>3</sub>): δ 7.65 – 7.58 (m, 8H), 7.48 – 7.35 (m, 11H), 3.66 (s, 2H), 2.89 (t, *J* = 6.5 Hz, 4H), 1.43 (t, *J* = 6.5 Hz, 4H) ppm. **<sup>13</sup>C NMR** (125 MHz, CDCl<sub>3</sub>): δ 141.2, 139.9, 138.7, 136.0, 134.8, 129.5, 129.3, 128.9, 128.1, 127.2, 127.2, 127.1, 62.5, 52.5, 11.5 ppm. **<sup>1</sup>H/<sup>29</sup>Si HMQC NMR** (500/99 MHz, CDCl<sub>3</sub>, 298 K, optimized for *J* = 7 Hz): δ 7.58/–15.5, 2.89/–15.5, 1.43/–15.5 ppm. **HRMS** (APCI): Calculated for C<sub>29</sub>H<sub>30</sub>NSi<sup>+</sup> [M+H]<sup>+</sup>: 420.2148; Found: 420.2138. **IR** (ATR):  $\tilde{\nu}$  2920, 2892, 2792, 2758, 1485, 1426, 1226, 1185, 1110, 1007, 970, 867, 727, 695.



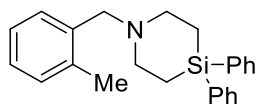

**1-(2-Methylbenzyl)-4,4-diphenyl-1,4-azasilinane (3ca).** The general procedure was followed with *N*-ethyl-*N*-(2-methylbenzyl)ethanamine (**1c**, 17.7 mg, 0.100 mmol),  $\text{Ph}_2\text{SiH}_2$  (**2a**, 36.8 mg, 0.200 mmol), *p*-xylene (0.800 mL),  $\text{Me}_3\text{SiOTf}$  (7.20  $\mu\text{L}$ , 40.0  $\mu\text{mol}$ ) and  $\text{B}(\text{C}_6\text{F}_5)_3$  (10.2 mg, 20.0  $\mu\text{mol}$ ) at 150 °C for 2 h. The residue was purified by a sequence of flash column chromatography on silica gel with methyl *tert*-butyl ether / cyclohexane = 1 : 10 as the eluent and Kugelrohr distillation (220 °C, 2 mbar) to afford the 4-silapiperidine product as a colorless viscous liquid (21.1 mg, 59% yield).  **$^1\text{H}$  NMR** (500 MHz,  $\text{CDCl}_3$ ):  $\delta$  7.58 – 7.55 (m, 4H), 7.42 – 7.33 (m, 7H), 7.18 – 7.14 (m, 3H), 3.52 (s, 2H), 2.83 (t,  $J = 5.2$  Hz, 4H), 2.37 (s, 3H), 1.36 (t,  $J = 5.2$  Hz, 4H) ppm.  **$^{13}\text{C}$  NMR** (125 MHz,  $\text{CDCl}_3$ ):  $\delta$  137.8, 137.5, 136.1, 134.8, 130.3, 129.5, 128.1, 126.9, 125.6, 60.7, 52.6, 19.4, 11.6 ppm.  **$^1\text{H}/^{29}\text{Si}$  HMQC NMR** (500/99 MHz,  $\text{CDCl}_3$ , 298 K, optimized for  $J = 7$  Hz):  $\delta$  7.58 – 7.55/–15.4, 2.83/–15.4, 1.36/–15.4 ppm. **HRMS** (APCI): Calculated for  $\text{C}_{24}\text{H}_{28}\text{NSi}^+$   $[\text{M}+\text{H}]^+$ : 358.1991; Found: 358.1984. **IR** (ATR):  $\tilde{\nu}$  2920, 2889, 2795, 2758, 1459, 1426, 1226, 1185, 1110, 969, 865, 728, 697.

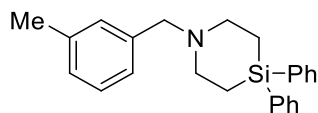

**1-(3-Methylbenzyl)-4,4-diphenyl-1,4-azasilinane (3da).** The general procedure was followed with *N*-ethyl-*N*-(3-methylbenzyl)ethanamine (**1d**, 17.7 mg, 0.100 mmol),  $\text{Ph}_2\text{SiH}_2$  (**2a**, 36.8 mg, 0.200 mmol), *p*-xylene (0.800 mL),  $\text{Me}_3\text{SiOTf}$  (7.20  $\mu\text{L}$ , 40.0  $\mu\text{mol}$ ) and  $\text{B}(\text{C}_6\text{F}_5)_3$  (10.2 mg, 20.0  $\mu\text{mol}$ ) at 150 °C for 2 h. The residue was purified by a sequence of flash column chromatography on silica gel with methyl *tert*-butyl ether / cyclohexane = 1 : 10 as the eluent and Kugelrohr distillation (220 °C, 2 mbar) to afford the 4-silapiperidine product as a colorless viscous liquid (20.8 mg, 58% yield).  **$^1\text{H}$  NMR** (500 MHz,  $\text{CDCl}_3$ ):  $\delta$  7.58 – 7.56 (m, 4H), 7.42 – 7.36 (m, 6H), 7.24 – 7.16 (m, 3H), 7.08 (d,  $J = 7.3$  Hz, 1H), 3.58 (s, 2H), 2.85 (t,  $J = 6.0$  Hz, 4H), 2.37 (s, 3H), 1.40 (t,  $J = 6.1$  Hz, 4H) ppm.  **$^{13}\text{C}$  NMR** (125 MHz,  $\text{CDCl}_3$ ):  $\delta$  137.9, 136.0, 134.8, 129.8, 129.5, 128.2, 128.1, 127.8, 126.1, 62.7, 52.4, 21.6, 11.3 ppm.  **$^1\text{H}/^{29}\text{Si}$  HMQC NMR** (500/99 MHz,  $\text{CDCl}_3$ , 298 K, optimized for  $J = 7$  Hz):  $\delta$  7.58 – 7.56/–15.8, 2.85/–15.8, 1.40/–15.8 ppm. **HRMS** (APCI): Calculated for  $\text{C}_{24}\text{H}_{28}\text{NSi}^+$   $[\text{M}+\text{H}]^+$ : 358.1991; Found: 358.1983. **IR** (ATR):  $\tilde{\nu}$  3045, 2921, 2794, 1427, 1389, 1227, 1112, 970, 865, 728, 698.

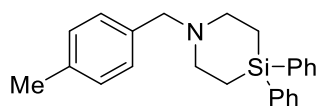

**1-(4-Methylbenzyl)-4,4-diphenyl-1,4-azasilinane (3ea).** The general procedure was followed with *N*-ethyl-*N*-(4-methylbenzyl)ethanamine (**1e**, 17.7 mg, 0.100 mmol),  $\text{Ph}_2\text{SiH}_2$  (**2a**, 36.8 mg, 0.200 mmol), *p*-xylene (0.800 mL),  $\text{Me}_3\text{SiOTf}$  (7.20  $\mu\text{L}$ , 40.0  $\mu\text{mol}$ ) and  $\text{B}(\text{C}_6\text{F}_5)_3$  (10.2 mg, 20.0  $\mu\text{mol}$ ) at 150 °C for 2 h. The residue was purified by a sequence of flash column chromatography on silica gel with methyl *tert*-butyl ether / cyclohexane = 1 : 10 as the eluent and Kugelrohr distillation (220 °C, 2 mbar) to afford the 4-silapiperidine product as a colorless viscous liquid (21.8 mg, 61% yield).  **$^1\text{H}$  NMR** (500 MHz,  $\text{CDCl}_3$ ):  $\delta$  7.58 – 7.56 (m, 4H), 7.42 – 7.36 (m, 6H), 7.26 (d,  $J$  = 8.0 Hz, 2H), 7.14 (d,  $J$  = 7.9 Hz, 2H), 3.58 (s, 2H), 2.84 (t,  $J$  = 6.1 Hz, 4H), 2.36 (s, 3H), 1.39 (t,  $J$  = 6.2 Hz, 4H) ppm.  **$^{13}\text{C}$  NMR** (125 MHz,  $\text{CDCl}_3$ ):  $\delta$  136.6, 136.1, 135.9, 134.8, 129.5, 129.0 (2C), 128.1, 62.5, 52.3, 21.2, 11.4 ppm.  **$^1\text{H}/^{29}\text{Si}$  HMQC NMR** (500/99 MHz,  $\text{CDCl}_3$ , 298 K, optimized for  $J$  = 7 Hz):  $\delta$  7.58 – 7.56/–15.6, 2.84/–15.6, 1.39/–15.6 ppm. **HRMS** (APCI): Calculated for  $\text{C}_{24}\text{H}_{28}\text{NSi}^+$   $[\text{M}+\text{H}]^+$ : 358.1991; Found: 358.1985. **IR** (ATR):  $\tilde{\nu}$  3045, 2920, 2792, 1426, 1186, 1111, 970, 867, 728, 698.

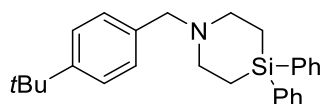

**1-(4-(*tert*-Butyl)benzyl)-4,4-diphenyl-1,4-azasilinane (3fa).** The general procedure was followed with *N*-(4-(*tert*-butyl)benzyl)-*N*-ethylethanamine (**1f**, 21.9 mg, 0.100 mmol),  $\text{Ph}_2\text{SiH}_2$  (**2a**, 36.8 mg, 0.200 mmol), *p*-xylene (0.800 mL),  $\text{Me}_3\text{SiOTf}$  (7.20  $\mu\text{L}$ , 40.0  $\mu\text{mol}$ ) and  $\text{B}(\text{C}_6\text{F}_5)_3$  (10.2 mg, 20.0  $\mu\text{mol}$ ) at 150 °C for 2 h. The residue was purified by a sequence of flash column chromatography on silica gel with methyl *tert*-butyl ether / cyclohexane = 1 : 10 as the eluent and Kugelrohr distillation (230 °C, 2 mbar) to afford the 4-silapiperidine product as a colorless viscous liquid (26.7 mg, 67% yield).  **$^1\text{H}$  NMR** (500 MHz,  $\text{CDCl}_3$ ):  $\delta$  7.59 – 7.57 (m, 4H), 7.43 – 7.35 (m, 8H), 7.30 (d,  $J$  = 8.0 Hz, 2H), 3.60 (s, 2H), 2.86 (t,  $J$  = 5.7 Hz, 4H), 1.41 (t,  $J$  = 5.7 Hz, 4H), 1.35 (s, 9H) ppm.  **$^{13}\text{C}$  NMR** (125 MHz,  $\text{CDCl}_3$ ):  $\delta$  149.9, 136.0, 135.9, 134.8, 129.5, 128.7, 128.1, 125.2, 62.4, 52.4, 34.6, 31.5, 11.3 ppm.  **$^1\text{H}/^{29}\text{Si}$  HMQC NMR** (500/99 MHz,  $\text{CDCl}_3$ , 298 K, optimized for  $J$  = 7 Hz):  $\delta$  7.59 – 7.57/–15.5, 2.86/–15.5, 1.41/–15.5 ppm. **HRMS** (APCI): Calculated for  $\text{C}_{27}\text{H}_{34}\text{NSi}^+$   $[\text{M}+\text{H}]^+$ : 400.2461; Found: 400.2451. **IR** (ATR):  $\tilde{\nu}$  3066, 2958, 2792, 1465, 1426, 1389, 1226, 1109, 970, 906, 867, 726, 696.

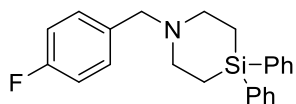

**1-(4-Fluorobenzyl)-4,4-diphenyl-1,4-azasilinane (3ga).** The general procedure was followed with *N*-ethyl-*N*-(4-fluorobenzyl)ethanamine (**1g**, 18.1 mg, 0.100 mmol), Ph<sub>2</sub>SiH<sub>2</sub> (**2a**, 36.8 mg, 0.200 mmol), *p*-xylene (0.800 mL), Me<sub>3</sub>SiOTf (7.20 μL, 40.0 μmol) and B(C<sub>6</sub>F<sub>5</sub>)<sub>3</sub> (10.2 mg, 20.0 μmol) at 150 °C for 2 h. The residue was purified by a sequence of flash column chromatography on silica gel with methyl *tert*-butyl ether / cyclohexane = 1 : 10 as the eluent and Kugelrohr distillation (220 °C, 2 mbar) to afford the 4-silapiperidine product as a colorless viscous liquid (25.3 mg, 70% yield). **<sup>1</sup>H NMR** (500 MHz, CDCl<sub>3</sub>): δ 7.56 – 7.54 (m, 4H), 7.41 – 7.35 (m, 6H), 7.32 – 7.29 (m, 2H), 7.02 – 6.98 (m, 2H), 3.55 (s, 2H), 2.81 (t, *J* = 6.1 Hz, 4H), 1.37 (t, *J* = 5.9 Hz, 4H) ppm. **<sup>13</sup>C NMR** (125 MHz, CDCl<sub>3</sub>): δ 162.0 (d, *J* = 244.6 Hz), 135.9, 135.3, 134.8, 130.3 (d, *J* = 7.9 Hz), 129.5, 128.1, 115.0 (d, *J* = 21.1 Hz), 62.0, 52.3, 11.5 ppm. **<sup>19</sup>F NMR** (471 MHz, CDCl<sub>3</sub>): δ –116.2 ppm. **<sup>1</sup>H/<sup>29</sup>Si HMQC NMR** (500/99 MHz, CDCl<sub>3</sub>, 298 K, optimized for *J* = 7 Hz): δ 7.56 – 7.54/–15.6, 2.81/–15.6, 1.37/–15.6 ppm. **HRMS** (APCI): Calculated for C<sub>23</sub>H<sub>25</sub>FNSi<sup>+</sup> [M+H]<sup>+</sup>: 362.1740; Found: 362.1727. **IR** (ATR):  $\tilde{\nu}$  3066, 2922, 2793, 1602, 1506, 1427, 1221, 1112, 971, 866, 729, 700.

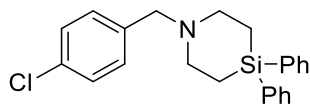

**1-(4-Chlorobenzyl)-4,4-diphenyl-1,4-azasilinane (3ha).** The general procedure was followed with *N*-ethyl-*N*-(4-chlorobenzyl)ethanamine (**1h**, 19.7 mg, 0.100 mmol), Ph<sub>2</sub>SiH<sub>2</sub> (**2a**, 36.8 mg, 0.200 mmol), *p*-xylene (0.800 mL), Me<sub>3</sub>SiOTf (7.20 μL, 40.0 μmol) and B(C<sub>6</sub>F<sub>5</sub>)<sub>3</sub> (10.2 mg, 20.0 μmol) at 150 °C for 2 h. The residue was purified by a sequence of flash column chromatography on silica gel with methyl *tert*-butyl ether / cyclohexane = 1 : 10 as the eluent and Kugelrohr distillation (230 °C, 2 mbar) to afford the 4-silapiperidine product as a colorless viscous liquid (24.6 mg, 65% yield). **<sup>1</sup>H NMR** (500 MHz, CDCl<sub>3</sub>): δ 7.56 – 7.54 (m, 4H), 7.42 – 7.35 (m, 6H), 7.30 – 7.27 (m, 4H), 3.56 (s, 2H), 2.82 (t, *J* = 6.0 Hz, 4H), 1.38 (t, *J* = 6.0 Hz, 4H) ppm. **<sup>13</sup>C NMR** (125 MHz, CDCl<sub>3</sub>): δ 137.8, 135.7, 134.8, 132.7, 130.3, 129.6, 128.5, 128.1, 62.0, 52.4, 11.4 ppm. **<sup>1</sup>H/<sup>29</sup>Si HMQC NMR** (500/99 MHz, CDCl<sub>3</sub>, 298 K, optimized for *J* = 7 Hz): δ 7.56 – 7.54/–16.0, 2.82/–16.0, 1.38/–16.0 ppm. **HRMS** (APCI): Calculated for C<sub>23</sub>H<sub>25</sub>ClNSi<sup>+</sup> [M+H]<sup>+</sup>: 378.1445; Found: 378.1440. **IR** (ATR):  $\tilde{\nu}$  3066, 2922, 2796, 1488, 1427, 1112, 1015, 971, 868, 699.

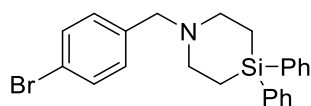

**1-(4-Bromobenzyl)-4,4-diphenyl-1,4-azasilinane (3ia).** The general procedure was followed with *N*-ethyl-*N*-(4-bromobenzyl)ethanamine (**1i**, 24.2 mg, 0.100 mmol),  $\text{Ph}_2\text{SiH}_2$  (**2a**, 36.8 mg, 0.200 mmol), *p*-xylene (0.800 mL),  $\text{Me}_3\text{SiOTf}$  (7.20  $\mu\text{L}$ , 40.0  $\mu\text{mol}$ ) and  $\text{B}(\text{C}_6\text{F}_5)_3$  (10.2 mg, 20.0  $\mu\text{mol}$ ) at 150 °C for 2 h. The residue was purified by a sequence of flash column chromatography on silica gel with methyl *tert*-butyl ether / cyclohexane = 1 : 10 as the eluent and Kugelrohr distillation (230 °C, 2 mbar) to afford the 4-silapiperidine product as a colorless viscous liquid (28.8 mg, 68% yield).  **$^1\text{H}$  NMR** (500 MHz,  $\text{CDCl}_3$ ):  $\delta$  7.57 – 7.54 (m, 4H), 7.45 – 7.36 (m, 8H), 7.24 (d,  $J$  = 8.3 Hz, 2H), 3.54 (s, 2H), 2.82 (t,  $J$  = 6.2 Hz, 4H), 1.38 (t,  $J$  = 6.2 Hz, 4H) ppm.  **$^{13}\text{C}$  NMR** (125 MHz,  $\text{CDCl}_3$ ):  $\delta$  138.3, 135.7, 134.8, 131.4, 130.6, 129.6, 128.1, 120.8, 62.1, 52.4, 11.4 ppm.  **$^1\text{H}/^{29}\text{Si}$  HMQC NMR** (500/99 MHz,  $\text{CDCl}_3$ , 298 K, optimized for  $J$  = 7 Hz):  $\delta$  7.57 – 7.54/–15.7, 2.82/–15.5, 1.38/–15.5 ppm. **HRMS** (APCI): Calculated for  $\text{C}_{23}\text{H}_{25}\text{BrNSi}^+$   $[\text{M}+\text{H}]^+$ : 422.0940; Found: 422.0933. **IR** (ATR):  $\tilde{\nu}$  3066, 2922, 2795, 1485, 1427, 1388, 1112, 1011, 971, 699.

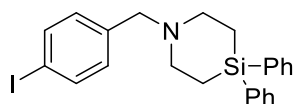

**1-(4-Iodobenzyl)-4,4-diphenyl-1,4-azasilinane (3ja).** The general procedure was followed with *N*-ethyl-*N*-(4-iodobenzyl)ethanamine (**1j**, 28.9 mg, 0.100 mmol),  $\text{Ph}_2\text{SiH}_2$  (**2a**, 36.8 mg, 0.200 mmol), *p*-xylene (0.800 mL),  $\text{Me}_3\text{SiOTf}$  (7.20  $\mu\text{L}$ , 40.0  $\mu\text{mol}$ ) and  $\text{B}(\text{C}_6\text{F}_5)_3$  (10.2 mg, 20.0  $\mu\text{mol}$ ) at 150 °C for 2 h. The residue was purified by a sequence of flash column chromatography on silica gel with methyl *tert*-butyl ether / cyclohexane = 1 : 10 as the eluent and Kugelrohr distillation (220 °C, 2 mbar) to afford the 4-silapiperidine product as a colorless viscous liquid (30.1 mg, 64% yield).  **$^1\text{H}$  NMR** (500 MHz,  $\text{CDCl}_3$ ):  $\delta$  7.65 (d,  $J$  = 8.3 Hz, 2H), 7.57 – 7.55 (m, 4H), 7.43 – 7.36 (m, 6H), 7.12 (d,  $J$  = 8.3 Hz, 2H), 3.53 (s, 2H), 2.82 (t,  $J$  = 6.1 Hz, 4H), 1.38 (t,  $J$  = 6.2 Hz, 4H) ppm.  **$^{13}\text{C}$  NMR** (125 MHz,  $\text{CDCl}_3$ ):  $\delta$  139.3, 137.4, 135.8, 134.8, 130.9, 129.5, 128.1, 92.3, 62.2, 52.4, 11.5 ppm.  **$^1\text{H}/^{29}\text{Si}$  HMQC NMR** (500/99 MHz,  $\text{CDCl}_3$ , 298 K, optimized for  $J$  = 7 Hz):  $\delta$  7.57 – 7.55/–15.8, 2.82/–15.8, 1.38/–15.8 ppm. **HRMS** (APCI): Calculated for  $\text{C}_{23}\text{H}_{25}\text{INSi}^+$   $[\text{M}+\text{H}]^+$ : 470.0801; Found: 470.0782. **IR** (ATR):  $\tilde{\nu}$  3065, 2920, 2792, 1586, 1480, 1425, 1386, 1110, 969, 906, 865, 726, 695.

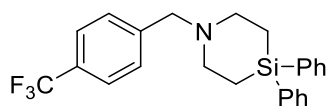

**4,4-Diphenyl-1-(4-(trifluoromethyl)benzyl)-1,4-azasilinane (3ka).** The general procedure was followed with *N*-ethyl-*N*-(4-(trifluoromethyl)benzyl)ethanamine (**1k**, 23.1 mg, 0.100 mmol), Ph<sub>2</sub>SiH<sub>2</sub> (**2a**, 36.8 mg, 0.200 mmol), *p*-xylene (0.800 mL), Me<sub>3</sub>SiOTf (7.20 μL, 40.0 μmol) and B(C<sub>6</sub>F<sub>5</sub>)<sub>3</sub> (10.2 mg, 20.0 μmol) at 150 °C for 2 h. The residue was purified by a sequence of flash column chromatography on silica gel with methyl *tert*-butyl ether / cyclohexane = 1 : 10 as the eluent and Kugelrohr distillation (220 °C, 2 mbar) to afford the 4-silapiperidine product as a colorless viscous liquid (21.1 mg, 51% yield). **<sup>1</sup>H NMR** (500 MHz, CDCl<sub>3</sub>): δ 7.60 – 7.57 (m, 6H), 7.50 (d, *J* = 8.1 Hz, 2H), 7.44 – 7.38 (m, 6H), 3.65 (s, 2H), 2.84 (t, *J* = 6.2 Hz, 4H), 1.41 (t, *J* = 6.2 Hz, 4H) ppm. **<sup>13</sup>C NMR** (125 MHz, CDCl<sub>3</sub>): δ 143.9, 135.7, 134.8, 129.6, 129.2 (q, *J* = 32.4 Hz), 128.9, 128.1, 125.3 (q, *J* = 3.6 Hz), 124.5 (q, *J* = 271.9 Hz), 62.3, 52.6, 11.5 ppm. **<sup>19</sup>F NMR** (471 MHz, CDCl<sub>3</sub>): δ –62.3 ppm. **<sup>1</sup>H/<sup>29</sup>Si HMQC NMR** (500/99 MHz, CDCl<sub>3</sub>, 298 K, optimized for *J* = 7 Hz): δ 7.60 – 7.57/–15.8, 2.84/–15.8, 1.41/–15.8 ppm. **HRMS** (APCI): Calculated for C<sub>24</sub>H<sub>25</sub>F<sub>3</sub>NSi<sup>+</sup> [M+H]<sup>+</sup>: 412.1708; Found: 412.1694. **IR** (ATR):  $\tilde{\nu}$  3067, 2922, 2795, 1426, 1321, 1159, 1110, 1063, 1017, 970, 867, 697.

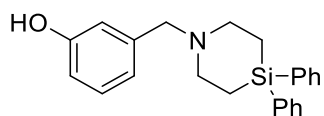

**3-((4,4-Diphenyl-1,4-azasilinan-1-yl)methyl)phenol (3la).** The general procedure was followed with *N*-ethyl-*N*-(3-methoxybenzyl)ethanamine (**1l**, 19.3 mg, 0.100 mmol), Ph<sub>2</sub>SiH<sub>2</sub> (**2a**, 36.8 mg, 0.200 mmol), *p*-xylene (0.800 mL), Me<sub>3</sub>SiOTf (7.20 μL, 40.0 μmol) and B(C<sub>6</sub>F<sub>5</sub>)<sub>3</sub> (10.2 mg, 20.0 μmol) at 150 °C for 2 h. The residue was purified by a sequence of flash column chromatography on silica gel with methyl *tert*-butyl ether / cyclohexane = 1 : 1 as the eluent and Kugelrohr distillation (220 °C, 2 mbar) to afford the 4-silapiperidine product as a colorless viscous liquid (18.1 mg, 50% yield). **<sup>1</sup>H NMR** (500 MHz, CDCl<sub>3</sub>): δ 7.53 – 7.51 (m, 4H), 7.41 – 7.34 (m, 6H), 7.15 (t, *J* = 7.8 Hz, 1H), 6.84 – 6.81 (m, 2H), 6.76 (dd, *J* = 8.0, 1.8 Hz, 1H), 6.07 (br, 1H), 3.56 (s, 2H), 2.87 (t, *J* = 6.2 Hz, 4H), 1.39 (t, *J* = 6.2 Hz, 4H) ppm. **<sup>13</sup>C NMR** (125 MHz, CDCl<sub>3</sub>): δ 156.7, 139.3, 135.3, 134.9, 129.6, 129.5, 128.1, 121.5, 117.0, 115.2, 62.6, 52.4, 10.8 ppm. **<sup>1</sup>H/<sup>29</sup>Si HMQC NMR** (500/99 MHz, CDCl<sub>3</sub>, 298 K, optimized for *J* = 7 Hz): δ 7.53 – 7.51/–16.0, 2.87/–16.0, 1.39/–16.0 ppm. **HRMS** (APCI): Calculated for C<sub>23</sub>H<sub>26</sub>NOSi<sup>+</sup>

[M+H]<sup>+</sup>: 360.1784; Found: 360.1778. **IR** (ATR):  $\tilde{\nu}$  3295, 3045, 2924, 2084, 1588, 1454, 1265, 1112, 972, 908, 861, 699.

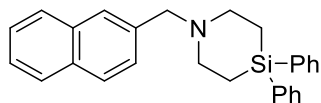

**1-(Naphthalen-2-ylmethyl)-4,4-diphenyl-1,4-azasilinane (3ma)**. The general procedure was followed with *N*-ethyl-*N*-(naphthalen-2-ylmethyl)ethanamine (**1m**, 21.3 mg, 0.100 mmol), Ph<sub>2</sub>SiH<sub>2</sub> (**2a**, 36.8 mg, 0.200 mmol), *p*-xylene (0.800 mL), Me<sub>3</sub>SiOTf (7.20  $\mu$ L, 40.0  $\mu$ mol) and B(C<sub>6</sub>F<sub>5</sub>)<sub>3</sub> (10.2 mg, 20.0  $\mu$ mol) at 150 °C for 2 h. The residue was purified by a sequence of flash column chromatography on silica gel with methyl *tert*-butyl ether / cyclohexane = 1 : 10 as the eluent and Kugelrohr distillation (240 °C, 2 mbar) to afford the 4-silapiperidine product as a colorless viscous liquid (18.2 mg, 46% yield). **<sup>1</sup>H NMR** (500 MHz, CDCl<sub>3</sub>):  $\delta$  7.86 – 7.83 (m, 3H), 7.78 (s, 1H), 7.60 – 7.56 (m, 5H), 7.51 – 7.45 (m, 2H), 7.44 – 7.38 (m, 6H), 3.78 (s, 2H), 2.91 (t, *J* = 6.2 Hz, 4H), 1.43 (t, *J* = 6.3 Hz, 4H) ppm. **<sup>13</sup>C NMR** (125 MHz, CDCl<sub>3</sub>):  $\delta$  137.1, 136.0, 134.8, 133.5, 132.9, 129.5, 128.1, 128.0, 127.8, 127.8, 127.4, 127.4, 126.0, 125.6, 62.9, 52.5, 11.4 ppm. **<sup>1</sup>H/<sup>29</sup>Si HMQC NMR** (500/99 MHz, CDCl<sub>3</sub>, 298 K, optimized for *J* = 7 Hz):  $\delta$  7.60 – 7.56/–15.7, 2.91/–15.7, 1.43/–15.7 ppm. **HRMS** (APCI): Calculated for C<sub>27</sub>H<sub>28</sub>NSi<sup>+</sup> [M+H]<sup>+</sup>: 394.1991; Found: 394.1982. **IR** (ATR):  $\tilde{\nu}$  3046, 2920, 2798, 1426, 1328, 1110, 971, 864, 727, 698.

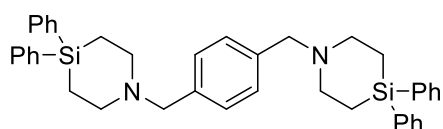

**1,4-Bis((4,4-diphenyl-1,4-azasilinan-1-yl)methyl)benzene (3na)**. The general procedure was followed with *N,N'*-(1,4-phenylenebis(methylene))bis(*N*-ethylethanamine) (**1n**, 24.8 mg, 0.100 mmol), Ph<sub>2</sub>SiH<sub>2</sub> (**2a**, 73.6 mg, 0.400 mmol), *p*-xylene (0.800 mL), Me<sub>3</sub>SiOTf (14.4  $\mu$ L, 80.0  $\mu$ mol) and B(C<sub>6</sub>F<sub>5</sub>)<sub>3</sub> (20.4 mg, 40.0  $\mu$ mol) at 150 °C for 2 h. The residue was purified by a sequence of flash column chromatography on silica gel with methyl *tert*-butyl ether / cyclohexane = 1 : 1 as the eluent and Kugelrohr distillation (250 °C, 0.2 mbar) to afford the 4-silapiperidine product as a colorless viscous liquid (28.7 mg, 47% yield). **<sup>1</sup>H NMR** (500 MHz, CDCl<sub>3</sub>):  $\delta$  7.56 (d, *J* = 7.4 Hz, 8H), 7.41 – 7.36 (m, 12H), 7.29 (s, 4H), 3.59 (s, 4H), 2.84 (t, *J* = 5.5 Hz, 8H), 1.38 (t, *J* = 5.5 Hz, 8H) ppm. **<sup>13</sup>C NMR** (125 MHz, CDCl<sub>3</sub>):  $\delta$  138.0, 136.0, 134.8, 129.5, 128.8, 128.1, 62.5, 52.4, 11.4 ppm. **<sup>1</sup>H/<sup>29</sup>Si HMQC NMR** (500/99 MHz, CDCl<sub>3</sub>, 298 K,

optimized for  $J = 7$  Hz):  $\delta$  7.56/–15.8, 2.84/–15.8, 1.38/–15.8 ppm. **HRMS** (APCI): Calculated for  $C_{40}H_{45}N_2Si_2^+$   $[M+H]^+$ : 609.3121; Found: 609.3119. **IR** (ATR):  $\tilde{\nu}$  2921, 2893, 2792, 2757, 1426, 1387, 1226, 1185, 1110, 969, 906, 866, 725, 696.

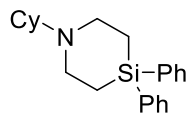

**1-Cyclohexyl-4,4-diphenyl-1,4-azasilinane (30a).** The general procedure was followed with *N,N*-diethylcyclohexanamine (**1o**, 15.5 mg, 0.100 mmol),  $Ph_2SiH_2$  (**2a**, 36.8 mg, 0.200 mmol), *p*-xylene (0.800 mL),  $Me_3SiOTf$  (7.20  $\mu$ L, 40.0  $\mu$ mol) and  $B(C_6F_5)_3$  (10.2 mg, 20.0  $\mu$ mol) at 150  $^\circ$ C for 2 h. The residue was purified by a sequence of flash column chromatography on silica gel with MeOH / methyl *tert*-butyl ether = 1 : 10 as the eluent and Kugelrohr distillation (180  $^\circ$ C, 2 mbar) to afford the 4-silapiperidine product as a colorless viscous liquid (12.8 mg, 38% yield).  **$^1H$  NMR** (500 MHz,  $CDCl_3$ ):  $\delta$  7.56 – 7.54 (m, 4H), 7.40 – 7.34 (m, 6H), 2.97 (t,  $J = 6.5$  Hz, 4H), 2.52 (t,  $J = 7.7$  Hz, 1H), 1.86 – 1.77 (m, 4H), 1.62 (d,  $J = 13.8$  Hz, 1H), 1.38 (t,  $J = 6.5$  Hz, 4H), 1.28 – 1.17 (m, 4H), 1.11 – 1.03 (m, 1H) ppm.  **$^{13}C$  NMR** (125 MHz,  $CDCl_3$ ):  $\delta$  136.0, 134.9, 129.5, 128.1, 64.4, 48.8, 29.1, 26.5, 26.3, 11.8 ppm.  **$^1H/^{29}Si$  HMQC NMR** (500/99 MHz,  $CDCl_3$ , 298 K, optimized for  $J = 7$  Hz):  $\delta$  7.56 – 7.54/–14.6, 2.97/–14.6, 1.38/–14.6 ppm. **HRMS** (APCI): Calculated for  $C_{22}H_{30}NSi^+$   $[M+H]^+$ : 336.2148; Found: 336.2142. **IR** (ATR):  $\tilde{\nu}$  3065, 2922, 2850, 2795, 1374, 1227, 1110, 987, 863, 728, 698.

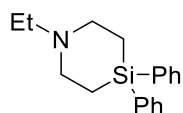

**1-Ethyl-4,4-diphenyl-1,4-azasilinane (3pa).** The general procedure was followed with triethylamine (**1p**, 10.1 mg, 0.100 mmol),  $Ph_2SiH_2$  (**2a**, 36.8 mg, 0.200 mmol), *p*-xylene (0.800 mL),  $Me_3SiOTf$  (7.20  $\mu$ L, 40.0  $\mu$ mol) and  $B(C_6F_5)_3$  (10.2 mg, 20.0  $\mu$ mol) at 150  $^\circ$ C for 2 h. The residue was purified by a sequence of flash column chromatography on silica gel with MeOH / methyl *tert*-butyl ether = 1 : 10 as the eluent and Kugelrohr distillation (150  $^\circ$ C, 2 mbar) to afford the 4-silapiperidine product as a colorless viscous liquid (16.9 mg, 60% yield).  **$^1H$  NMR** (500 MHz,  $CDCl_3$ ):  $\delta$  7.56 – 7.54 (m, 4H), 7.42 – 7.35 (m, 6H), 2.93 (t,  $J = 6.1$  Hz, 4H), 2.64 (q,  $J = 7.2$  Hz, 2H), 1.47 (t,  $J = 6.1$  Hz, 4H), 1.14 (t,  $J = 7.2$  Hz, 3H) ppm.  **$^{13}C$  NMR** (125 MHz,  $CDCl_3$ ):  $\delta$  135.0, 134.9, 129.7, 128.2, 52.0, 51.9, 11.7, 10.8 ppm.  **$^1H/^{29}Si$  HMQC NMR** (500/99 MHz,  $CDCl_3$ , 298 K, optimized for  $J = 7$  Hz):  $\delta$  7.56 – 7.54/–15.6, 2.93/–15.6, 1.47/–15.6 ppm.

**HRMS** (APCI): Calculated for  $C_{18}H_{24}NSi^+$   $[M+H]^+$ : 282.1678; Found: 282.1669. **IR** (ATR):  $\tilde{\nu}$  3066, 2923, 2799, 1427, 1229, 1111, 984, 867, 707.

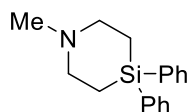

**1-Methyl-4,4-diphenyl-1,4-azasilinane (3qa)**. The general procedure was followed with *N*-ethyl-*N*-methylethanamine (**1q**, 8.70 mg, 0.100 mmol),  $Ph_2SiH_2$  (**2a**, 36.8 mg, 0.200 mmol), *p*-xylene (0.800 mL),  $Me_3SiOTf$  (7.20  $\mu$ L, 40.0  $\mu$ mol) and  $B(C_6F_5)_3$  (10.2 mg, 20.0  $\mu$ mol) at 150 °C for 2 h. The residue was purified by a sequence of flash column chromatography on silica gel with MeOH / methyl *tert*-butyl ether = 1 : 10 as the eluent and Kugelrohr distillation (150 °C, 2 mbar) to afford the 4-silapiperidine product as a colorless viscous liquid (12.9 mg, 48% yield). **<sup>1</sup>H NMR** (500 MHz,  $CDCl_3$ ):  $\delta$  7.56 – 7.53 (m, 4H), 7.42 – 7.35 (m, 6H), 2.77 (t,  $J$  = 6.2 Hz, 4H), 2.34 (s, 3H), 1.42 (t,  $J$  = 6.2 Hz, 4H) ppm. **<sup>13</sup>C NMR** (125 MHz,  $CDCl_3$ ):  $\delta$  135.3, 134.9, 129.6, 128.1, 54.9, 47.2, 11.7 ppm. **<sup>1</sup>H/<sup>29</sup>Si HMQC NMR** (500/99 MHz,  $CDCl_3$ , 298 K, optimized for  $J$  = 7 Hz):  $\delta$  7.56 – 7.53/–16.5, 2.77/–16.5, 1.42/–16.5 ppm. **HRMS** (APCI): Calculated for  $C_{17}H_{22}NSi^+$   $[M+H]^+$ : 268.1522; Found: 268.1514. **IR** (ATR):  $\tilde{\nu}$  3066, 2924, 2781, 1464, 1374, 1246, 1181, 1112, 968, 729, 707.

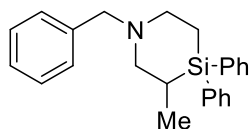

**1-Benzyl-3-methyl-4,4-diphenyl-1,4-azasilinane (3ra)**. The general procedure was followed with *N*-benzyl-*N*-ethylpropan-1-amine (**1r**, 17.7 mg, 0.100 mmol),  $Ph_2SiH_2$  (**2a**, 36.8 mg, 0.200 mmol), *p*-xylene (0.800 mL),  $Me_3SiOTf$  (7.20  $\mu$ L, 40.0  $\mu$ mol) and  $B(C_6F_5)_3$  (10.2 mg, 20.0  $\mu$ mol) at 150 °C for 2 h. The residue was purified by a sequence of flash column chromatography on silica gel with methyl *tert*-butyl ether / cyclohexane = 1 : 10 as the eluent and Kugelrohr distillation (220 °C, 2 mbar) to afford the 4-silapiperidine product as a colorless viscous liquid (16.5 mg, 46% yield). **<sup>1</sup>H NMR** (500 MHz,  $CDCl_3$ ):  $\delta$  7.62 – 7.57 (m, 4H), 7.44 – 7.34 (m, 10H), 7.29 – 7.26 (m, 1H), 3.63 (q,  $J$  = 15.7 Hz, 2H), 3.04 – 2.99 (m, 1H), 2.92 – 2.88 (m, 1H), 2.86 – 2.81 (m, 1H), 2.52 – 2.47 (m, 1H), 1.72 – 1.68 (m, 1H), 1.49 – 1.44 (m, 1H), 1.37 – 1.31 (m, 1H), 1.11 (dd,  $J$  = 7.6, 2.3 Hz, 3H) ppm. **<sup>13</sup>C NMR** (125 MHz,  $CDCl_3$ ):  $\delta$  139.8, 136.0, 135.9, 135.0, 134.6, 129.5, 129.4, 128.9, 128.3, 128.0, 127.8, 126.9, 63.3, 61.1, 53.2, 17.8, 14.9, 11.1 ppm. **<sup>1</sup>H/<sup>29</sup>Si HMQC NMR** (500/99 MHz,  $CDCl_3$ , 298 K, optimized for  $J$  = 7 Hz):



$\delta$  7.62 – 7.57/–13.7, 3.04 – 2.99/–13.7, 2.92 – 2.88/–13.7, 1.49 – 1.44/–13.7, 1.37 – 1.31/–13.7, 1.11/–13.7 ppm. **HRMS** (APCI): Calculated for  $C_{24}H_{28}NSi^+$   $[M+H]^+$ : 358.1991; Found: 358.1982. **IR** (ATR):  $\tilde{\nu}$  2921, 2863, 2794, 2756, 1452, 1426, 1314, 1186, 1107, 993, 960, 886, 695.

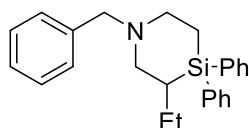

**1-Benzyl-3-ethyl-4,4-diphenyl-1,4-azasilinane (3sa).** The general procedure was followed with *N*-benzyl-*N*-ethylbutan-1-amine (**1s**, 19.1 mg, 0.100 mmol),  $Ph_2SiH_2$  (**2a**, 36.8 mg, 0.200 mmol), *p*-xylene (0.800 mL),  $Me_3SiOTf$  (7.20  $\mu$ L, 40.0  $\mu$ mol) and  $B(C_6F_5)_3$  (10.2 mg, 20.0  $\mu$ mol) at 150 °C for 2 h. The residue was purified by a sequence of flash column chromatography on silica gel with methyl *tert*-butyl ether / cyclohexane = 1 : 10 as the eluent and Kugelrohr distillation (220 °C, 2 mbar) to afford the 4-silapiperidine product as a colorless viscous liquid (14.2 mg, 38% yield).  **$^1H$  NMR** (500 MHz,  $CDCl_3$ ):  $\delta$  7.57 – 7.53 (m, 4H), 7.41 – 7.30 (m, 10H), 7.26 – 7.23 (m, 1H), 3.64 – 3.54 (m, 2H), 2.90 – 2.78 (m, 3H), 2.53 (t,  $J$  = 8.0 Hz, 1H), 1.60 – 1.53 (m, 1H), 1.44 – 1.40 (m, 3H), 1.28 (s, 1H), 0.79 (t,  $J$  = 7.0 Hz, 3H) ppm.  **$^{13}C$  NMR** (125 MHz,  $CDCl_3$ ):  $\delta$  139.8, 136.1, 135.8, 135.1, 134.6, 129.4, 129.0, 128.3, 128.0, 127.9, 127.0, 63.4, 57.5, 53.2, 25.7, 22.2, 13.9, 11.4 ppm.  **$^1H/^{29}Si$  HMQC NMR** (500/99 MHz,  $CDCl_3$ , 298 K, optimized for  $J$  = 7 Hz):  $\delta$  7.57 – 7.53/–14.5, 2.90 – 2.78/–14.5, 2.53/–14.5, 1.60 – 1.53/–14.5, 1.44 – 1.40/–14.5 ppm. **HRMS** (APCI): Calculated for  $C_{25}H_{30}NSi^+$   $[M+H]^+$ : 372.2148; Found: 372.2137. **IR** (ATR):  $\tilde{\nu}$  2955, 2922, 2869, 2796, 1453, 1427, 1109, 973, 865, 699.

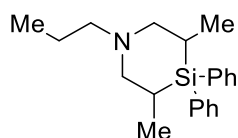

**3,5-Dimethyl-4,4-diphenyl-1-propyl-1,4-azasilinane (3ta, *cis:trans* = 58:42).** The general procedure was followed with tripropylamine (**1t**, 14.3 mg, 0.100 mmol),  $Ph_2SiH_2$  (**2a**, 36.8 mg, 0.200 mmol), *p*-xylene (0.800 mL),  $Me_3SiOTf$  (7.20  $\mu$ L, 40.0  $\mu$ mol) and  $B(C_6F_5)_3$  (10.2 mg, 20.0  $\mu$ mol) at 150 °C for 2 h. The residue was purified by a sequence of flash column chromatography on silica gel with MeOH / methyl *tert*-butyl ether = 1 : 30 as the eluent and Kugelrohr distillation (180 °C, 2 mbar) to afford the 4-silapiperidine product as a colorless

viscous liquid (13.3 mg, 41% yield, *cis:trans* = 58:42). The stereochemistry of **3ta** was determined by 2D-NOESY. **<sup>1</sup>H NMR** (500 MHz, CDCl<sub>3</sub>): δ 7.62 – 7.51 (m, 4H), 7.44 – 7.33 (m, 6H), 3.07 – 2.83 (m, 2H), 2.58 – 2.49 (m, 3H), 2.45 – 2.32 (m, 1H), 1.76 – 1.69 (m, 1H), 1.64 – 1.56 (m, 2H), 1.55 – 1.48 (m, 1H), 1.03 – 0.98 (m, 6H), 0.94 – 0.90 (m, 3H) ppm. **<sup>13</sup>C NMR** (125 MHz, CDCl<sub>3</sub>): δ 137.0, 136.0, 135.3, 134.9, 134.5, 132.4, 129.6, 129.4, 129.3, 128.0, 127.8, 127.7, 61.9, 61.7, 61.5, 60.7, 20.6, 20.3, 18.3, 15.9, 15.4, 13.9, 12.2, 12.1 ppm. **<sup>1</sup>H/<sup>29</sup>Si HMQC NMR** (500/99 MHz, CDCl<sub>3</sub>, 298 K, optimized for *J* = 7 Hz): δ 7.62 – 7.51/–10.6, 3.07 – 2.83/–10.6, 2.58 – 2.49/–10.6, 1.76 – 1.69/–10.6, 1.03 – 0.98/–10.6 ppm. **HRMS** (APCI): Calculated for C<sub>21</sub>H<sub>30</sub>NSi<sup>+</sup> [M+H]<sup>+</sup>: 324.2148; Found: 324.2137. **IR** (ATR):  $\tilde{\nu}$  2935, 2863, 2766, 1457, 1425, 1376, 1195, 1108, 997, 885, 696.

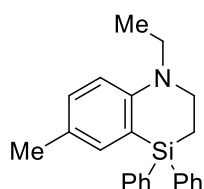

**1-Ethyl-6-methyl-4,4-diphenyl-1,2,3,4-tetrahydrobenzo[*b*][1,4]azasiline (4ua).** The general procedure was followed with *N,N*-diethyl-4-methylaniline (**1u**, 16.3 mg, 0.100 mmol), Ph<sub>2</sub>SiH<sub>2</sub> (**2a**, 36.8 mg, 0.200 mmol), *p*-xylene (0.800 mL), Me<sub>3</sub>SiOTf (7.20 μL, 40.0 μmol) and B(C<sub>6</sub>F<sub>5</sub>)<sub>3</sub> (10.2 mg, 20.0 μmol) at 150 °C for 2 h. The residue was purified by a sequence of flash column chromatography on silica gel with methyl *tert*-butyl ether / cyclohexane = 1 : 100 as the eluent and Kugelrohr distillation (220 °C, 2 mbar) to afford the 4-silapiperidine product as a colorless viscous liquid (19.0 mg, 55% yield). **<sup>1</sup>H NMR** (500 MHz, CDCl<sub>3</sub>): δ 7.66 – 7.64 (m, 4H), 7.46 – 7.39 (m, 6H), 7.22 (s, 1H), 7.13 (dd, *J* = 8.5, 2.2 Hz, 1H), 6.77 (d, *J* = 8.6 Hz, 1H), 3.53 – 3.46 (m, 4H), 2.24 (s, 3H), 1.53 (t, *J* = 6.3 Hz, 2H), 1.20 (t, *J* = 7.1 Hz, 3H) ppm. **<sup>13</sup>C NMR** (125 MHz, CDCl<sub>3</sub>): δ 153.7, 137.7, 136.2, 135.7, 131.8, 129.5, 127.9, 125.3, 116.5, 112.9, 48.7, 47.4, 20.4, 12.6, 11.4 ppm. **<sup>1</sup>H/<sup>29</sup>Si HMQC NMR** (500/99 MHz, CDCl<sub>3</sub>, 298 K, optimized for *J* = 7 Hz): δ 7.66 – 7.64/–20.7, 7.22/–20.7, 6.77/–20.7, 3.53 – 3.46/–20.7, 1.53/–20.7 ppm. **HRMS** (APCI): Calculated for C<sub>23</sub>H<sub>26</sub>NSi<sup>+</sup> [M+H]<sup>+</sup>: 344.1835; Found: 344.1828. **IR** (ATR):  $\tilde{\nu}$  3065, 2969, 2926, 1604, 1487, 1426, 1332, 1277, 1108, 1068, 802, 699.

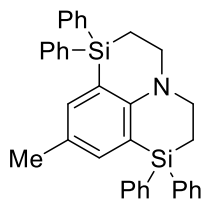**8-Methyl-1,1,6,6-tetraphenyl-2,3,5,6-tetrahydro-1H,4H-3a-aza-1,6-disilaphenalene (5ua).**

The following residue was further purified by Kugelrohr distillation (250 °C, 2 mbar) to afford the 4-silapiperidine product as a colorless viscous liquid (4.30 mg, 8% yield). **<sup>1</sup>H NMR** (500 MHz, CDCl<sub>3</sub>): δ 7.61 – 7.59 (m, 8H), 7.39 – 7.34 (m, 12H), 7.22 (s, 2H), 3.49 – 3.45 (m, 4H), 2.12 (s, 3H), 1.51 – 1.49 (m, 4H). **<sup>13</sup>C NMR** (125 MHz, CDCl<sub>3</sub>): δ 162.2, 139.6, 136.3, 135.7, 129.5, 128.0, 125.7, 117.3, 52.8, 20.5, 12.6 ppm. **<sup>1</sup>H/<sup>29</sup>Si HMQC NMR** (500/99 MHz, CDCl<sub>3</sub>, 298 K, optimized for *J* = 7 Hz): δ 7.61 – 7.59/–19.5, 7.39 – 7.34/–19.5, 7.22/–19.5, 3.49 – 3.45/–19.5, 1.51 – 1.49/–19.5 ppm. **HRMS** (APCI): Calculated for C<sub>35</sub>H<sub>34</sub>NSi<sub>2</sub><sup>+</sup> [M+H]<sup>+</sup>: 524.2230; Found: 524.2215. **IR** (ATR):  $\tilde{\nu}$  3066, 2934, 2809, 2134, 1536, 1483, 1427, 1262, 1109, 827, 733, 698.

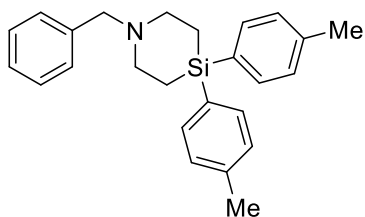

**1-Benzyl-4,4-di-*p*-tolyl-1,4-azasilinane (3ab).** The general procedure was followed with *N*-benzyl-*N*-ethylethanamine (**1a**, 16.3 mg, 0.100 mmol), di-*p*-tolylsilane (**2b**, 42.5 mg, 0.200 mmol), *p*-xylene (0.800 mL), Me<sub>3</sub>SiOTf (7.20 μL, 40.0 μmol) and B(C<sub>6</sub>F<sub>5</sub>)<sub>3</sub> (10.2 mg, 20.0 μmol) at 150 °C for 2 h. The residue was purified by a sequence of flash column chromatography on silica gel with methyl *tert*-butyl ether / cyclohexane = 1 : 10 as the eluent and Kugelrohr distillation (220 °C, 2 mbar) to afford the 4-silapiperidine product as a colorless viscous liquid (24.1 mg, 65% yield). **<sup>1</sup>H NMR** (500 MHz, CDCl<sub>3</sub>): δ 7.45 (d, *J* = 7.9 Hz, 4H), 7.37 – 7.30 (m, 4H), 7.26 – 7.23 (m, 1H), 7.19 (d, *J* = 7.5 Hz, 4H), 3.60 (s, 2H), 2.83 (t, *J* = 5.8 Hz, 4H), 2.37 (s, 6H), 1.35 (t, *J* = 5.7 Hz, 4H) ppm. **<sup>13</sup>C NMR** (125 MHz, CDCl<sub>3</sub>): δ 139.5, 139.3, 134.9, 132.4, 129.0, 128.9, 128.3, 127.0, 62.8, 52.5, 21.6, 11.6 ppm. **<sup>1</sup>H/<sup>29</sup>Si HMQC NMR** (500/99 MHz, CDCl<sub>3</sub>, 298 K, optimized for *J* = 7 Hz): δ 7.45/–16.0, 2.83/–16.0, 1.35/–16.0 ppm. **HRMS** (APCI): Calculated for C<sub>25</sub>H<sub>30</sub>NSi<sup>+</sup> [M+H]<sup>+</sup>: 372.2148; Found: 372.2135. **IR** (ATR):  $\tilde{\nu}$  3027, 2920, 2796, 1601, 1452, 1391, 1188, 1107, 970, 866, 799, 727.

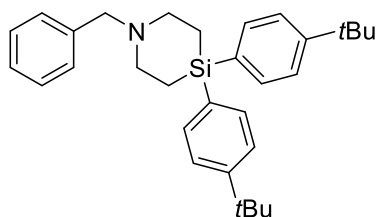

**1-Benzyl-4,4-bis(4-(tert-butyl)phenyl)-1,4-azasilinane (3ac).** The general procedure was followed with *N*-benzyl-*N*-ethylethanamine (**1a**, 16.3 mg, 0.100 mmol), bis(4-(tert-butyl)phenyl)silane (**2c**, 59.3 mg, 0.200 mmol), *p*-xylene (0.800 mL), Me<sub>3</sub>SiOTf (7.20 μL, 40.0 μmol) and B(C<sub>6</sub>F<sub>5</sub>)<sub>3</sub> (10.2 mg, 20.0 μmol) at 150 °C for 2 h. The residue was purified by a sequence of flash column chromatography on silica gel with methyl *tert*-butyl ether / cyclohexane = 1 : 10 as the eluent and Kugelrohr distillation (240 °C, 2 mbar) to afford the 4-silapiperidine product as a colorless viscous liquid (29.6 mg, 65% yield). **<sup>1</sup>H NMR** (500 MHz, CDCl<sub>3</sub>): δ 7.52 (d, *J* = 8.2 Hz, 4H), 7.41 (d, *J* = 8.2 Hz, 4H), 7.37 (d, *J* = 7.4 Hz, 2H), 7.33 (t, *J* = 7.3 Hz, 2H), 7.26 (t, *J* = 7.2 Hz, 1H), 3.62 (s, 2H), 2.85 (t, *J* = 6.2 Hz, 4H), 1.37 (t, *J* = 6.1 Hz, 4H), 1.35 (s, 18H) ppm. **<sup>13</sup>C NMR** (125 MHz, CDCl<sub>3</sub>): δ 152.3, 139.8, 134.7, 132.6, 128.9, 128.3, 126.9, 125.0, 62.7, 52.5, 34.8, 31.4, 11.6 ppm. **<sup>1</sup>H/<sup>29</sup>Si HMQC NMR** (500/99 MHz, CDCl<sub>3</sub>, 298 K, optimized for *J* = 7 Hz): δ 7.52/−16.8, 2.85/−16.8, 1.37/−16.8 ppm. **HRMS** (APCI): Calculated for C<sub>31</sub>H<sub>42</sub>NSi<sup>+</sup> [M+H]<sup>+</sup>: 456.3087; Found: 456.3071. **IR** (ATR):  $\tilde{\nu}$  3066, 2959, 2797, 1598, 1458, 1387, 1267, 1136, 1086, 970, 866, 820, 724.

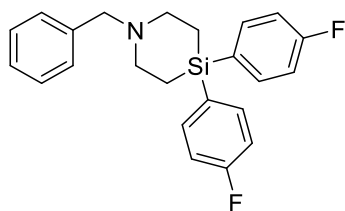

**1-Benzyl-4,4-bis(4-fluorophenyl)-1,4-azasilinane (3ad).** The general procedure was followed with *N*-benzyl-*N*-ethylethanamine (**1a**, 16.3 mg, 0.100 mmol), bis(4-fluorophenyl)silane (**2d**, 44.1 mg, 0.200 mmol), *p*-xylene (0.800 mL), Me<sub>3</sub>SiOTf (7.20 μL, 40.0 μmol) and B(C<sub>6</sub>F<sub>5</sub>)<sub>3</sub> (10.2 mg, 20.0 μmol) at 150 °C for 2 h. The residue was purified by a sequence of flash column chromatography on silica gel with methyl *tert*-butyl ether / cyclohexane = 1 : 10 as the eluent and Kugelrohr distillation (220 °C, 2 mbar) to afford the 4-silapiperidine product as a colorless viscous liquid (25.5 mg, 67% yield). **<sup>1</sup>H NMR** (500 MHz, CDCl<sub>3</sub>): δ 7.52 – 7.48 (m, 4H), 7.36 – 7.30 (m, 4H), 7.27 – 7.24 (m, 1H), 7.10 – 7.05 (m, 4H),

3.59 (s, 2H), 2.81 (t,  $J = 6.3$  Hz, 4H), 1.34 (t,  $J = 6.1$  Hz, 4H) ppm.  $^{13}\text{C}$  NMR (125 MHz,  $\text{CDCl}_3$ ):  $\delta$  164.1 (d,  $J = 248.8$  Hz), 139.4, 136.7 (d,  $J = 7.3$  Hz), 131.2, 128.9, 128.3, 127.1, 115.4 (d,  $J = 19.8$  Hz), 62.9, 52.3, 11.8 ppm.  $^{19}\text{F}$  NMR (471 MHz,  $\text{CDCl}_3$ ):  $\delta$  -111.1 ppm.  $^1\text{H}/^{29}\text{Si}$  HMQC NMR (500/99 MHz,  $\text{CDCl}_3$ , 298 K, optimized for  $J = 7$  Hz):  $\delta$  7.52 – 7.48/–15.0, 2.81/–15.0, 1.34/–15.0 ppm. HRMS (APCI): Calculated for  $\text{C}_{23}\text{H}_{24}\text{F}_2\text{NSi}^+$   $[\text{M}+\text{H}]^+$ : 380.1646; Found: 380.1635. IR (ATR):  $\tilde{\nu}$  3026, 2922, 2797, 1585, 1497, 1388, 1230, 1161, 1105, 971, 867, 821, 728.

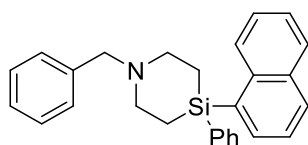

**1-Benzyl-4-(naphthalen-1-yl)-4-phenyl-1,4-azasilinane (3ae).** The general procedure was followed with *N*-benzyl-*N*-ethylethanamine (**1a**, 16.3 mg, 0.100 mmol), naphthalen-1-yl(phenyl)silane (**2e**, 46.9 mg, 0.200 mmol), *p*-xylene (0.800 mL),  $\text{Me}_3\text{SiOTf}$  (7.20  $\mu\text{L}$ , 40.0  $\mu\text{mol}$ ) and  $\text{B}(\text{C}_6\text{F}_5)_3$  (10.2 mg, 20.0  $\mu\text{mol}$ ) at 150  $^\circ\text{C}$  for 2 h. The residue was purified by a sequence of flash column chromatography on silica gel with methyl *tert*-butyl ether / cyclohexane = 1 : 10 as the eluent and Kugelrohr distillation (230  $^\circ\text{C}$ , 2 mbar) to afford the 4-silapiperidine product as a colorless viscous liquid (26.8 mg, 68% yield).  $^1\text{H}$  NMR (500 MHz,  $\text{CDCl}_3$ ):  $\delta$  7.97 (d,  $J = 8.4$  Hz, 1H), 7.93 (d,  $J = 8.2$  Hz, 1H), 7.88 (d,  $J = 8.2$  Hz, 1H), 7.81 (dd,  $J = 6.8, 1.2$  Hz, 1H), 7.60 (dd,  $J = 7.7, 1.5$  Hz, 2H), 7.53 (dd,  $J = 8.2, 6.9$  Hz, 1H), 7.47 – 7.44 (m, 1H), 7.39 – 7.31 (m, 8H), 7.27 – 7.24 (m, 1H), 3.63 (s, 2H), 2.95 – 2.85 (m, 4H), 1.65 – 1.54 (m, 4H) ppm.  $^{13}\text{C}$  NMR (125 MHz,  $\text{CDCl}_3$ ):  $\delta$  139.6, 137.3, 136.9, 135.2, 134.8, 133.7, 133.5, 130.5, 129.4, 129.1, 128.9, 128.6, 128.3, 128.1, 127.0, 125.9, 125.6, 125.2, 62.9, 52.6, 12.6 ppm.  $^1\text{H}/^{29}\text{Si}$  HMQC NMR (500/99 MHz,  $\text{CDCl}_3$ , 298 K, optimized for  $J = 7$  Hz):  $\delta$  7.81/–15.8, 7.60/–15.8, 2.95 – 2.85/–15.8, 1.65 – 1.54/–15.8, ppm. HRMS (APCI): Calculated for  $\text{C}_{27}\text{H}_{28}\text{NSi}^+$   $[\text{M}+\text{H}]^+$ : 394.1991; Found: 394.1978. IR (ATR):  $\tilde{\nu}$  2923, 2895, 2796, 2759, 1426, 1389, 1317, 1226, 1106, 969, 905, 867, 795, 776, 723, 696.

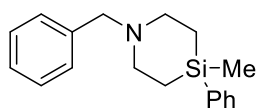

**1-Benzyl-4-methyl-4-phenyl-1,4-azasilinane (3ag).** The general procedure was followed with *N*-benzyl-*N*-ethylethanamine (**1a**, 16.3 mg, 0.100 mmol), methyl(phenyl)silane (**2g**, 24.4 mg, 0.200 mmol), *p*-xylene (0.800 mL),  $\text{Me}_3\text{SiOTf}$  (7.20  $\mu\text{L}$ , 40.0  $\mu\text{mol}$ ) and  $\text{B}(\text{C}_6\text{F}_5)_3$  (10.2 mg,

20.0  $\mu\text{mol}$ ) at 150  $^{\circ}\text{C}$  for 2 h. The residue was purified by a sequence of flash column chromatography on silica gel with methyl *tert*-butyl ether / cyclohexane = 1 : 10 as the eluent and Kugelrohr distillation (180  $^{\circ}\text{C}$ , 2 mbar) to afford the 4-silapiperidine product as a colorless viscous liquid (11.3 mg, 40% yield).  **$^1\text{H}$  NMR** (500 MHz,  $\text{CDCl}_3$ ):  $\delta$  7.57 – 7.56 (m, 2H), 7.38 – 7.31 (m, 7H), 7.27 – 7.24 (m, 1H), 3.62 (s, 2H), 2.87 – 2.82 (m, 2H), 2.79 – 2.74 (m, 2H), 1.21 – 1.16 (m, 2H), 0.99 – 0.96 (m, 2H), 0.32 (s, 3H) ppm.  **$^{13}\text{C}$  NMR** (125 MHz,  $\text{CDCl}_3$ ):  $\delta$  139.1, 138.1, 134.0, 129.3, 129.1, 128.3, 128.0, 127.0, 62.8, 52.5, 12.6, –4.0 ppm.  **$^1\text{H}/^{29}\text{Si}$  HMQC NMR** (500/99 MHz,  $\text{CDCl}_3$ , 298 K, optimized for  $J = 7$  Hz):  $\delta$  7.57 – 7.56/–11.5, 2.87 – 2.82/–11.5, 1.21 – 1.16/–11.5, 0.99 – 0.96/–11.5, 0.32/–11.5, ppm. **HRMS** (APCI): Calculated for  $\text{C}_{18}\text{H}_{24}\text{NSi}^+$   $[\text{M}+\text{H}]^+$ : 282.1678; Found: 282.1673. **IR** (ATR):  $\tilde{\nu}$  2919, 2794, 2756, 1391, 1250, 1110, 972, 868, 788, 730, 697.

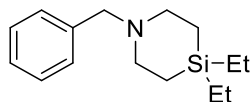

**1-Benzyl-4,4-diethyl-1,4-azasilinane (3ai)**. The general procedure was followed with *N*-benzyl-*N*-ethylethanamine (**1a**, 16.3 mg, 0.100 mmol), diethylsilane (**2i**, 17.6 mg, 0.200 mmol), *p*-xylene (0.800 mL),  $\text{Me}_3\text{SiOTf}$  (7.20  $\mu\text{L}$ , 40.0  $\mu\text{mol}$ ) and  $\text{B}(\text{C}_6\text{F}_5)_3$  (10.2 mg, 20.0  $\mu\text{mol}$ ) at 150  $^{\circ}\text{C}$  for 2 h. The residue was purified by a sequence of flash column chromatography on silica gel with methyl *tert*-butyl ether / cyclohexane = 1 : 10 as the eluent and Kugelrohr distillation (140  $^{\circ}\text{C}$ , 2 mbar) to afford the 4-silapiperidine product as a colorless viscous liquid (10.5 mg, 42% yield).  **$^1\text{H}$  NMR** (500 MHz,  $\text{CDCl}_3$ ):  $\delta$  7.35 – 7.30 (m, 4H), 7.26 – 7.23 (m, 1H), 3.60 (s, 2H), 2.73 (t,  $J = 6.3$  Hz, 4H), 0.96 (t,  $J = 8.0$  Hz, 6H), 0.79 (t,  $J = 6.4$  Hz, 4H), 0.57 (t,  $J = 8.0$  Hz, 4H) ppm.  **$^{13}\text{C}$  NMR** (125 MHz,  $\text{CDCl}_3$ ):  $\delta$  138.9, 129.2, 128.3, 127.1, 62.7, 52.6, 9.9, 7.4, 3.7 ppm.  **$^1\text{H}/^{29}\text{Si}$  HMQC NMR** (500/99 MHz,  $\text{CDCl}_3$ , 298 K, optimized for  $J = 7$  Hz):  $\delta$  2.73/–3.1, 0.96/–3.1, 0.79/–3.1, 0.57/–3.1, ppm. **HRMS** (APCI): Calculated for  $\text{C}_{15}\text{H}_{26}\text{NSi}^+$   $[\text{M}+\text{H}]^+$ : 248.1835; Found: 248.1831. **IR** (ATR):  $\tilde{\nu}$  2950, 2910, 2794, 1465, 1391, 1230, 1010, 976, 865, 730, 697.

### 3.3 Unsuccessful Substrates

Further investigation of the substrate scope revealed that tertiary benzylamines having two isopropyl, cyclohexyl, isobutyl, or phenethyl groups as well as 1-benzylazepane failed to furnish the corresponding 4-silapiperidine derivative.

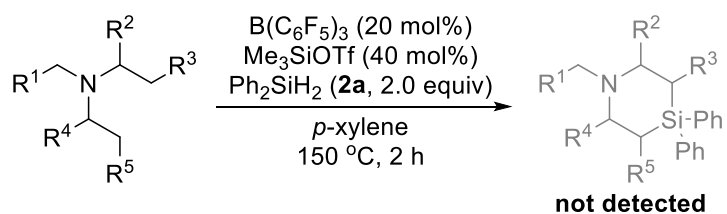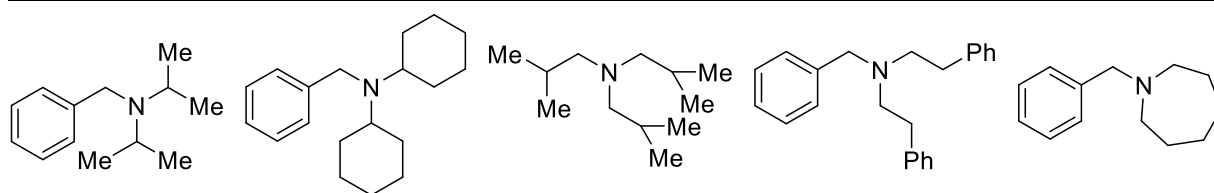

## 4 Scale-Up Experiment

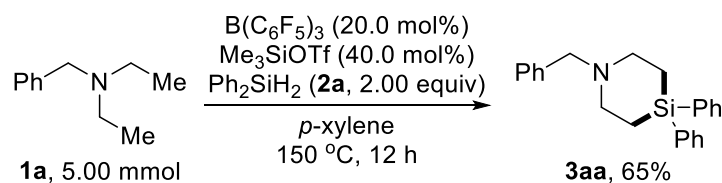

In a nitrogen-filled glovebox, a 50-mL single-neck round bottom flask equipped with a magnetic stir bar was charged with *N*-benzyl-*N*-ethylethanamine (**1a**, 0.820 g, 5.00 mmol),  $\text{Ph}_2\text{SiH}_2$  (**2a**, 1.84 g, 10.0 mmol), *p*-xylene (20.0 mL),  $\text{Me}_3\text{SiOTf}$  (362  $\mu\text{L}$ , 2.00 mmol) and  $\text{B}(\text{C}_6\text{F}_5)_3$  (512 mg, 1.00 mmol). The single-neck round bottom flask was fitted with a cap, and the reaction was then removed from the glovebox. After a condenser was attached to the flask, the mixture was stirred at 150 °C for 12 h in a preheated oil bath with a continuous flow of nitrogen gas. After the resulting reaction mixture was cooled to room temperature, NaOH (20.0 mL, 10% aq.) was added and the mixture stirred for 30 min. The mixture was extracted with methyl *tert*-butyl ether (20 mL $\times$ 3). The combined organic layers were washed with brine (15 mL), dried over  $\text{Na}_2\text{SO}_4$ , and the solvent was removed under reduced pressure. The residue was purified by a sequence of flash column chromatography on silica gel with methyl *tert*-butyl ether : cyclohexane = 1 : 10 as the eluent and Kugelrohr distillation (200 °C, 2 mbar) to afford **3aa** as a colorless viscous liquid (1.12 g, 65% yield).



## 5 Elaboration of an *N*-Benzylated 4-Silapiperidine

### 5.1 Debenzylation of Product **3aa**<sup>[11]</sup>

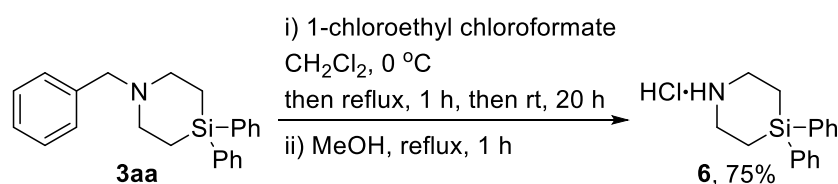

A flame-dried 50-mL two-neck flask equipped with a magnetic stir bar and a reflux condenser was charged with **3aa** (0.340 g, 1.00 mmol) and  $\text{CH}_2\text{Cl}_2$  (15 mL) under an atmosphere of nitrogen. Then, 1-chloroethyl chloroformate (0.135 mL, 1.25 mmol) was added dropwise at  $0\text{ }^\circ\text{C}$  within 5 min. The mixture was heated at reflux for 1 h and was then stirred at room temperature for a further 20 h. After that, the solvent was removed under reduced pressure. The resulting oily residue was dissolved in MeOH (10 mL), and the mixture was heated at reflux for 1 h. After the reaction mixture was cooled to room temperature, the solvent was removed under reduced pressure to give viscous oil which was triturated with diethyl ether to obtain the product **6** as a white solid (217 mg, 75% yield). **<sup>1</sup>H NMR** (500 MHz,  $\text{CDCl}_3$ ):  $\delta$  9.63 (br, 2H), 7.56 – 7.55 (m, 4H), 7.46 – 7.38 (m, 6H), 3.44 (t,  $J = 6.2$  Hz, 4H), 1.74 (t,  $J = 6.3$  Hz, 4H) ppm. **<sup>13</sup>C NMR** (125 MHz,  $\text{CDCl}_3$ ):  $\delta$  134.8, 132.0, 130.5, 128.6, 44.3, 9.1 ppm. **<sup>1</sup>H/<sup>29</sup>Si HMQC NMR** (500/99 MHz,  $\text{CDCl}_3$ , 298 K, optimized for  $J = 7$  Hz):  $\delta$  7.56 – 7.55/–16.5, 3.44/–16.5, 1.74/–16.5 ppm. Spectral data is in agreement with published data.<sup>[12]</sup>

### 5.2 Oxidation of Product **3aa**<sup>[13]</sup>

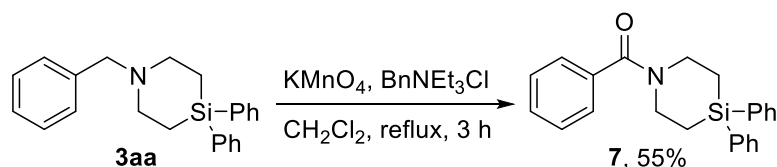

A flame-dried 50-mL two-neck flask equipped with a magnetic stir bar and a reflux condenser was charged with **3aa** (0.340 g, 1.00 mmol) and  $\text{CH}_2\text{Cl}_2$  (20 mL) under an atmosphere of nitrogen. Then benzyltriethylammoniumchlorid (0.680 g, 3.00 mmol) and  $\text{KMnO}_4$  (0.470 g, 3.00 mmol) was added, and the reaction mixture was heated at reflux for 3 h. After the reaction mixture was cooled to room temperature, the suspension was quenched by aq. sodium thiosulphate and filtered. The resulting solution was extracted with  $\text{CH}_2\text{Cl}_2$  (20 mL $\times$ 3),

and the combined organic layers were washed with brine (15 mL), dried over Na<sub>2</sub>SO<sub>4</sub>, and the solvent was removed under reduced pressure. The product was purified by flash column chromatography on silica gel with methyl *tert*-butyl ether : cyclohexane = 1 : 3 as the eluent to afford **7** as a white solid (197 mg, 55% yield). **<sup>1</sup>H NMR** (500 MHz, CDCl<sub>3</sub>): δ 7.56 – 7.54 (m, 4H), 7.45 – 7.38 (m, 11H), 4.00 (br, 2H), 3.64 (br, 2H), 1.56 (br, 2H), 1.27 (br, 2H) ppm. **<sup>13</sup>C NMR** (125 MHz, CDCl<sub>3</sub>): δ 171.1, 136.9, 134.6, 134.5, 130.0, 129.4, 128.5, 128.3, 126.5, 47.1, 42.0, 13.0, 11.3 ppm. **<sup>1</sup>H/<sup>29</sup>Si HMQC NMR** (500/99 MHz, CDCl<sub>3</sub>, 298 K, optimized for *J* = 7 Hz): δ 7.56 – 7.54/–14.2 ppm. **HRMS** (APCI): Calculated for C<sub>23</sub>H<sub>24</sub>NOSi<sup>+</sup> [M+H]<sup>+</sup>: 358.1627; Found: 358.1618. **IR** (ATR):  $\tilde{\nu}$  2927, 2894, 1626, 1426, 1296, 1112, 969, 831, 731, 701.

## 6 Mechanistic Investigations

### 6.1 $^2\text{H}$ -Labeling Experiments

#### 6.1.1 Reaction of **1a** with $\text{Ph}_2\text{SiD}_2$ (**2a-d<sub>2</sub>**) Under Standard Conditions

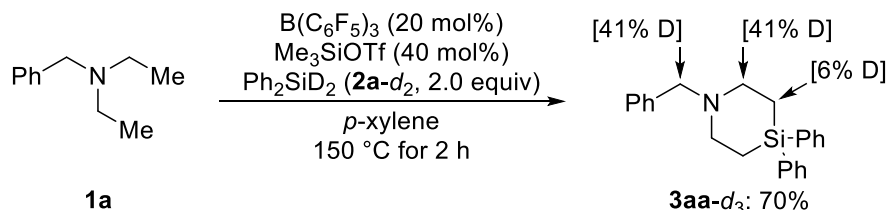

In a nitrogen-filled glovebox, a 10-mL sealed tube equipped with a magnetic stir bar was charged with *N*-benzyl-*N*-ethylethanamine (**1a**, 16.3 mg, 0.100 mmol),  $\text{Ph}_2\text{SiH}_2$  (**2a-d<sub>2</sub>**, 37.2 mg, 0.200 mmol), *p*-xylene (0.800 mL),  $\text{Me}_3\text{SiOTf}$  (7.20  $\mu\text{L}$ , 40.0  $\mu\text{mol}$ ), and  $\text{B}(\text{C}_6\text{F}_5)_3$  (10.2 mg, 20.0  $\mu\text{mol}$ ). The sealed tube was fitted with a cap, and the reaction stirred at 150 °C for 2 h in a preheated oil bath. After the resulting reaction mixture was cooled to room temperature, NaOH (5.00 mL, 10% aq.) was added and the mixture stirred for 30 min. The mixture was extracted with methyl *tert*-butyl ether (20 mL $\times$ 3). The combined organic layers were washed with brine (15 mL), dried over  $\text{Na}_2\text{SO}_4$ , and the solvent was removed under reduced pressure. The residue was purified by a sequence of flash column chromatography on silica gel with methyl *tert*-butyl ether : cyclohexane = 1 : 10 as the eluent and Kugelrohr distillation (200 °C, 2 mbar) to afford **3aa-d<sub>3</sub>** as a colorless viscous liquid (24.2 mg, 70% yield). Deuterium incorporation: 2.70 D/molecule ( $^1\text{H}$  NMR).  $^1\text{H}$  NMR (500 MHz,  $\text{CDCl}_3$ ):  $\delta$  7.57 – 7.56 (m, 4H), 7.42 – 7.31 (m, 10H), 7.27 – 7.24 (m, 1H), 3.60 (d,  $J$  = 13.8 Hz, 1.18H, 41%D), 2.89 – 2.78 (m, 2.36H, 41%D), 1.40 – 1.35 (m, 3.74H, 6%D) ppm.  $^{13}\text{C}$  NMR (125 MHz,  $\text{CDCl}_3$ ):  $\delta$  139.4, 135.9, 134.8, 129.5, 129.0, 128.3, 128.1, 127.0, 62.7 – 62.2 (m), 52.4 – 51.8 (m), 11.2 (t,  $J$  = 16.1 Hz) ppm.  $^1\text{H}/^{29}\text{Si}$  HMQC NMR (500/99 MHz,  $\text{CDCl}_3$ , 298 K, optimized for  $J$  = 7 Hz):  $\delta$  7.57 – 7.56/–15.8, 2.89 – 2.78/–15.8, 1.40 – 1.35/–15.8 ppm. HRMS (APCI): Calculated for  $\text{C}_{23}\text{H}_{23}\text{D}_3\text{NSi}^+$   $[\text{M}+\text{H}]^+$ : 347.2023; Found: 347.2009. IR (ATR):  $\tilde{\nu}$  3064, 3021, 2919, 2786, 1491, 1427, 1214, 1110, 962, 874, 698.

**Table S1.** Ratio of different deuterated products **3aa-d<sub>n</sub>** (n = 0~6) determined by mass spectroscopy.

| <b>3aa-d<sub>n</sub></b> | Compared to each other in %(intensity : sum of all intensity * 100%) |
|--------------------------|----------------------------------------------------------------------|
| <b>3aa</b>               | 2                                                                    |
| <b>3aa-d<sub>1</sub></b> | 10                                                                   |
| <b>3aa-d<sub>2</sub></b> | 22                                                                   |
| <b>3aa-d<sub>3</sub></b> | 28                                                                   |
| <b>3aa-d<sub>4</sub></b> | 22                                                                   |
| <b>3aa-d<sub>5</sub></b> | 11                                                                   |
| <b>3aa-d<sub>6</sub></b> | 1                                                                    |

The overall deuteration grades of **3aa-d<sub>3</sub>** determined by mass spectrometry is 2.87 D.

### 6.1.2 Reaction of **1v** with Ph<sub>2</sub>SiD<sub>2</sub> (**2a-d<sub>2</sub>**) Under Standard Conditions

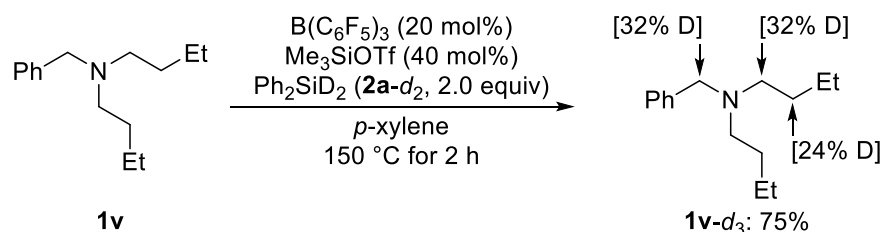

In a nitrogen-filled glovebox, a 10-mL sealed tube equipped with a magnetic stir bar was charged with *N*-benzyl-*N*-butylbutan-1-amine (**1v**, 21.9 mg, 0.100 mmol), Ph<sub>2</sub>SiH<sub>2</sub> (**2a-d<sub>2</sub>**, 37.2 mg, 0.200 mmol), *p*-xylene (0.800 mL), Me<sub>3</sub>SiOTf (7.20 μL, 40.0 μmol) and B(C<sub>6</sub>F<sub>5</sub>)<sub>3</sub> (10.2 mg, 20.0 μmol). The sealed tube was fitted with a cap, and the reaction stirred at 150 °C for 2 h in a preheated oil bath. After the resulting reaction mixture was cooled to room temperature, NaOH (5.00 mL, 10% aq.) was added and the mixture stirred for 30 min. The mixture was extracted with methyl *tert*-butyl ether (20 mL×3). The combined organic layers were washed with brine (15 mL), dried over Na<sub>2</sub>SO<sub>4</sub>, and the solvent was removed under reduced pressure. The residue was purified by a sequence of flash column chromatography on silica gel with methyl *tert*-butyl ether : cyclohexane = 1 : 5 as the eluent to afford **1v-d<sub>3</sub>** as a colorless liquid (16.8 mg, 75% yield). Deuterium incorporation: 2.85 D/molecule (<sup>1</sup>H NMR). <sup>1</sup>H NMR (500 MHz, CDCl<sub>3</sub>): δ 7.33 – 7.28 (m, 4H), 7.22 (t, *J* = 7.0 Hz, 1H), 3.58 – 3.50 (m, 1.37H, 32%D), 2.42 – 2.38 (m, 2.71H, 32%D), 1.48 – 1.42 (m, 4H), 1.33 – 1.26 (m, 3.06H, 24%D), 0.88 (t, *J* = 7.4 Hz, 6H) ppm. <sup>13</sup>C NMR (125 MHz, CDCl<sub>3</sub>): δ 140.2, 129.0, 128.2, 126.8, 58.7 – 58.2 (m), 53.6 – 53.1 (m), 29.3 – 29.0 (m), 20.7 – 20.2 (m), 14.2 – 14.0 (m) ppm. HRMS (APCI): Calculated for

$C_{15}H_{23}D_3N^+$   $[M+H]^+$ : 223.2254; Found: 223.2244. **IR** (ATR):  $\tilde{\nu}$  2955, 2928, 2869, 2795, 1453, 1376, 1170, 731, 697.

**Table S2.** Ratio of different deuterated products  $1\mathbf{v}-d_n$  ( $n = 0\sim 7$ ) determined by mass spectroscopy.

| $1\mathbf{v}-d_n$ | Compared to each other in %(intensity : sum of all intensity * 100%) |
|-------------------|----------------------------------------------------------------------|
| $1\mathbf{v}$     | 3                                                                    |
| $1\mathbf{v}-d_1$ | 12                                                                   |
| $1\mathbf{v}-d_2$ | 23                                                                   |
| $1\mathbf{v}-d_3$ | 27                                                                   |
| $1\mathbf{v}-d_4$ | 21                                                                   |
| $1\mathbf{v}-d_5$ | 10                                                                   |
| $1\mathbf{v}-d_6$ | 3                                                                    |
| $1\mathbf{v}-d_7$ | 1                                                                    |

The overall deuteration grades of  $1\mathbf{v}-d_3$  determined by mass spectrometry is 2.98 D.

## 6.2 Stoichiometric Experiments

### 6.2.1 Stoichiometric Reaction of **1a** and B(C<sub>6</sub>F<sub>5</sub>)<sub>3</sub> (1:1)

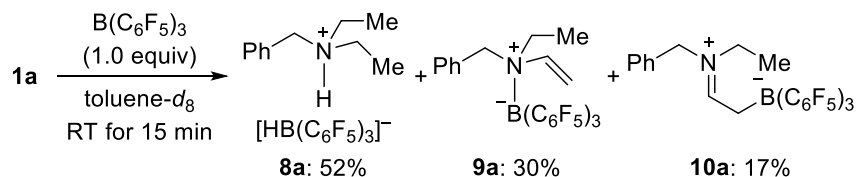

In a nitrogen-filled glovebox, a J-Young tube was charged with **1a** (8.20 mg, 0.0500 mmol), mesitylene (3.50  $\mu$ L, 0.0250 mmol), toluene-*d*<sub>8</sub> (0.5 mL), and B(C<sub>6</sub>F<sub>5</sub>)<sub>3</sub> (25.6 mg, 0.0500 mmol). After shaking 15 min at RT, the reaction mixture was analyzed by NMR spectroscopy (internal standard material: mesitylene, 3.50  $\mu$ L, 0.0250 mmol). *Crude NMR data of 8a*: <sup>11</sup>B NMR (161 MHz, toluene-*d*<sub>8</sub>; selected data of **8a**):  $\delta$  -23.8 (d, *J* = 81.2 Hz) ppm; <sup>19</sup>F NMR (471 MHz, toluene-*d*<sub>8</sub>; selected data of **8a**):  $\delta$  -133.8 (d, *J* = 30.0 Hz), -161.2 (t, *J* = 20.8 Hz), -165.4 – -165.5 (m) ppm. *Crude NMR data of 9a*: <sup>11</sup>B NMR (161 MHz, toluene-*d*<sub>8</sub>; selected data of **9a**):  $\delta$  -13.9 ppm; <sup>19</sup>F NMR (471 MHz, toluene-*d*<sub>8</sub>; selected data of **9a**):  $\delta$  -132.5 (d, *J* = 28.0 Hz), -159.4 (t, *J* = 21.4 Hz), -164.2 – -164.4 (m) ppm. *Crude NMR data of 10a*: <sup>11</sup>B NMR (161 MHz, toluene-*d*<sub>8</sub>; selected data of **10a**):  $\delta$  -13.5 ppm; <sup>19</sup>F NMR (471 MHz, toluene-*d*<sub>8</sub>; selected data of **10a**):  $\delta$  -132.1 (d, *J* = 28.6 Hz), -159.2 (t, *J* = 21.4 Hz), -164.1 – -164.2 (m) ppm.

### 6.2.2 Stoichiometric Reaction of **1a**, Me<sub>3</sub>SiOTf, and B(C<sub>6</sub>F<sub>5</sub>)<sub>3</sub> (1:1:1)

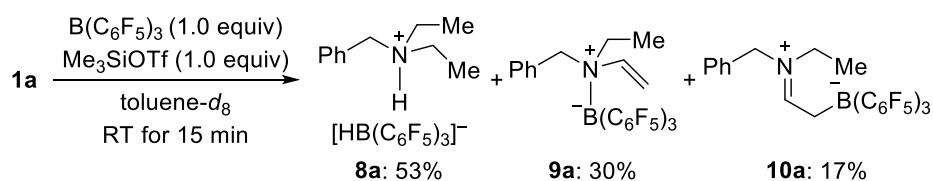

In a nitrogen-filled glovebox, a J-Young tube was charged with **1a** (8.20 mg, 0.0500 mmol), mesitylene (3.50  $\mu$ L, 0.0250 mmol), toluene-*d*<sub>8</sub> (0.5 mL), and B(C<sub>6</sub>F<sub>5</sub>)<sub>3</sub> (25.6 mg, 0.0500 mmol). After shaking 15 min at RT, the reaction mixture was analyzed by NMR spectroscopy (internal standard material: mesitylene, 3.50  $\mu$ L, 0.0250 mmol).

## 7 NMR Spectra

**Figure S1.**  $^1\text{H}$  NMR spectrum (500 MHz,  $\text{CDCl}_3$ , 298 K) of *N*-benzyl-*N*-ethylpropan-1-amine (**1r**).

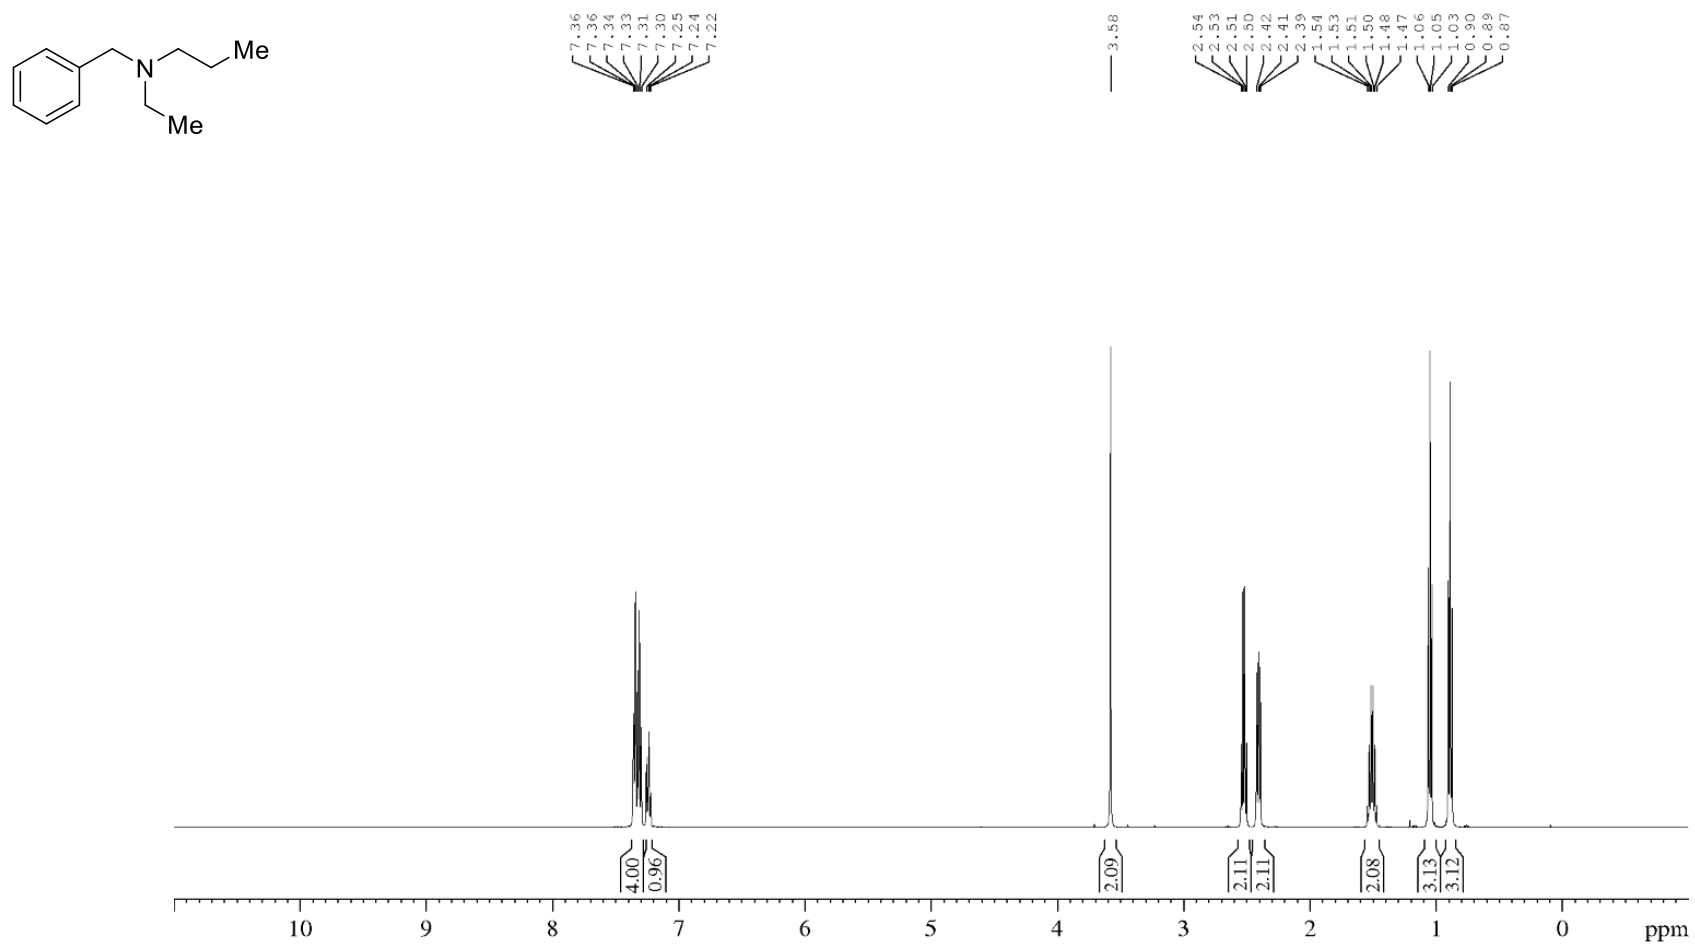

**Figure S2.**  $^{13}\text{C}$  NMR spectrum (125 MHz,  $\text{CDCl}_3$ , 298 K) of *N*-benzyl-*N*-ethylpropan-1-amine (**1r**).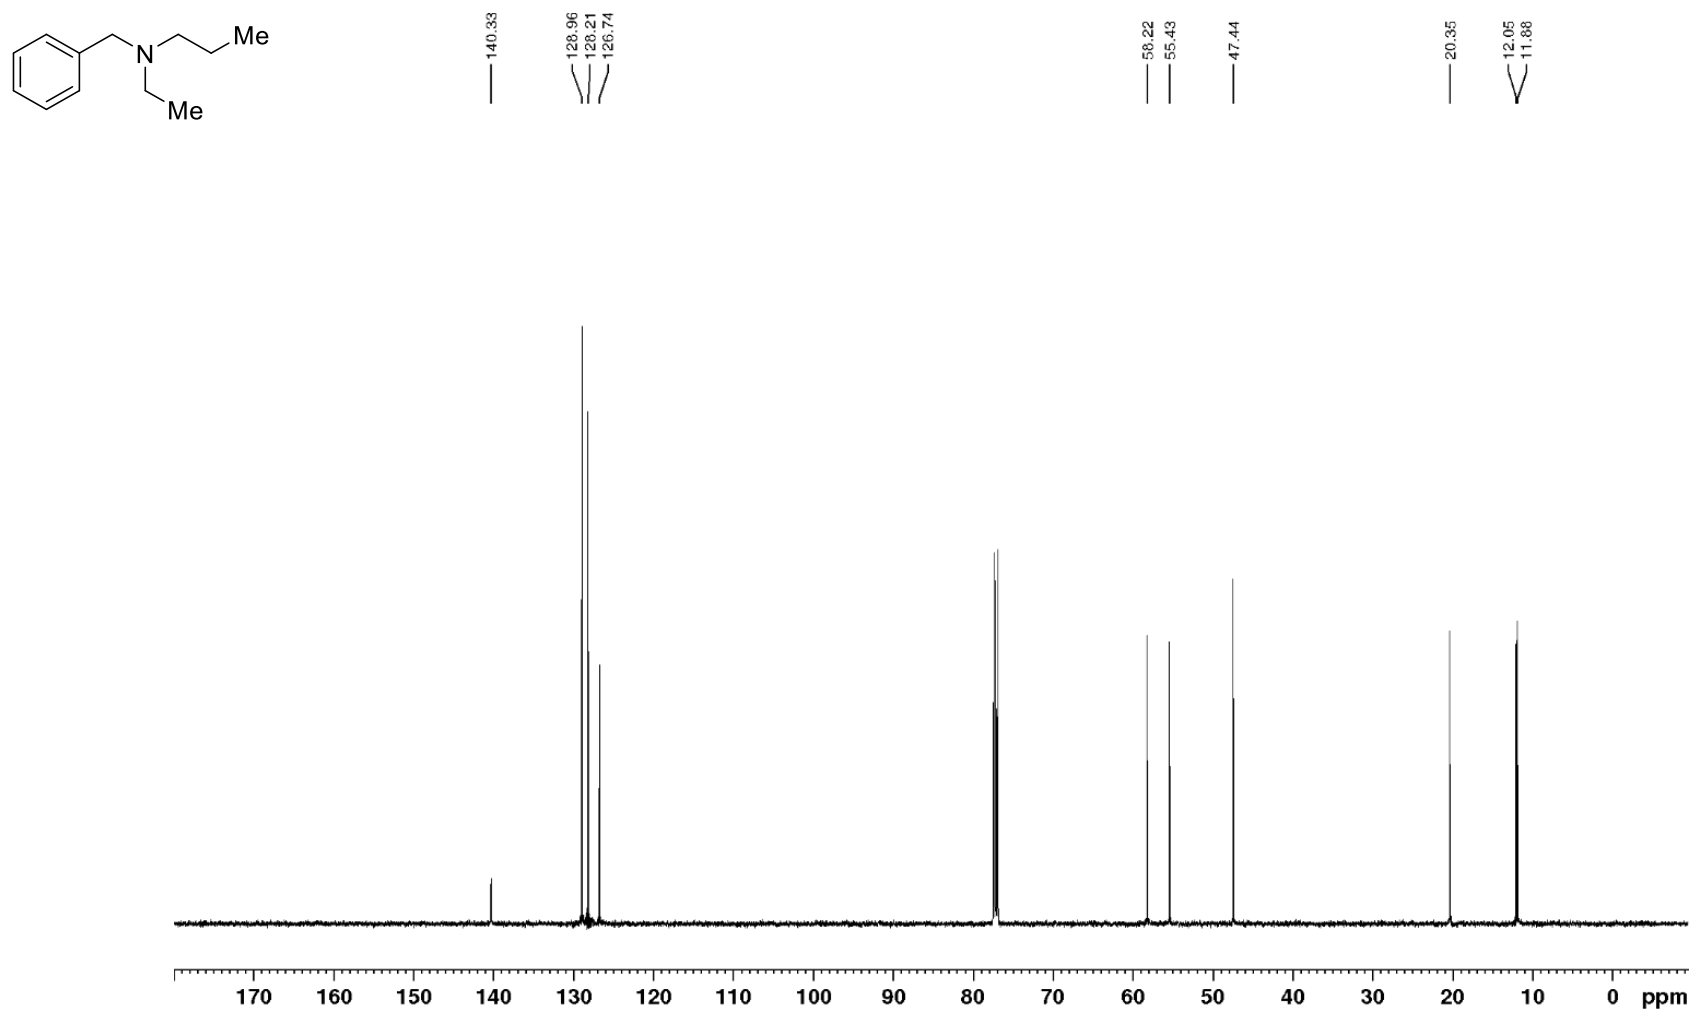



**Figure S3.**  $^1\text{H}$  NMR spectrum (500 MHz,  $\text{CDCl}_3$ , 298 K) of *N*-benzyl-*N*-ethylbutan-1-amine (**1s**).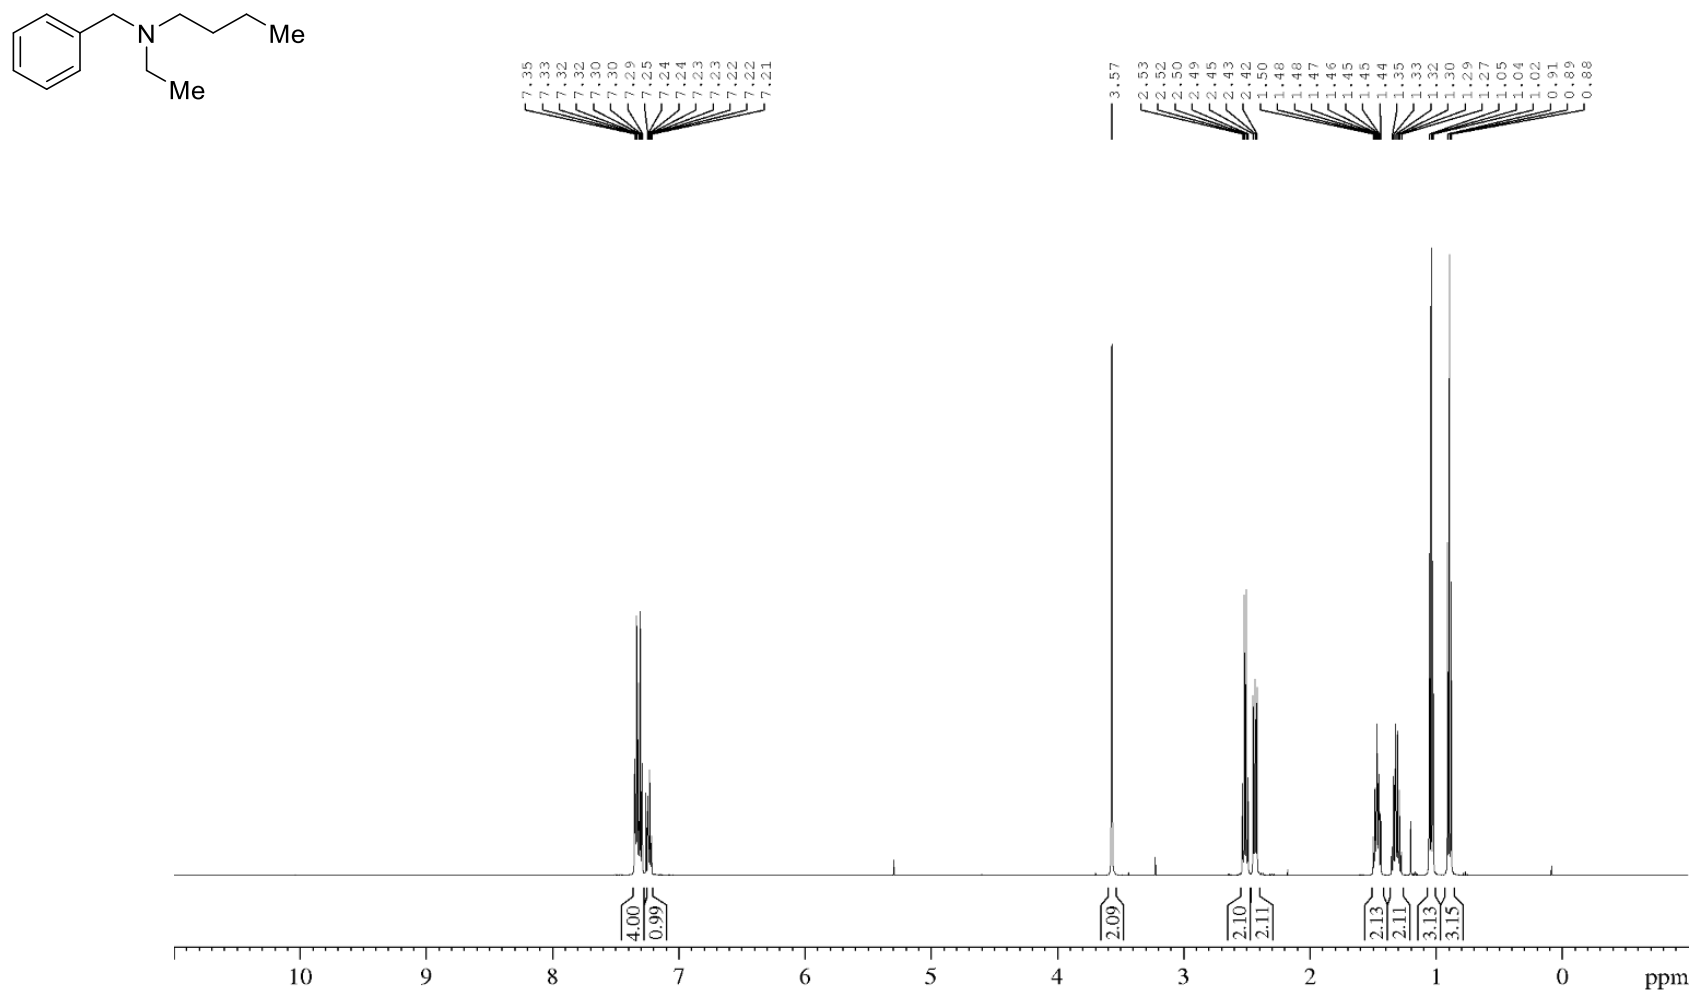

**Figure S4.**  $^{13}\text{C}$  NMR spectrum (125 MHz,  $\text{CDCl}_3$ , 298 K) of *N*-benzyl-*N*-ethylbutan-1-amine (**1s**).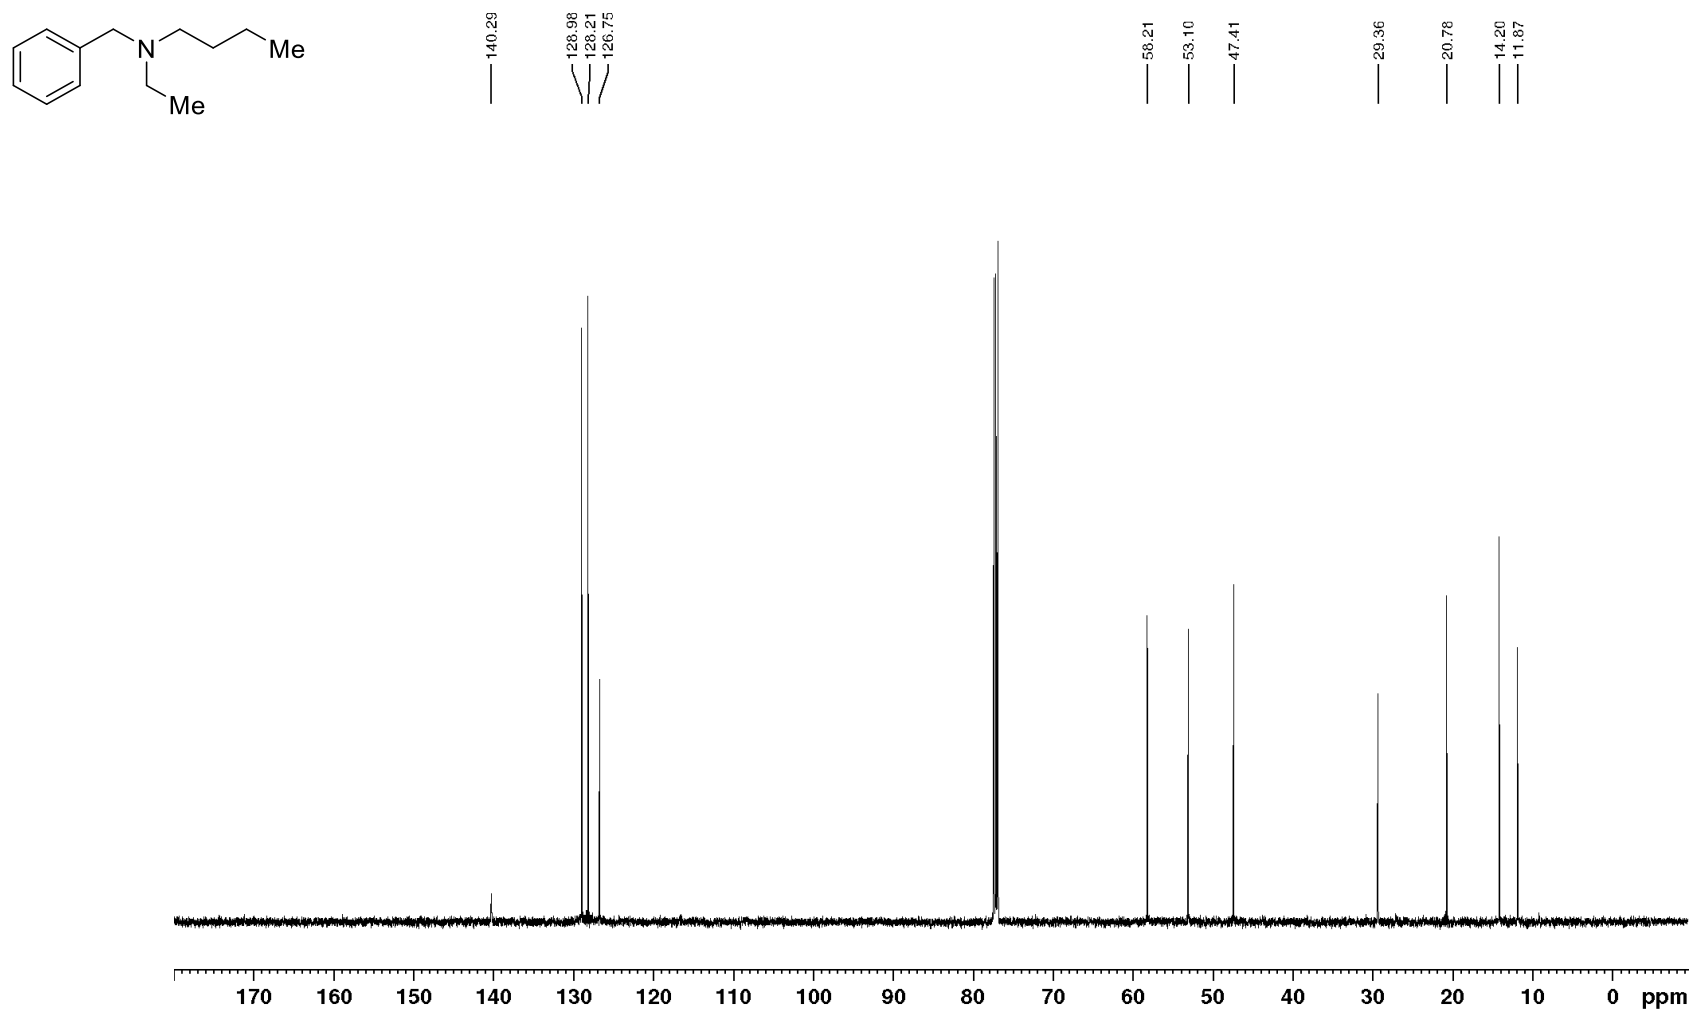

**Figure S5.**  $^1\text{H}$  NMR spectrum (500 MHz,  $\text{CDCl}_3$ , 298 K) of **1-benzyl-4,4-diphenyl-1,4-azasilinane (3aa)**.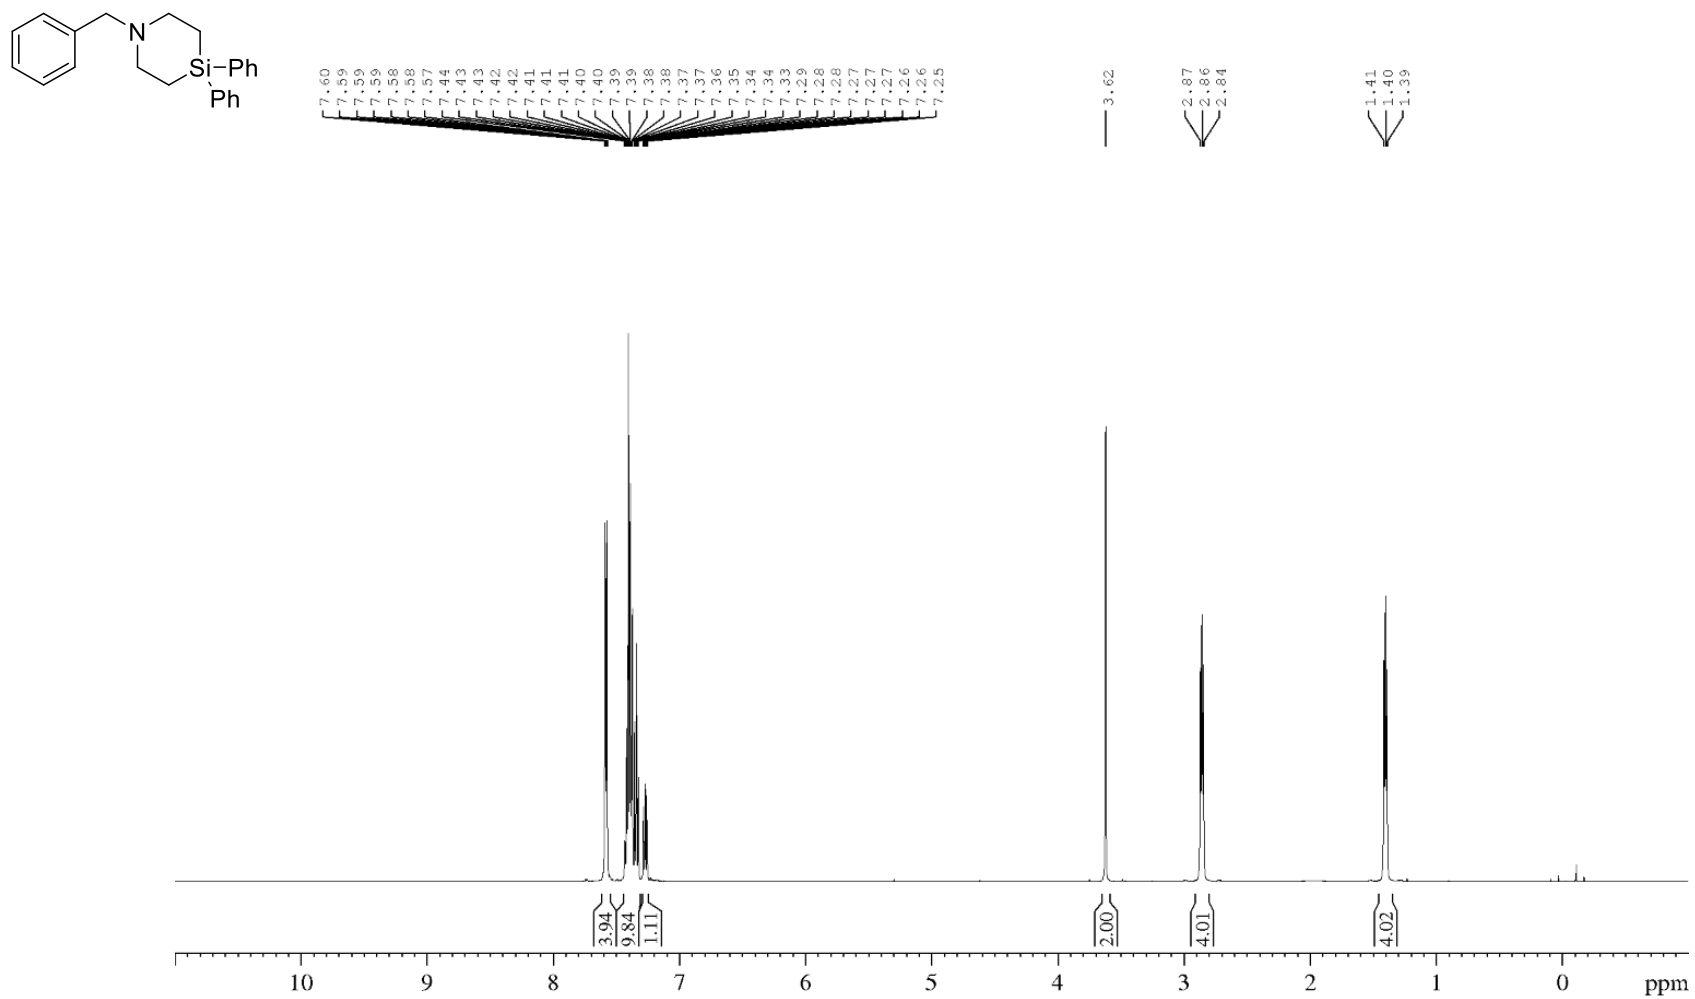

**Figure S6.**  $^{13}\text{C}$  NMR spectrum (125 MHz,  $\text{CDCl}_3$ , 298 K) of **1-benzyl-4,4-diphenyl-1,4-azasilinane (3aa)**.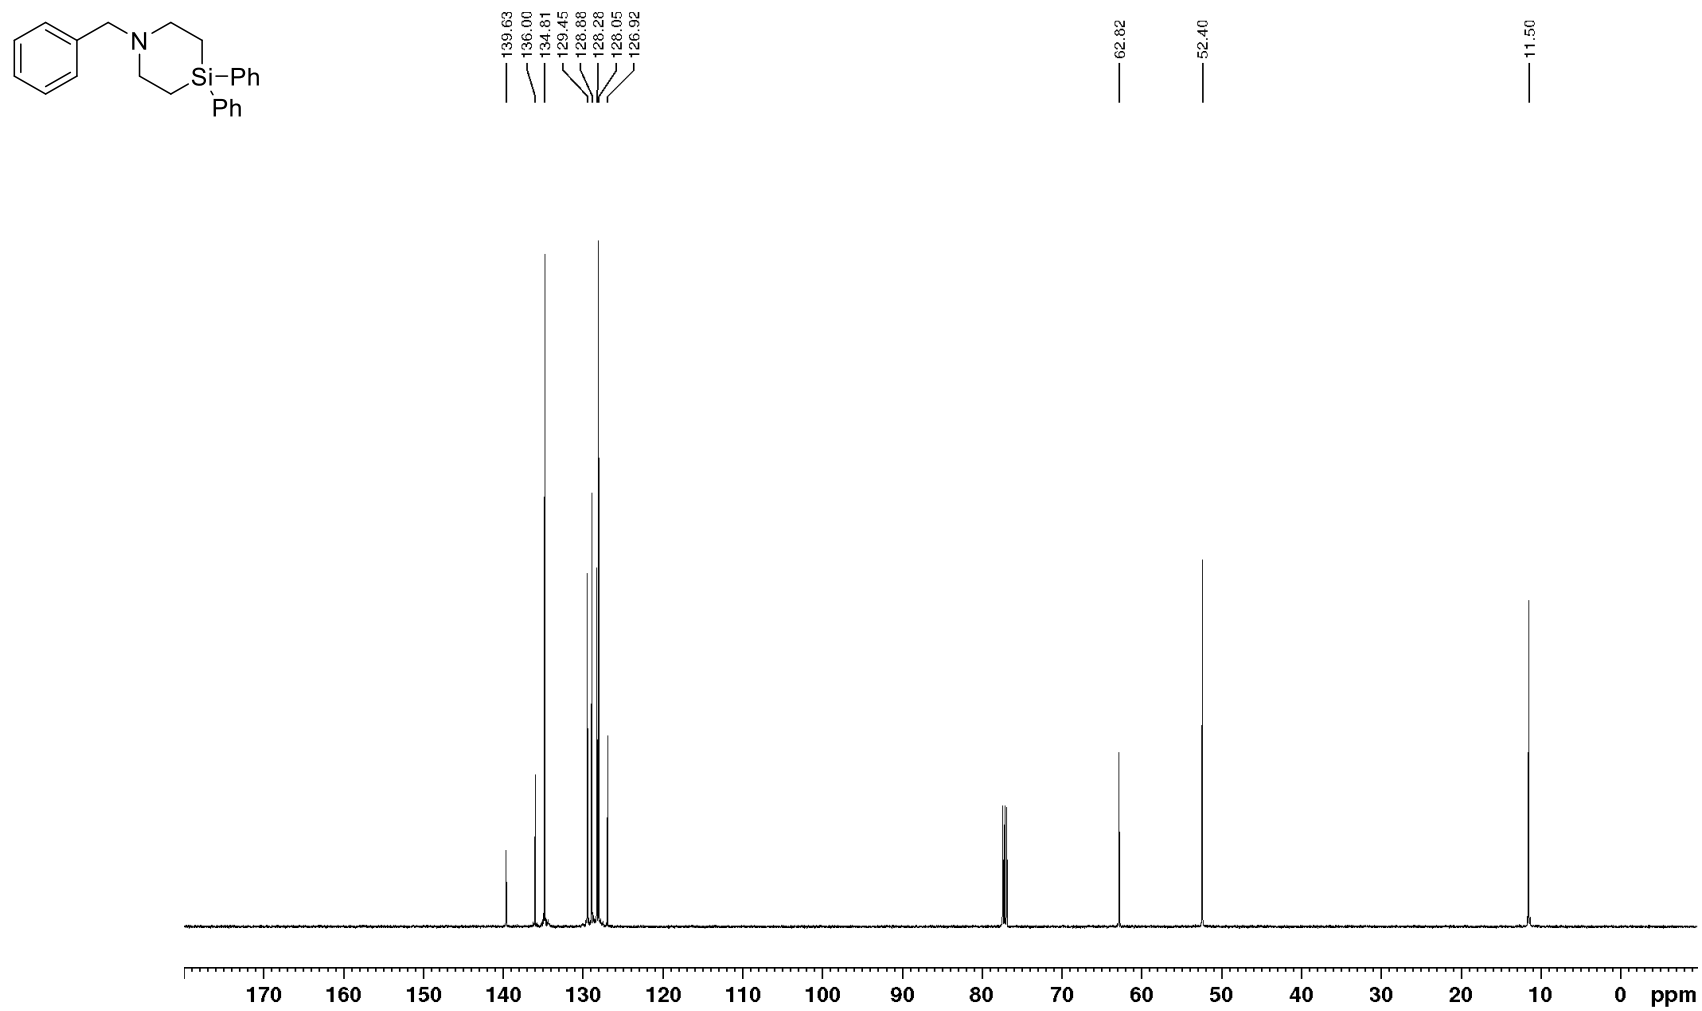

**Figure S7.**  $^1\text{H}/^{29}\text{Si}$  HMQC NMR (500/99 MHz,  $\text{CDCl}_3$ , 298 K, optimized for  $J = 7$  Hz) of **1-benzyl-4,4-diphenyl-1,4-azasilinane (3aa)**.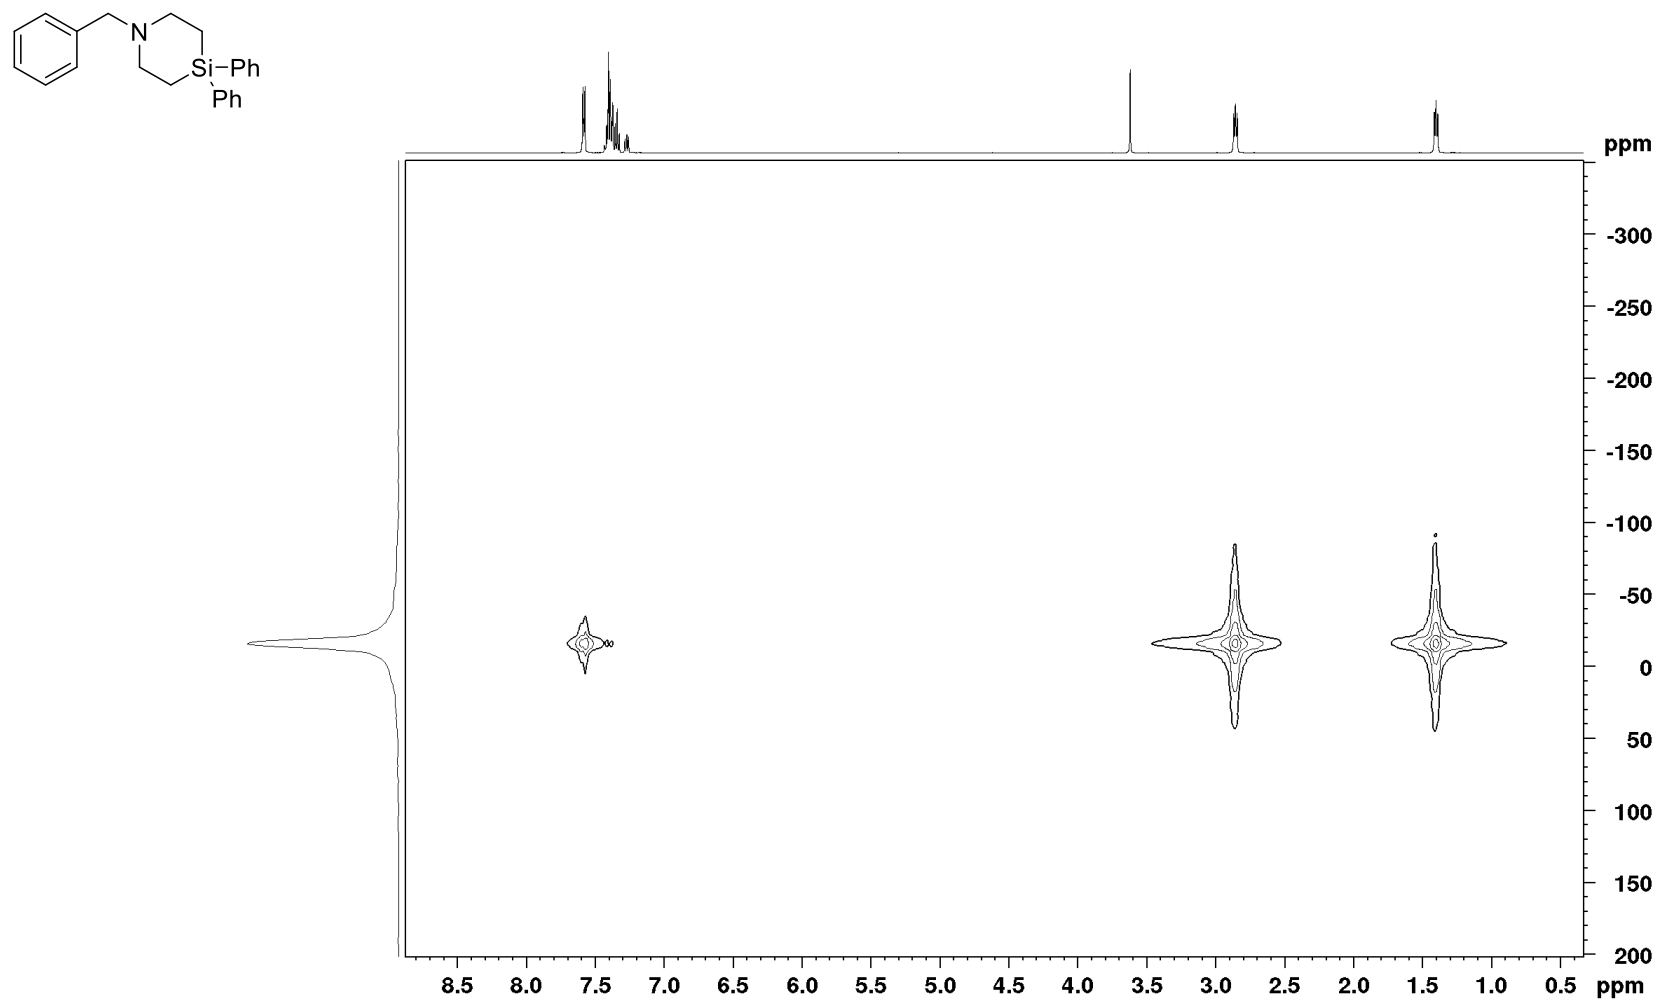

**Figure S8.**  $^1\text{H}$  NMR spectrum (500 MHz,  $\text{CDCl}_3$ , 298 K) of 1-([1,1'-biphenyl]-4-ylmethyl)-4,4-diphenyl-1,4-azasilinane (**3ba**).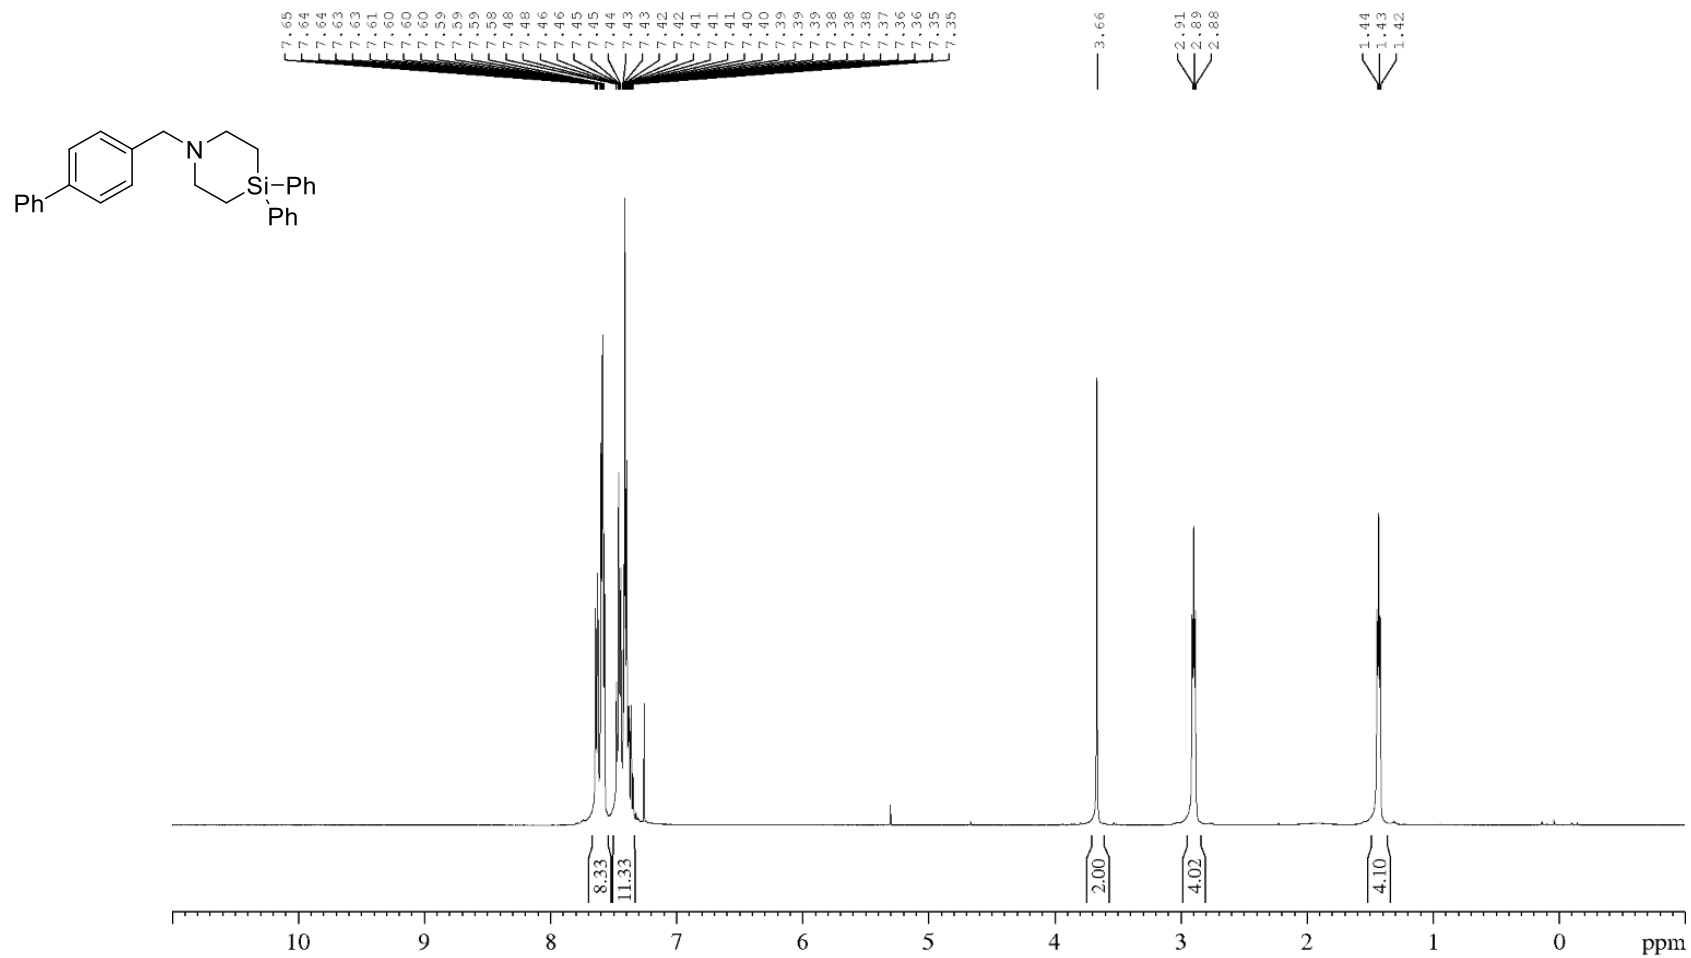

**Figure S9.**  $^{13}\text{C}$  NMR spectrum (125 MHz,  $\text{CDCl}_3$ , 298 K) of 1-([1,1'-biphenyl]-4-ylmethyl)-4,4-diphenyl-1,4-azasilinane (**3ba**).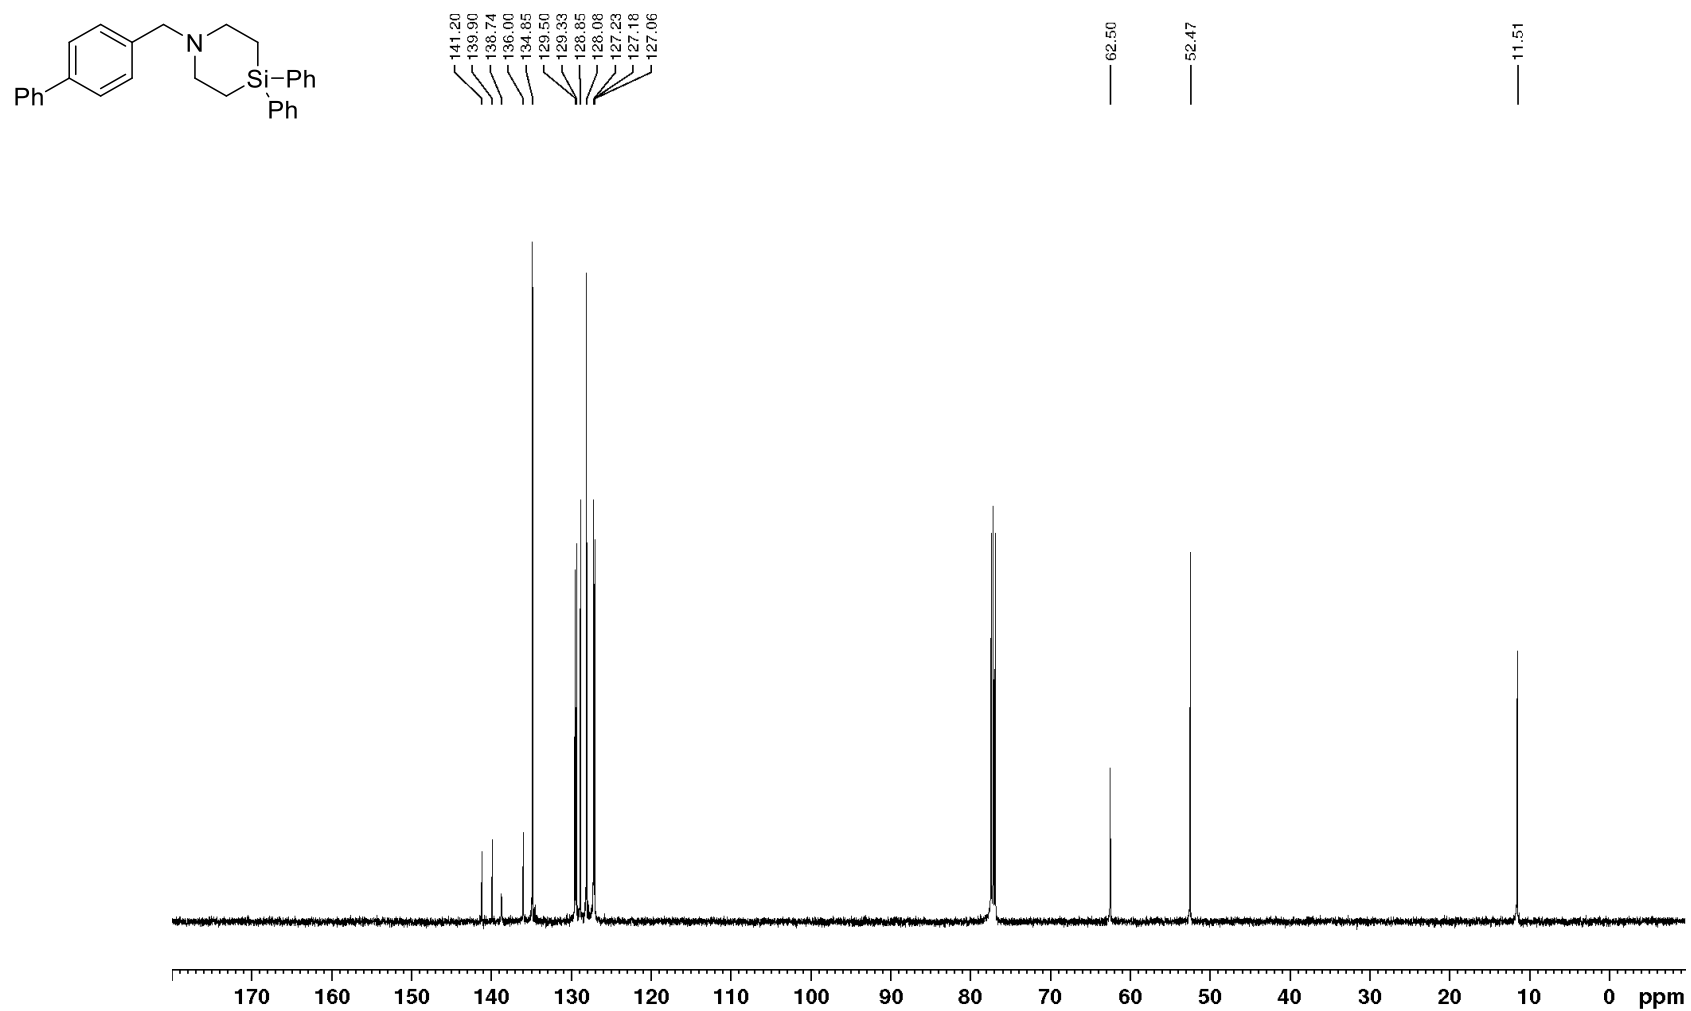

**Figure S10.**  $^1\text{H}/^{29}\text{Si}$  HMQC NMR (500/99 MHz,  $\text{CDCl}_3$ , 298 K, optimized for  $J = 7$  Hz) of **1-([1,1'-biphenyl]-4-ylmethyl)-4,4-diphenyl-1,4-azasilinane (3ba)**.

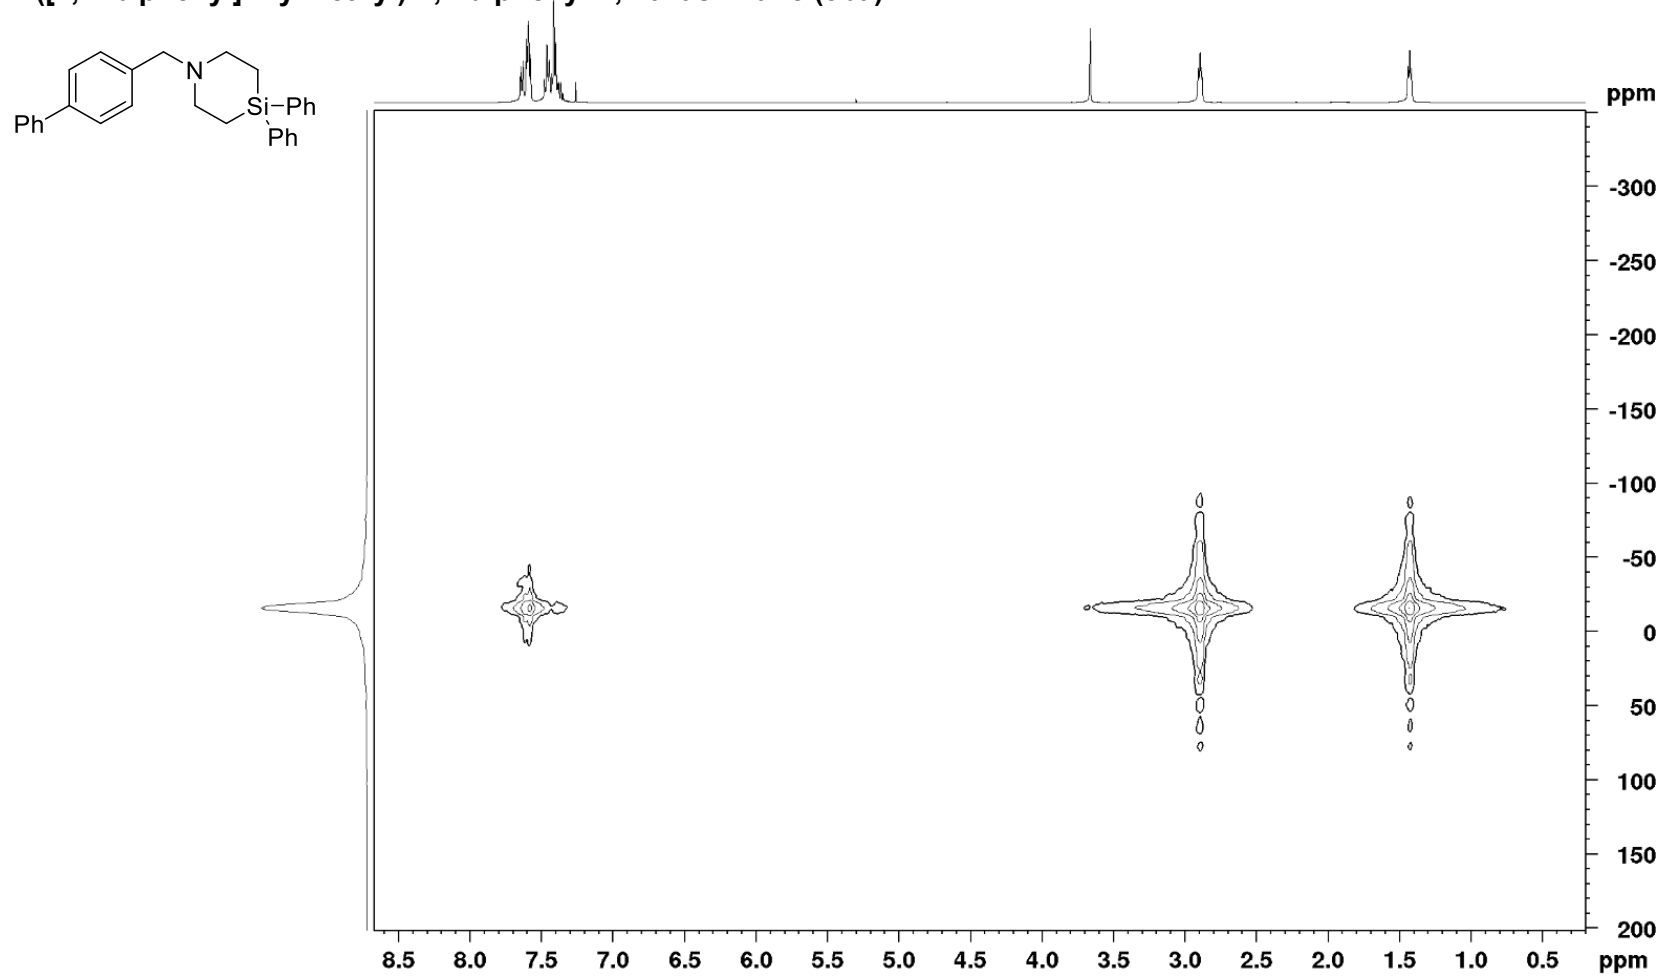



**Figure S11.**  $^1\text{H}$  NMR spectrum (500 MHz,  $\text{CDCl}_3$ , 298 K) of **1-(2-methylbenzyl)-4,4-diphenyl-1,4-azasilinane (3ca)**.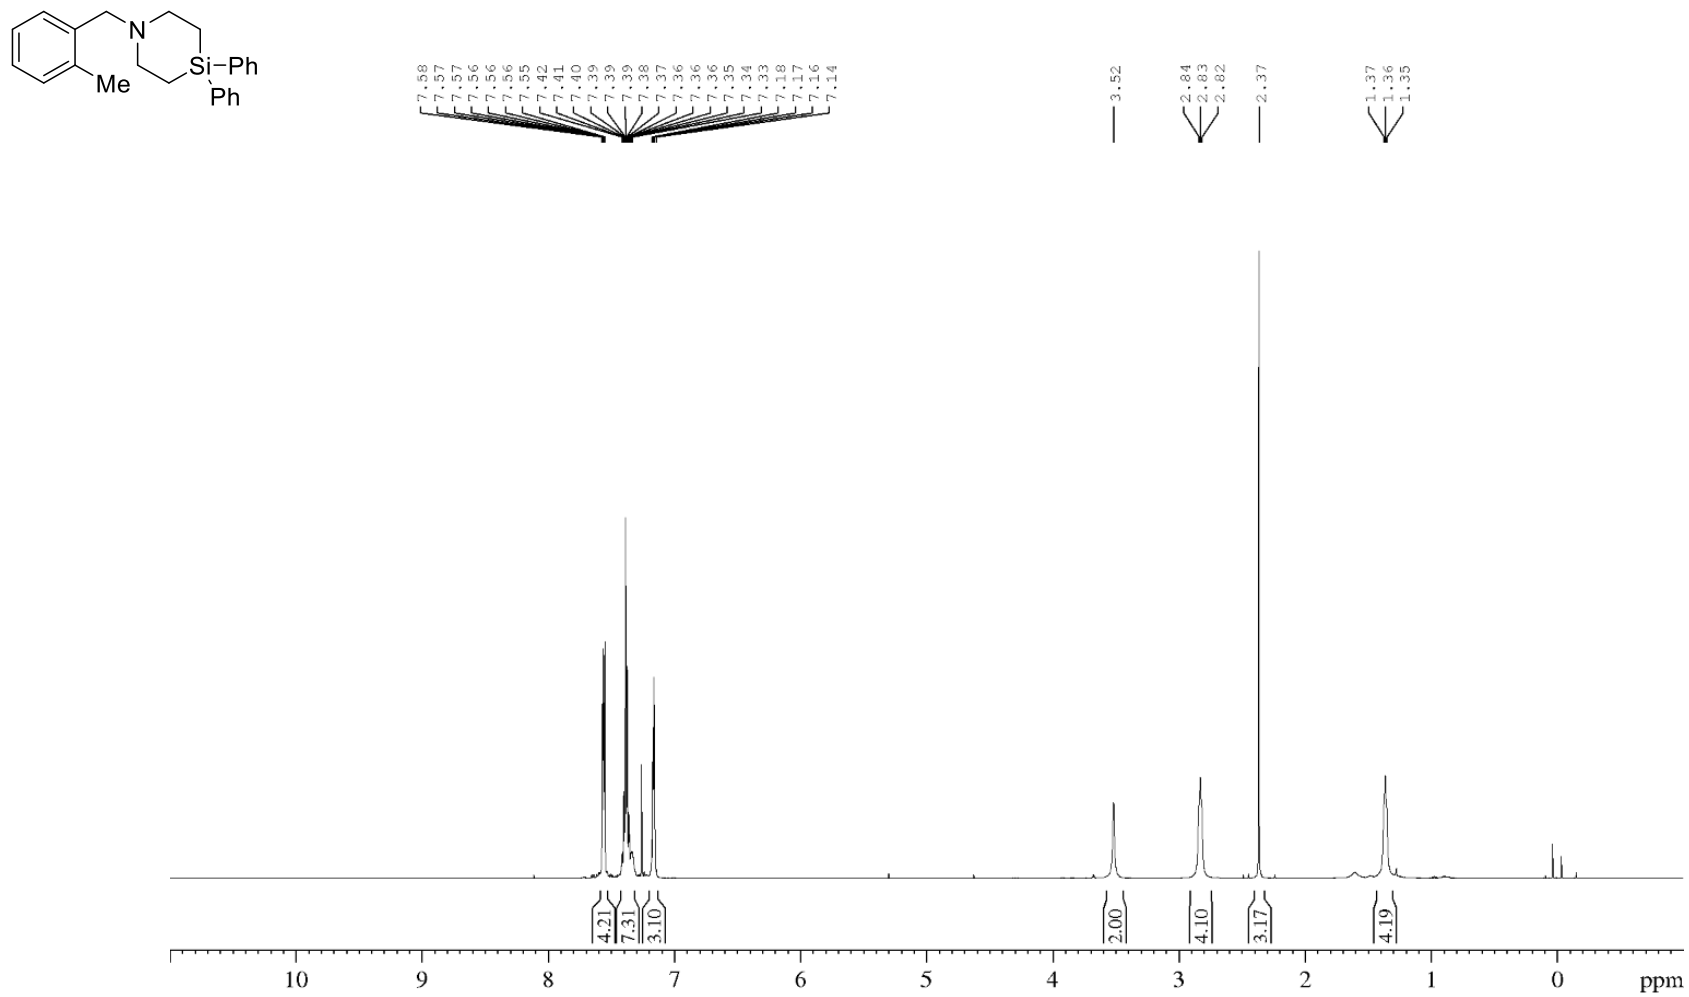

**Figure S12.**  $^{13}\text{C}$  NMR spectrum (125 MHz,  $\text{CDCl}_3$ , 298 K) of 1-(2-methylbenzyl)-4,4-diphenyl-1,4-azasilinane (**3ca**).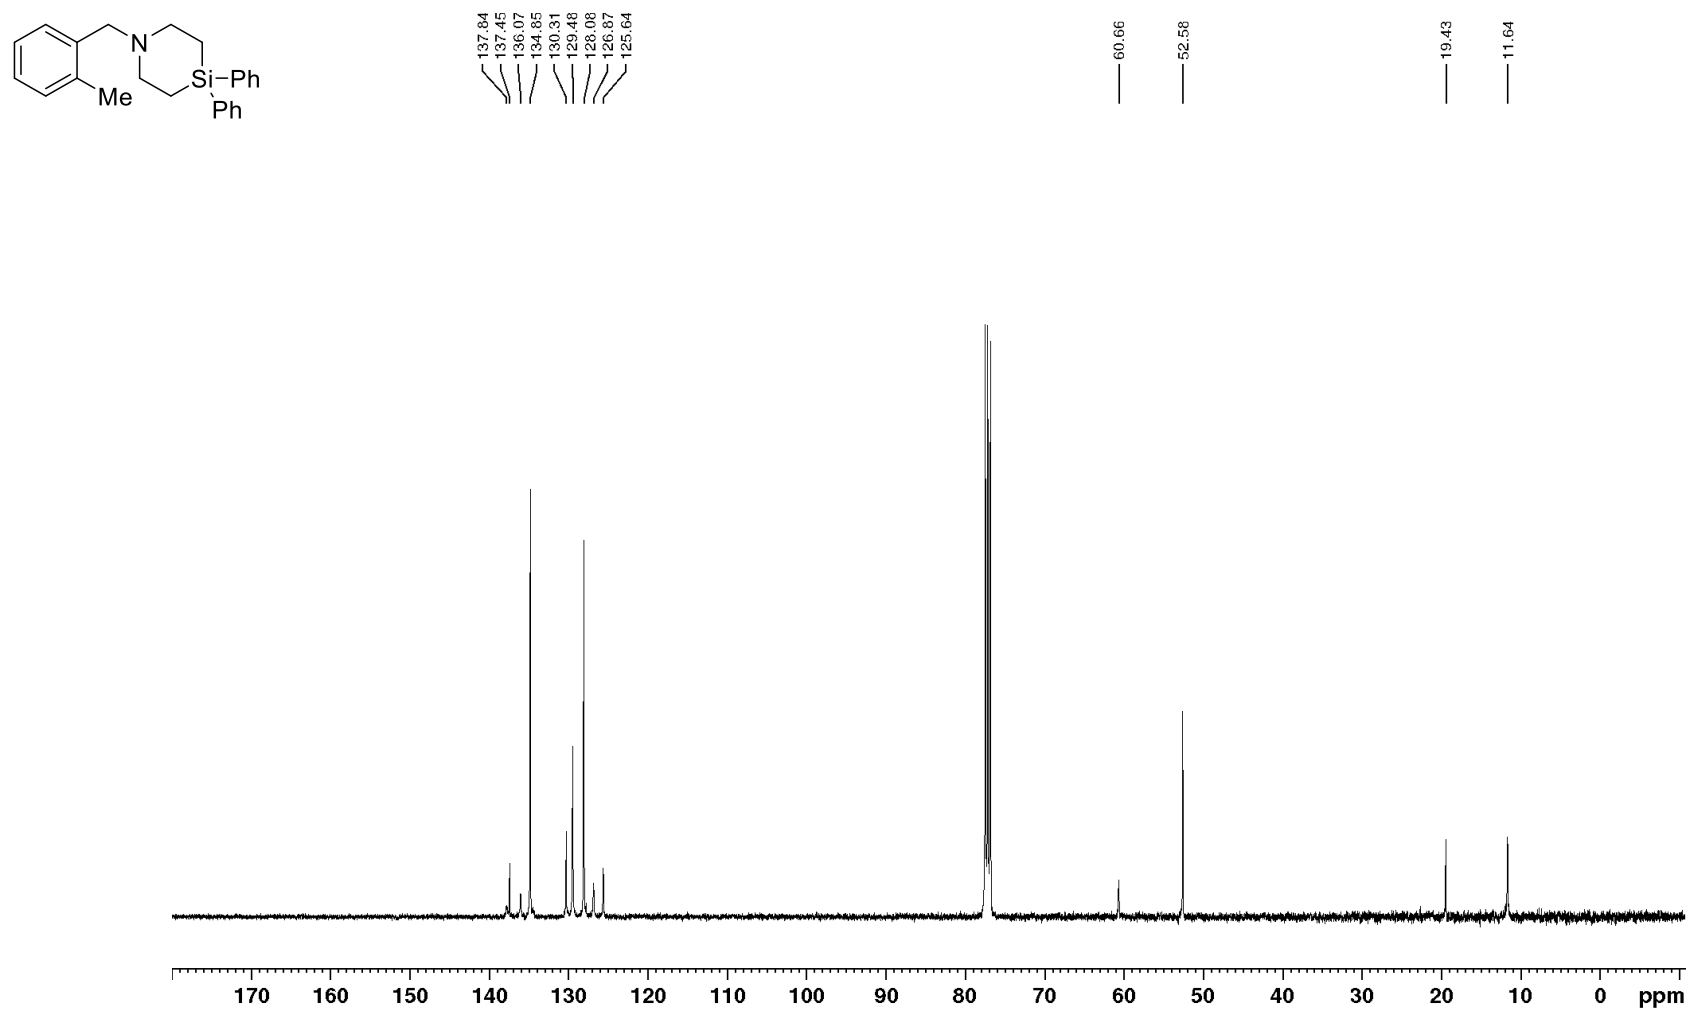

**Figure S13.**  $^1\text{H}/^{29}\text{Si}$  HMQC NMR (500/99 MHz,  $\text{CDCl}_3$ , 298 K, optimized for  $J = 7$  Hz) of **1-(2-methylbenzyl)-4,4-diphenyl-1,4-azasilinane (3ca)**.

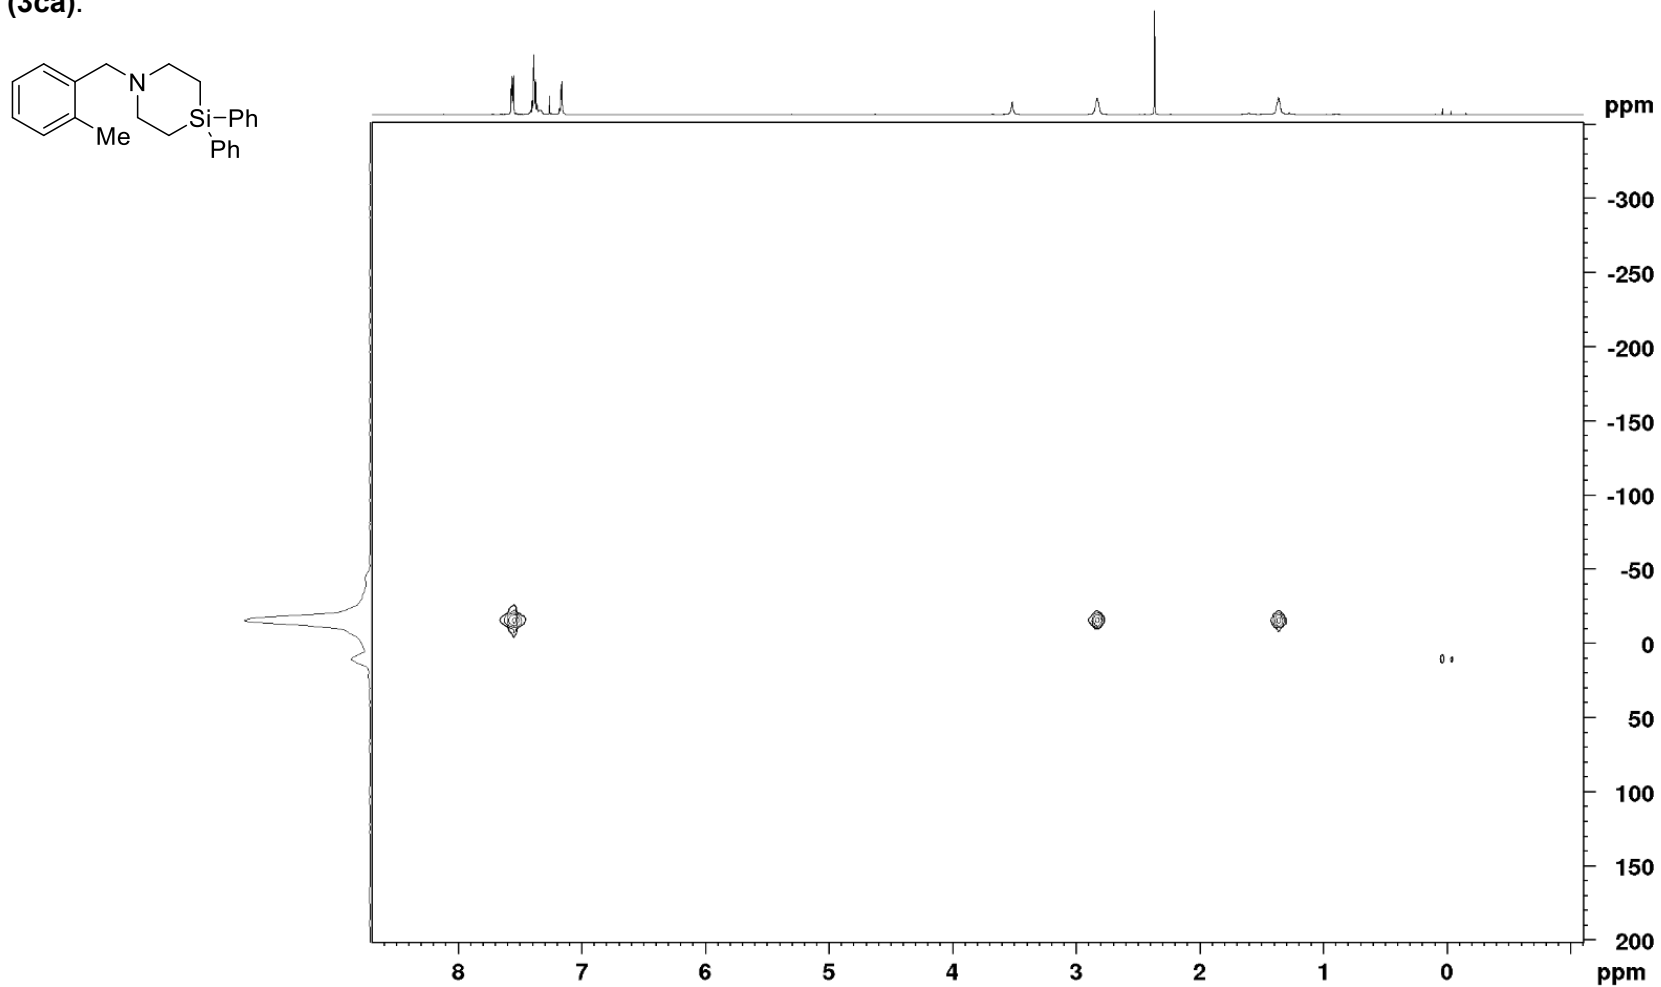

**Figure S14.**  $^1\text{H}$  NMR spectrum (500 MHz,  $\text{CDCl}_3$ , 298 K) of **1-(3-methylbenzyl)-4,4-diphenyl-1,4-azasilinane (3da)**.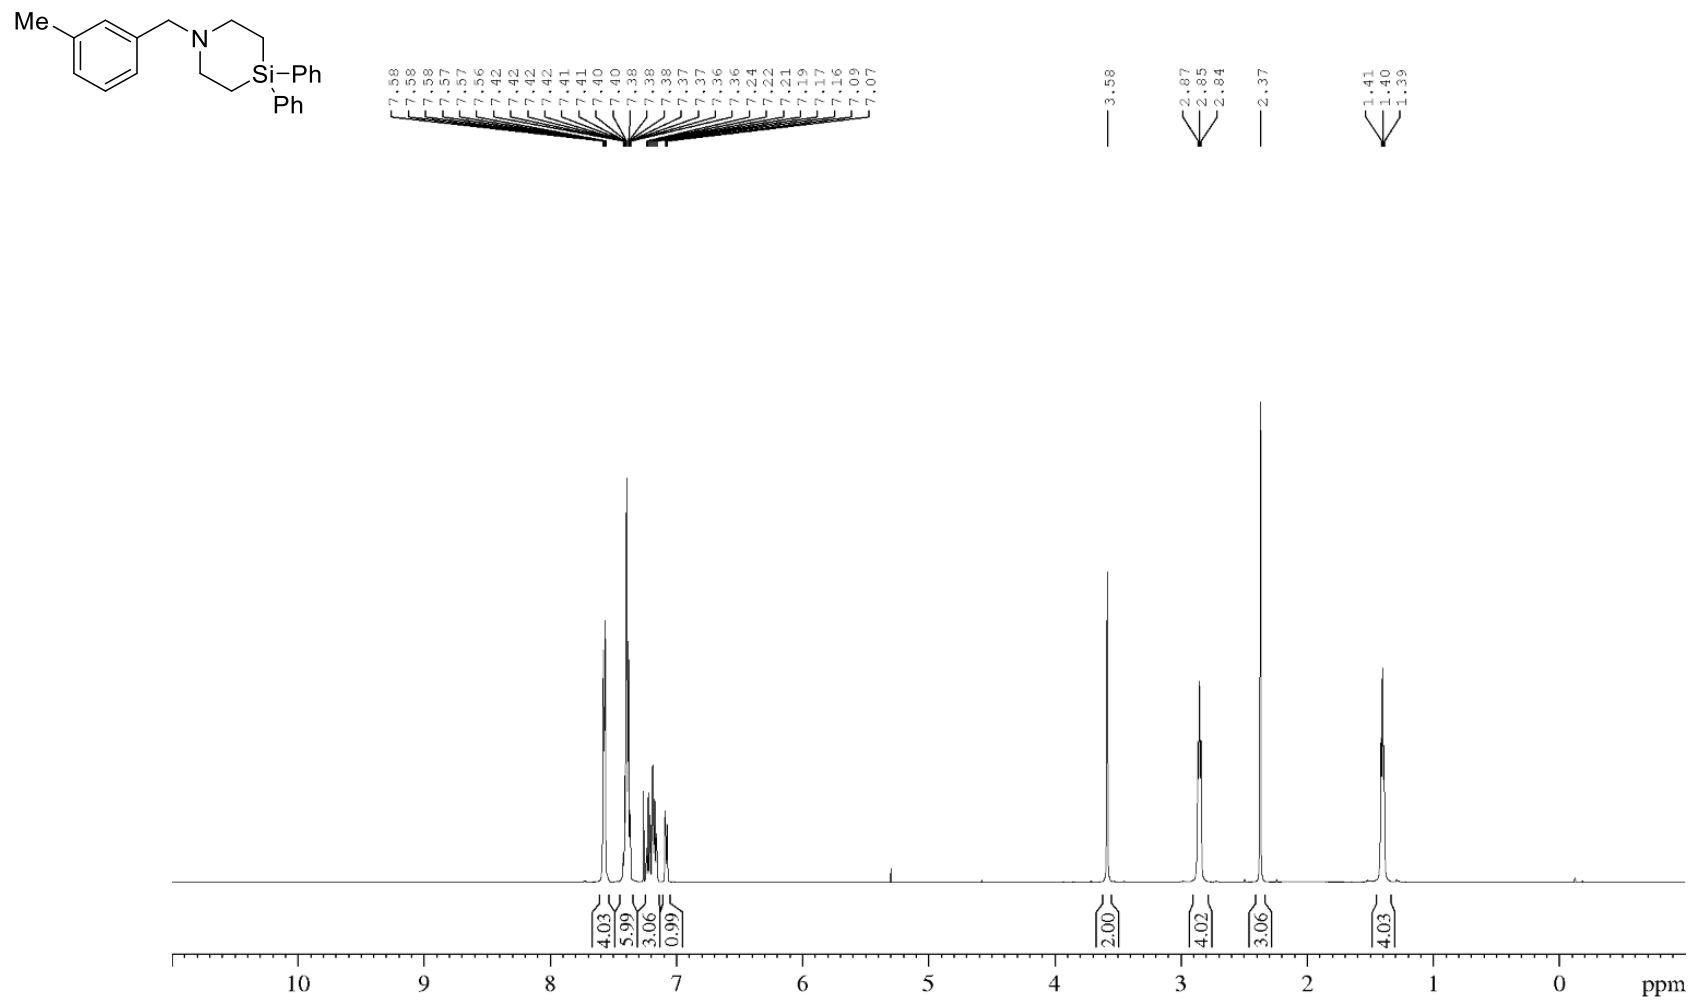

**Figure S15.**  $^{13}\text{C}$  NMR spectrum (125 MHz,  $\text{CDCl}_3$ , 298 K) of 1-(3-methylbenzyl)-4,4-diphenyl-1,4-azasilinane (**3da**).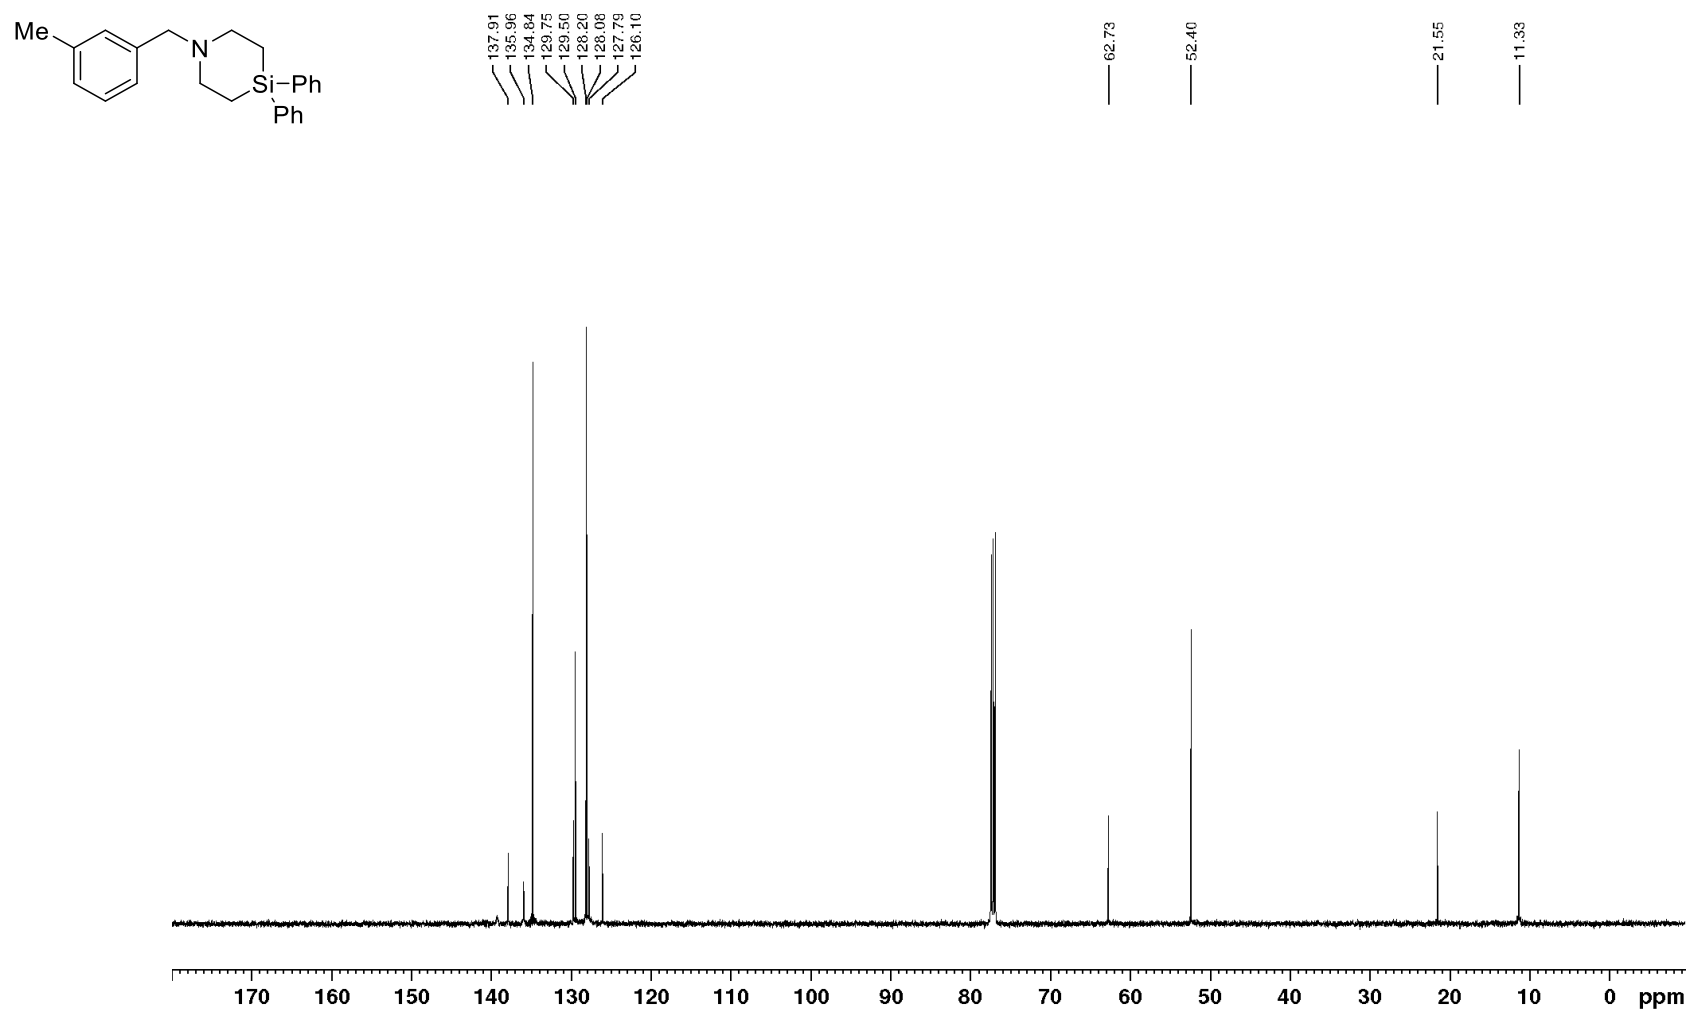

**Figure S16.**  $^1\text{H}/^{29}\text{Si}$  HMQC NMR (500/99 MHz,  $\text{CDCl}_3$ , 298 K, optimized for  $J = 7$  Hz) of **1-(3-methylbenzyl)-4,4-diphenyl-1,4-azasilinane (3da)**.

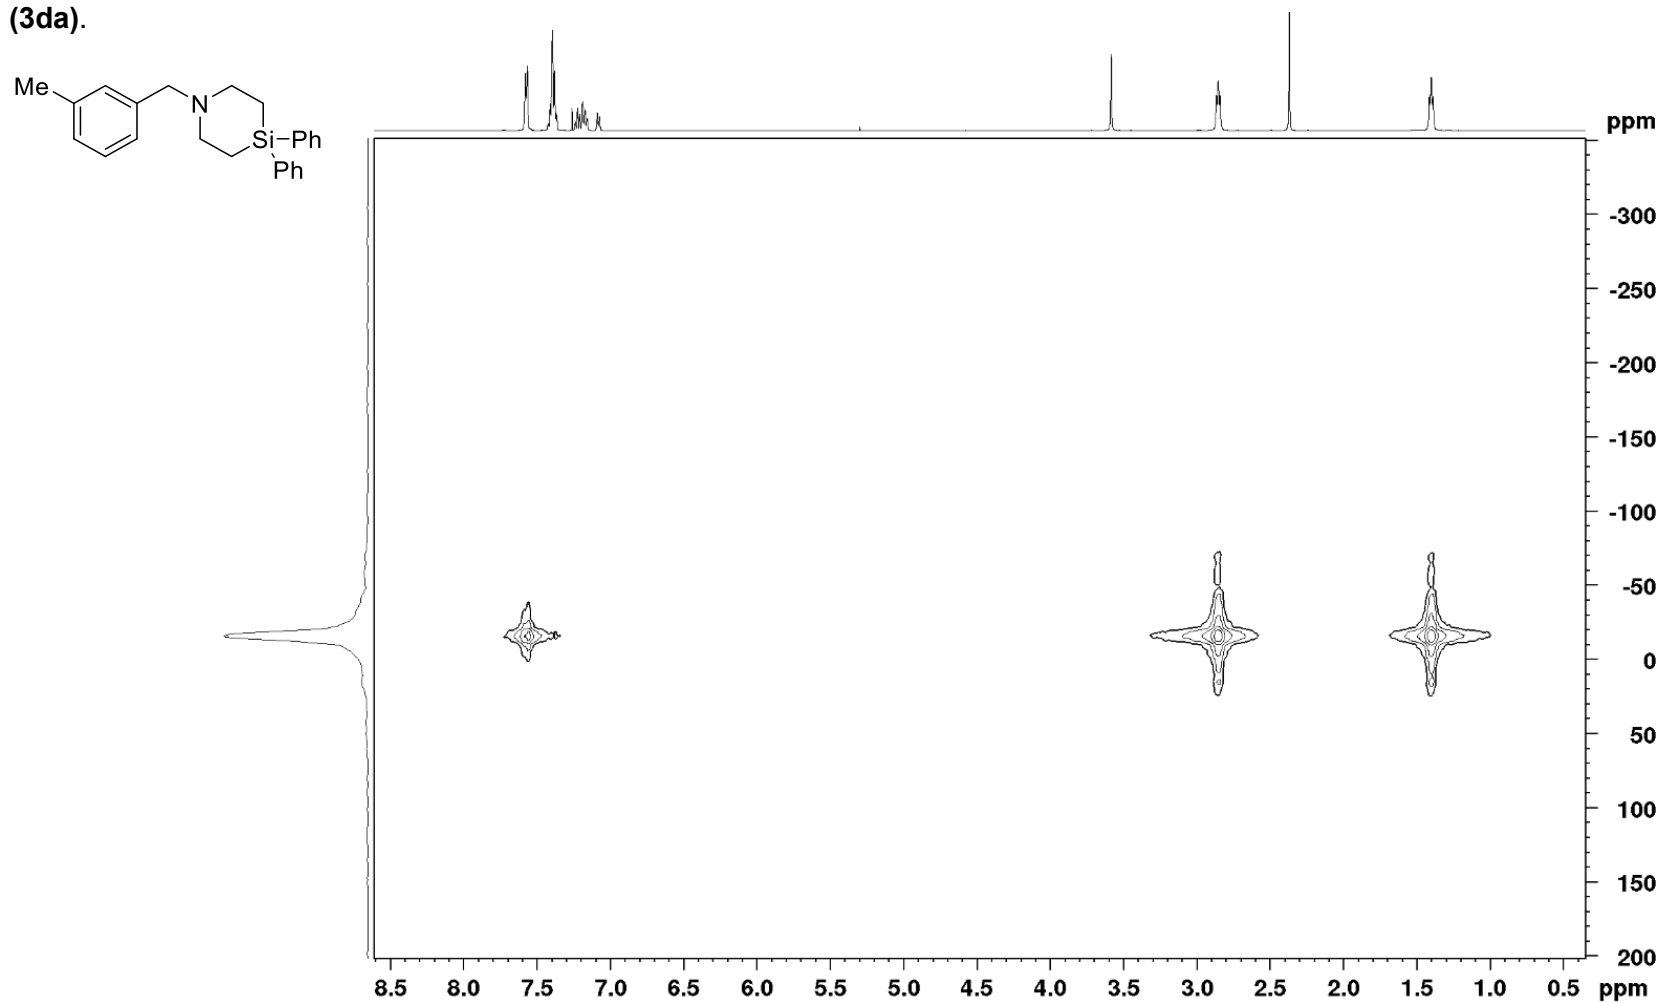

**Figure S17.**  $^1\text{H}$  NMR spectrum (500 MHz,  $\text{CDCl}_3$ , 298 K) of **1-(4-methylbenzyl)-4,4-diphenyl-1,4-azasilinane (3ea)**.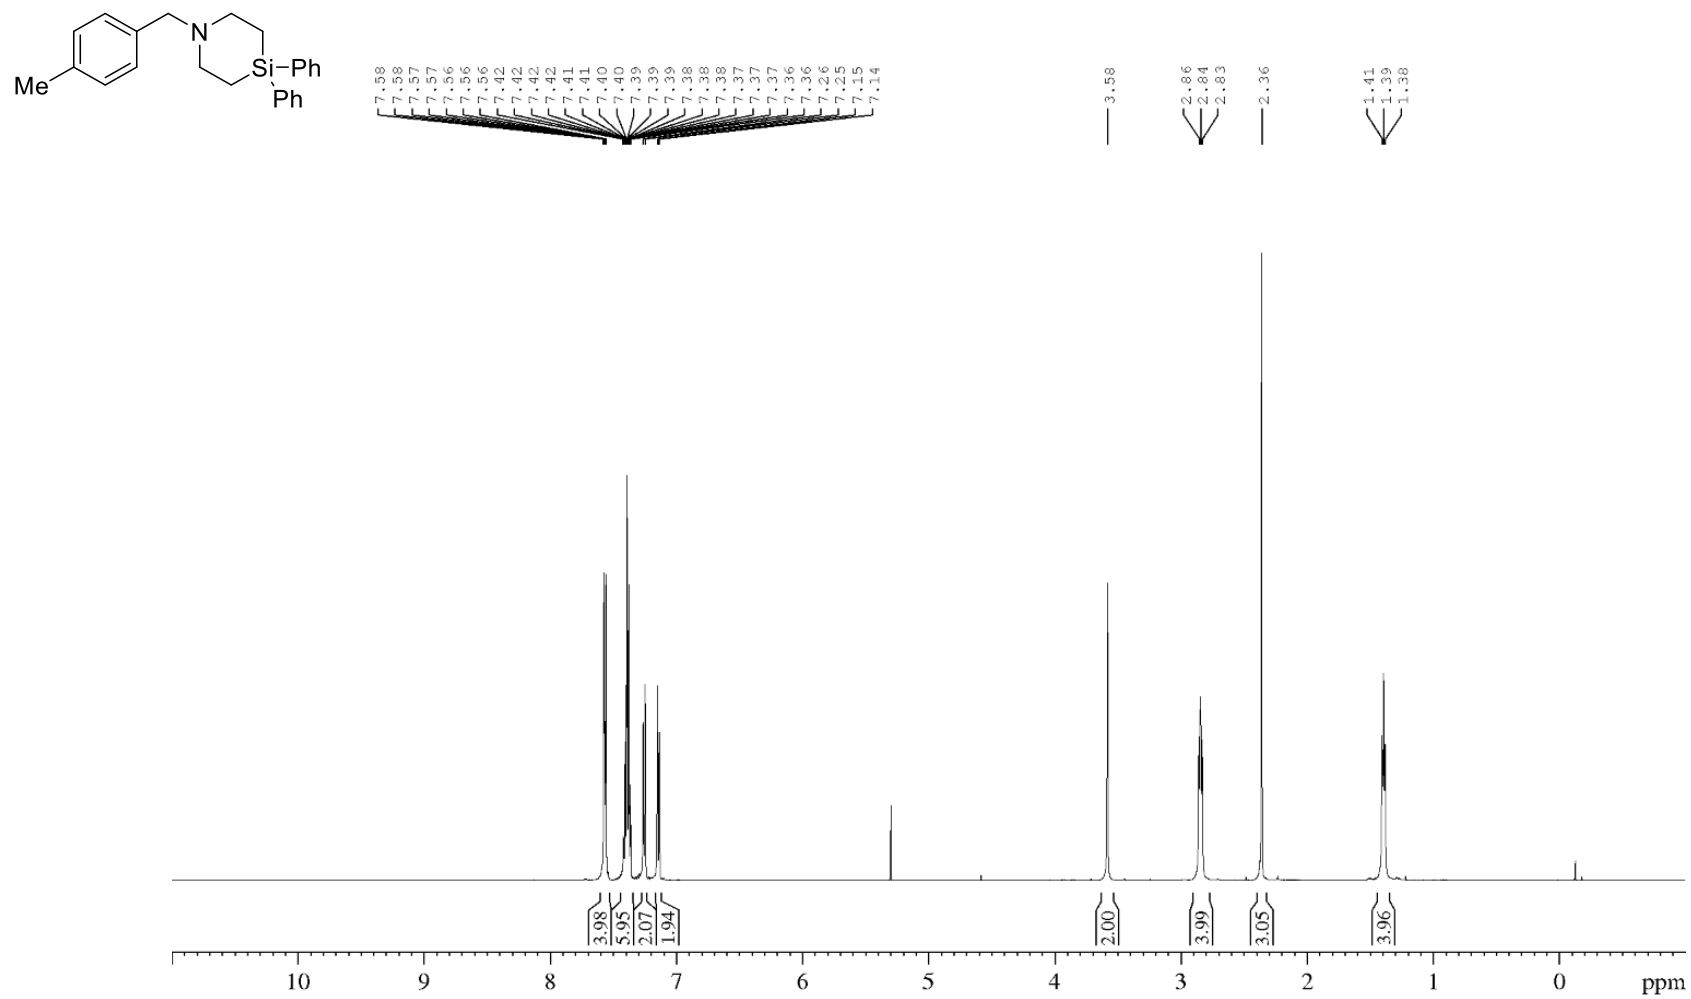

**Figure S18.**  $^{13}\text{C}$  NMR spectrum (125 MHz,  $\text{CDCl}_3$ , 298 K) of 1-(4-methylbenzyl)-4,4-diphenyl-1,4-azasilinane (**3ea**).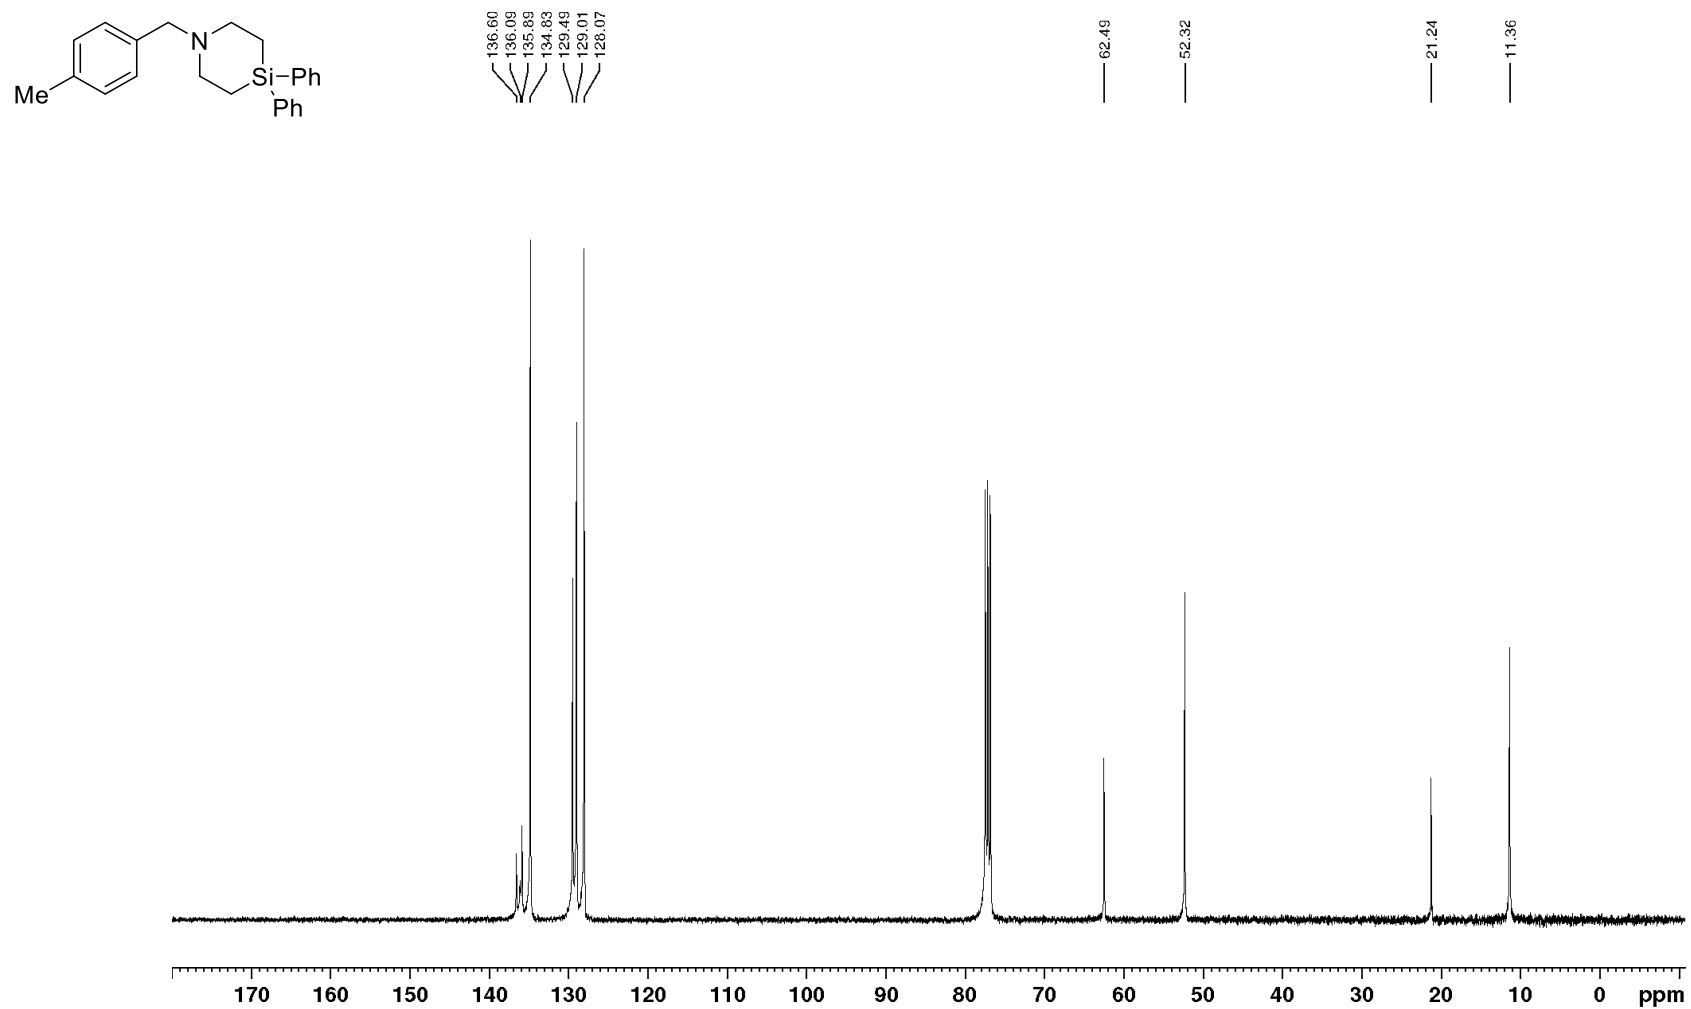



**Figure S19.**  $^1\text{H}/^{29}\text{Si}$  HMQC NMR (500/99 MHz,  $\text{CDCl}_3$ , 298 K, optimized for  $J = 7$  Hz) of **1-(4-methylbenzyl)-4,4-diphenyl-1,4-azasilinane (3ea)**.

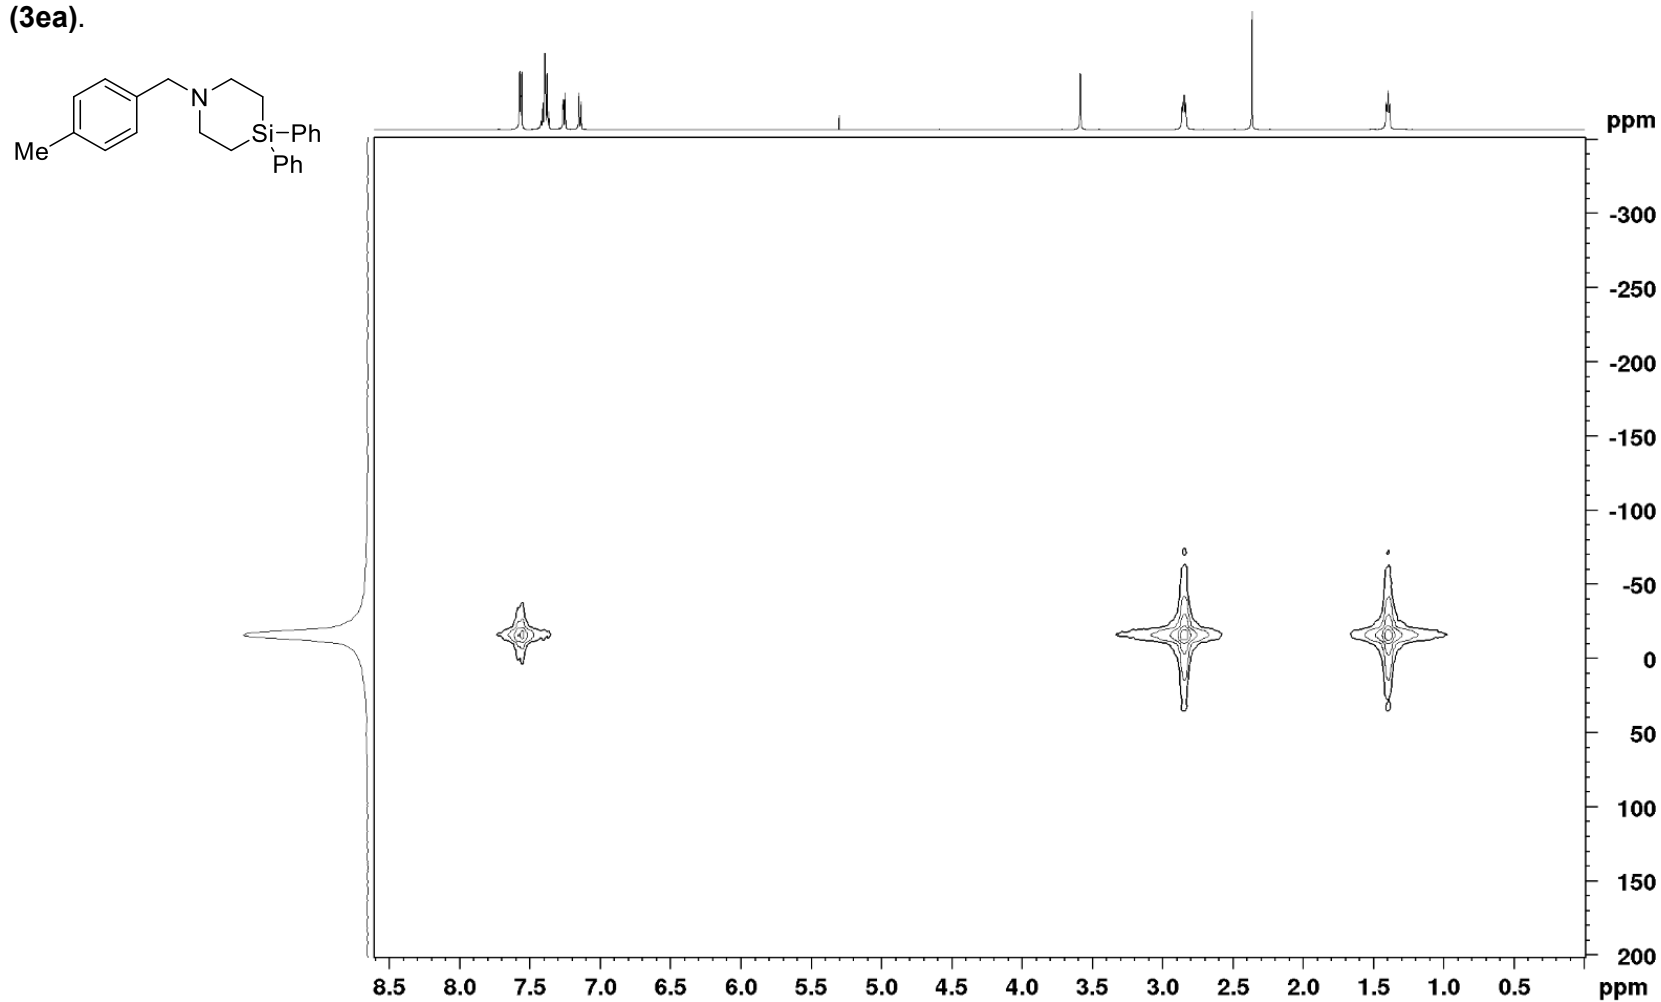

**Figure S20.**  $^1\text{H}$  NMR spectrum (500 MHz,  $\text{CDCl}_3$ , 298 K) of **1-(4-(*tert*-butyl)benzyl)-4,4-diphenyl-1,4-azasilinane (3fa)**.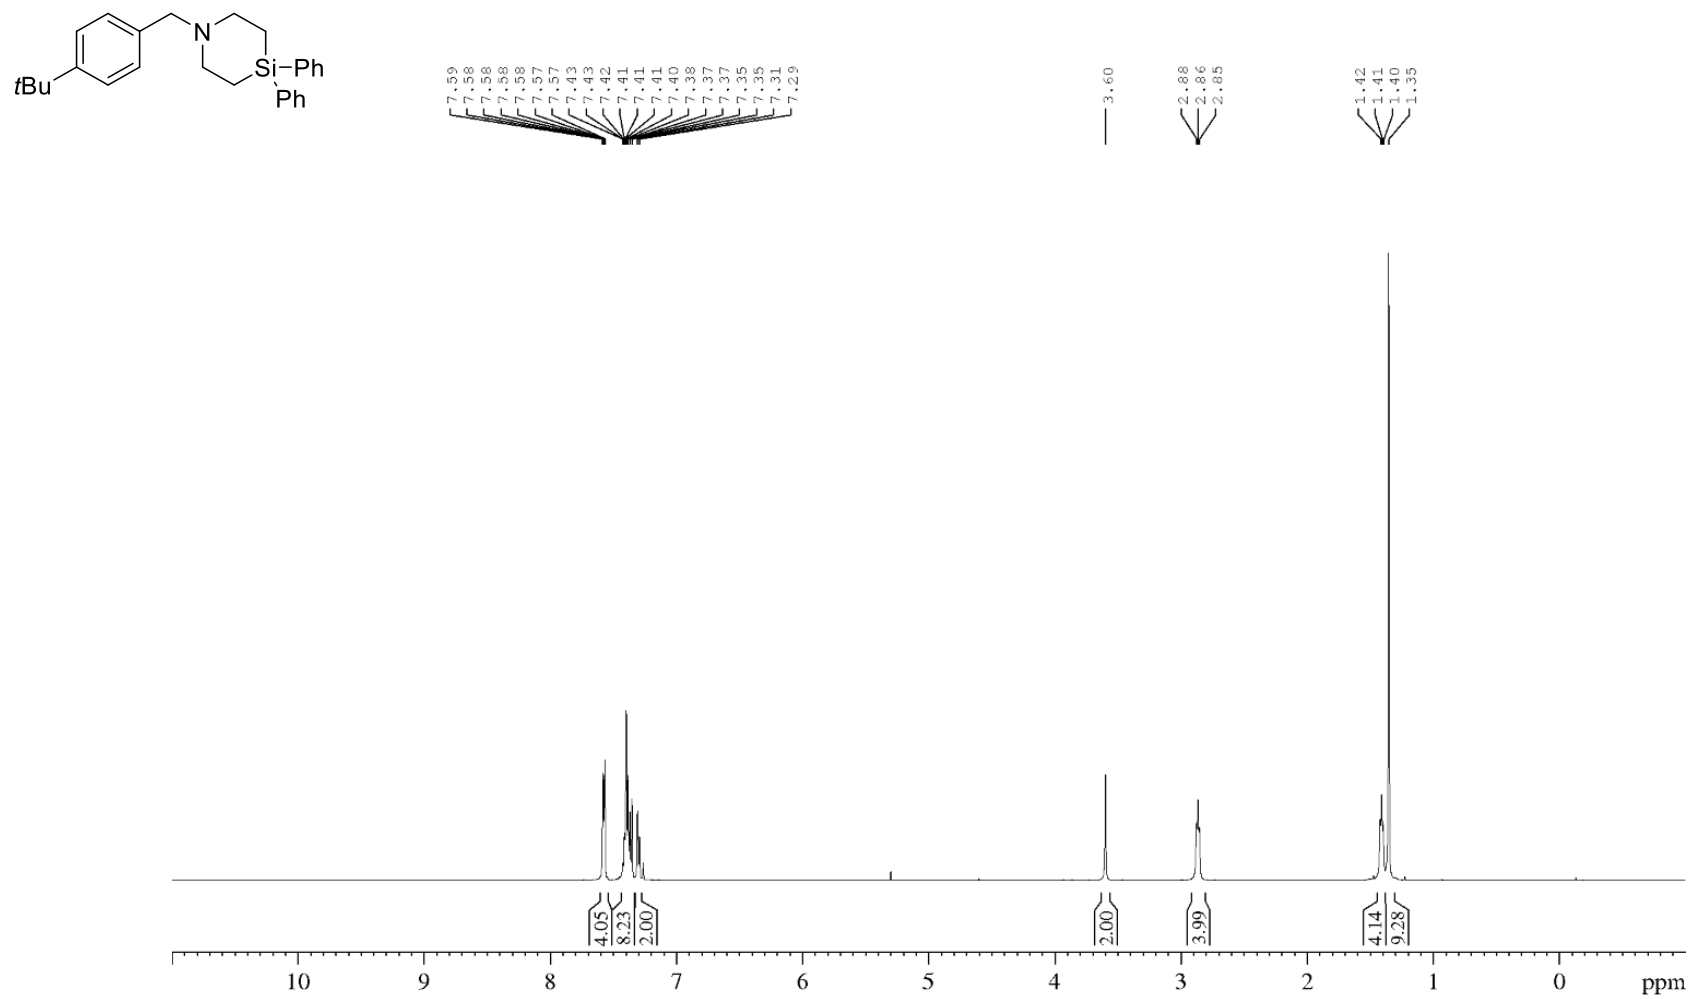

**Figure S21.**  $^{13}\text{C}$  NMR spectrum (125 MHz,  $\text{CDCl}_3$ , 298 K) of **1-(4-(*tert*-butyl)benzyl)-4,4-diphenyl-1,4-azasilinane (3fa)**.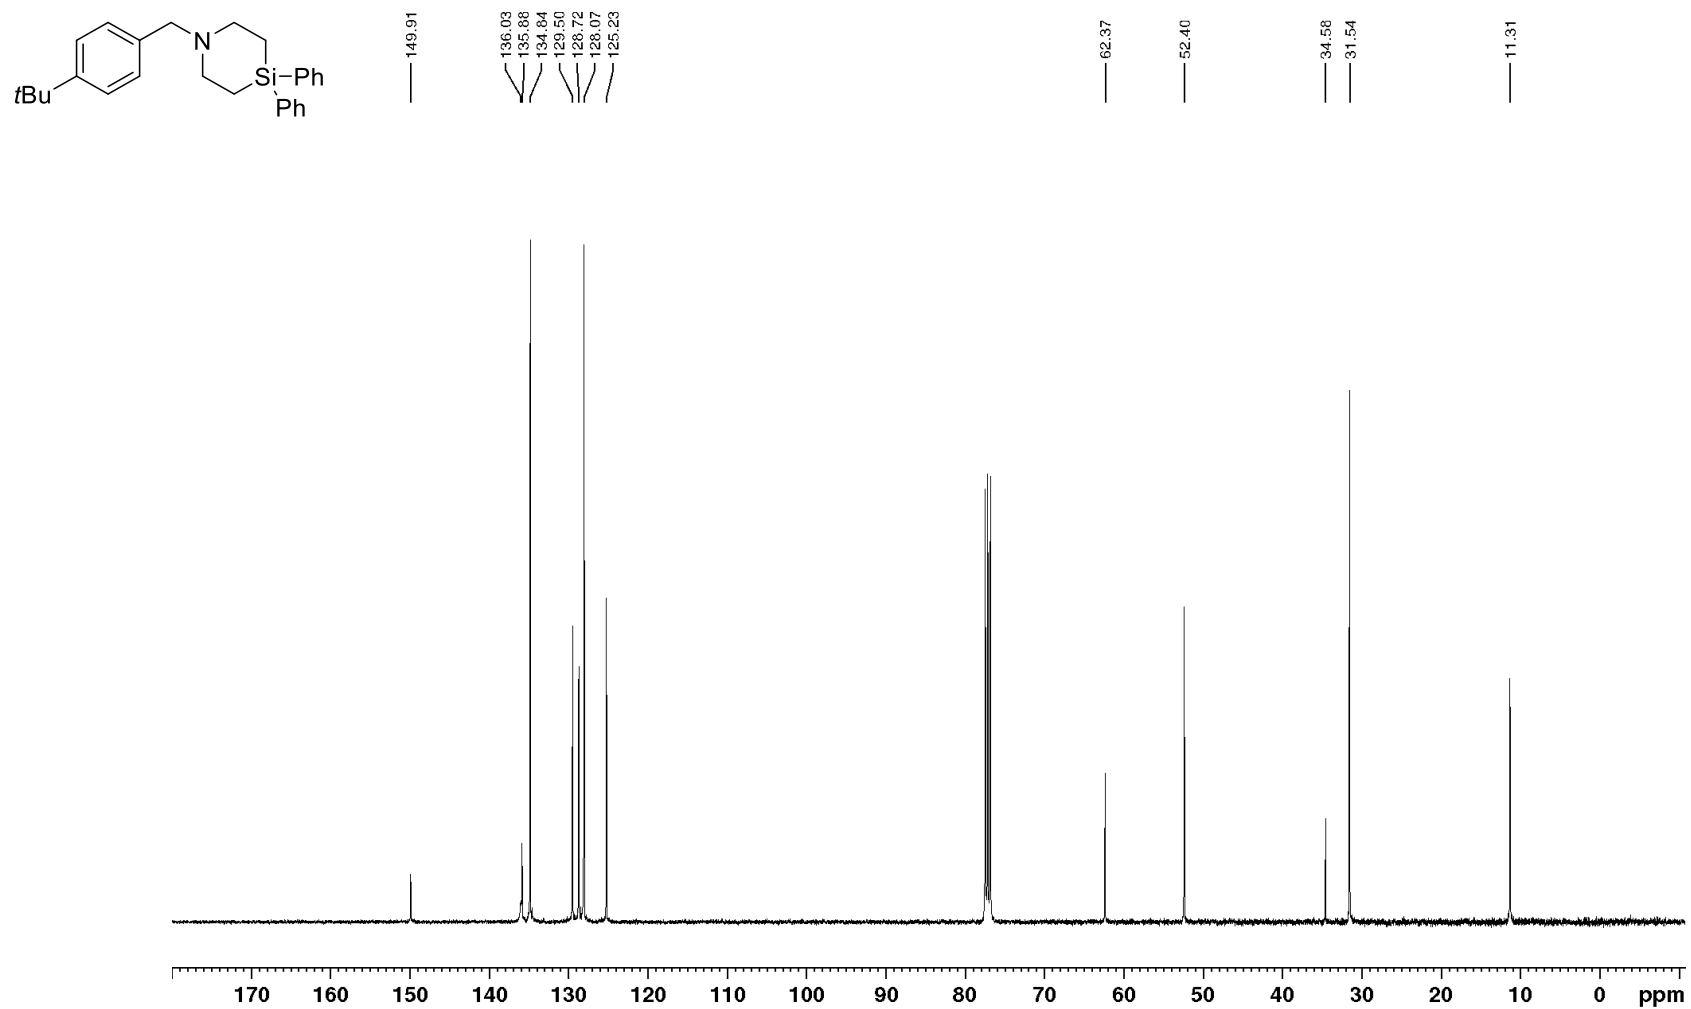

**Figure S22.**  $^1\text{H}/^{29}\text{Si}$  HMQC NMR (500/99 MHz,  $\text{CDCl}_3$ , 298 K, optimized for  $J = 7$  Hz) of **1-(4-(*tert*-butyl)benzyl)-4,4-diphenyl-1,4-azasilinane (3fa)**.

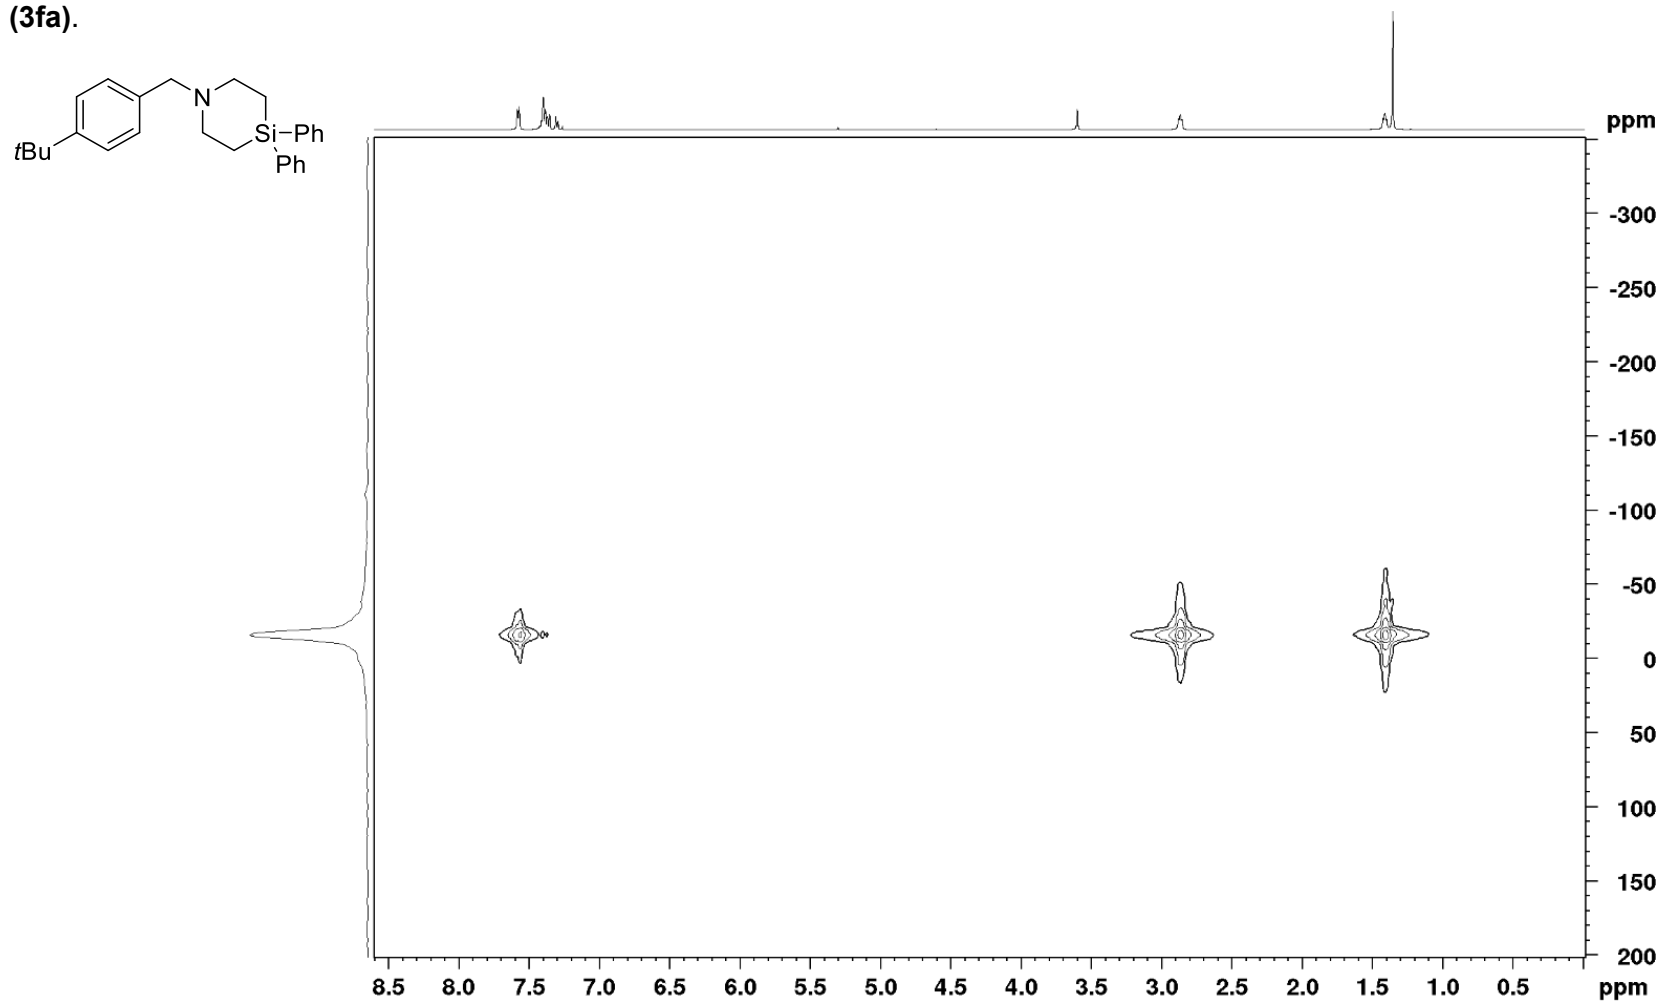

**Figure S23.**  $^1\text{H}$  NMR spectrum (500 MHz,  $\text{CDCl}_3$ , 298 K) of **1-(4-fluorobenzyl)-4,4-diphenyl-1,4-azasilinane (3ga)**.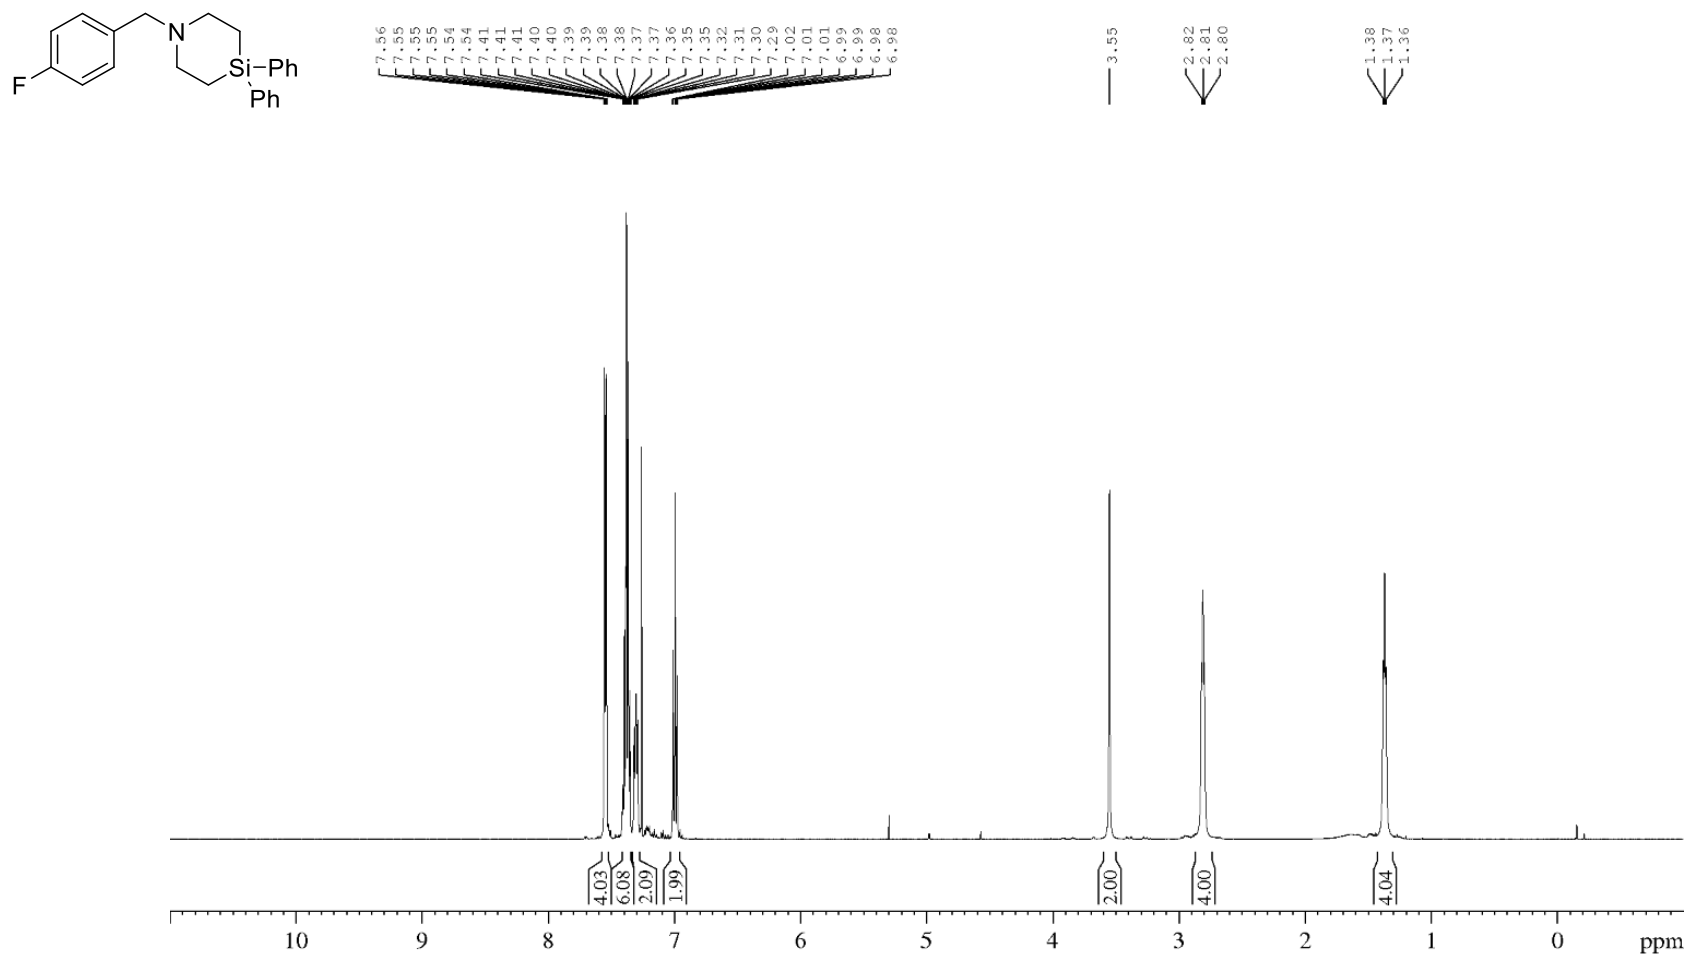

**Figure S24.**  $^{13}\text{C}$  NMR spectrum (125 MHz,  $\text{CDCl}_3$ , 298 K) of 1-(4-fluorobenzyl)-4,4-diphenyl-1,4-azasilinane (**3ga**).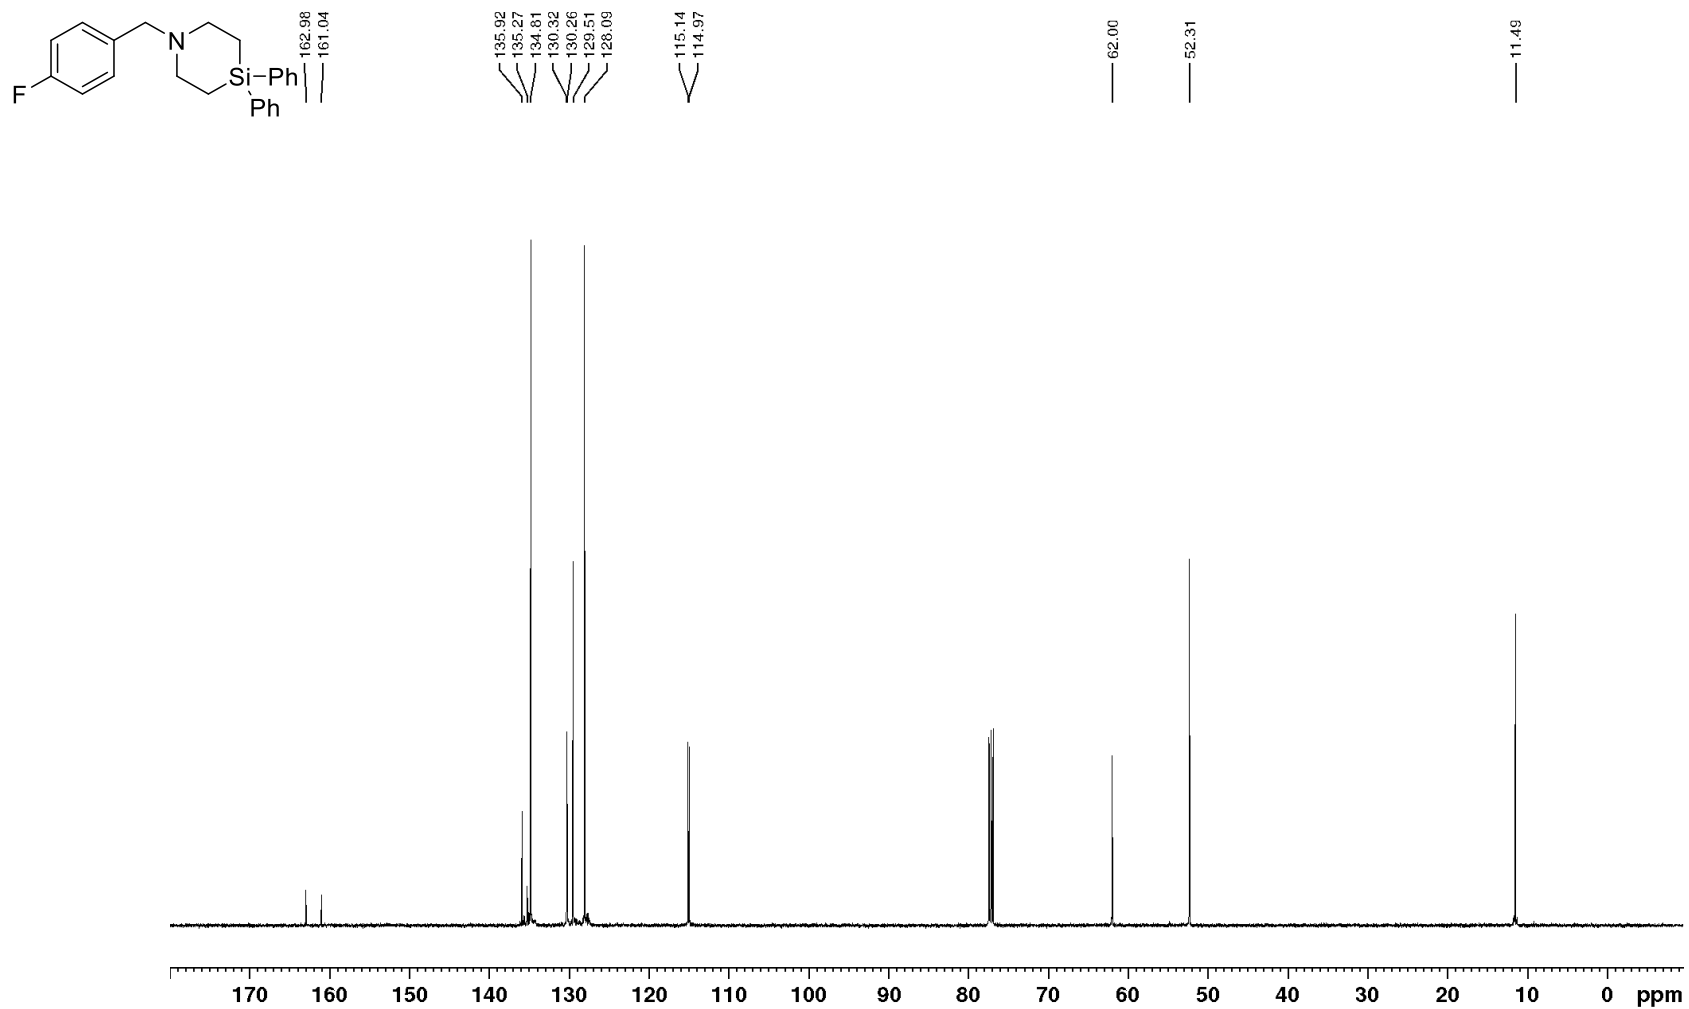

**Figure S25.**  $^{19}\text{F}$  NMR spectrum (471 MHz,  $\text{CDCl}_3$ , 298 K) of 1-(4-fluorobenzyl)-4,4-diphenyl-1,4-azasilinane (**3ga**).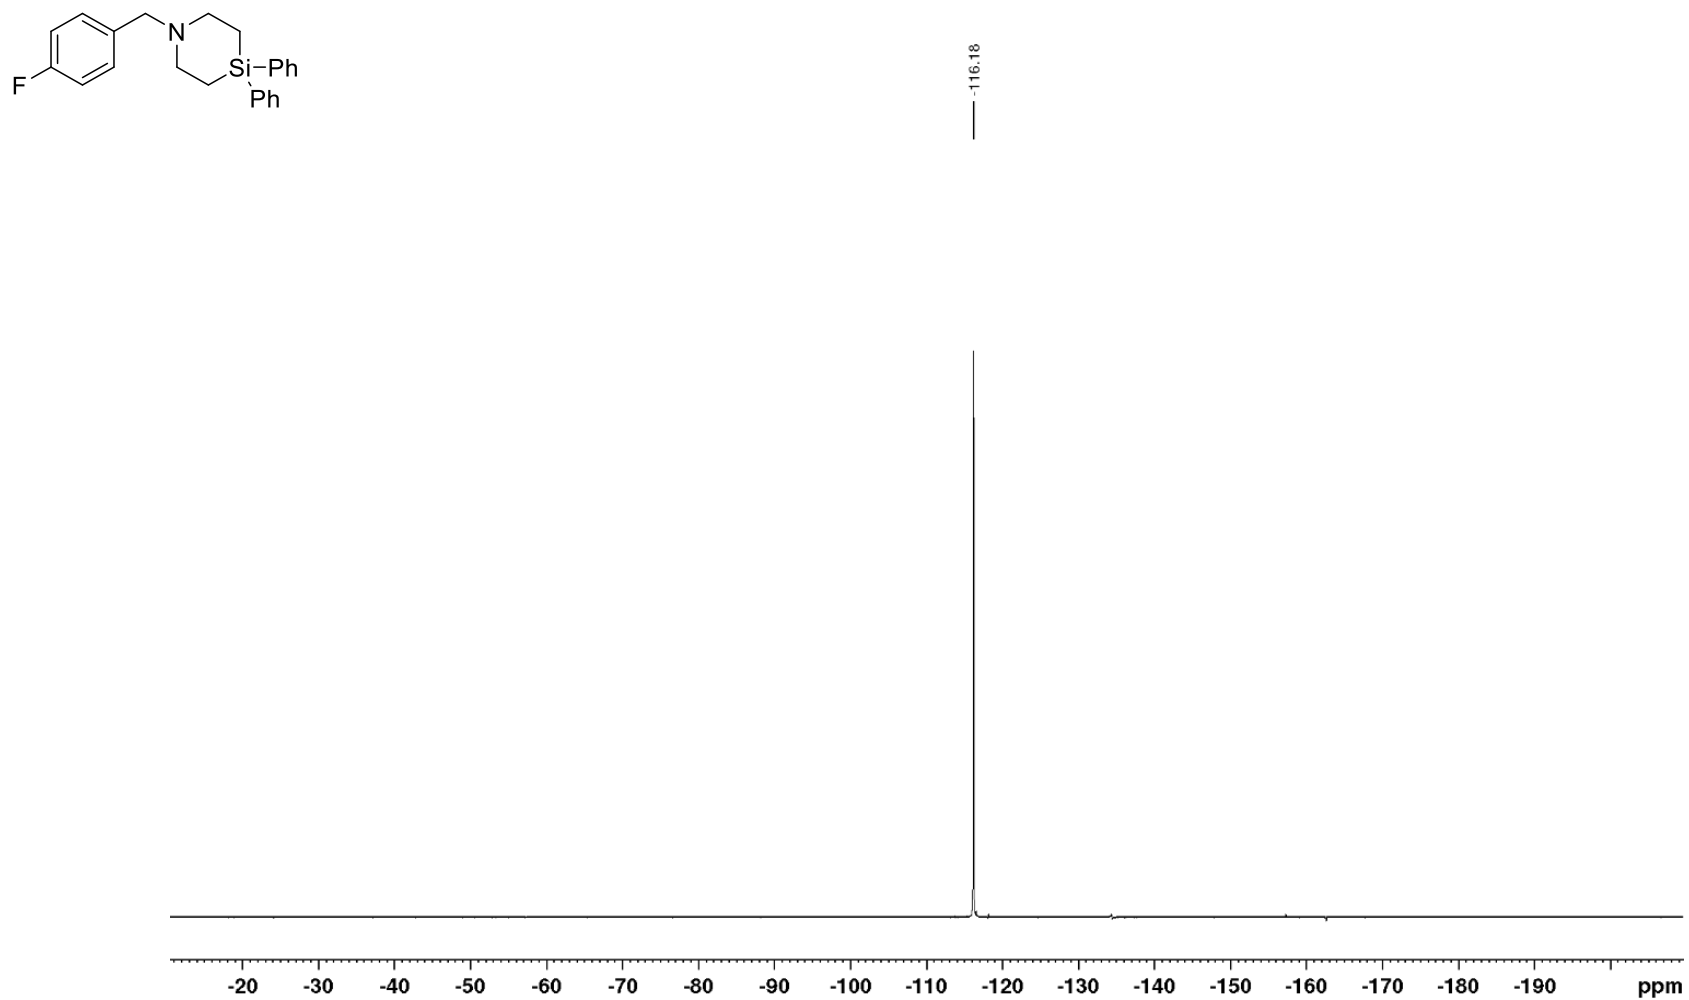

**Figure S26.**  $^1\text{H}/^{29}\text{Si}$  HMQC NMR (500/99 MHz,  $\text{CDCl}_3$ , 298 K, optimized for  $J = 7$  Hz) of **1-(4-fluorobenzyl)-4,4-diphenyl-1,4-azasilinane (3ga)**.

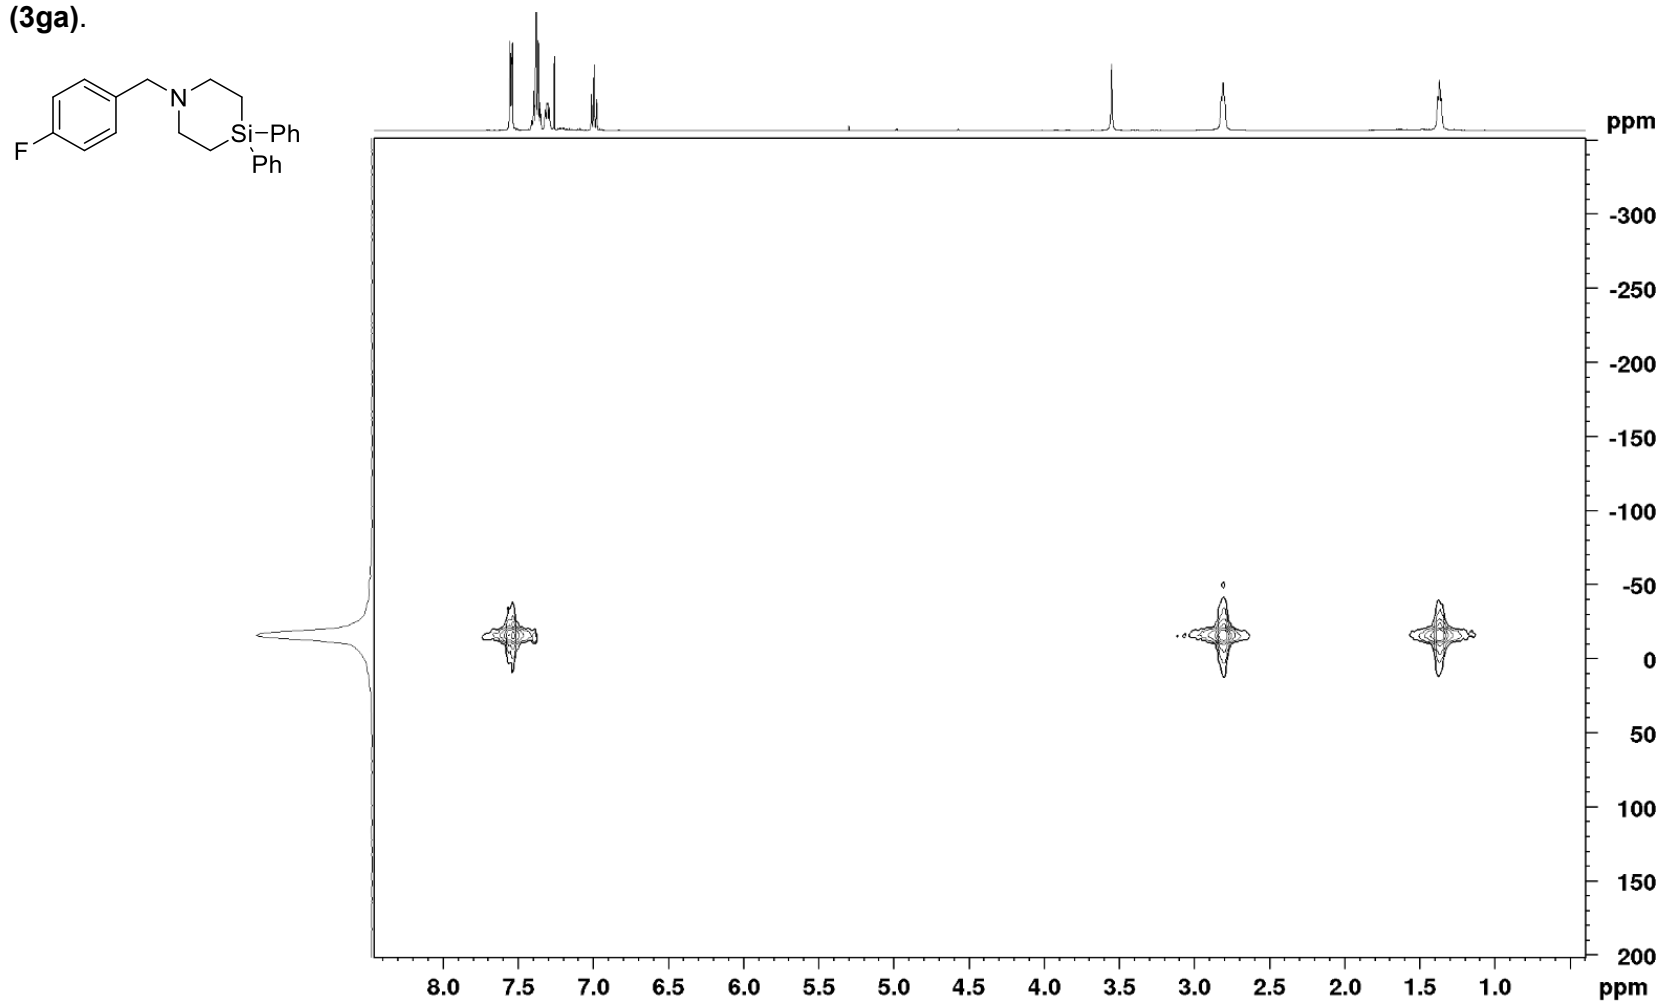



**Figure S27.**  $^1\text{H}$  NMR spectrum (500 MHz,  $\text{CDCl}_3$ , 298 K) of **1-(4-chlorobenzyl)-4,4-diphenyl-1,4-azasilinane (3ha)**.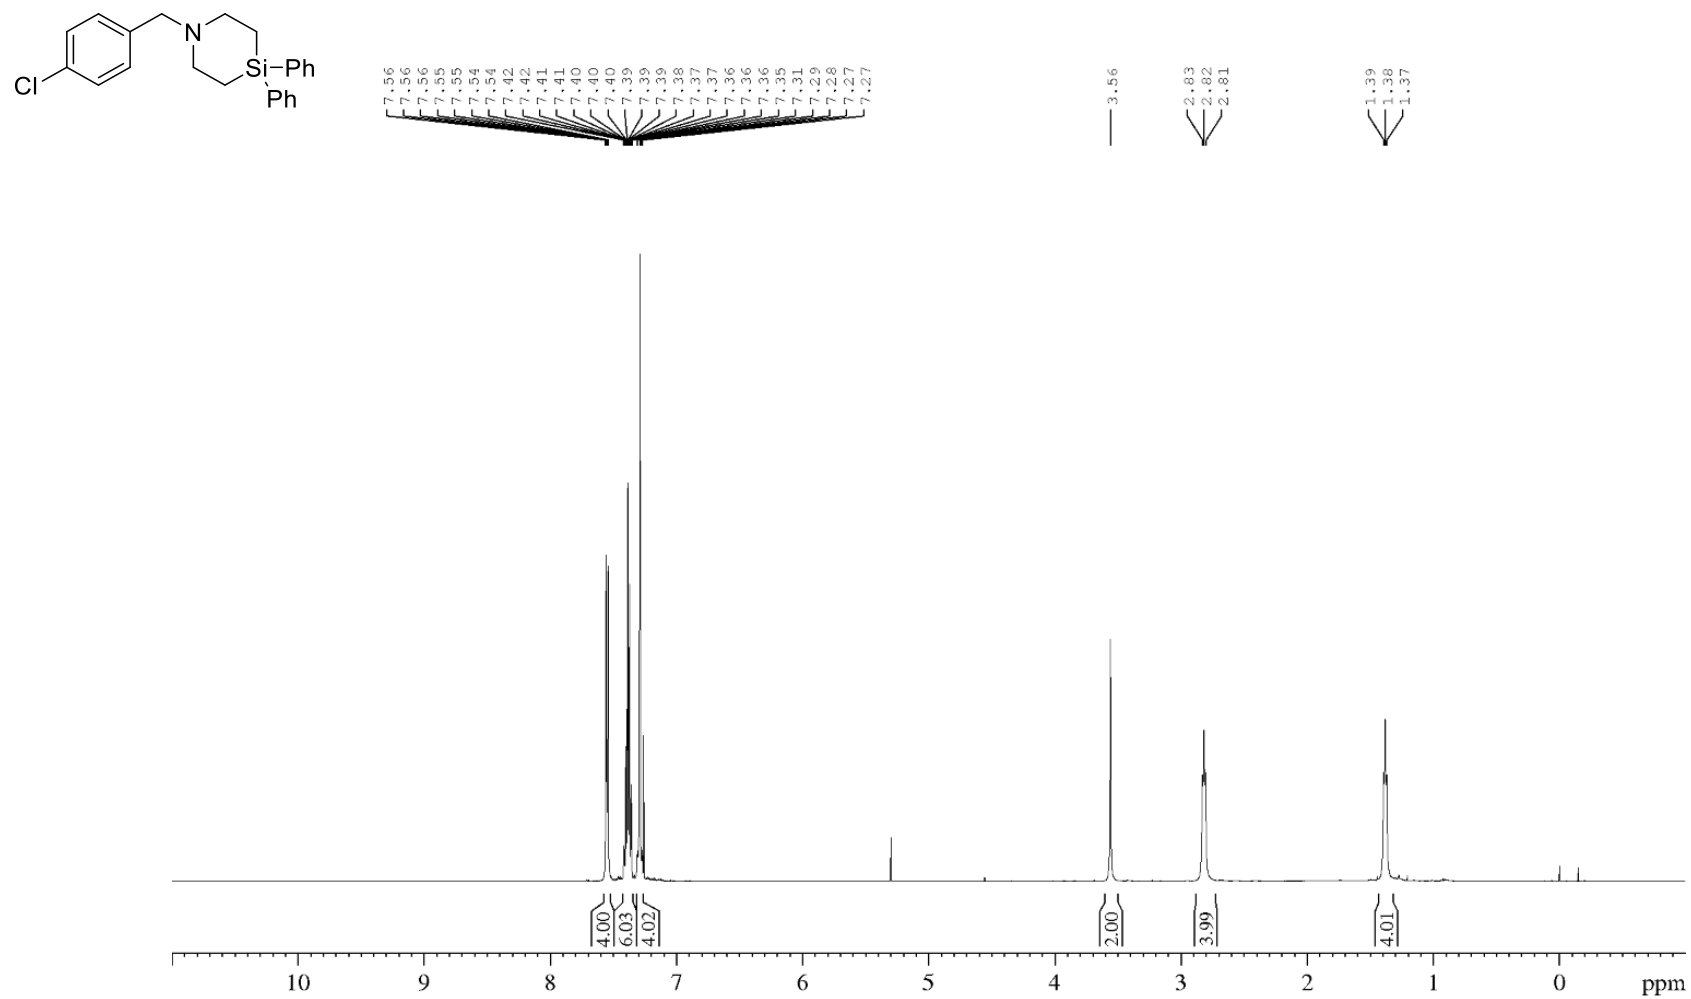

**Figure S28.**  $^{13}\text{C}$  NMR spectrum (125 MHz,  $\text{CDCl}_3$ , 298 K) of **1-(4-chlorobenzyl)-4,4-diphenyl-1,4-azasilinane (3ha)**.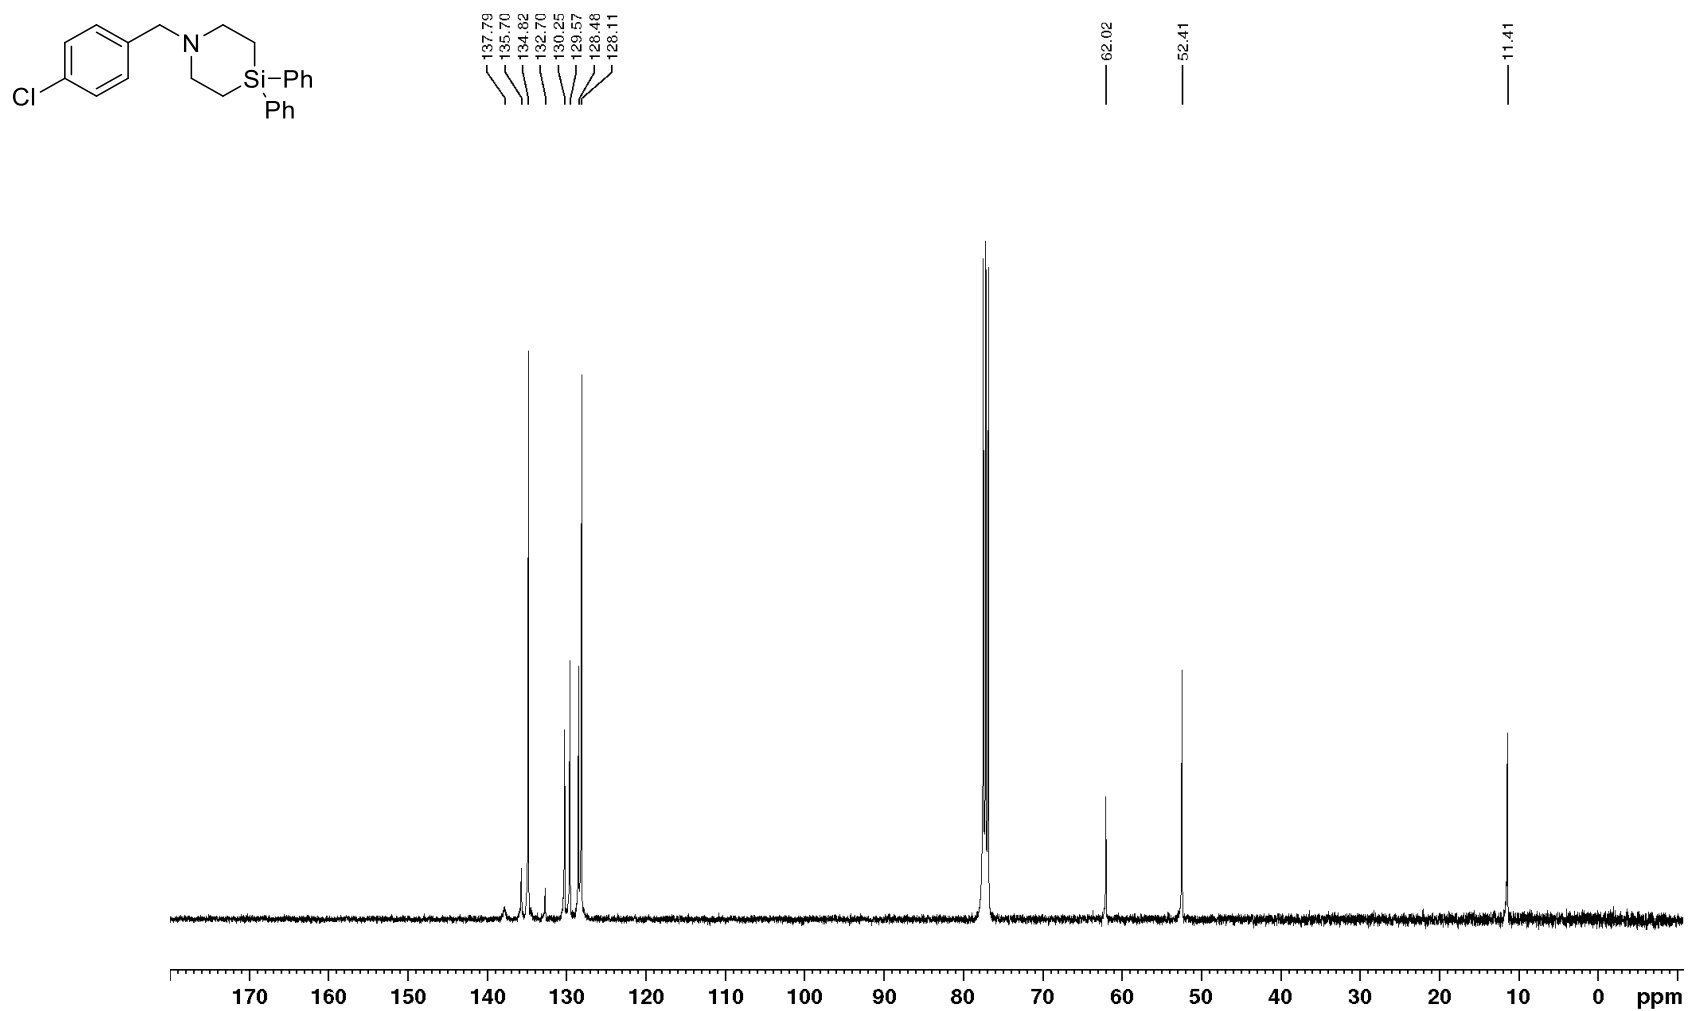

**Figure S29.**  $^1\text{H}/^{29}\text{Si}$  HMQC NMR (500/99 MHz,  $\text{CDCl}_3$ , 298 K, optimized for  $J = 7$  Hz) of **1-(4-chlorobenzyl)-4,4-diphenyl-1,4-azasilinane (3ha)**.

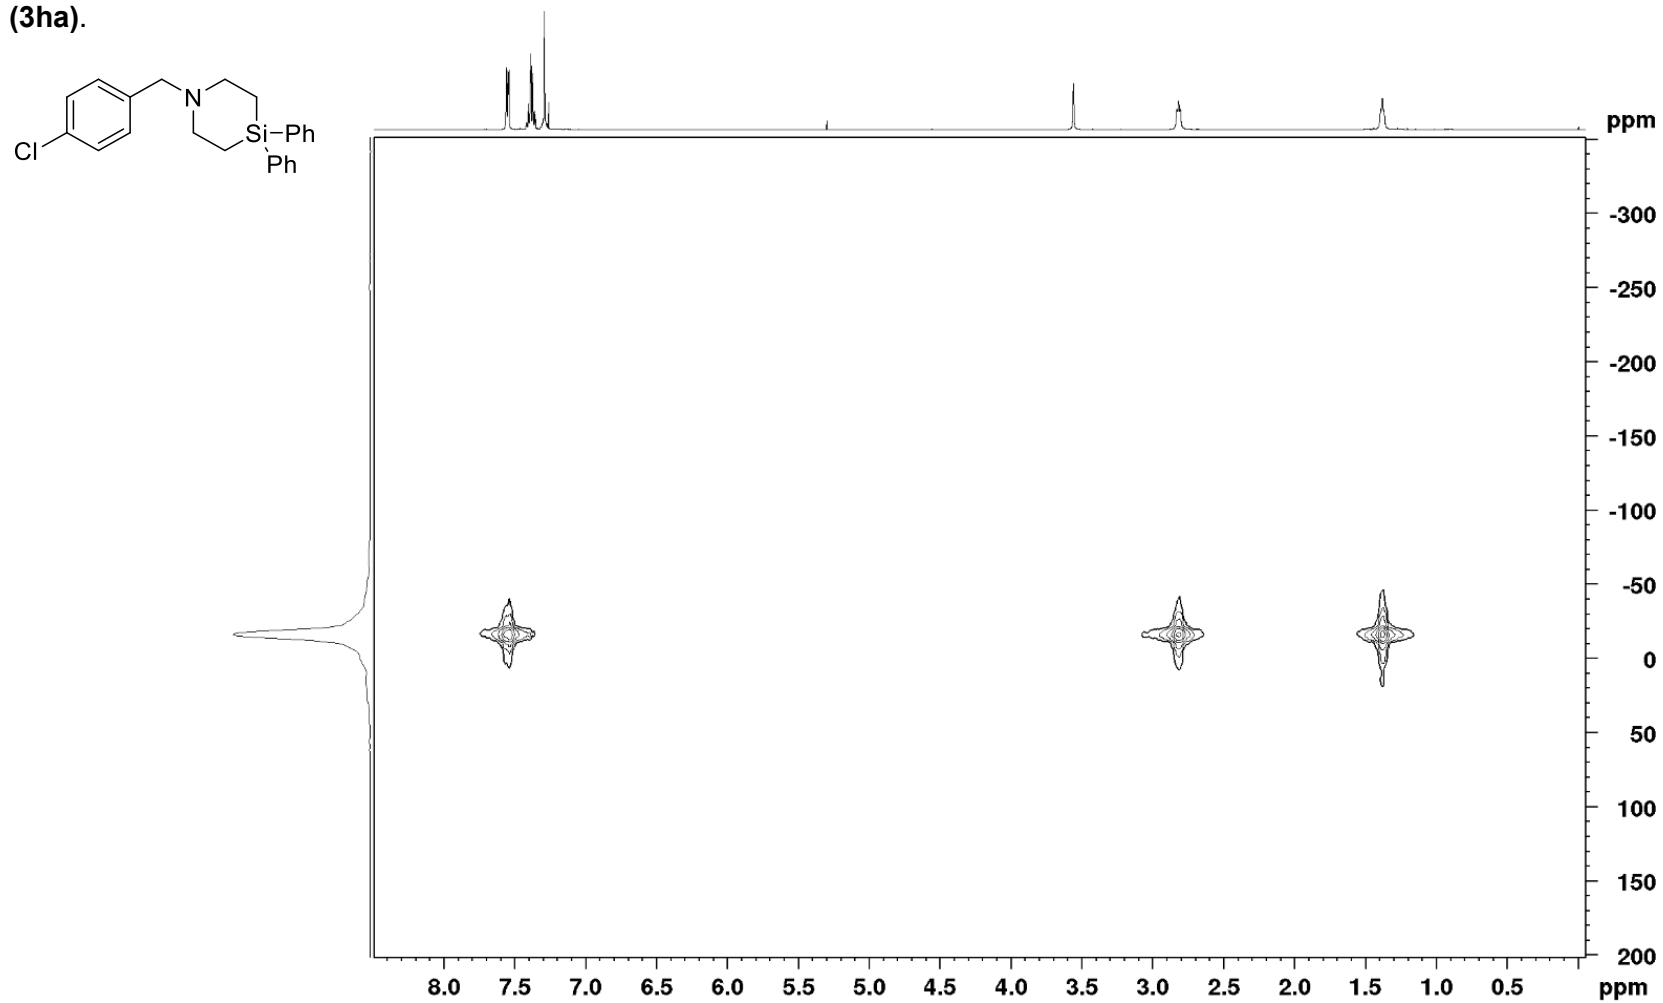

**Figure S30.**  $^1\text{H}$  NMR spectrum (500 MHz,  $\text{CDCl}_3$ , 298 K) of **1-(4-bromobenzyl)-4,4-diphenyl-1,4-azasilinane (3ia)**.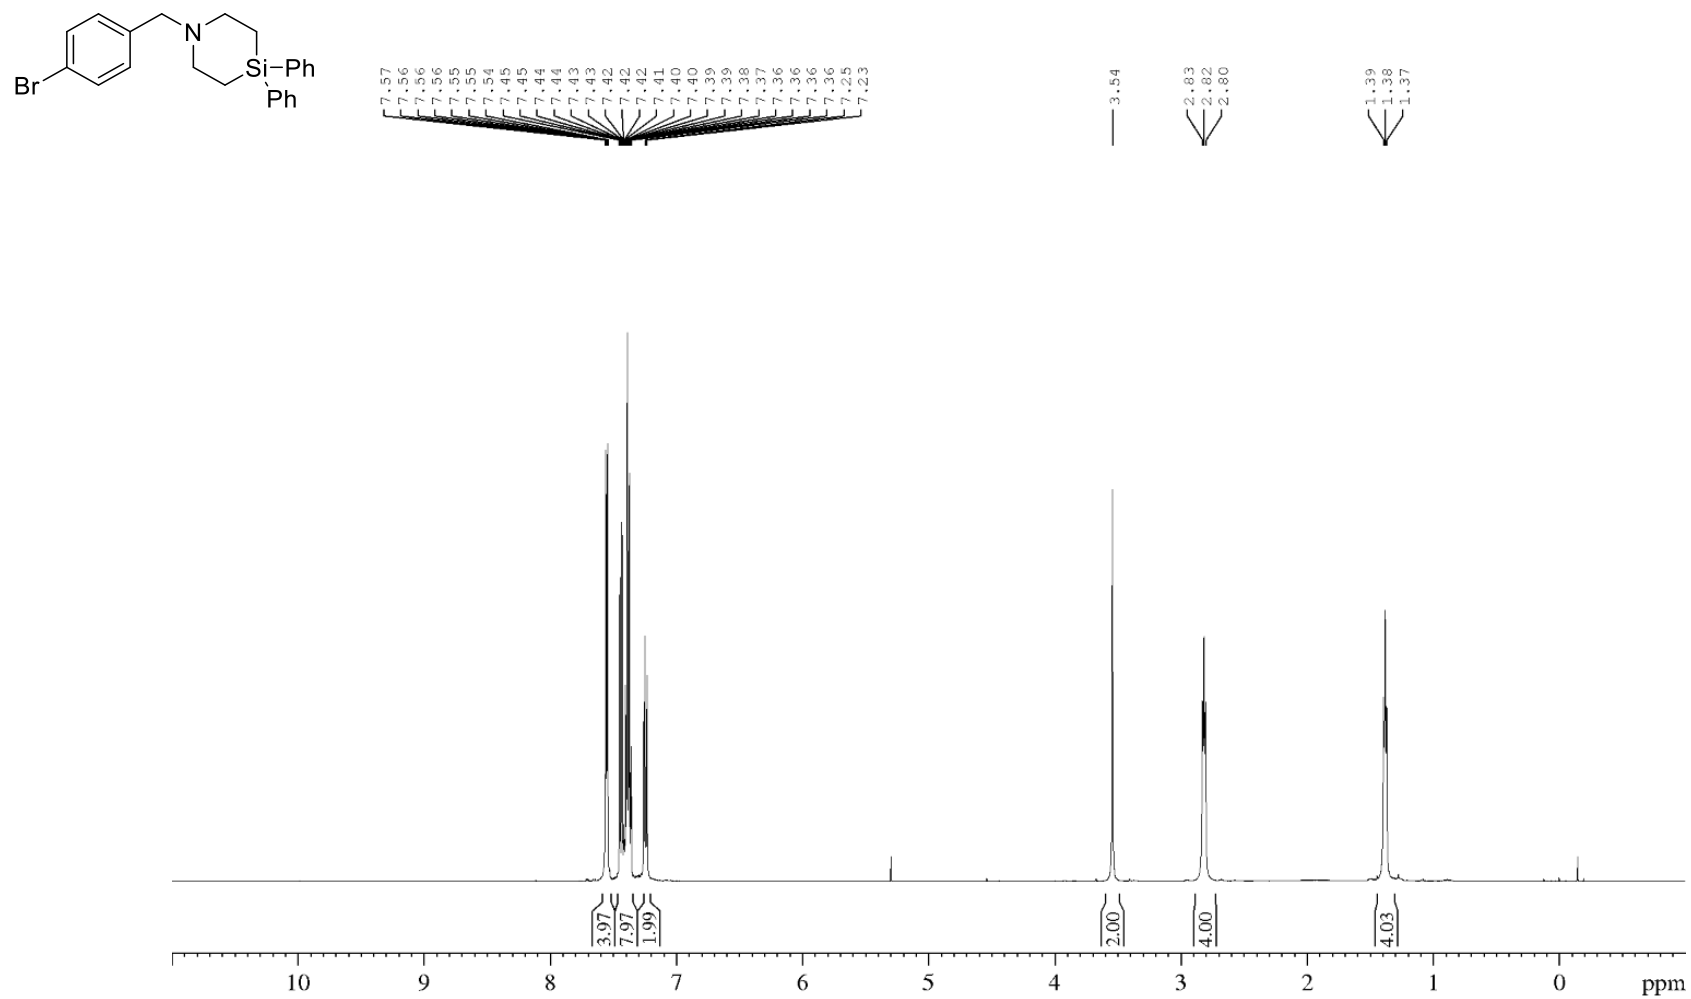

**Figure S31.**  $^{13}\text{C}$  NMR spectrum (125 MHz,  $\text{CDCl}_3$ , 298 K) of **1-(4-bromobenzyl)-4,4-diphenyl-1,4-azasilinane (3ia)**.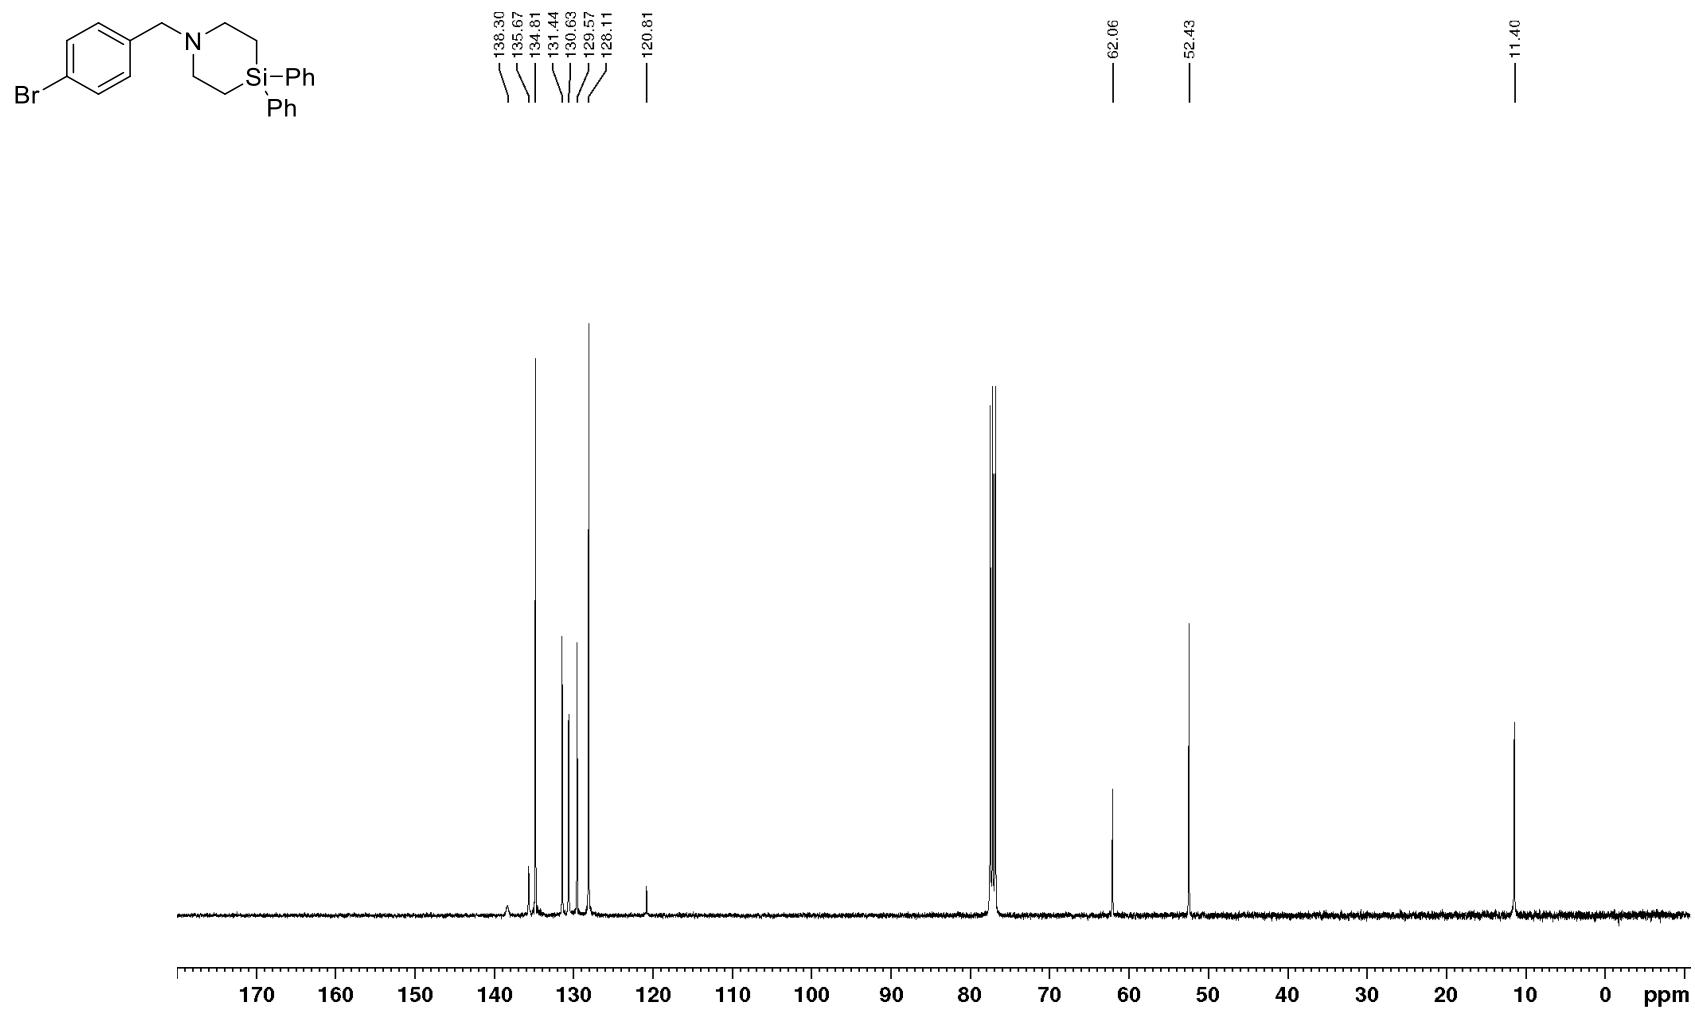

**Figure S32.**  $^1\text{H}/^{29}\text{Si}$  HMQC NMR (500/99 MHz,  $\text{CDCl}_3$ , 298 K, optimized for  $J = 7$  Hz) of **1-(4-bromobenzyl)-4,4-diphenyl-1,4-azasilinane (3ia)**.

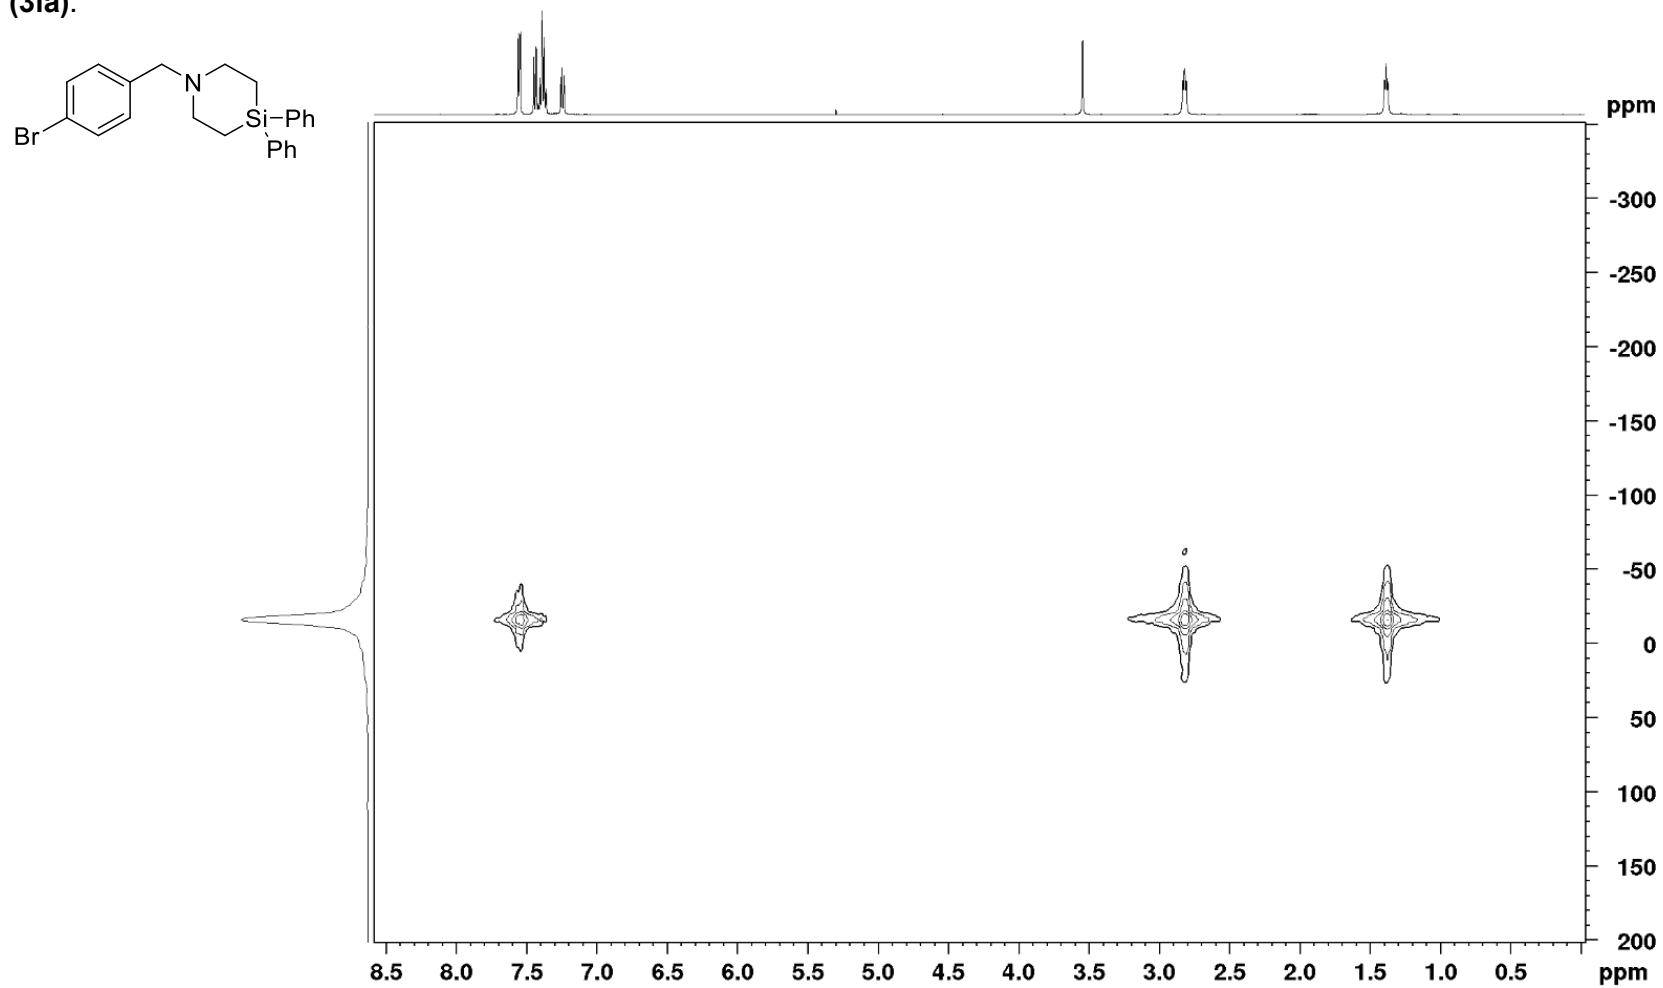

**Figure S33.**  $^1\text{H}$  NMR spectrum (500 MHz,  $\text{CDCl}_3$ , 298 K) of **1-(4-iodobenzyl)-4,4-diphenyl-1,4-azasilinane (3ja)**.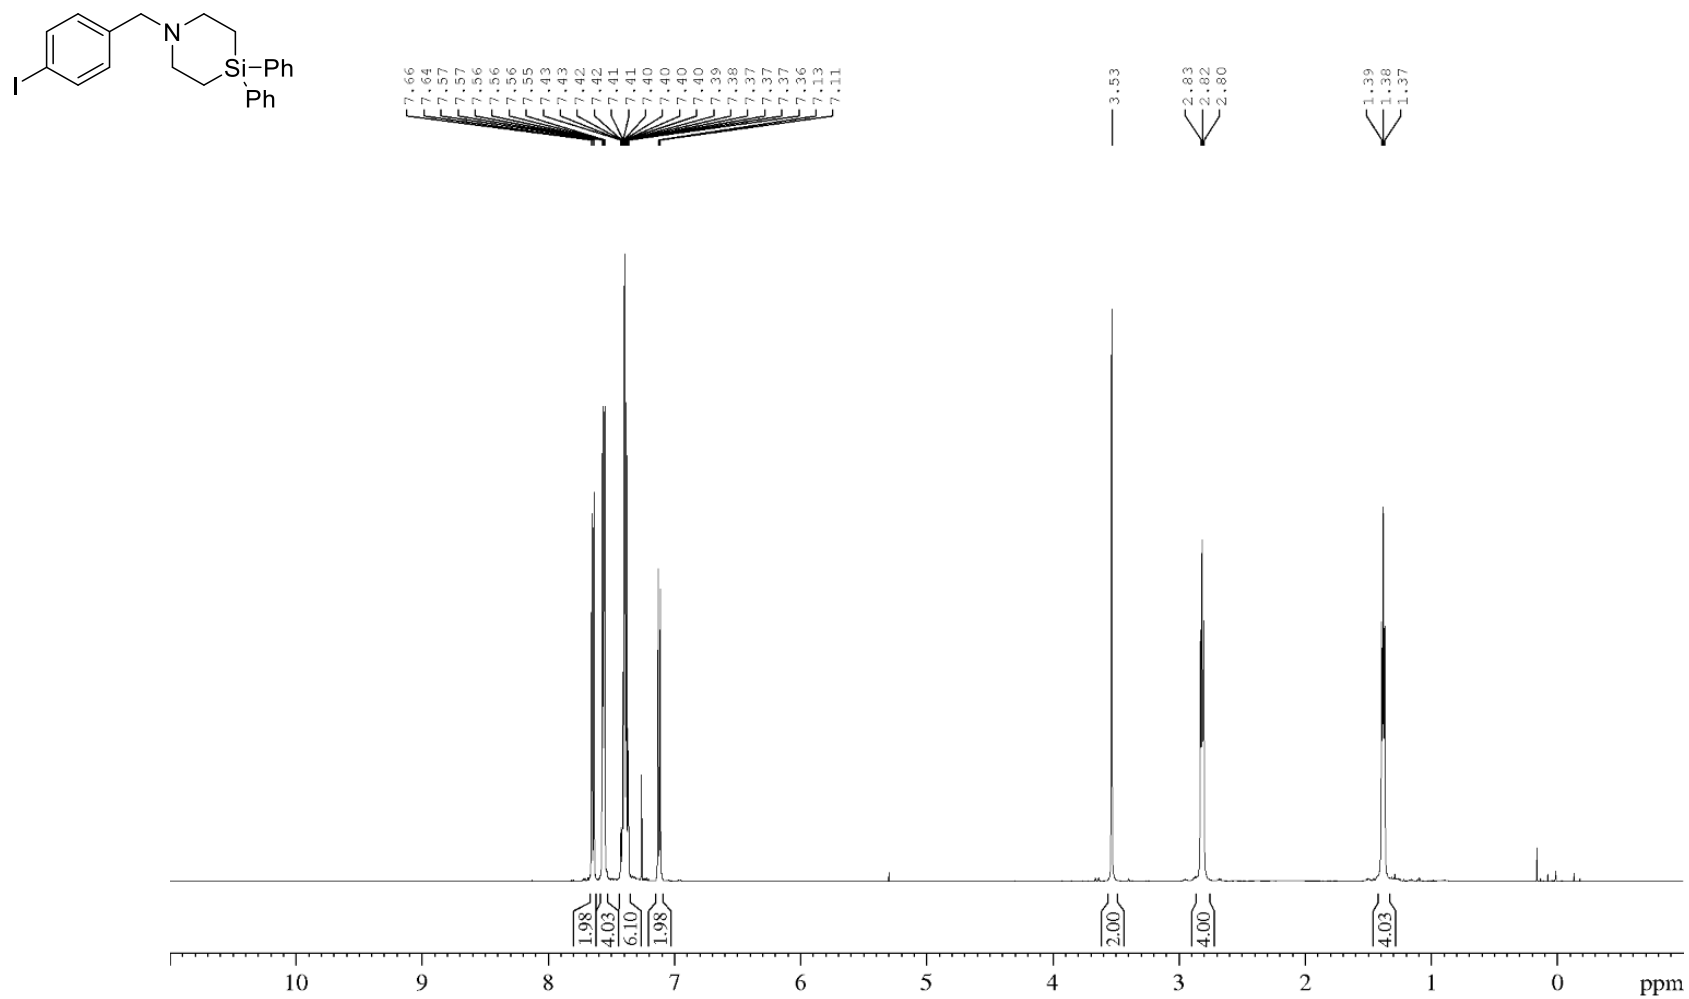

**Figure S34.**  $^{13}\text{C}$  NMR spectrum (125 MHz,  $\text{CDCl}_3$ , 298 K) of **1-(4-iodobenzyl)-4,4-diphenyl-1,4-azasilinane (3ja)**.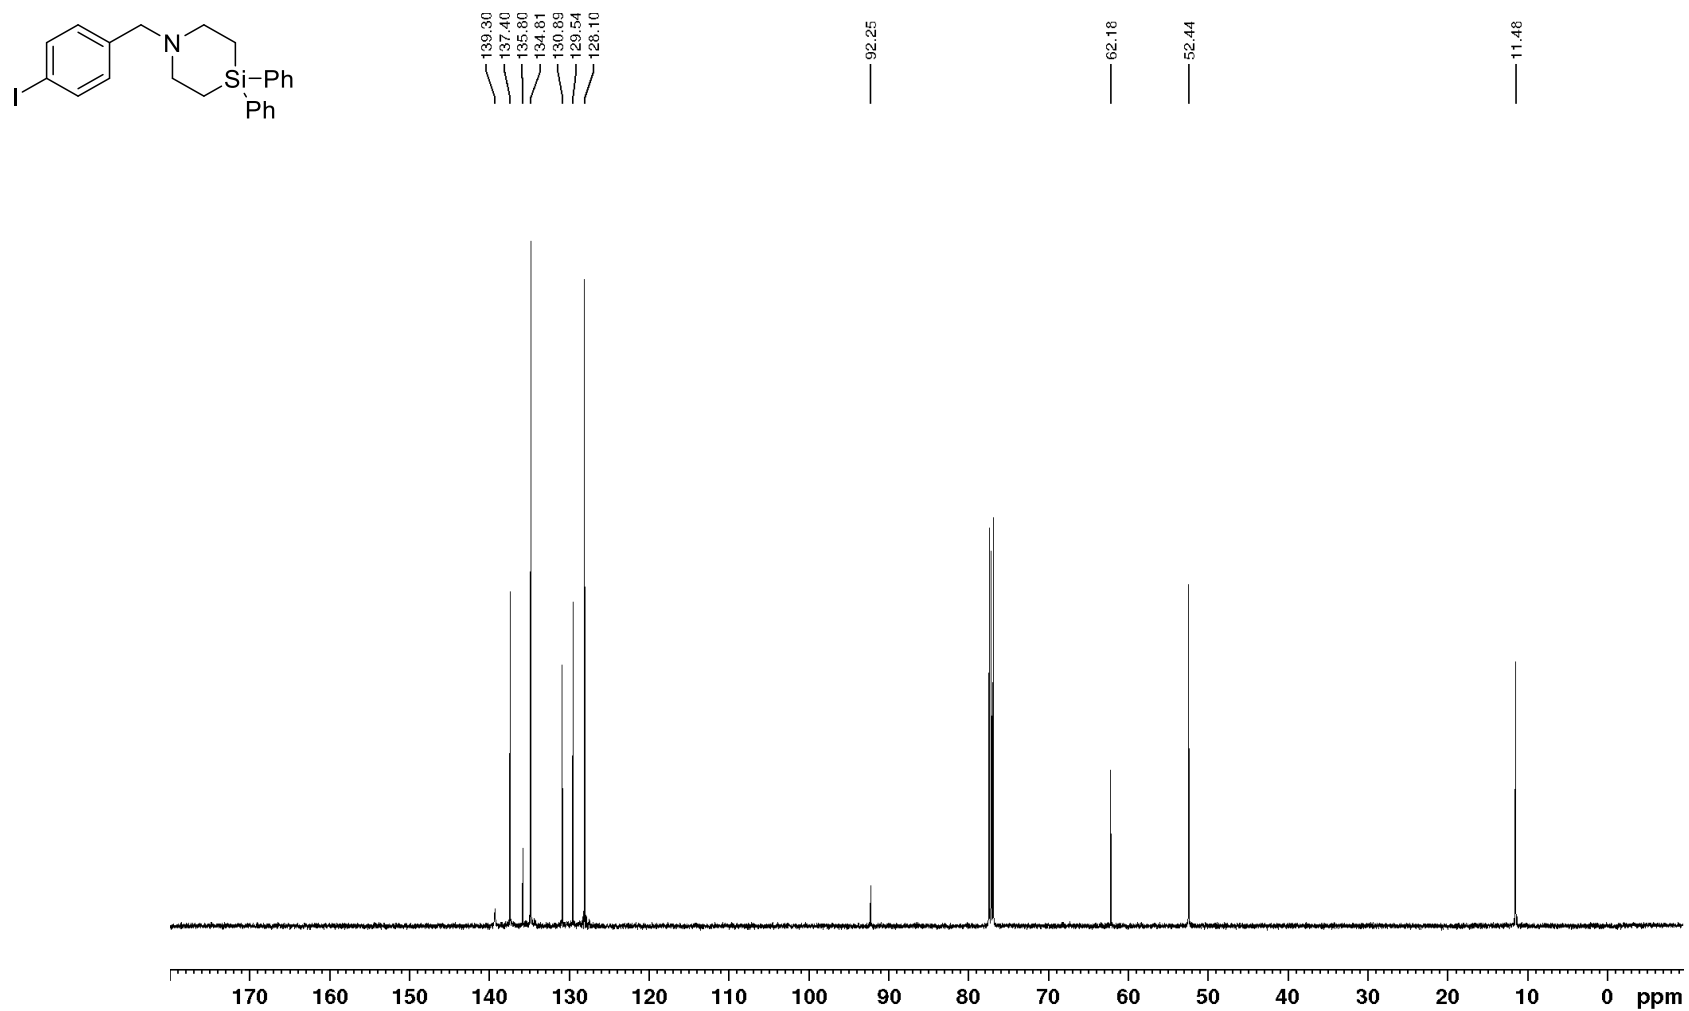



**Figure S35.**  $^1\text{H}/^{29}\text{Si}$  HMQC NMR (500/99 MHz,  $\text{CDCl}_3$ , 298 K, optimized for  $J = 7$  Hz) of **1-(4-iodobenzyl)-4,4-diphenyl-1,4-azasilinane (3ja)**.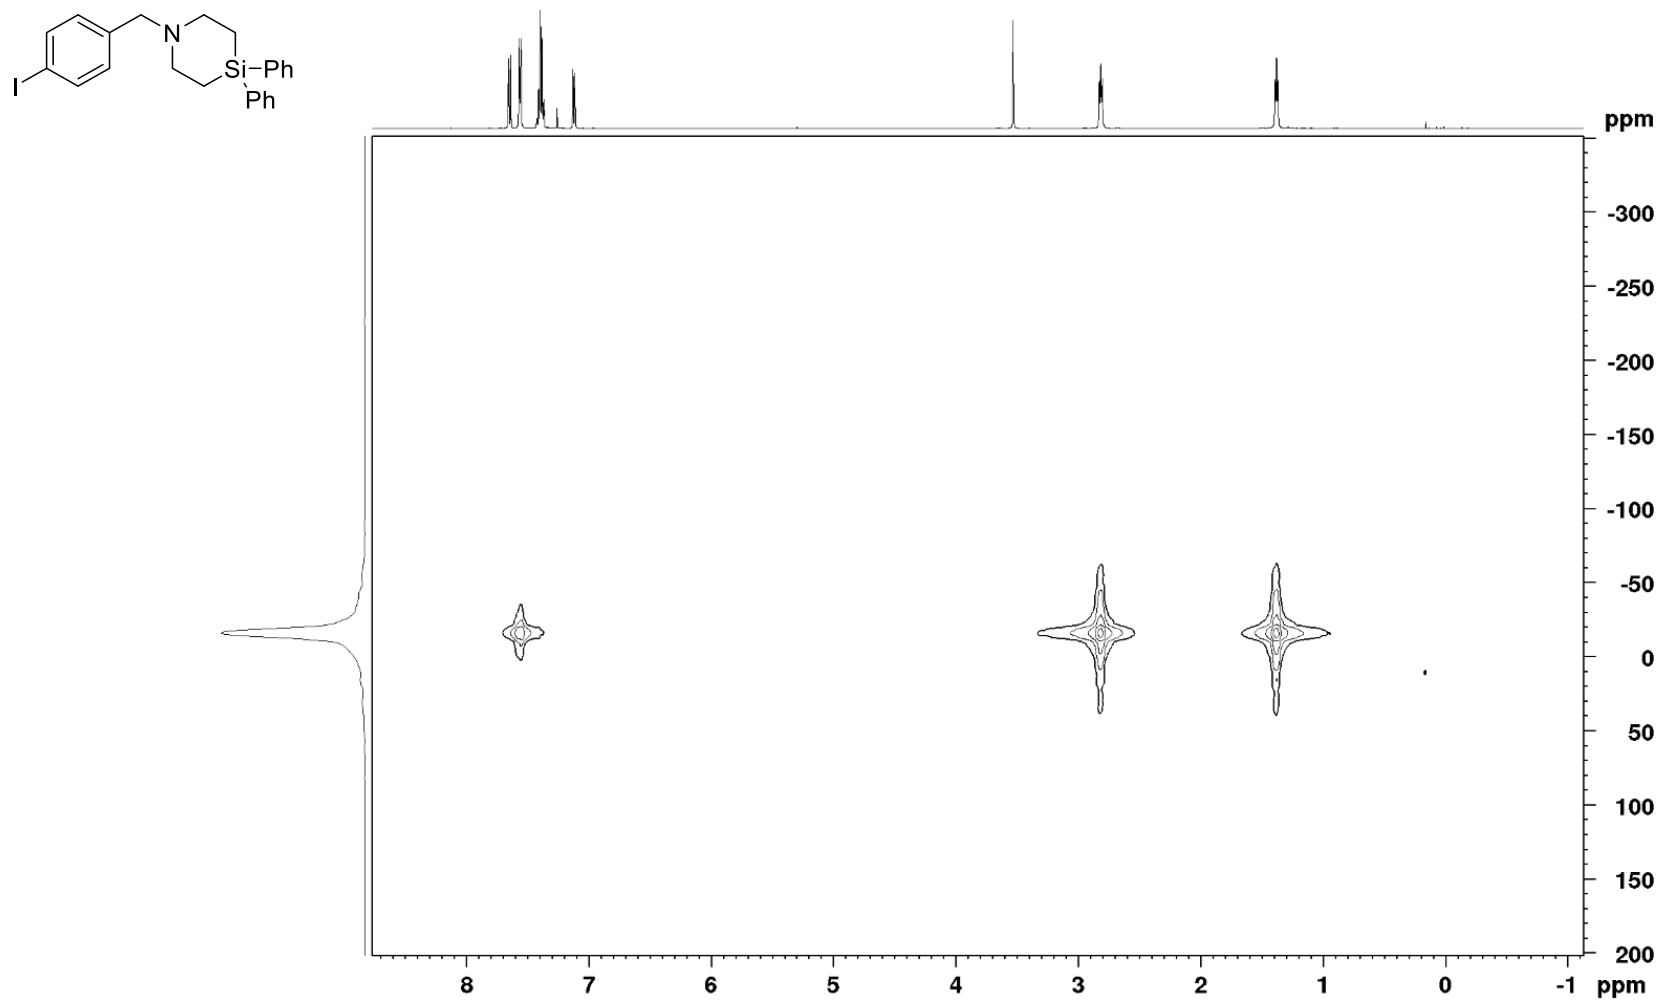

**Figure S36.**  $^1\text{H}$  NMR spectrum (500 MHz,  $\text{CDCl}_3$ , 298 K) of **4,4-diphenyl-1-(4-(trifluoromethyl)benzyl)-1,4-azasilinane (3ka)**.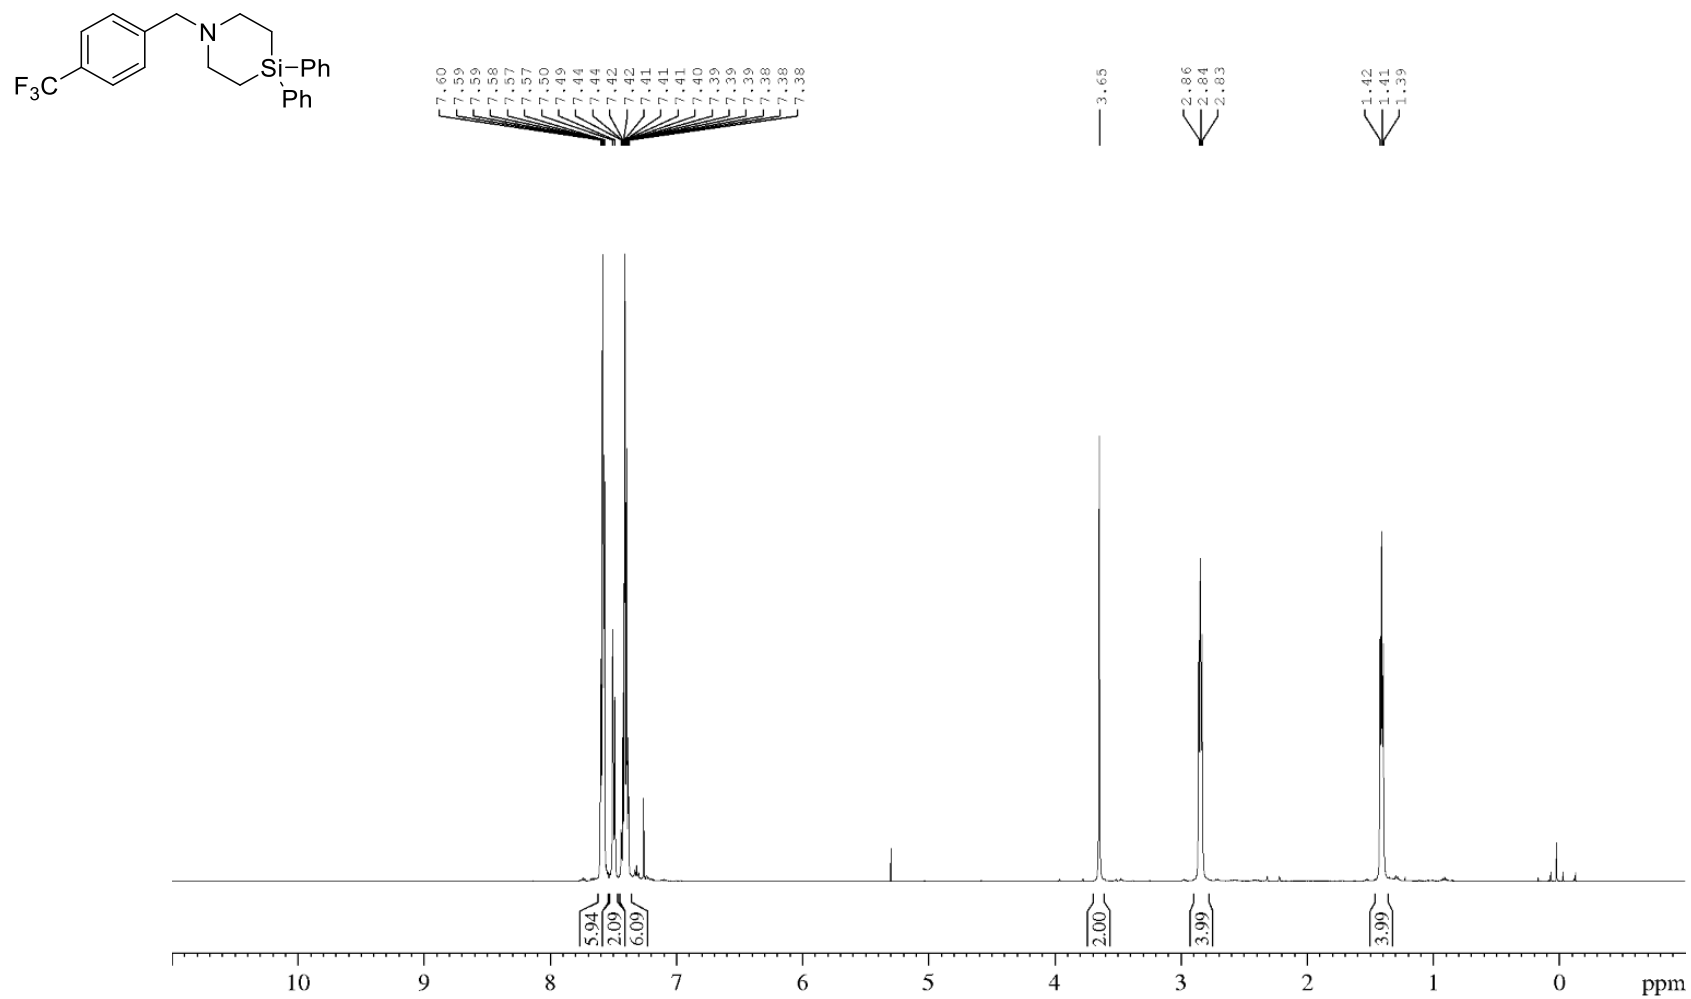

**Figure S37.**  $^{13}\text{C}$  NMR spectrum (125 MHz,  $\text{CDCl}_3$ , 298 K) of 4,4-diphenyl-1-(4-(trifluoromethyl)benzyl)-1,4-azasilinane (**3ka**).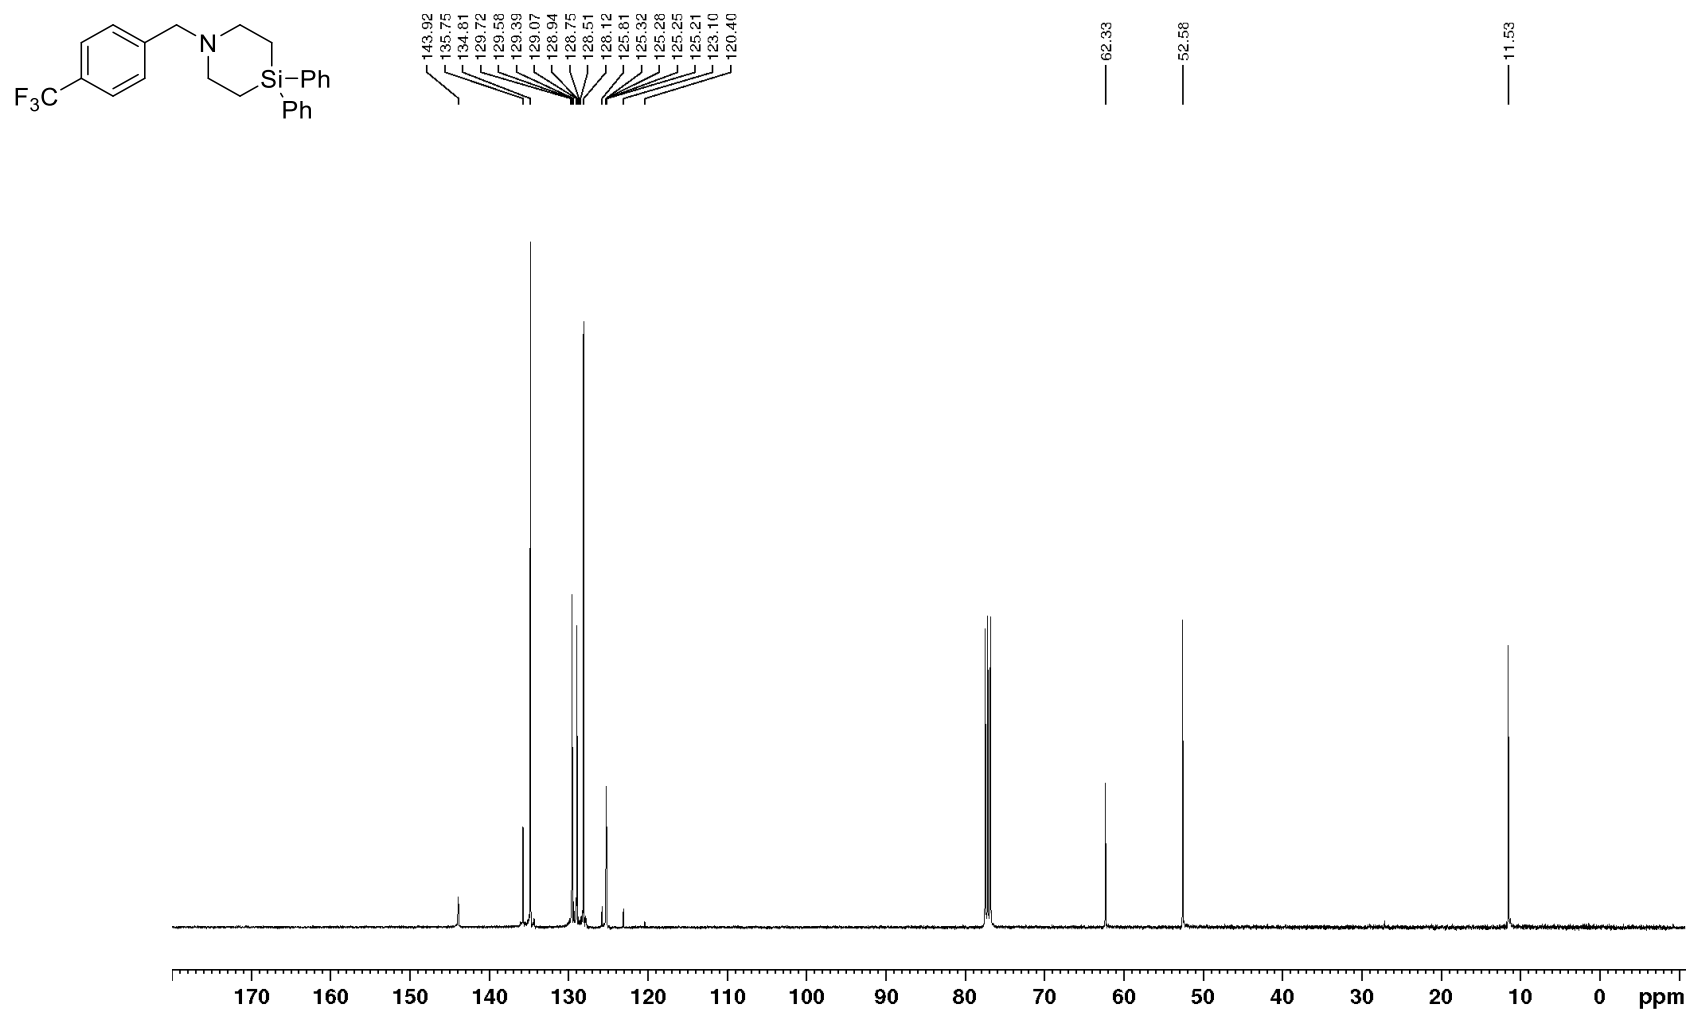

**Figure S38.**  $^{19}\text{F}$  NMR spectrum (471 MHz,  $\text{CDCl}_3$ , 298 K) of **4,4-diphenyl-1-(4-(trifluoromethyl)benzyl)-1,4-azasilinane (3ka)**.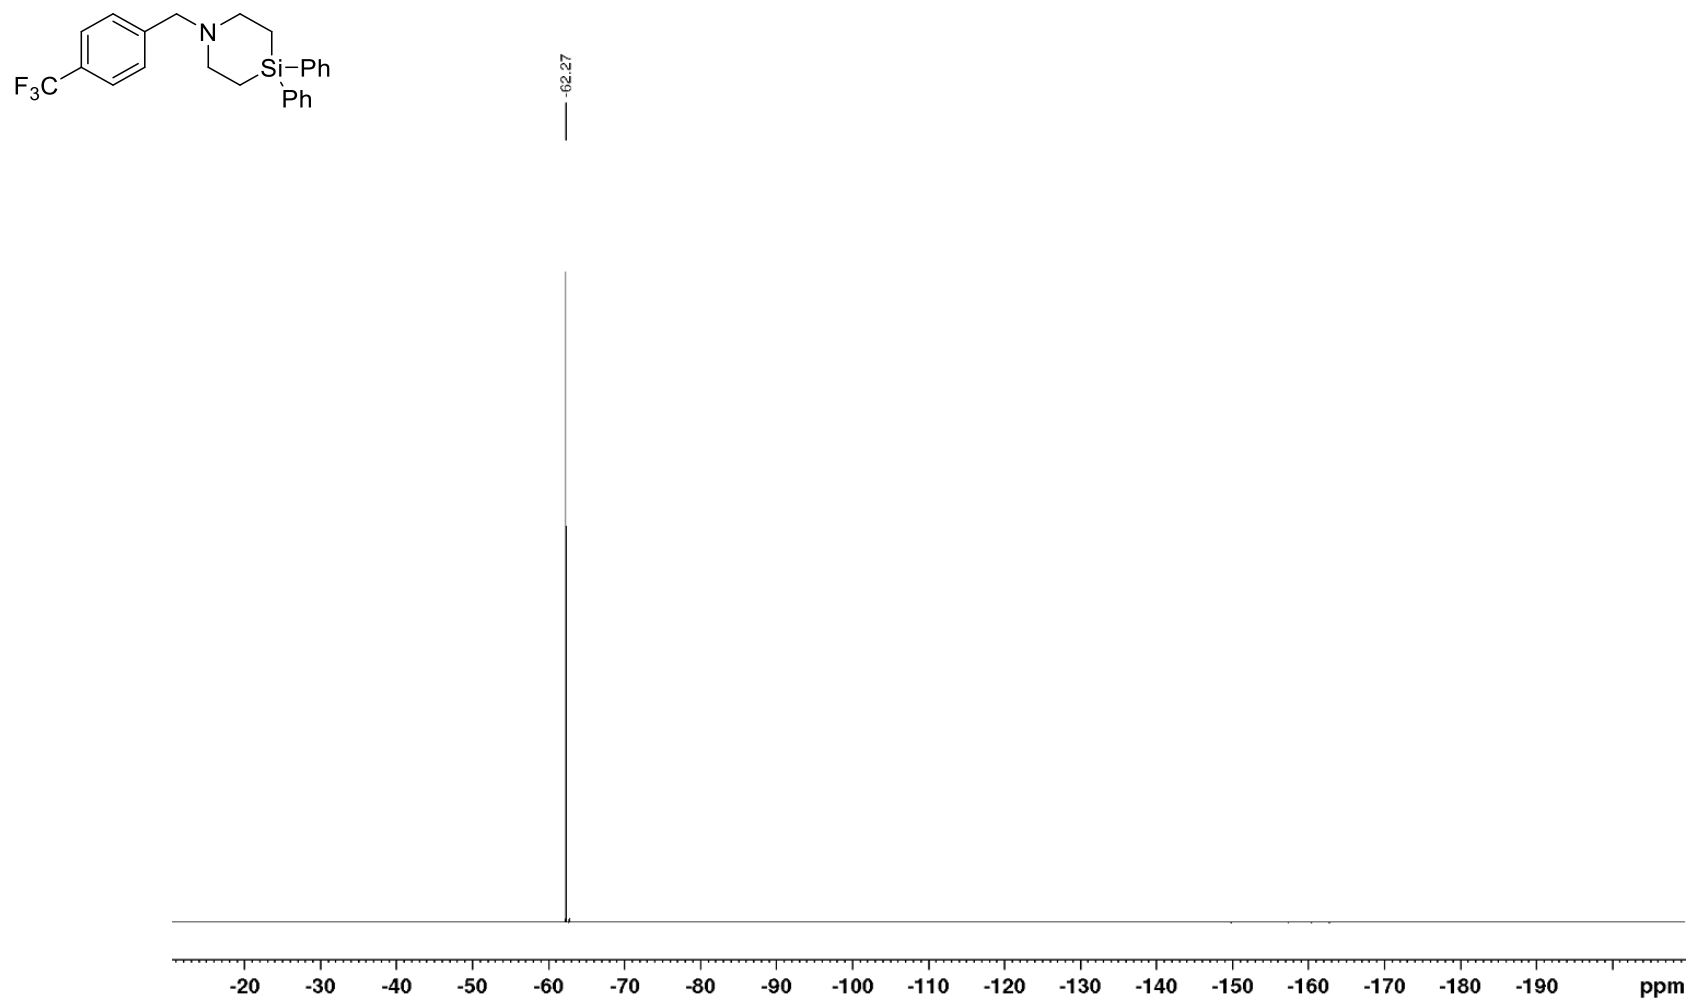

**Figure S39.**  $^1\text{H}/^{29}\text{Si}$  HMQC NMR (500/99 MHz,  $\text{CDCl}_3$ , 298 K, optimized for  $J = 7$  Hz) of **4,4-diphenyl-1-(4-(trifluoromethyl)benzyl)-1,4-azasilinane (3ka)**.

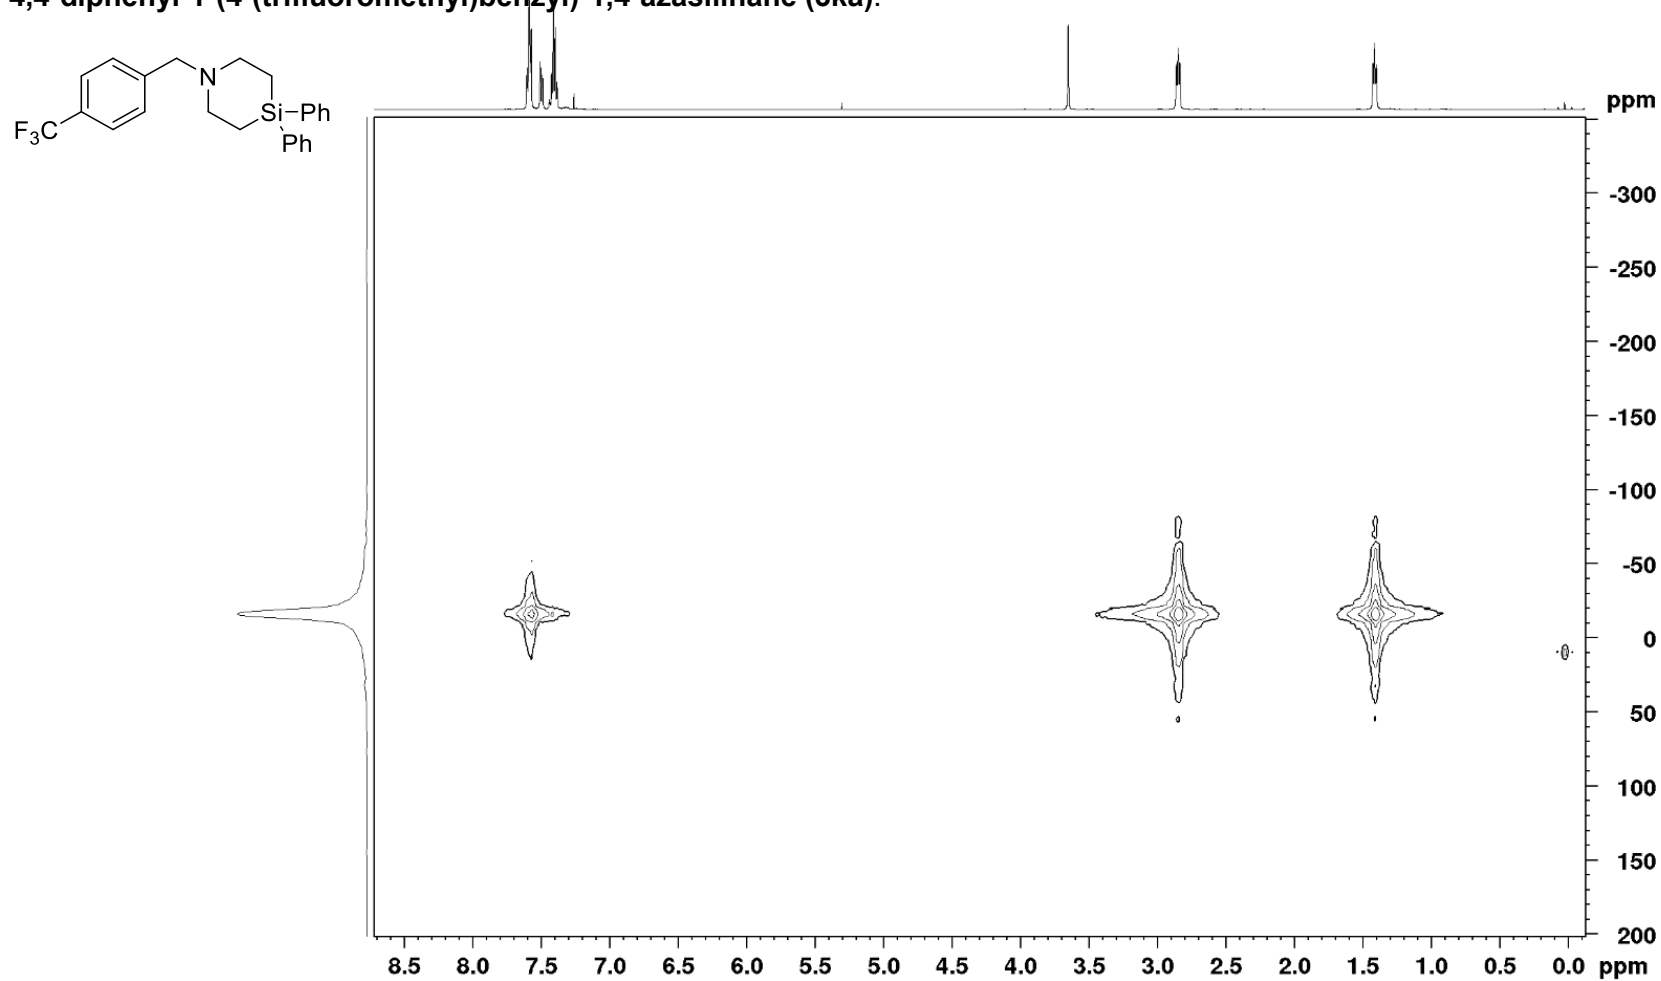

**Figure S40.**  $^1\text{H}$  NMR spectrum (500 MHz,  $\text{CDCl}_3$ , 298 K) of **3-((4,4-diphenyl-1,4-azasilinan-1-yl)methyl)phenol (3la)**.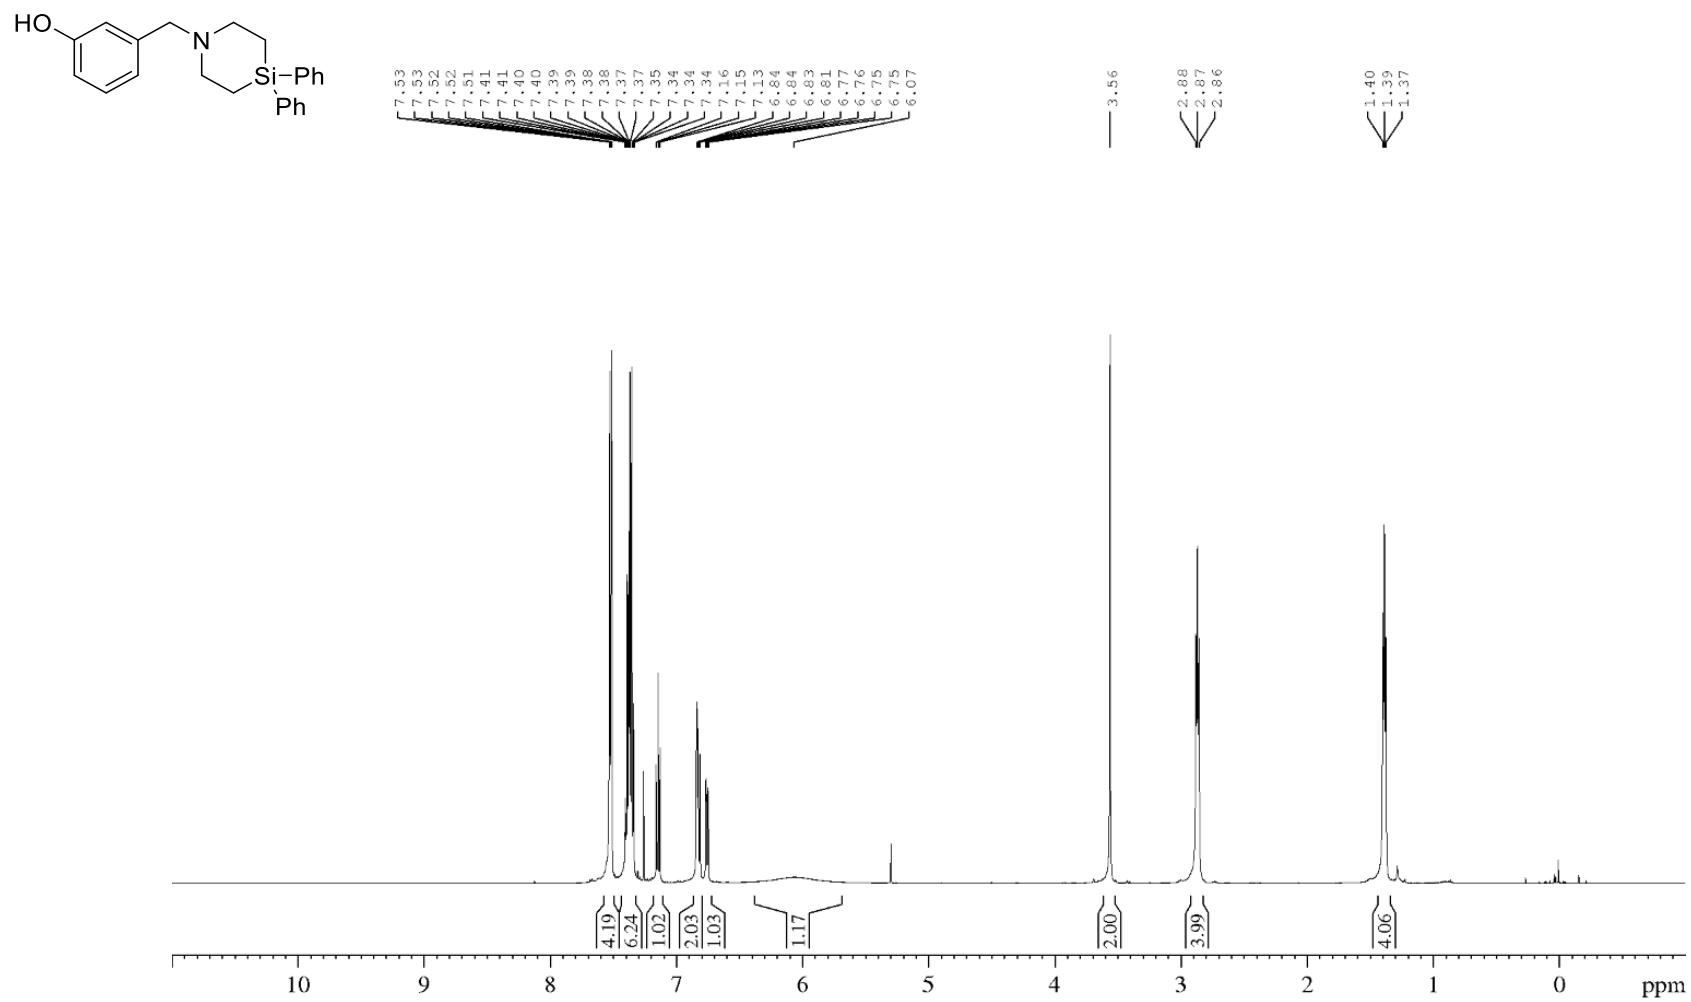

**Figure S41.**  $^{13}\text{C}$  NMR spectrum (125 MHz,  $\text{CDCl}_3$ , 298 K) of **3-((4,4-diphenyl-1,4-azasilinan-1-yl)methyl)phenol (3la)**.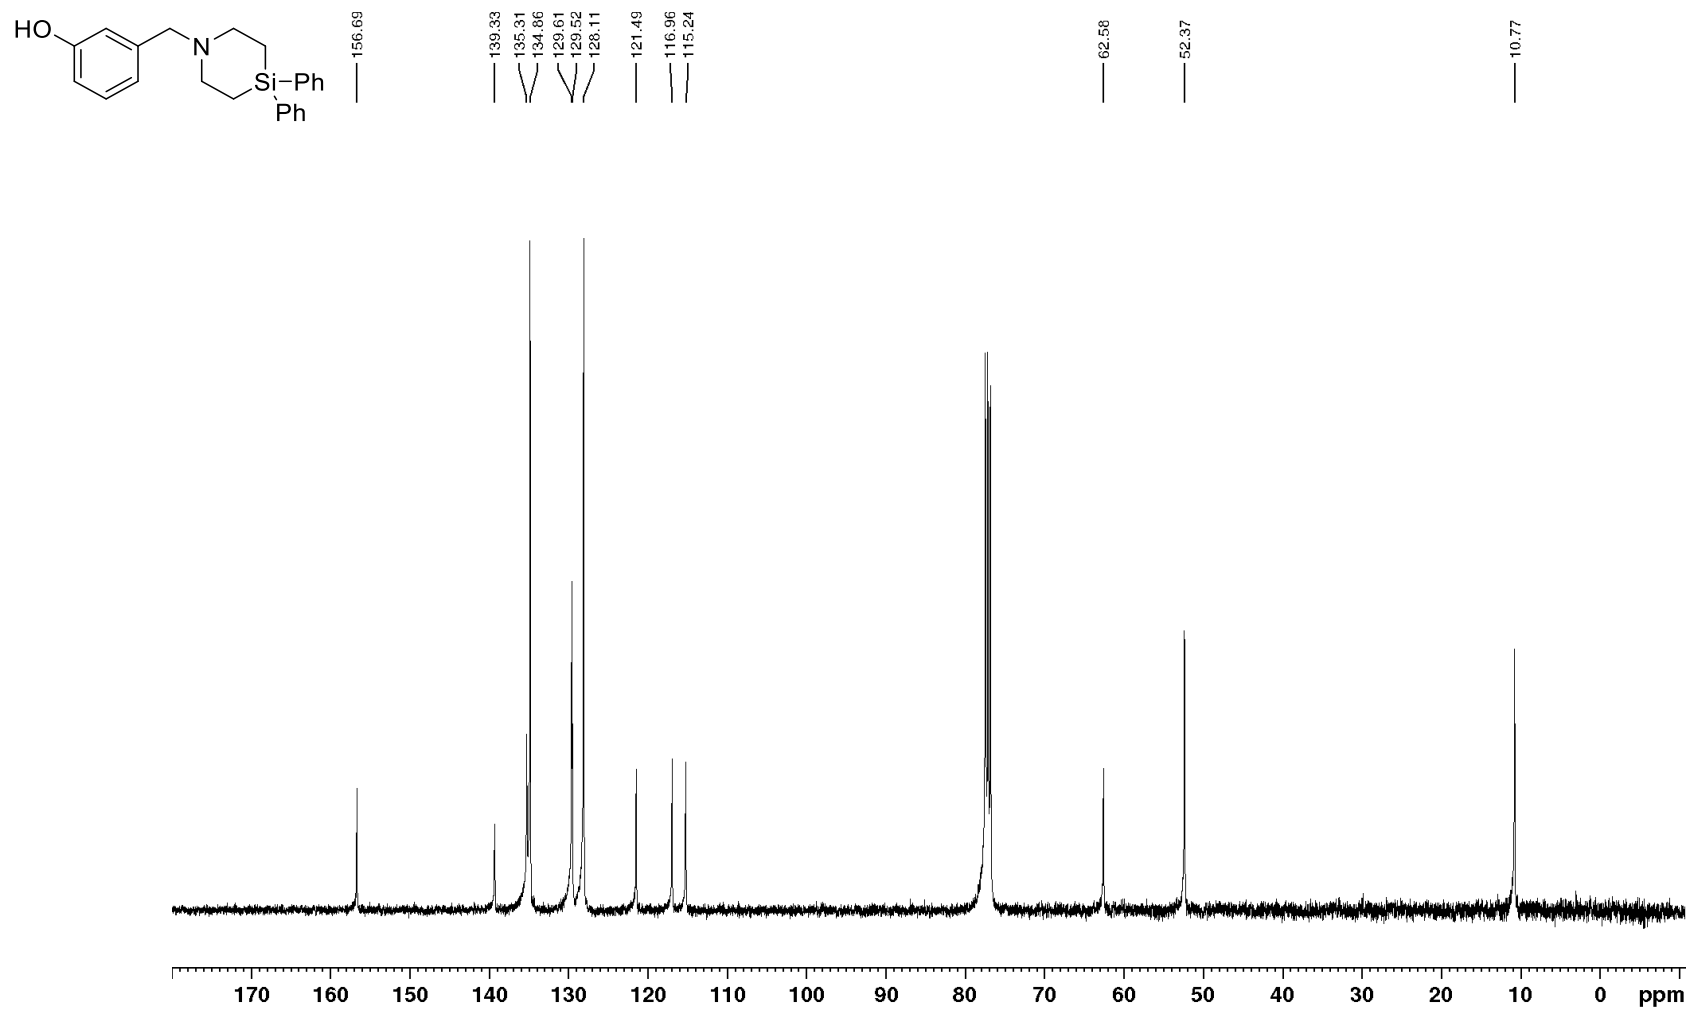

**Figure S42.**  $^1\text{H}/^{29}\text{Si}$  HMQC NMR (500/99 MHz,  $\text{CDCl}_3$ , 298 K, optimized for  $J = 7$  Hz) of **3-((4,4-diphenyl-1,4-azasilinan-1-yl)methyl)phenol** (**3la**).

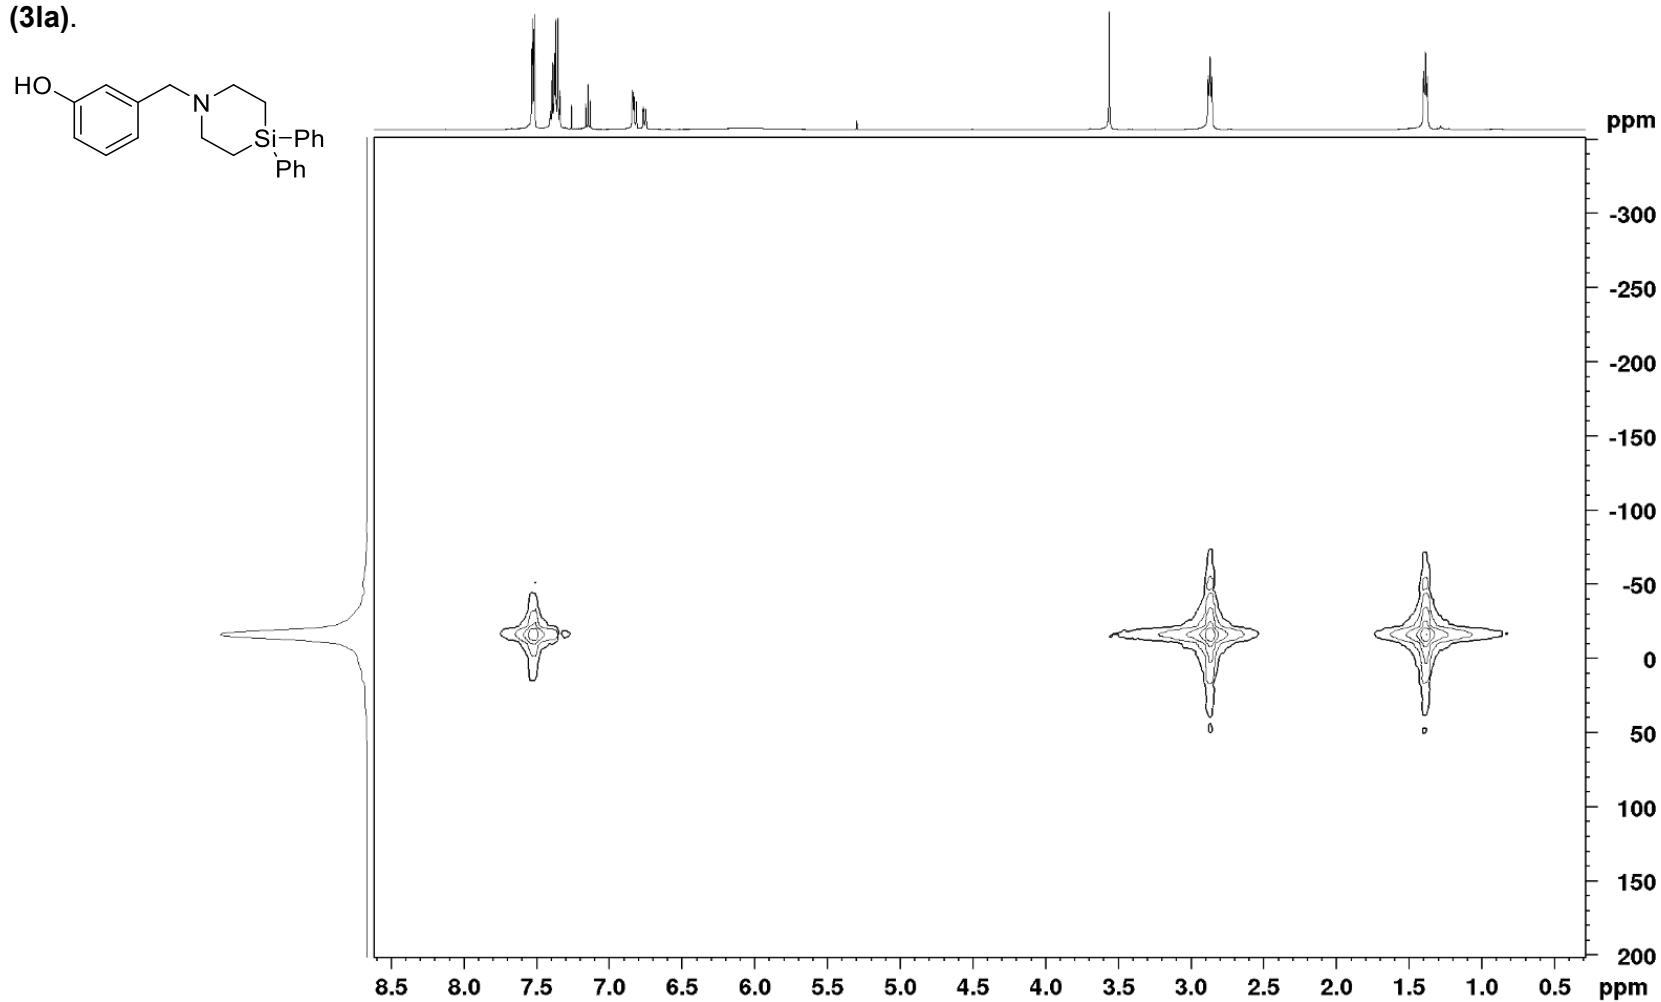



**Figure S43.**  $^1\text{H}$  NMR spectrum (500 MHz,  $\text{CDCl}_3$ , 298 K) of **1-(naphthalen-2-ylmethyl)-4,4-diphenyl-1,4-azasilinane (3ma)**.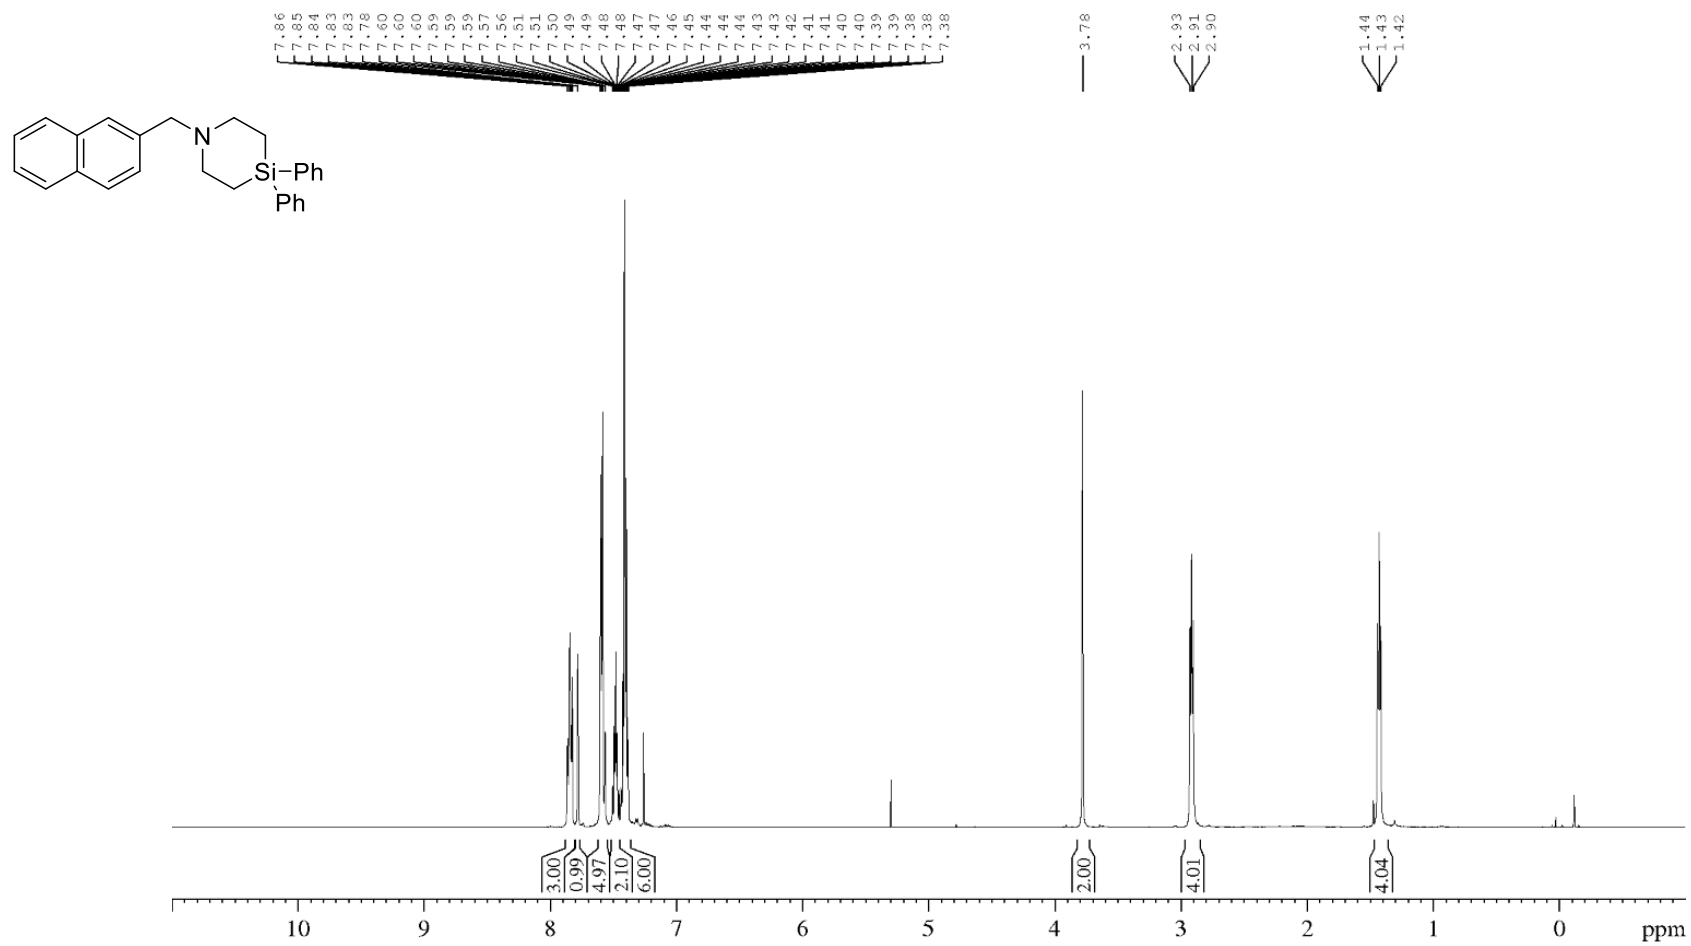

**Figure S44.**  $^{13}\text{C}$  NMR spectrum (125 MHz,  $\text{CDCl}_3$ , 298 K) of 1-(naphthalen-2-ylmethyl)-4,4-diphenyl-1,4-azasilinane (**3ma**).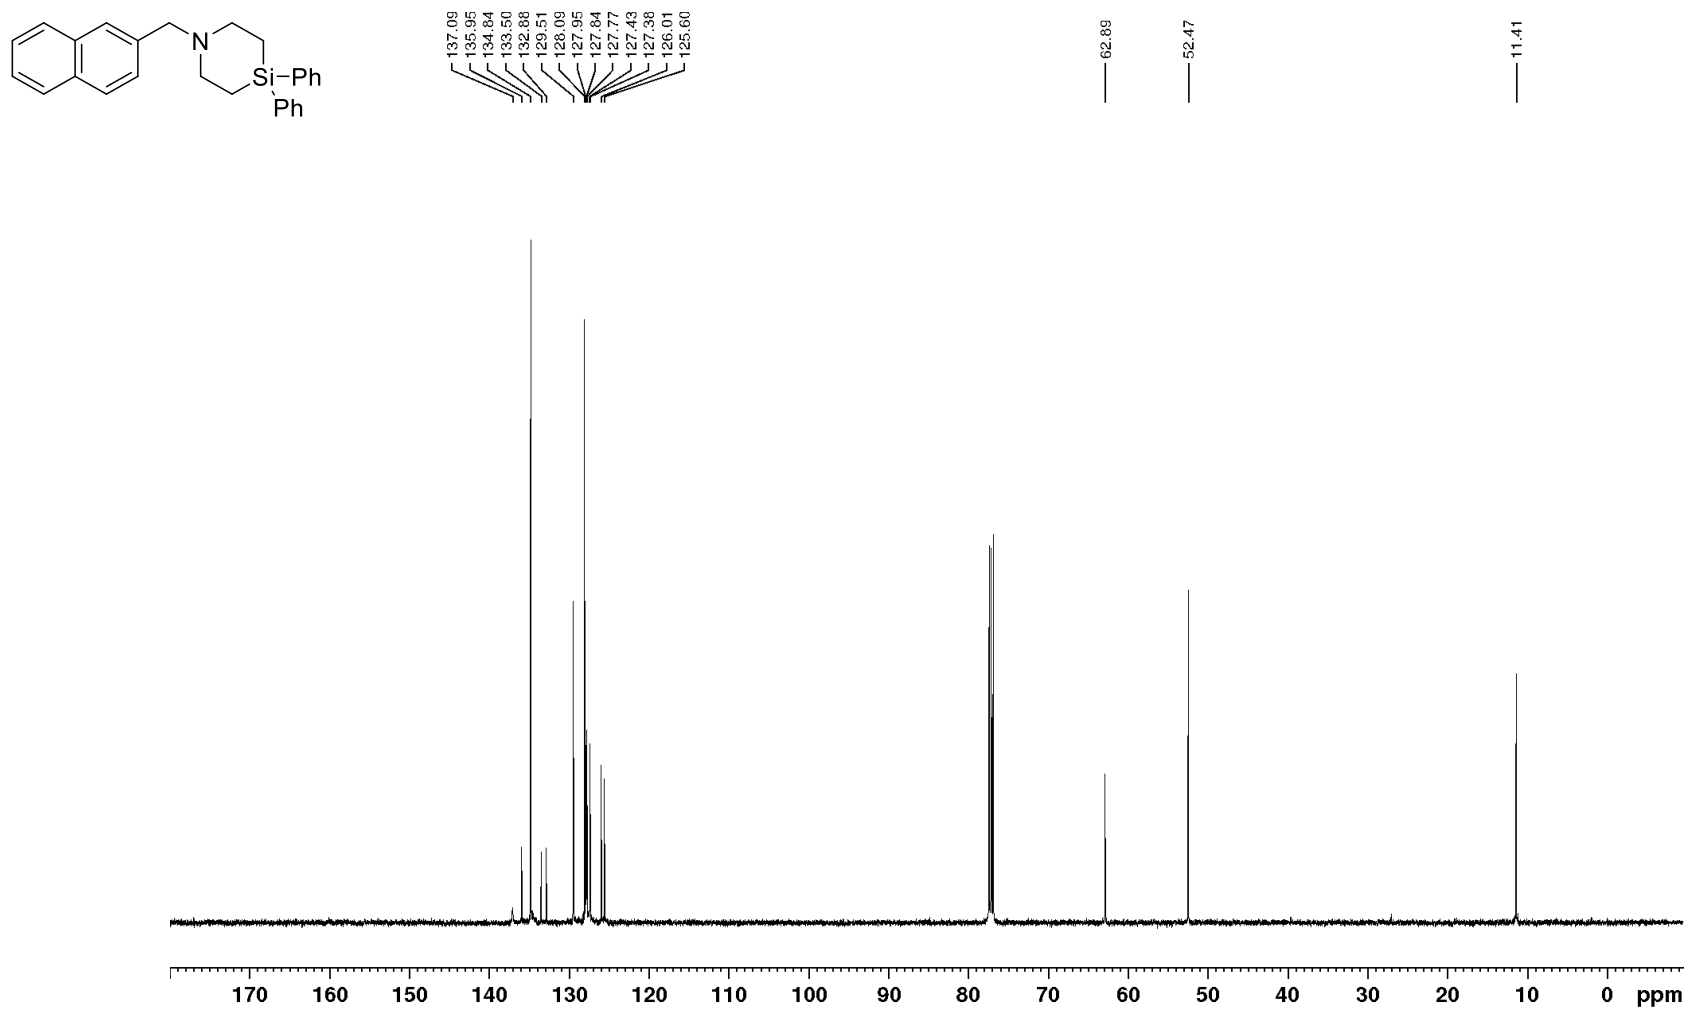

**Figure S45.**  $^1\text{H}/^{29}\text{Si}$  HMQC NMR (500/99 MHz,  $\text{CDCl}_3$ , 298 K, optimized for  $J = 7$  Hz) of **1-(naphthalen-2-ylmethyl)-4,4-diphenyl-1,4-azasilinane (3ma)**.

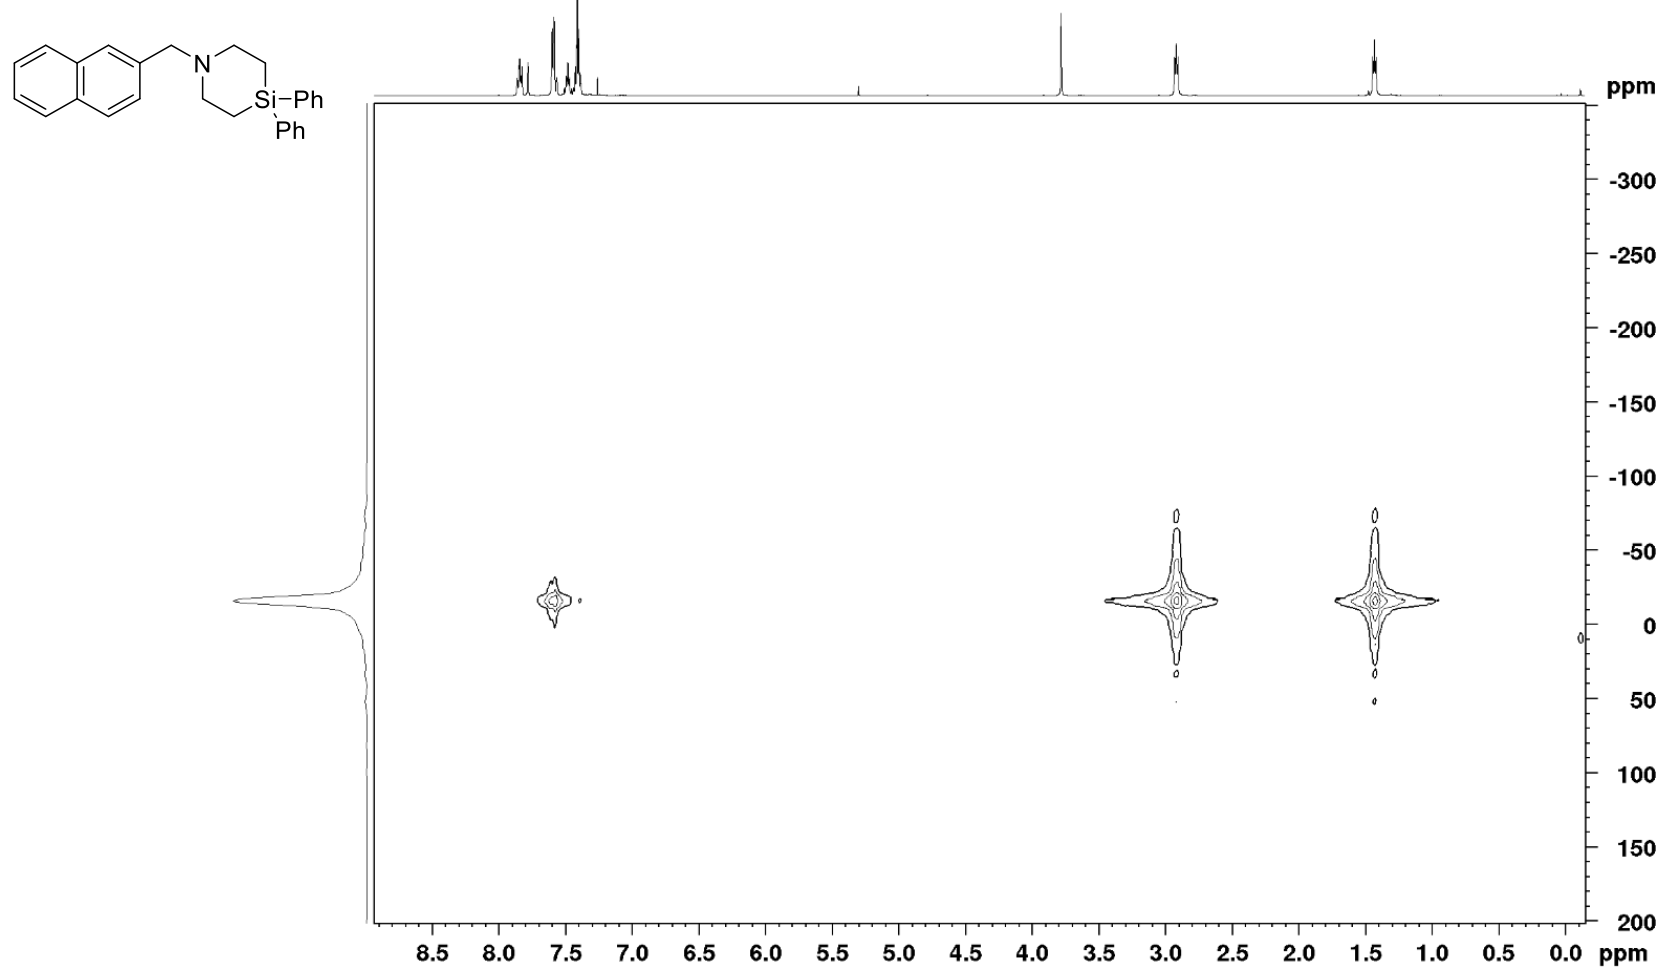

**Figure S46.**  $^1\text{H}$  NMR spectrum (500 MHz,  $\text{CDCl}_3$ , 298 K) of **1,4-bis((4,4-diphenyl-1,4-azasilinan-1-yl)methyl)benzene (3na)**.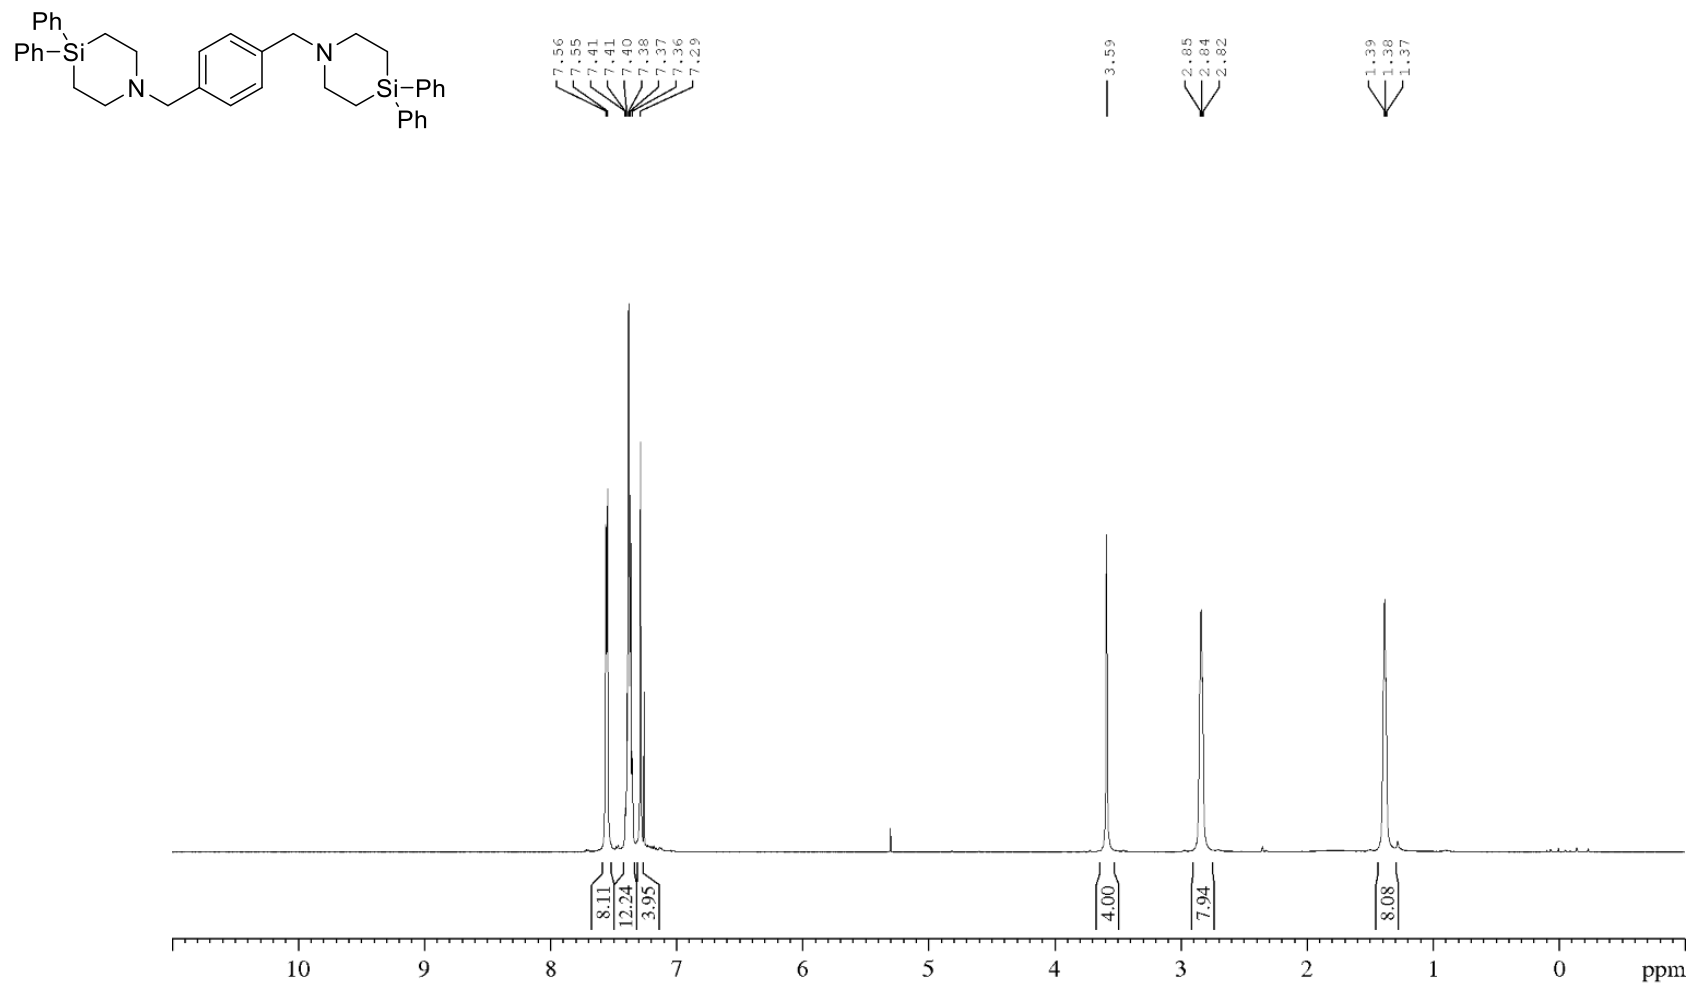

**Figure S47.**  $^{13}\text{C}$  NMR spectrum (125 MHz,  $\text{CDCl}_3$ , 298 K) of **1,4-bis((4,4-diphenyl-1,4-azasilinan-1-yl)methyl)benzene (3na)**.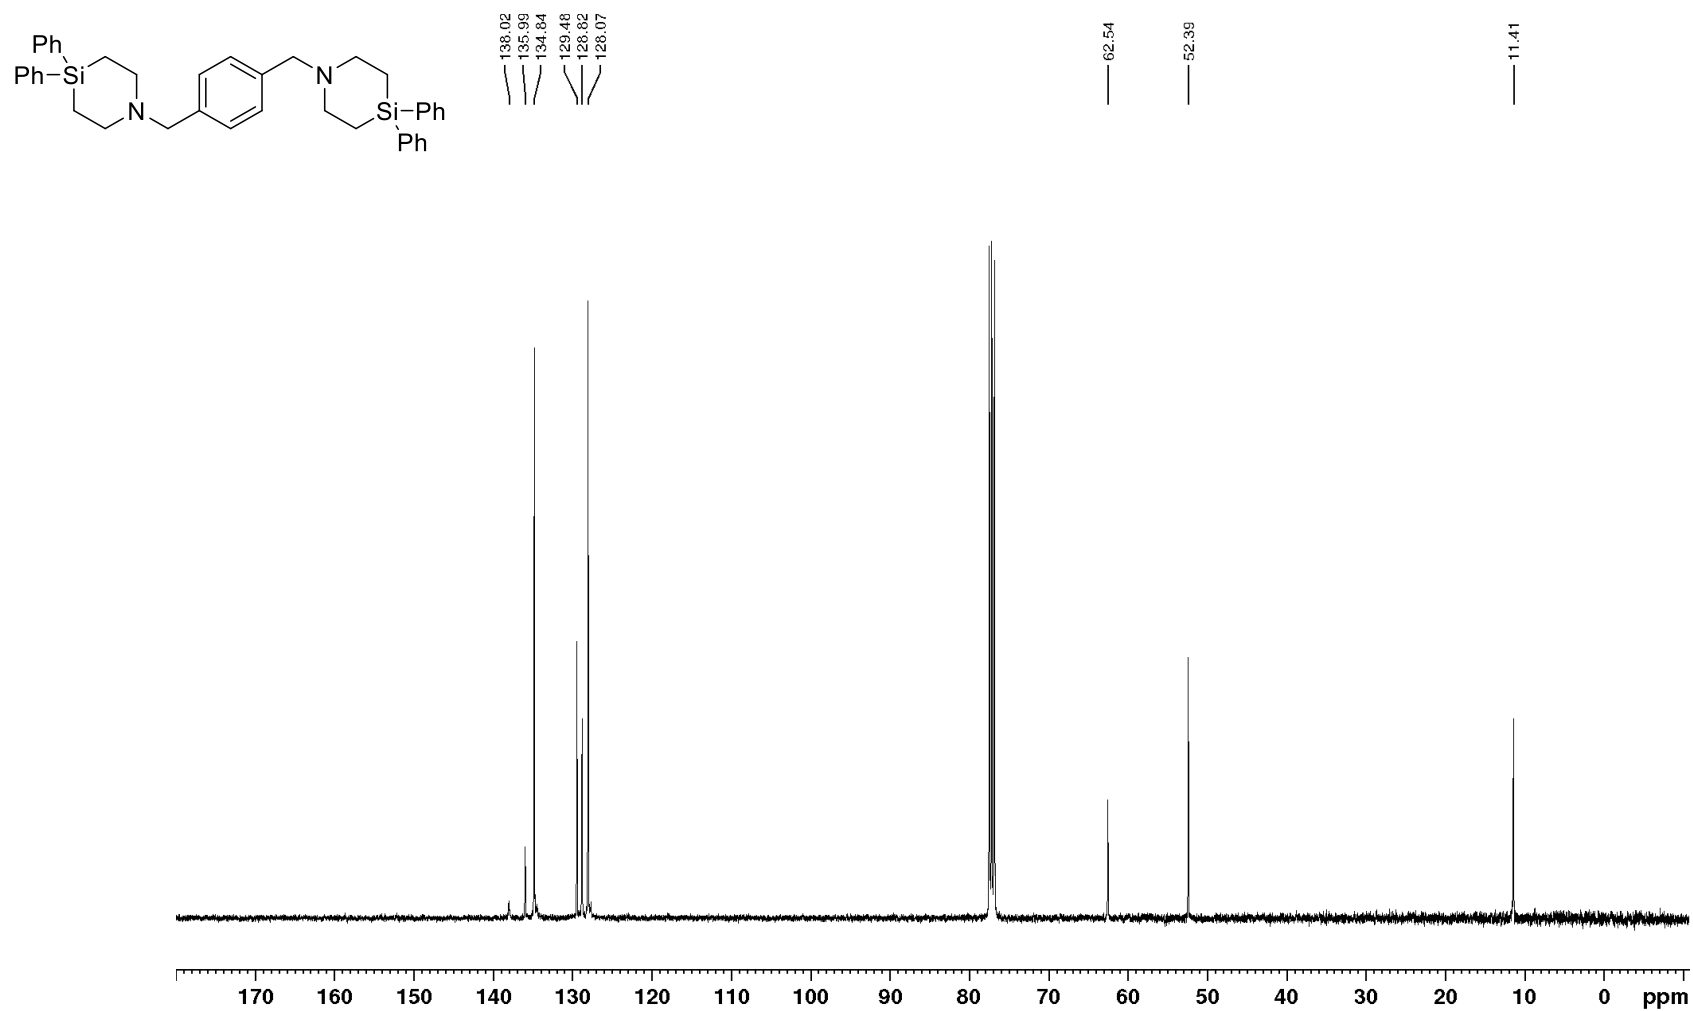

**Figure S48.**  $^1\text{H}/^{29}\text{Si}$  HMQC NMR (500/99 MHz,  $\text{CDCl}_3$ , 298 K, optimized for  $J = 7$  Hz) of 1,4-bis((4,4-diphenyl-1,4-azasilinan-1-yl)methyl)benzene (**3na**).

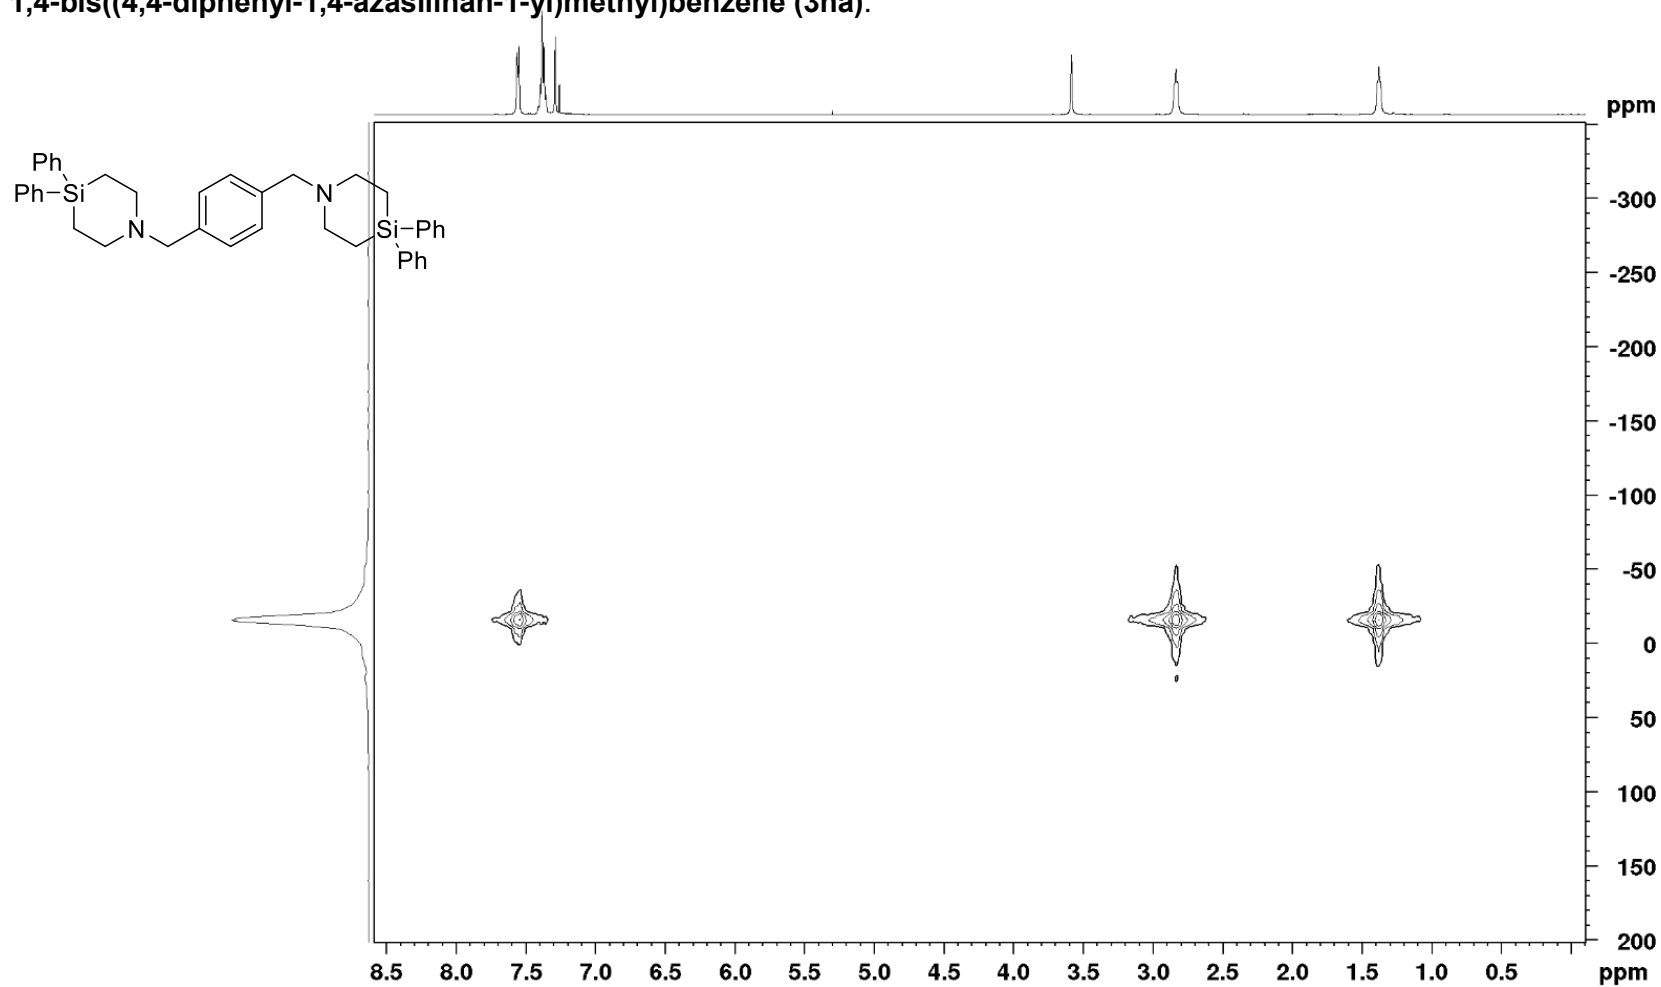

**Figure S49.**  $^1\text{H}$  NMR spectrum (500 MHz,  $\text{CDCl}_3$ , 298 K) of **1-cyclohexyl-4,4-diphenyl-1,4-azasilinane (3oa)**.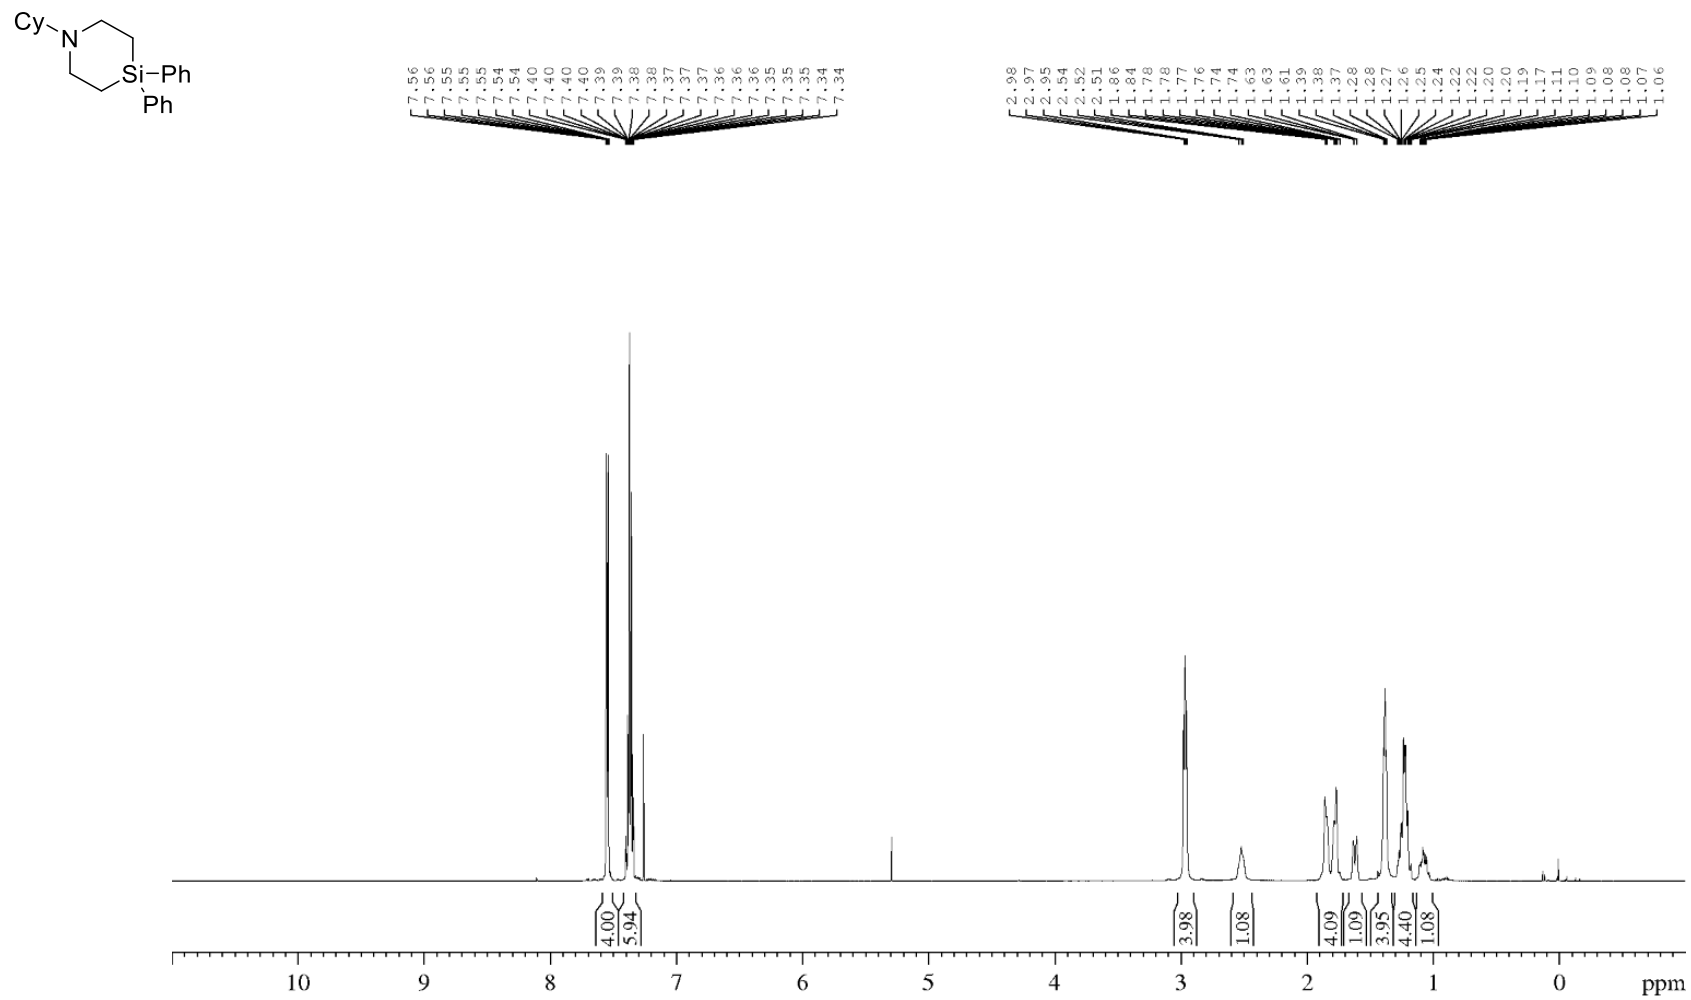

**Figure S50.**  $^{13}\text{C}$  NMR spectrum (125 MHz,  $\text{CDCl}_3$ , 298 K) of **1-cyclohexyl-4,4-diphenyl-1,4-azasilinane (3oa)**.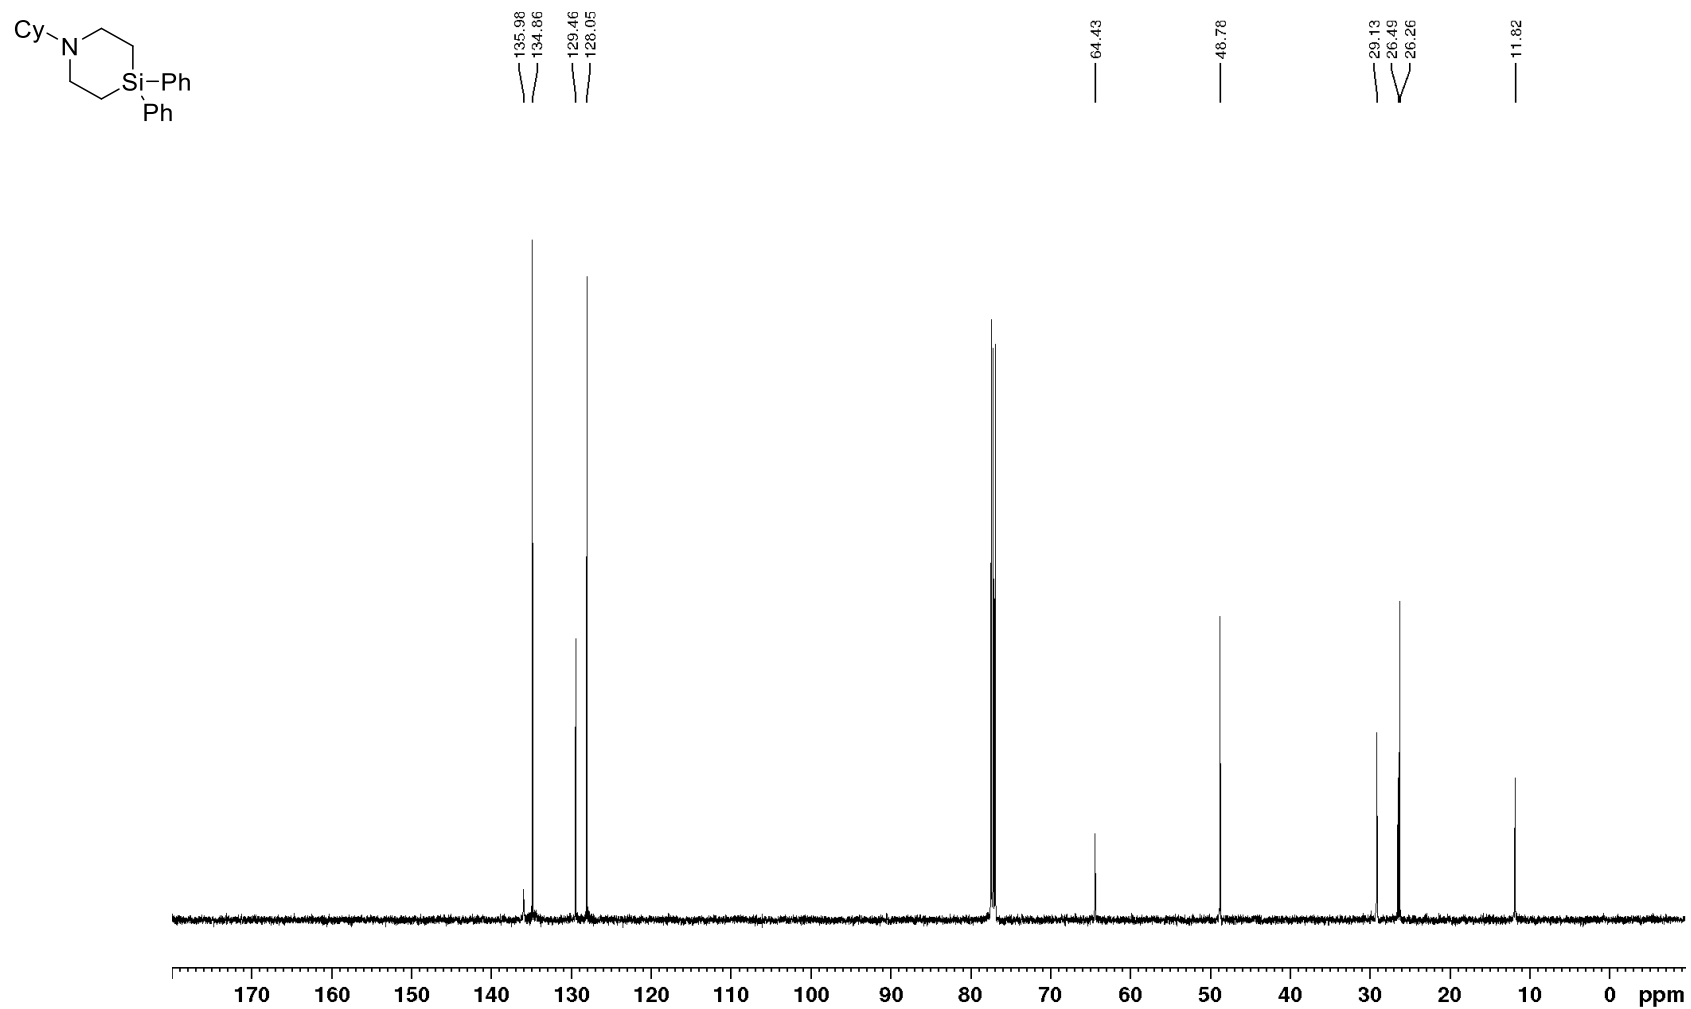



**Figure S51.**  $^1\text{H}/^{29}\text{Si}$  HMQC NMR (500/99 MHz,  $\text{CDCl}_3$ , 298 K, optimized for  $J = 7$  Hz) of **1-cyclohexyl-4,4-diphenyl-1,4-azasilinane (3oa)**.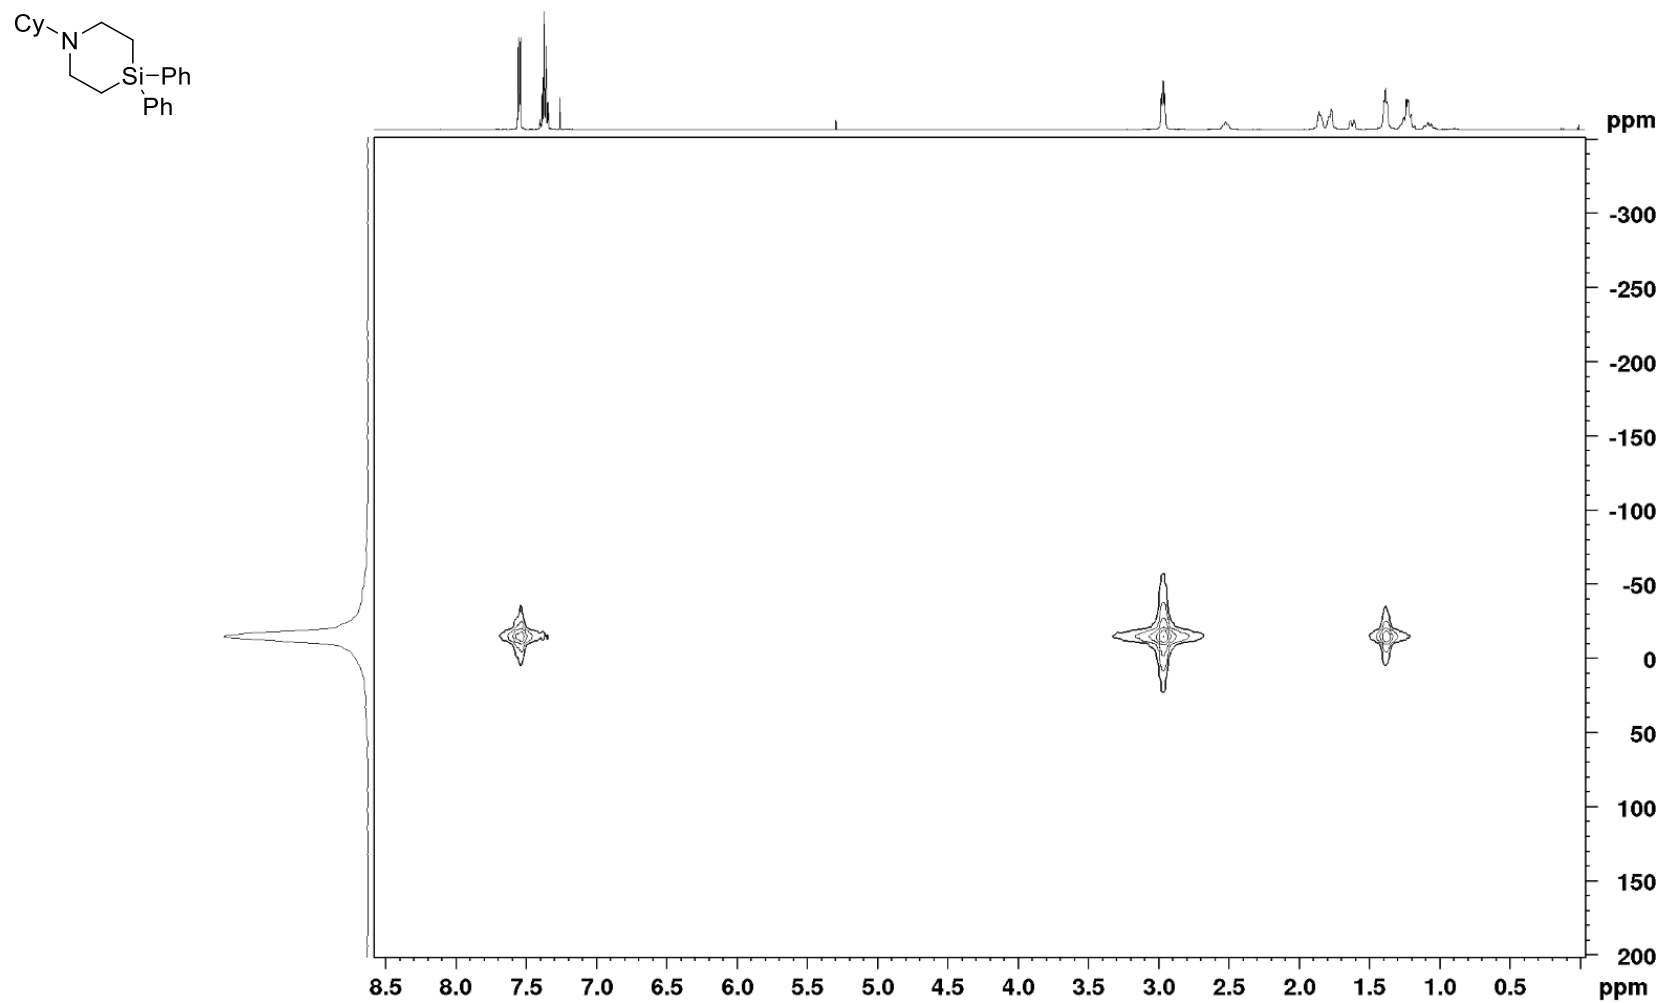

**Figure S52.**  $^1\text{H}$  NMR spectrum (500 MHz,  $\text{CDCl}_3$ , 298 K) of **1-ethyl-4,4-diphenyl-1,4-azasilinane (3pa)**.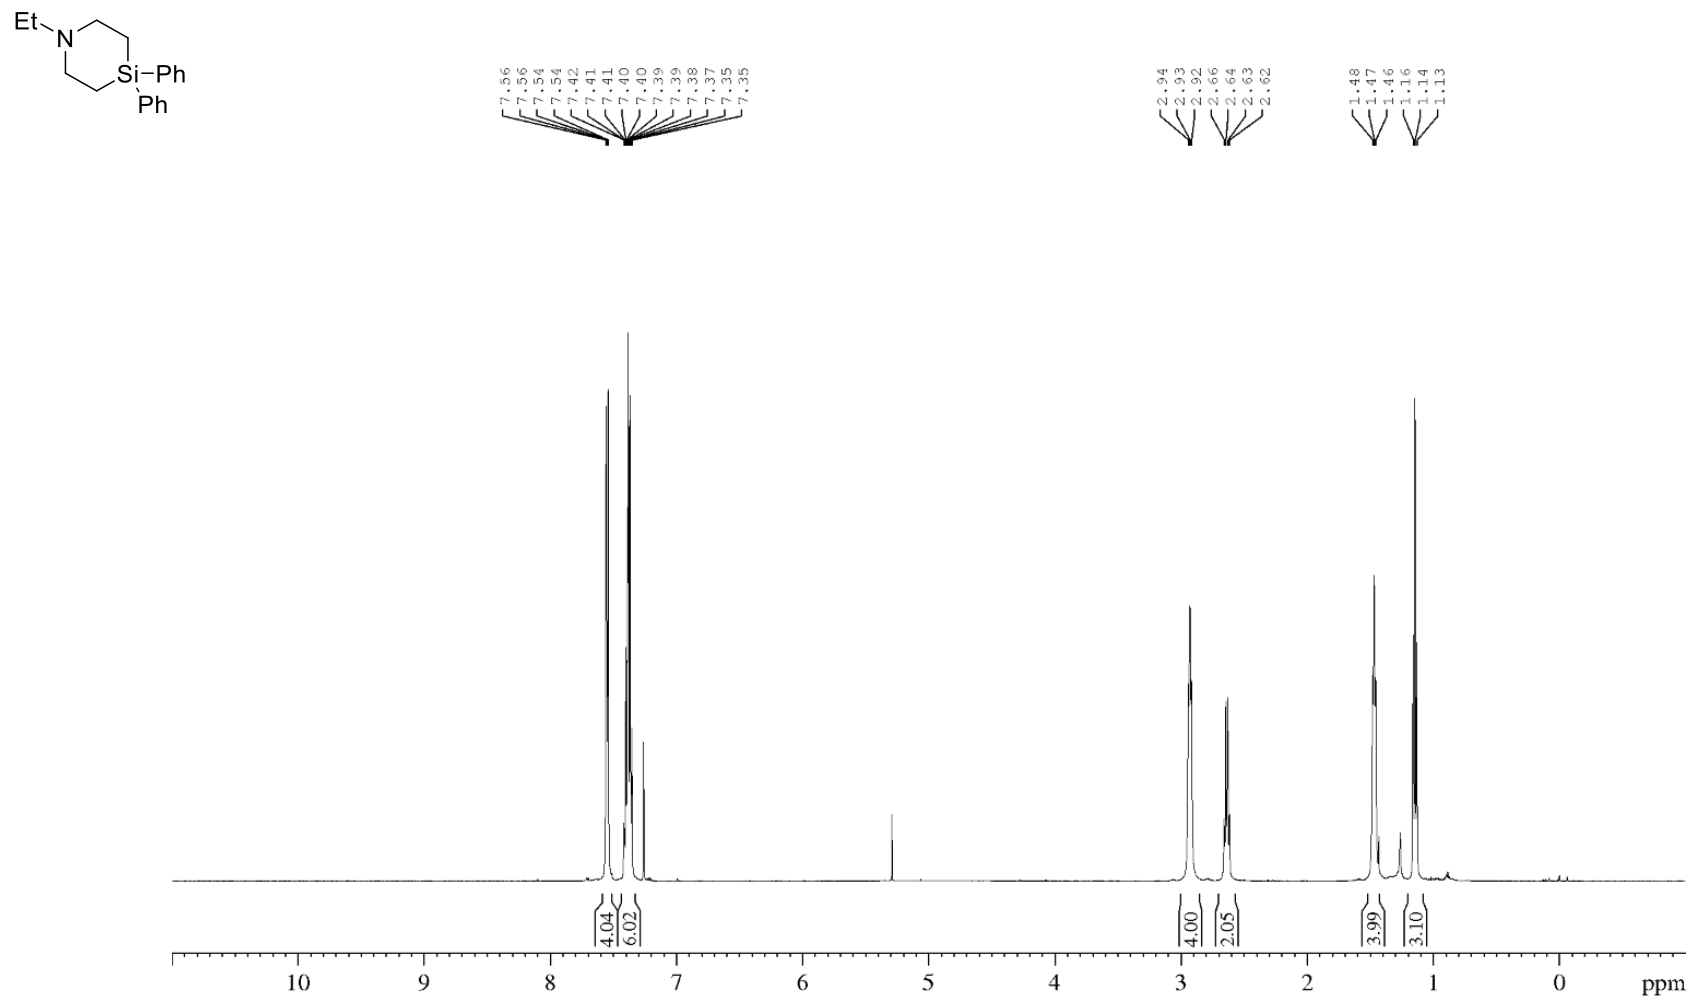

**Figure S53.**  $^{13}\text{C}$  NMR spectrum (125 MHz,  $\text{CDCl}_3$ , 298 K) of 1-ethyl-4,4-diphenyl-1,4-azasilinane (**3pa**).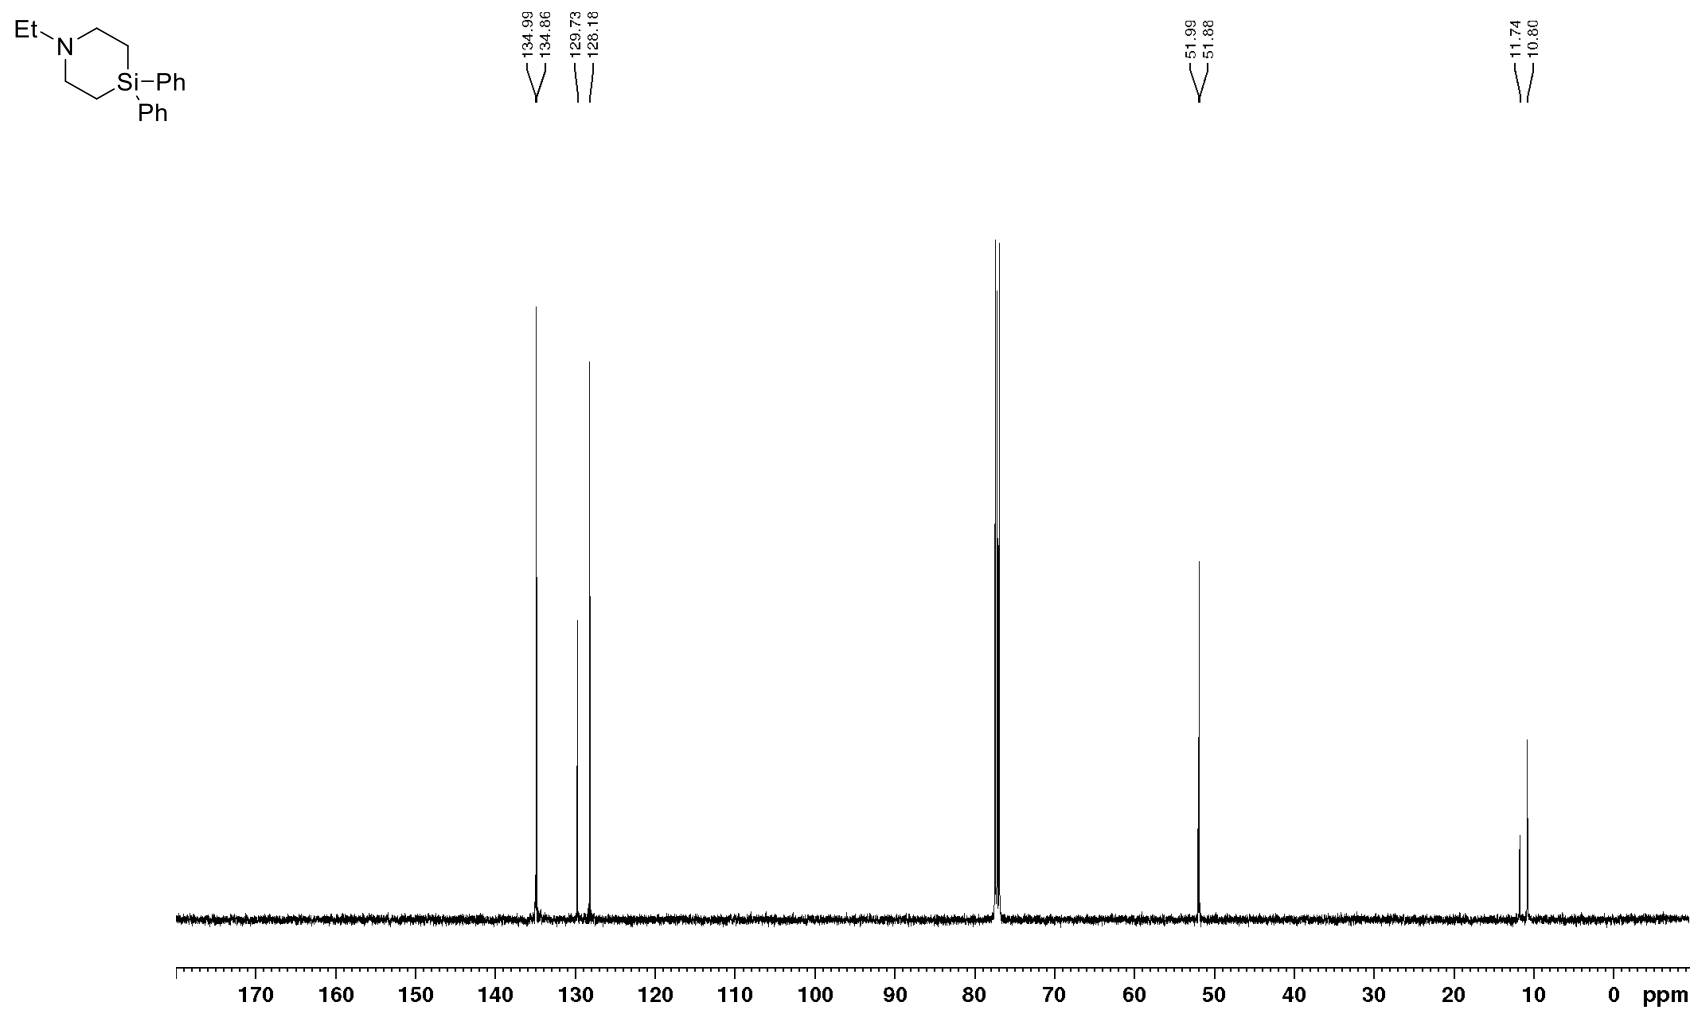

**Figure S54.**  $^1\text{H}/^{29}\text{Si}$  HMQC NMR (500/99 MHz,  $\text{CDCl}_3$ , 298 K, optimized for  $J = 7$  Hz) of **1-ethyl-4,4-diphenyl-1,4-azasilinane (3pa)**.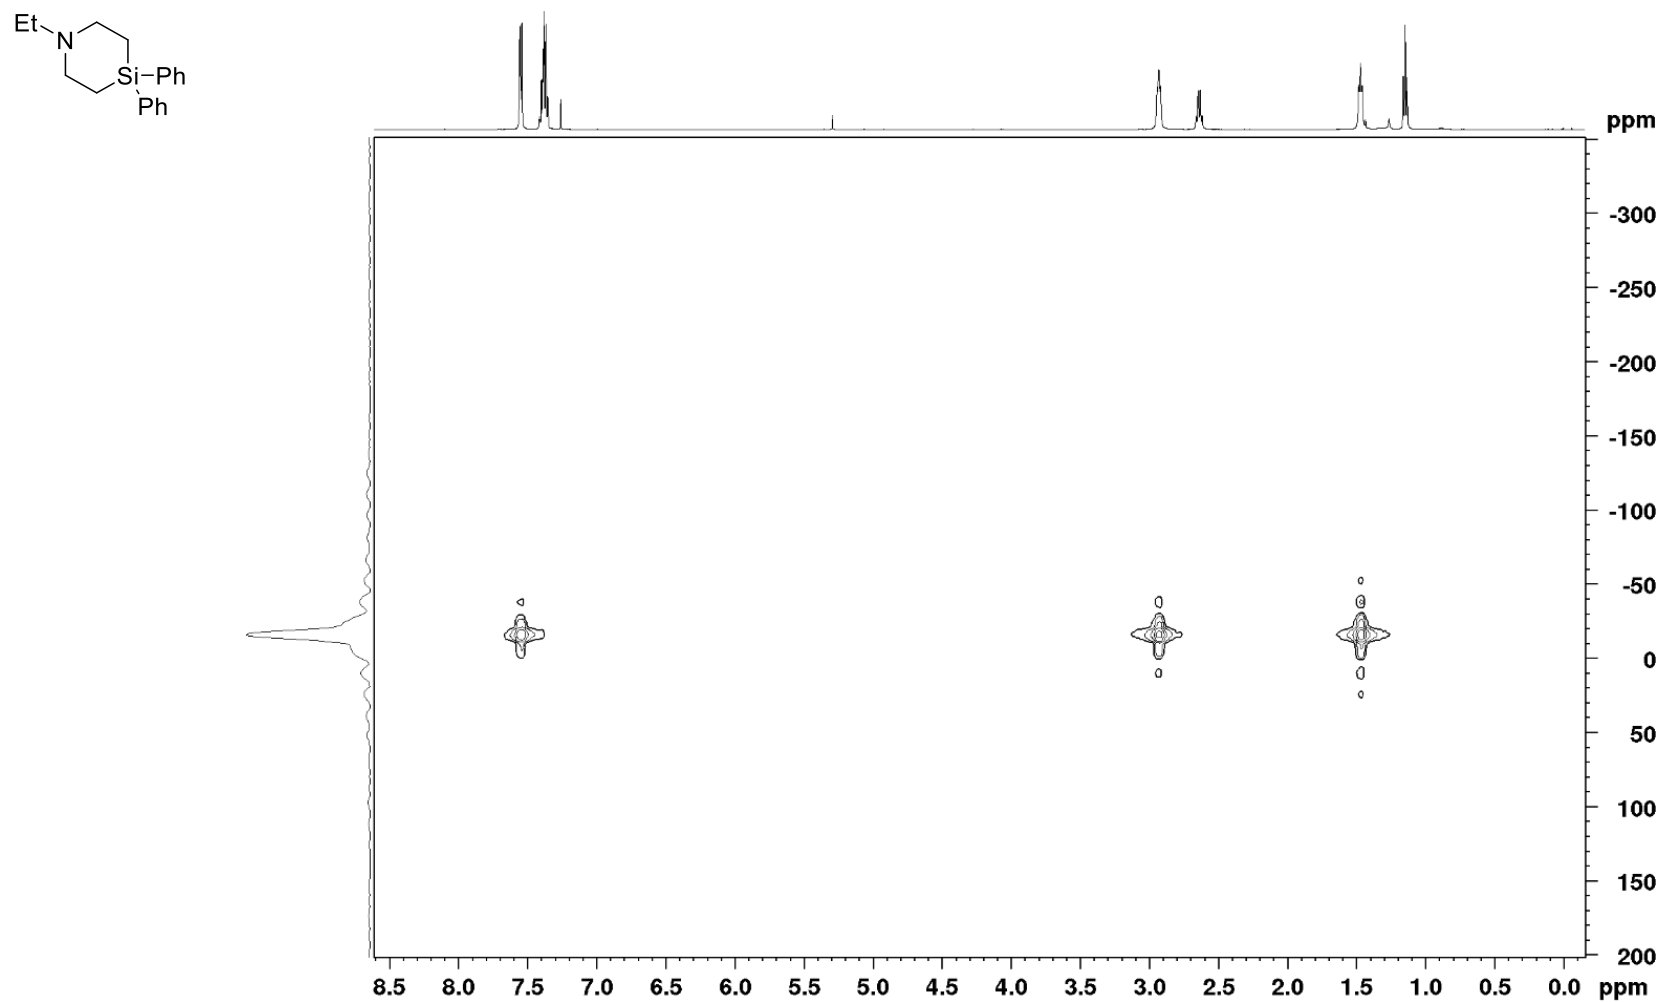

**Figure S55.**  $^1\text{H}$  NMR spectrum (500 MHz,  $\text{CDCl}_3$ , 298 K) of **1-methyl-4,4-diphenyl-1,4-azasilinane (3qa)**.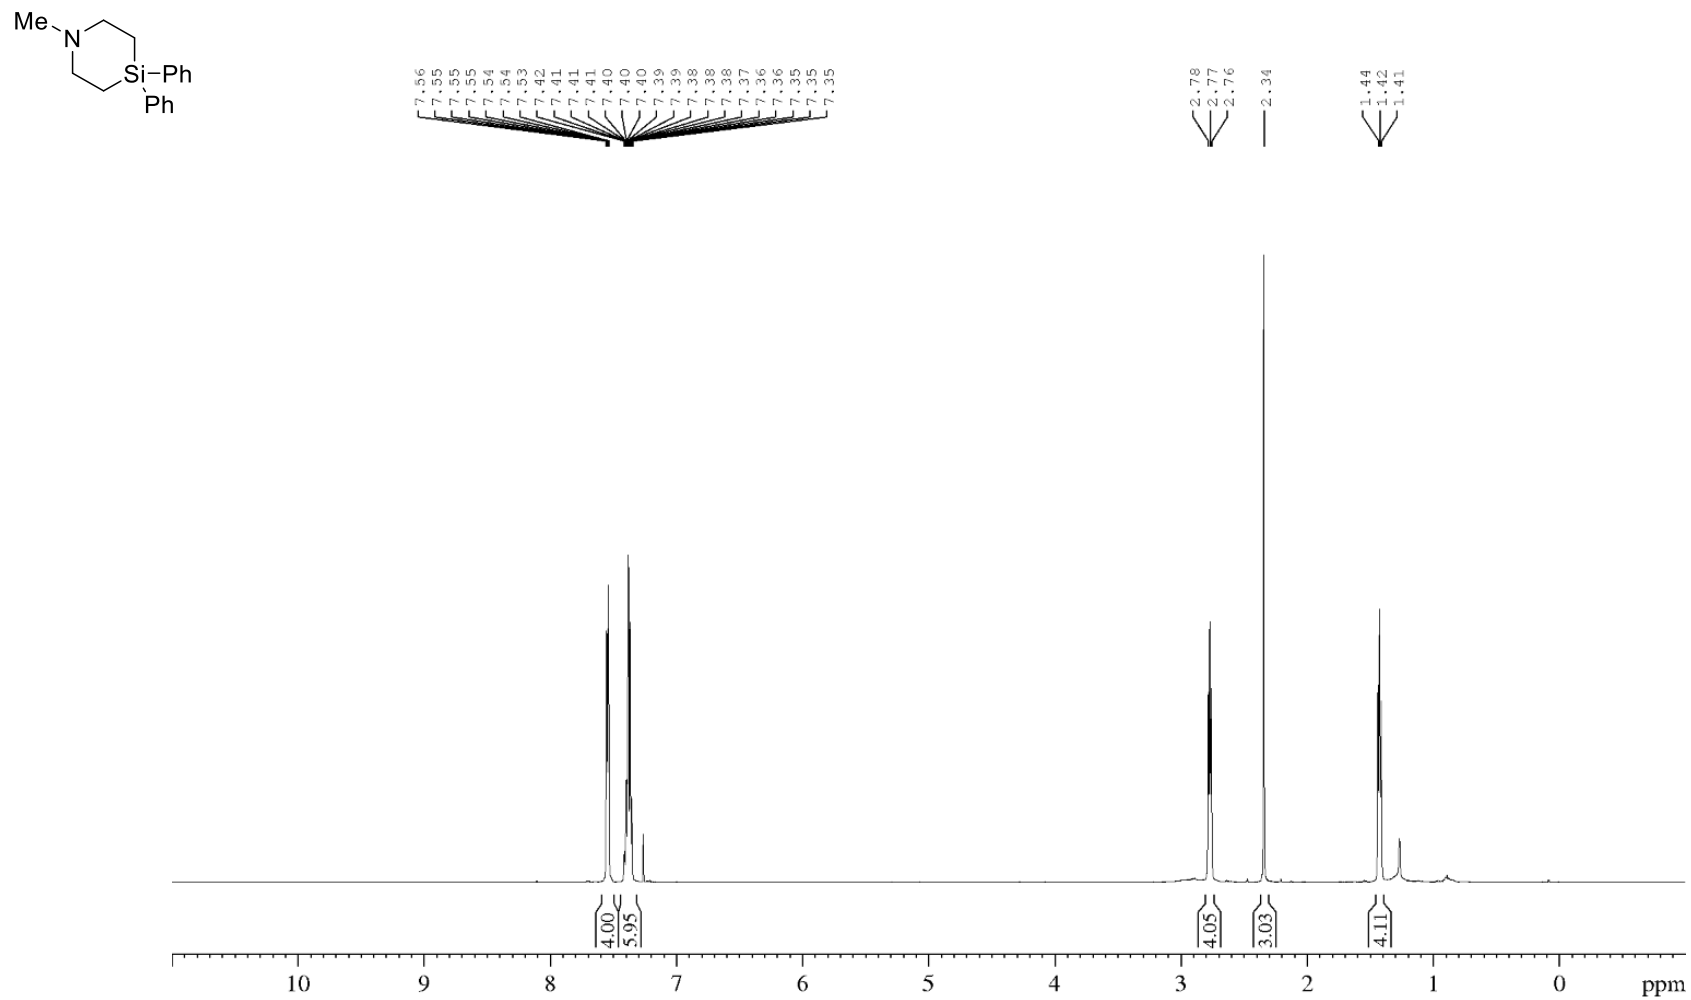

**Figure S56.**  $^{13}\text{C}$  NMR spectrum (125 MHz,  $\text{CDCl}_3$ , 298 K) of **1-methyl-4,4-diphenyl-1,4-azasilinane (3qa)**.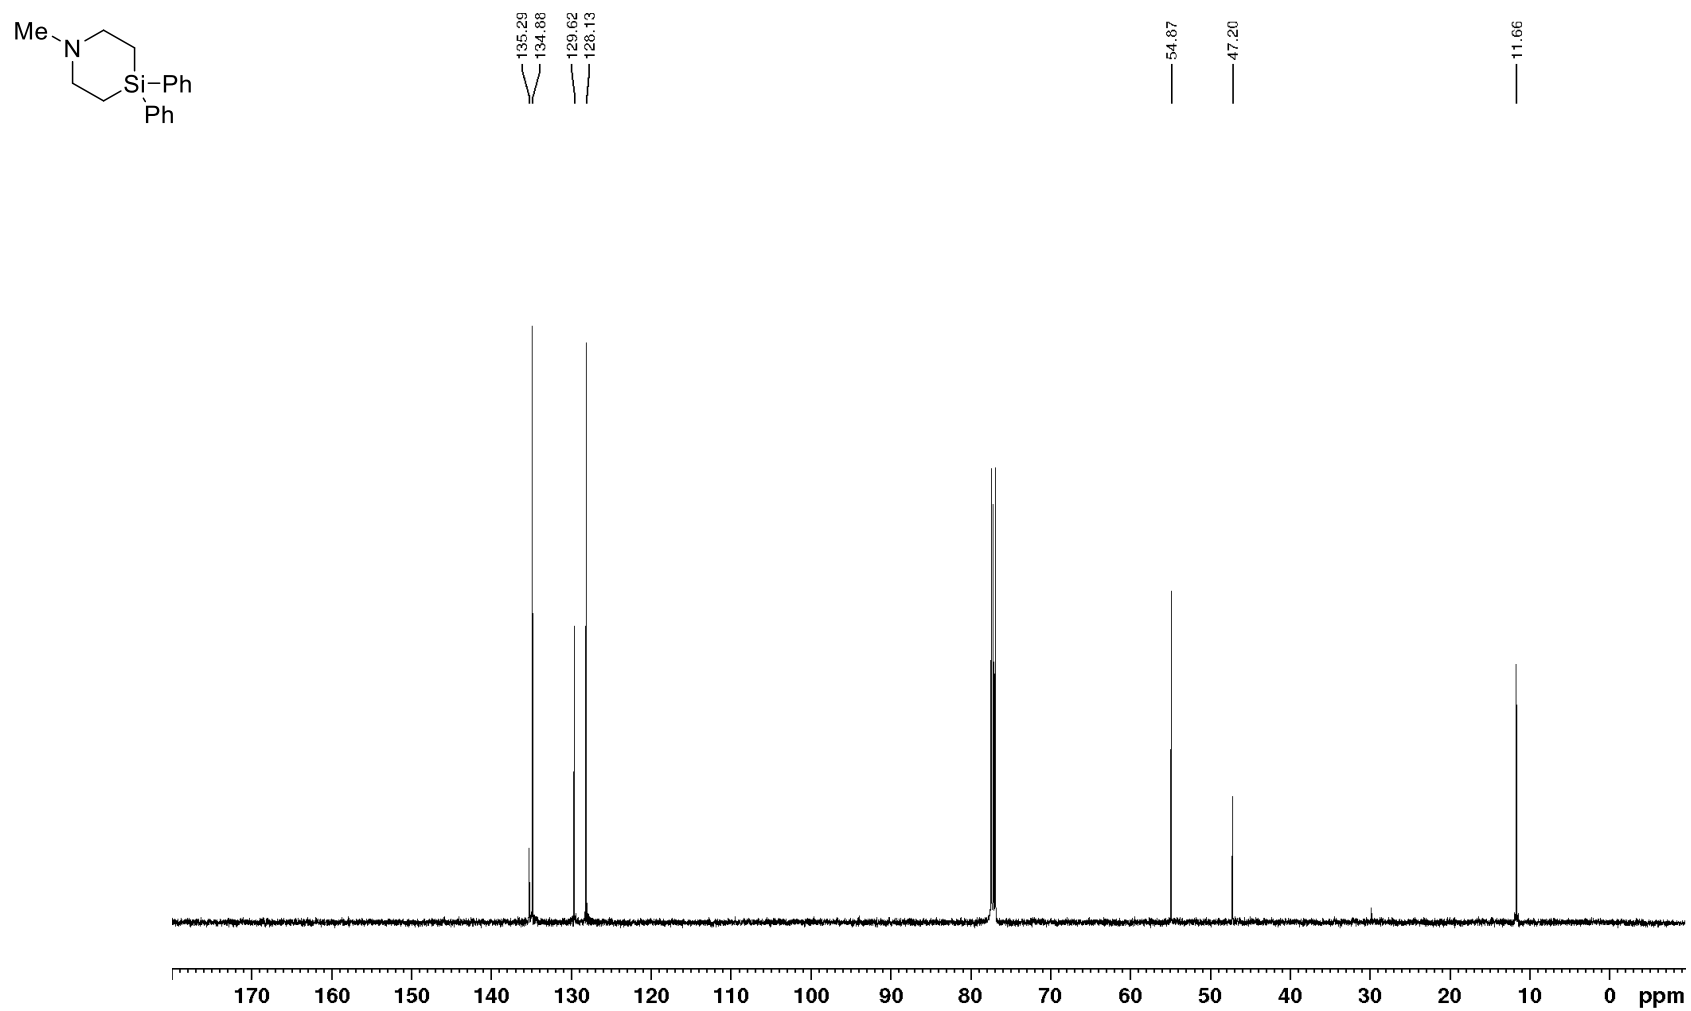

**Figure S57.**  $^1\text{H}/^{29}\text{Si}$  HMQC NMR (500/99 MHz,  $\text{CDCl}_3$ , 298 K, optimized for  $J = 7$  Hz) of **1-methyl-4,4-diphenyl-1,4-azasilinane (3qa)**.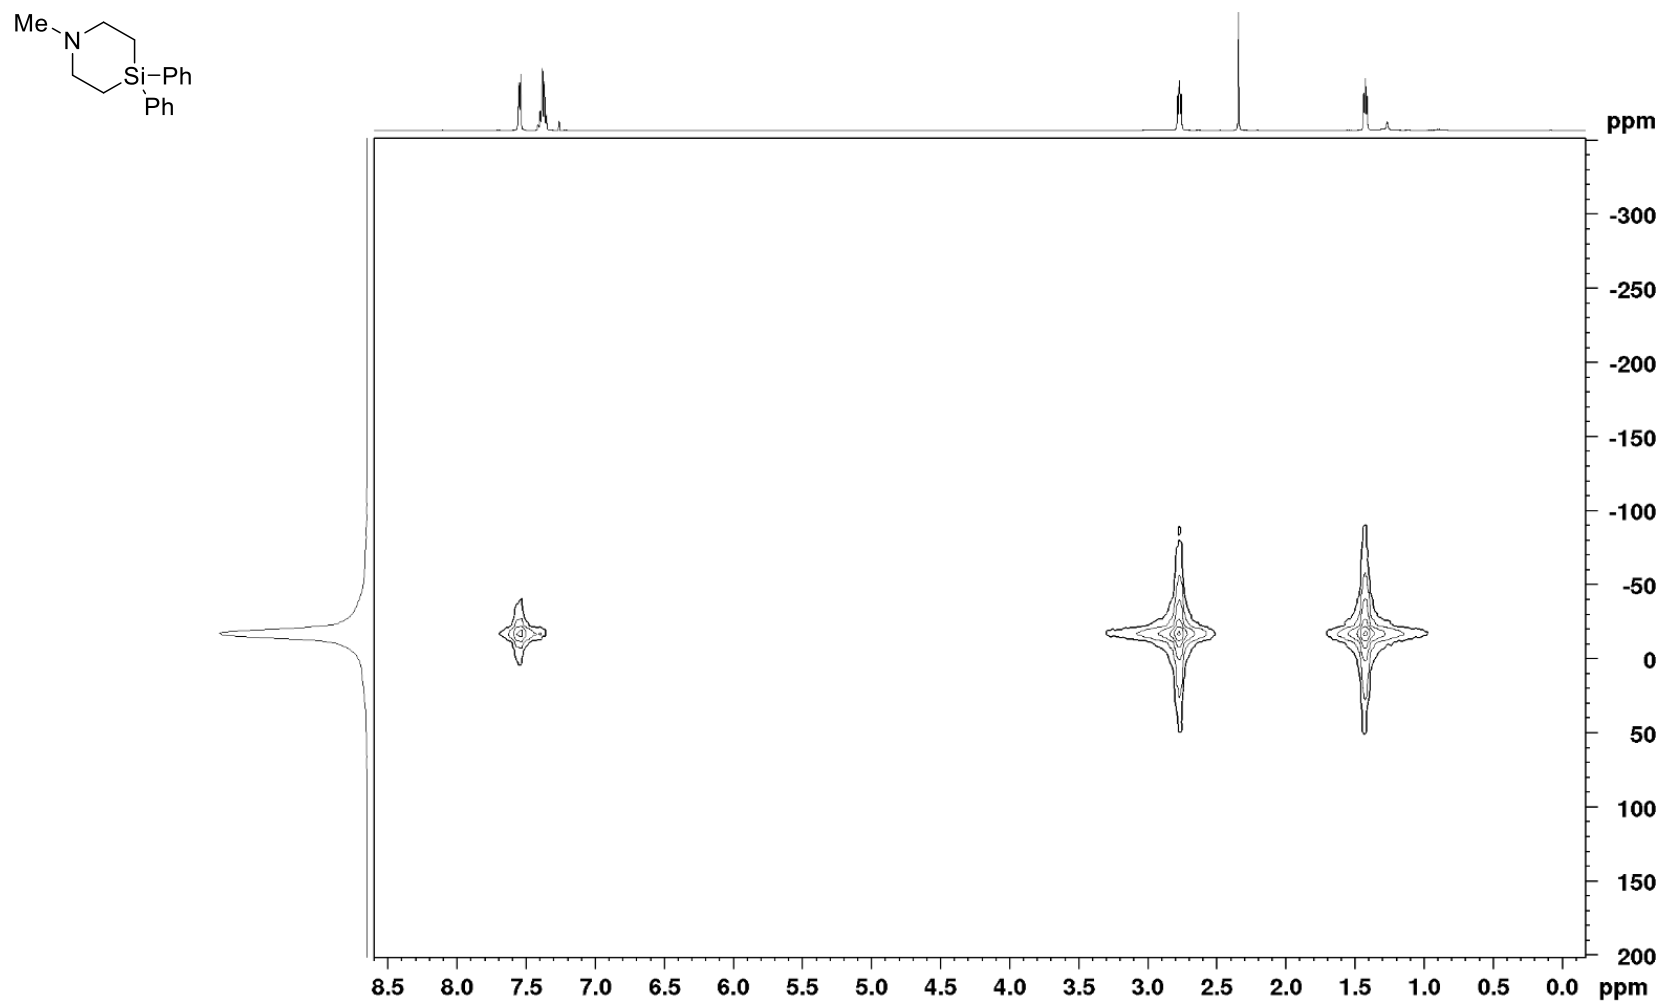

**Figure S58.**  $^1\text{H}$  NMR spectrum (500 MHz,  $\text{CDCl}_3$ , 298 K) of **1-benzyl-3-methyl-4,4-diphenyl-1,4-azasilinane (3ra)**.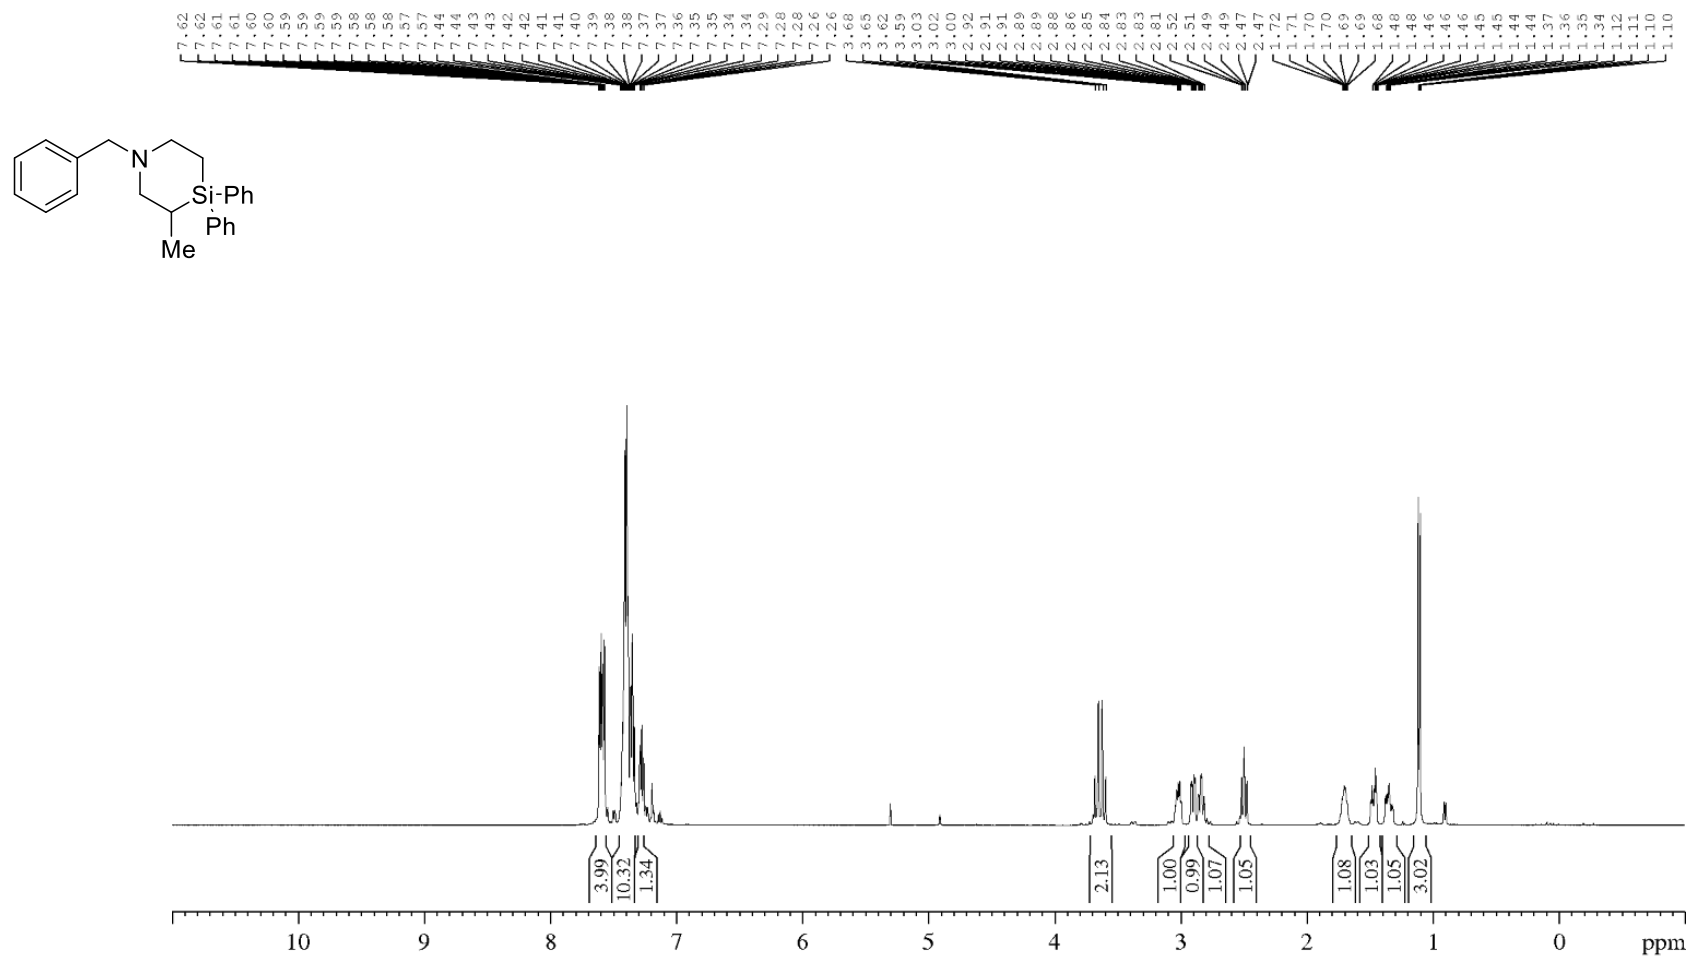



**Figure S59.**  $^{13}\text{C}$  NMR spectrum (125 MHz,  $\text{CDCl}_3$ , 298 K) of **1-benzyl-3-methyl-4,4-diphenyl-1,4-azasilinane (3ra)**.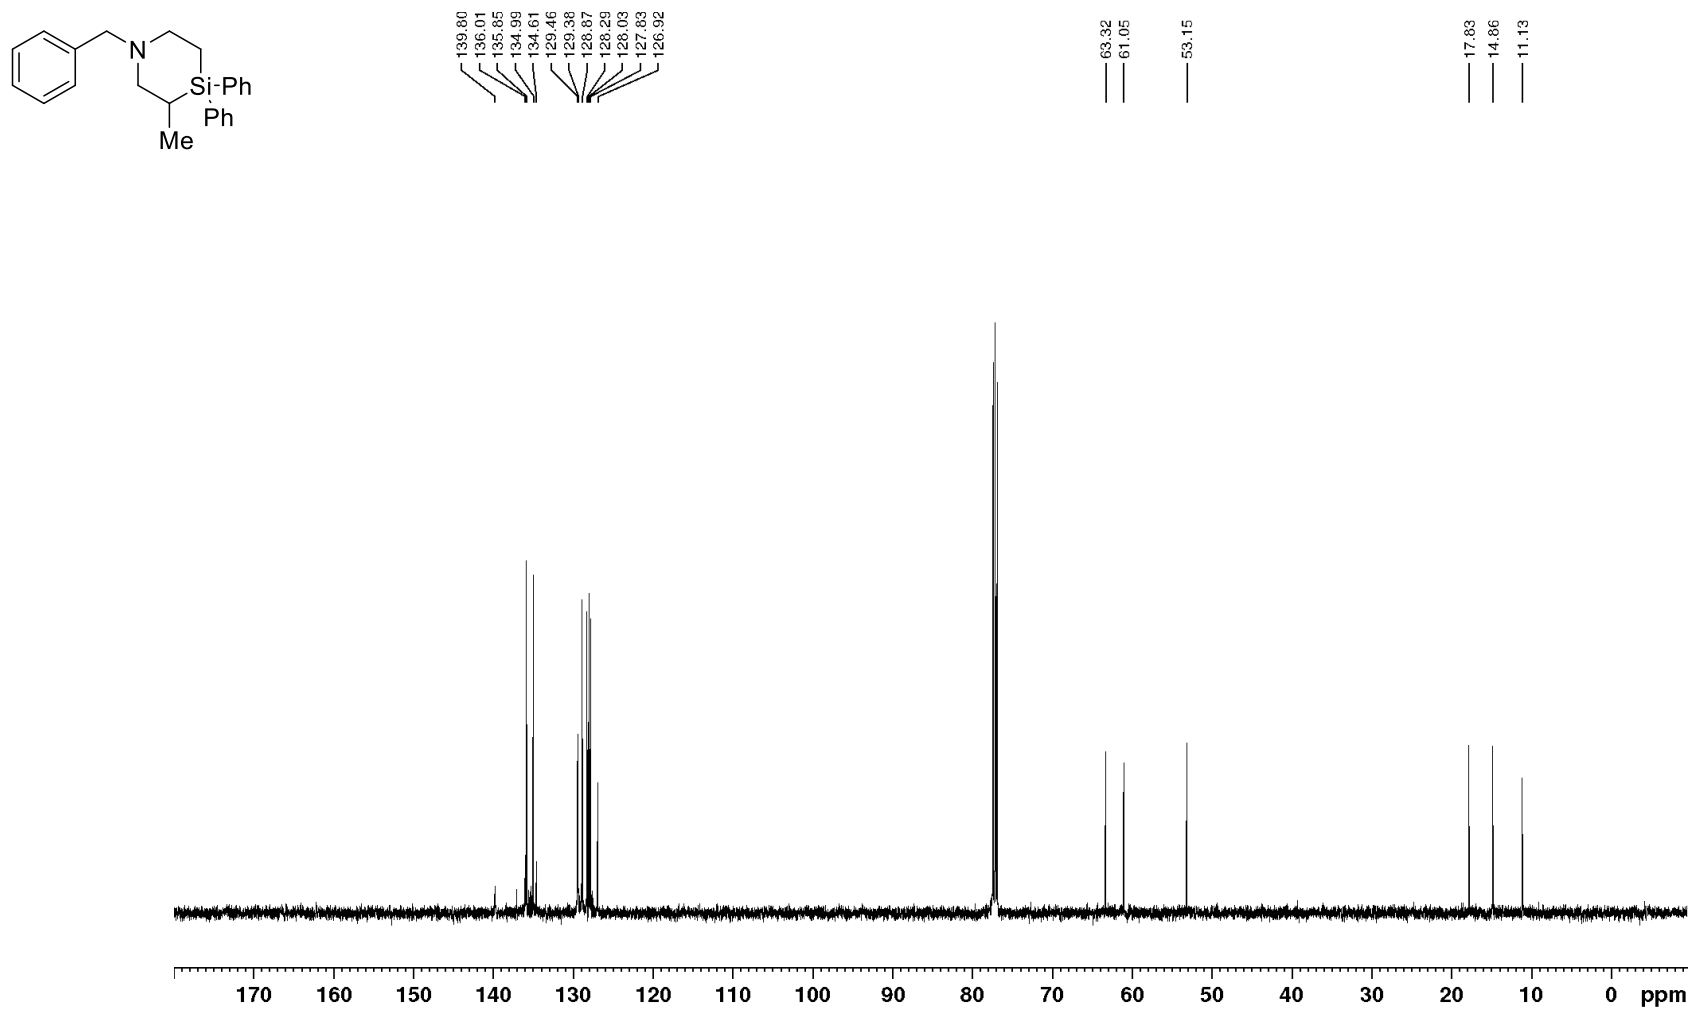

**Figure S60.**  $^1\text{H}/^{29}\text{Si}$  HMQC NMR (500/99 MHz,  $\text{CDCl}_3$ , 298 K, optimized for  $J = 7$  Hz) of **1-benzyl-3-methyl-4,4-diphenyl-1,4-azasilinane****(3ra).**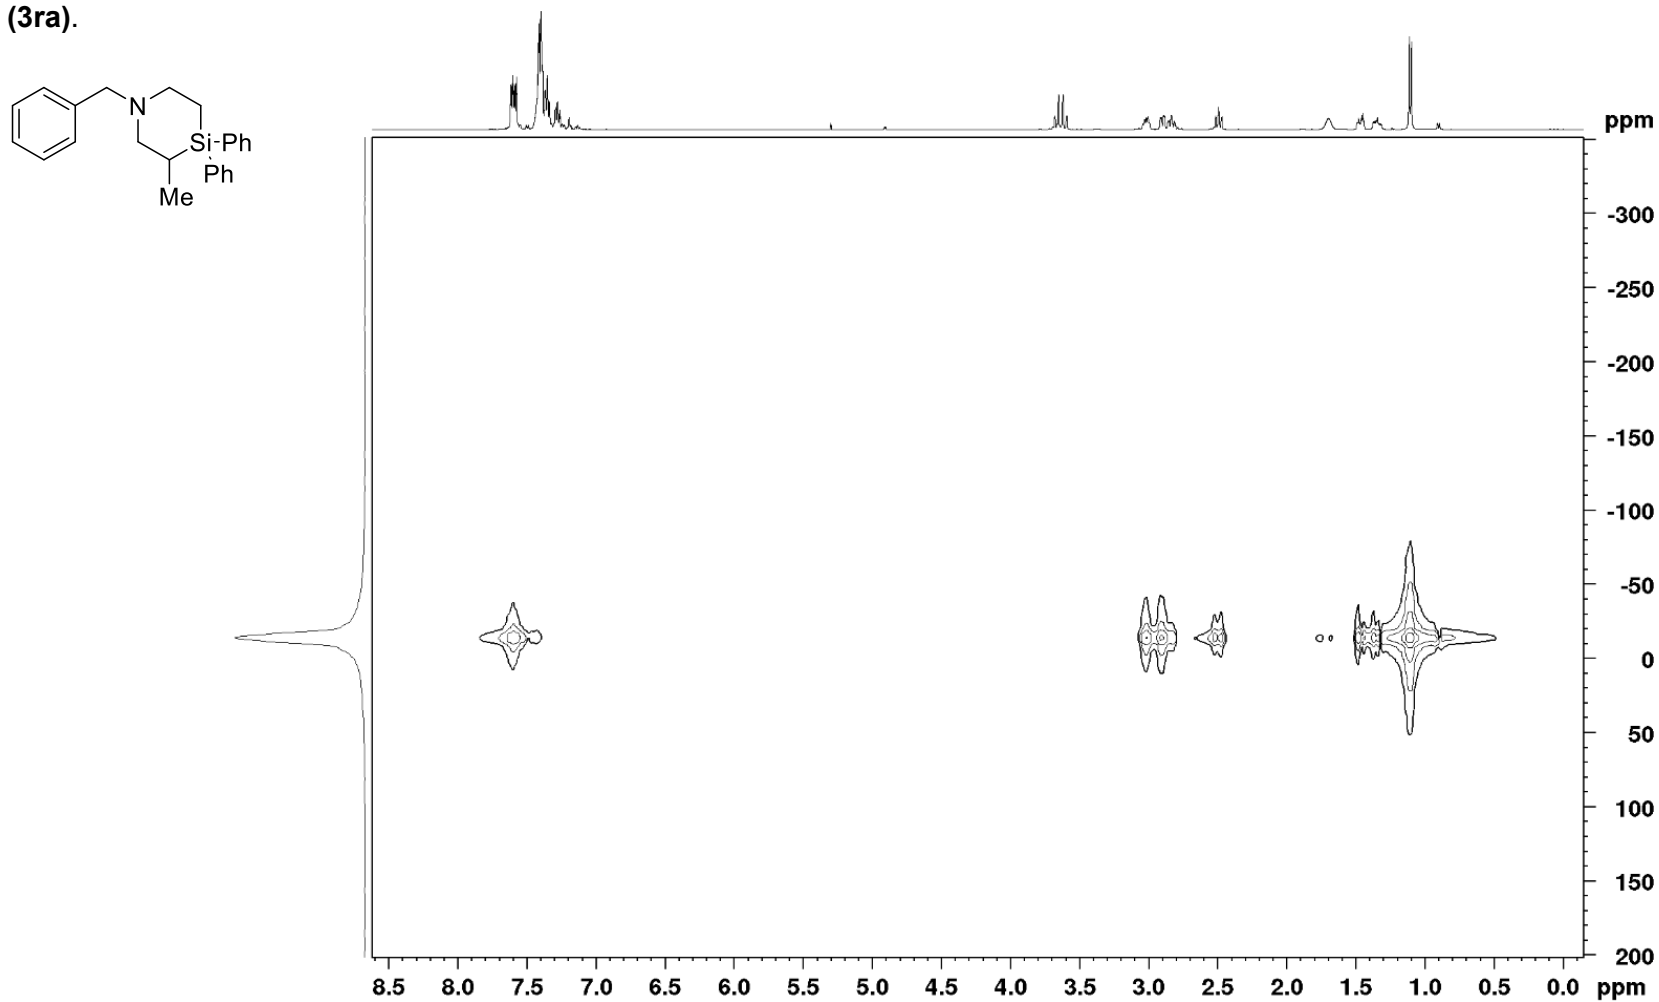

**Figure S61.**  $^1\text{H}$  NMR spectrum (500 MHz,  $\text{CDCl}_3$ , 298 K) of **1-benzyl-3-ethyl-4,4-diphenyl-1,4-azasilinane (3sa)**.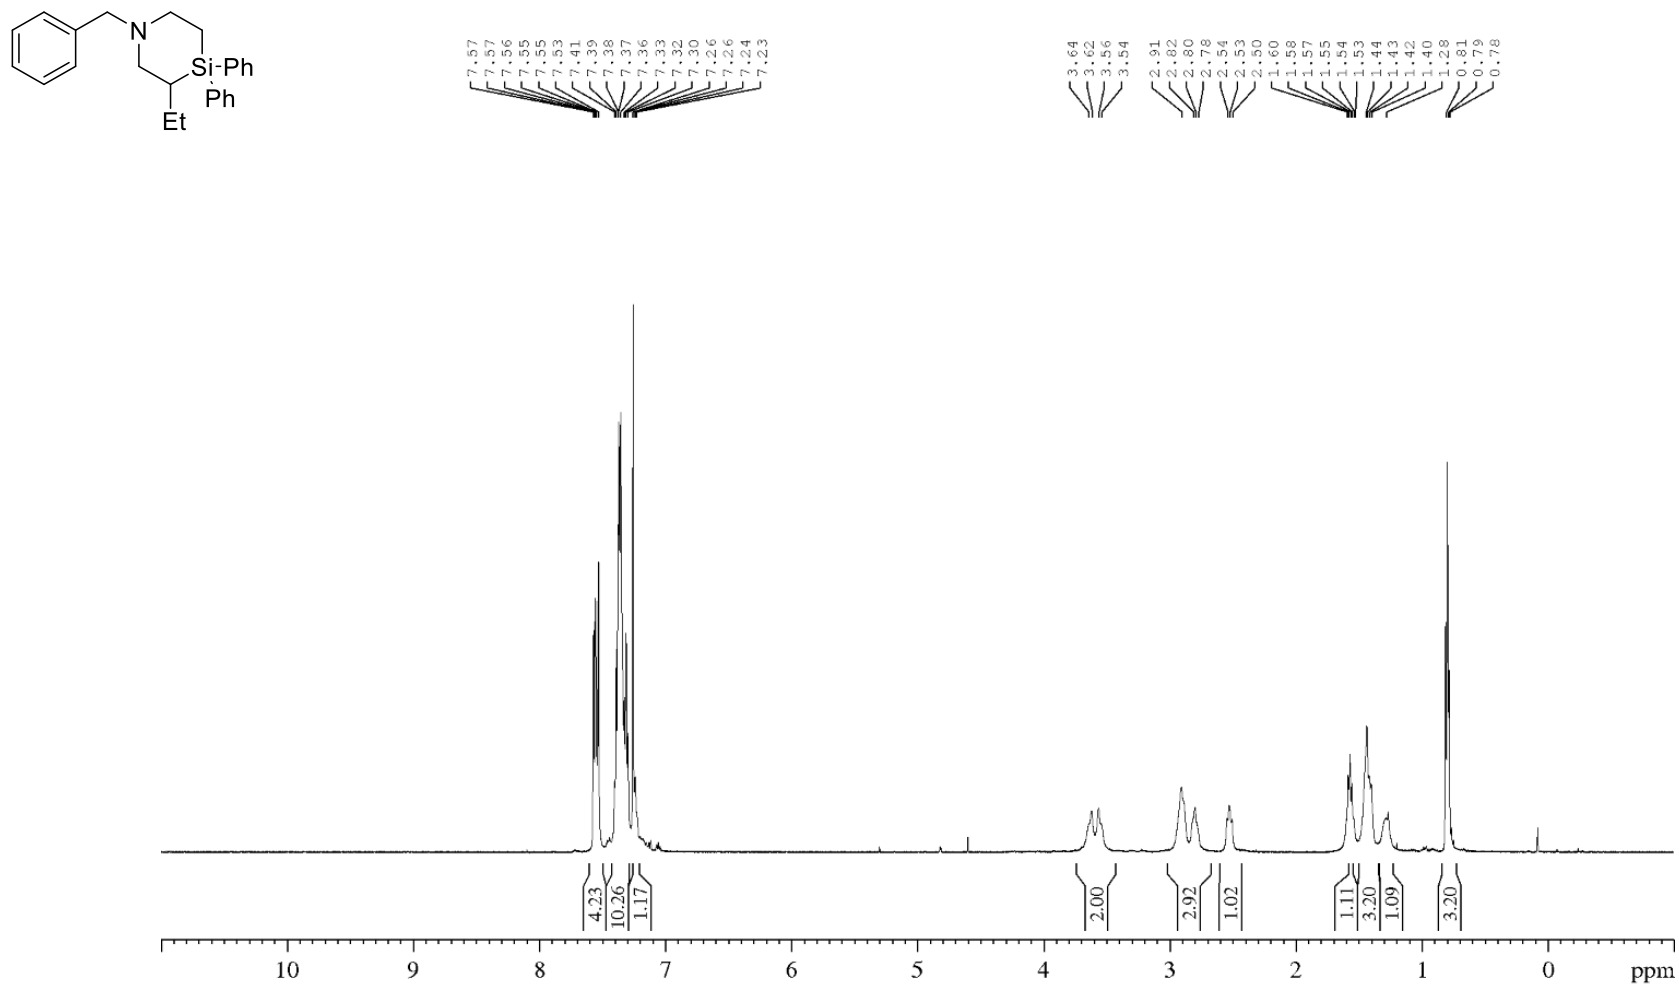

**Figure S62.**  $^{13}\text{C}$  NMR spectrum (125 MHz,  $\text{CDCl}_3$ , 298 K) of **1-benzyl-3-ethyl-4,4-diphenyl-1,4-azasilinane (3sa)**.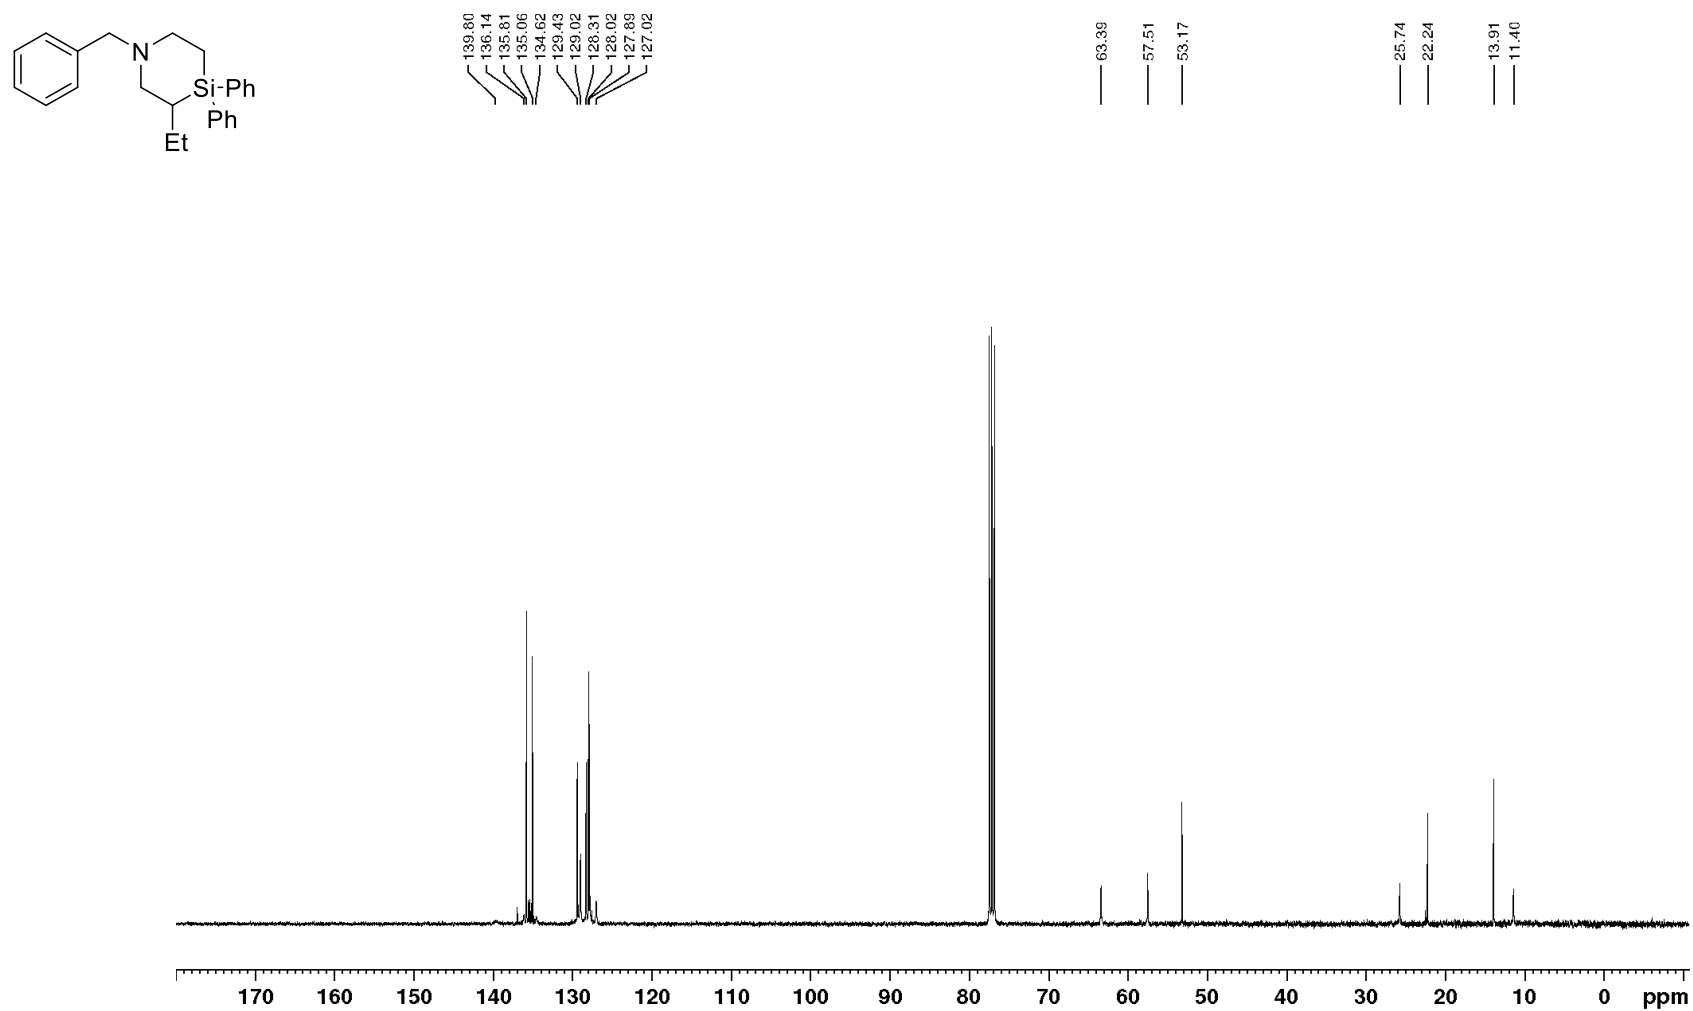

**Figure S63.**  $^1\text{H}/^{29}\text{Si}$  HMQC NMR (500/99 MHz,  $\text{CDCl}_3$ , 298 K, optimized for  $J = 7$  Hz) of **1-benzyl-3-ethyl-4,4-diphenyl-1,4-azasilinane (3sa)**.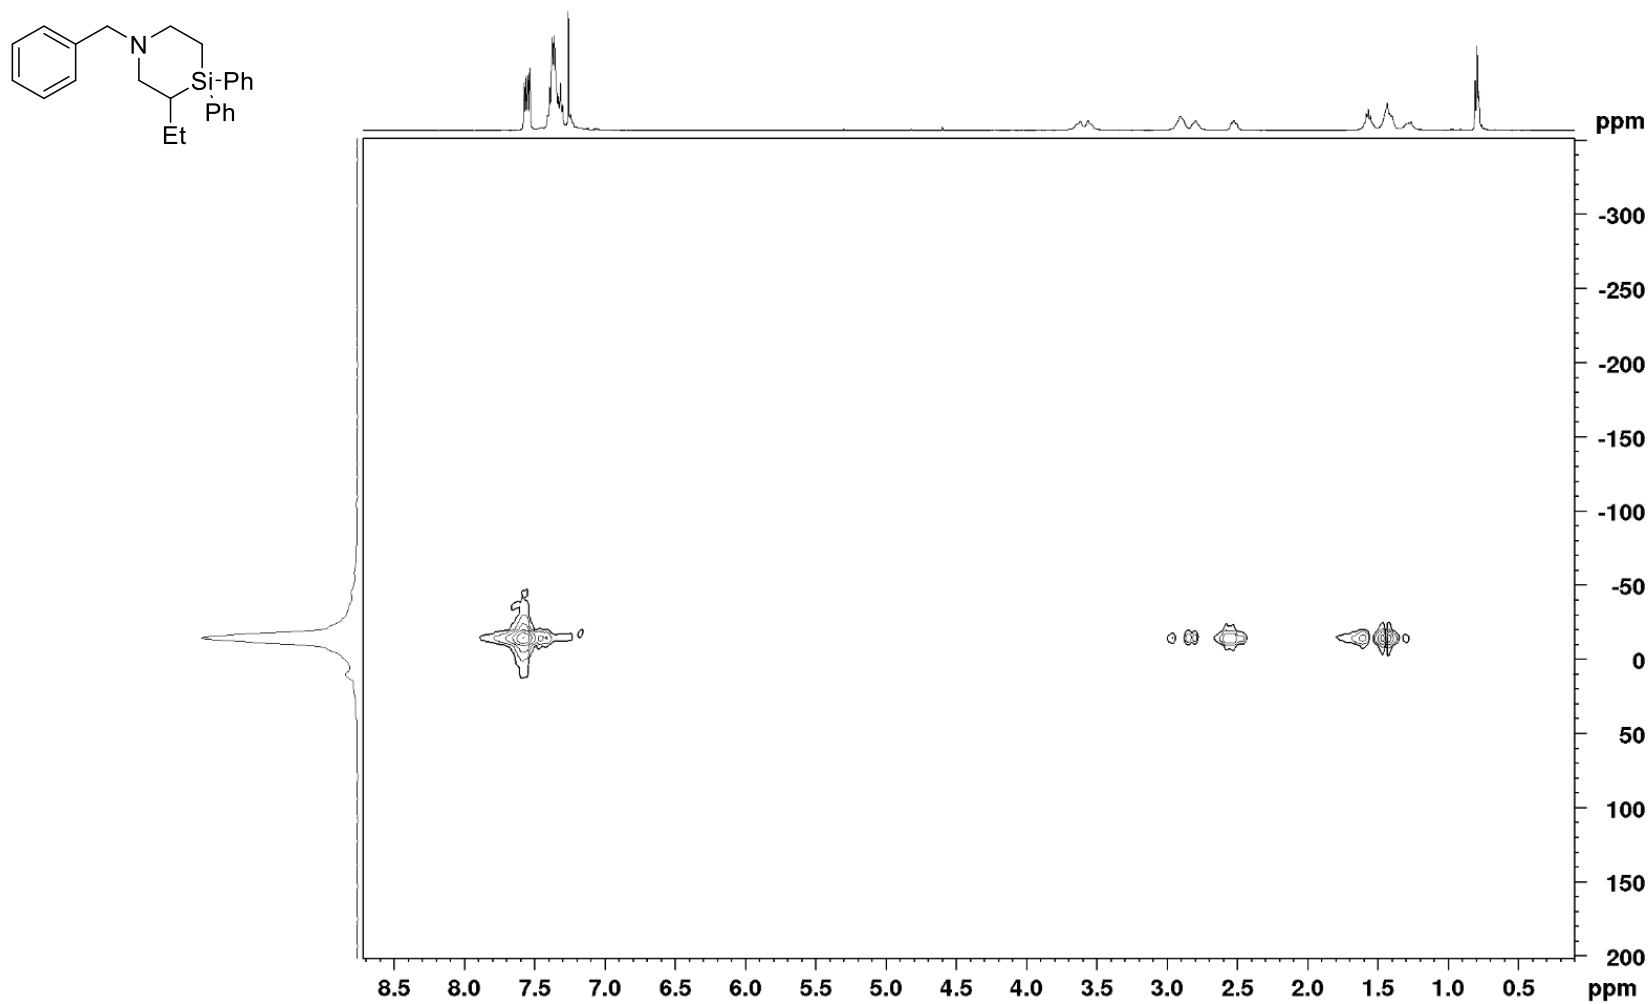

**Figure S64.**  $^1\text{H}$  NMR spectrum (500 MHz,  $\text{CDCl}_3$ , 298 K) of **3,5-dimethyl-4,4-diphenyl-1-propyl-1,4-azasilinane (3ta)** (d.r. = 58:42).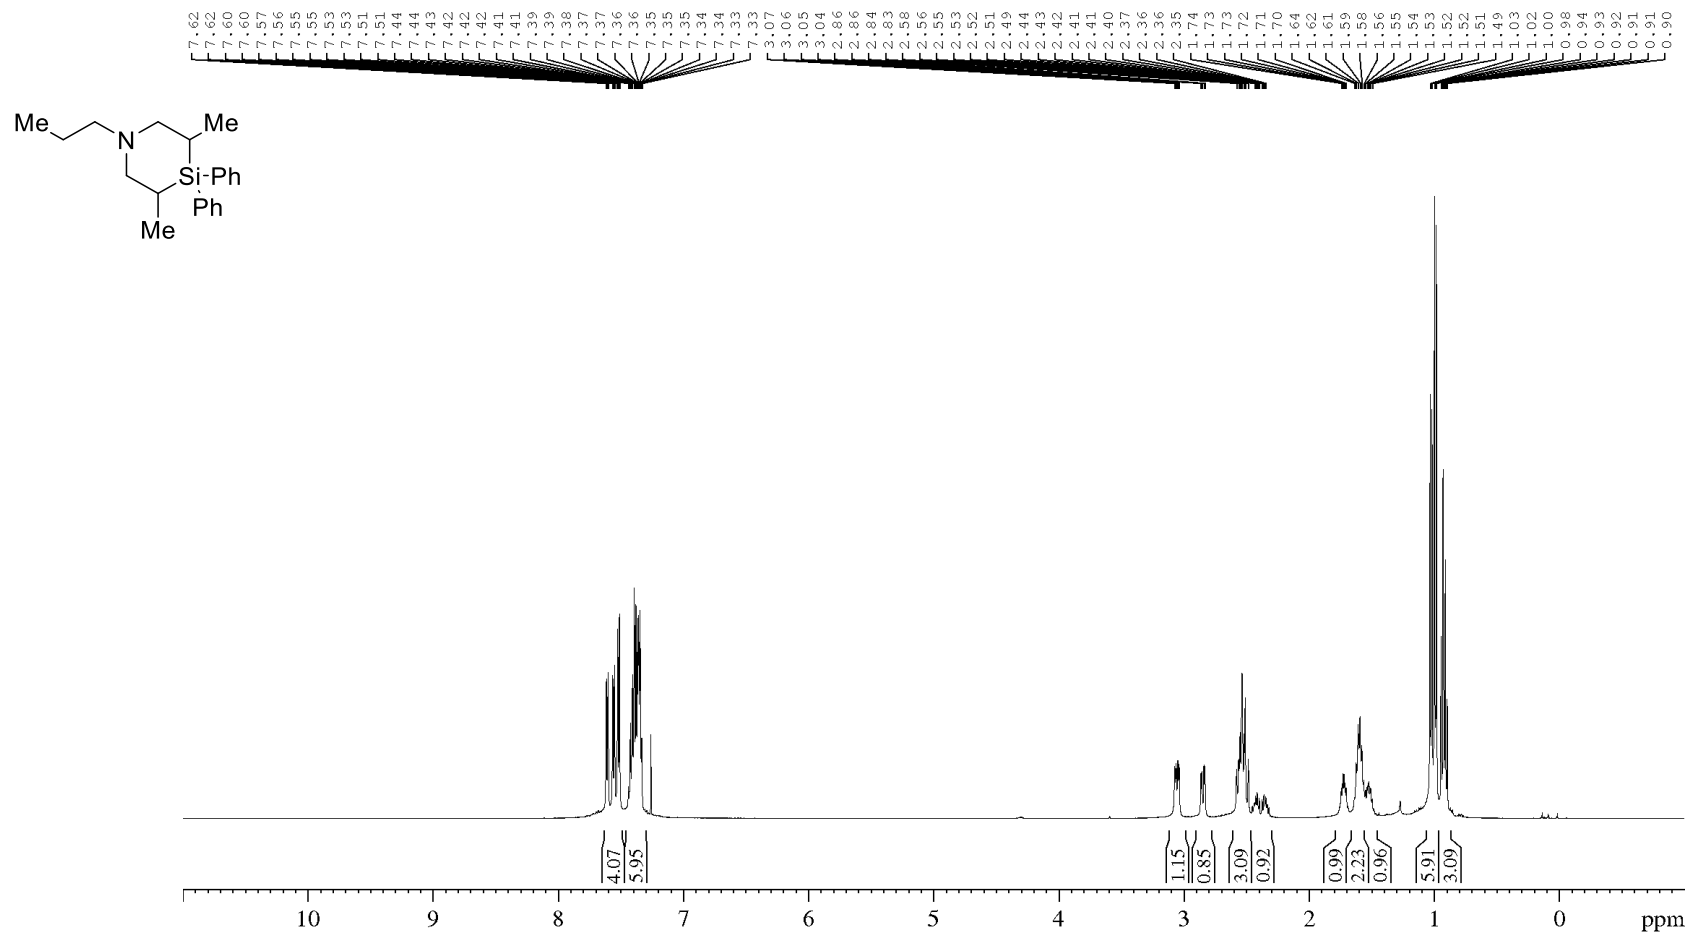

**Figure S65.**  $^{13}\text{C}$  NMR spectrum (125 MHz,  $\text{CDCl}_3$ , 298 K) of **3,5-dimethyl-4,4-diphenyl-1-propyl-1,4-azasilinane (3ta)** (d.r. = 58:42).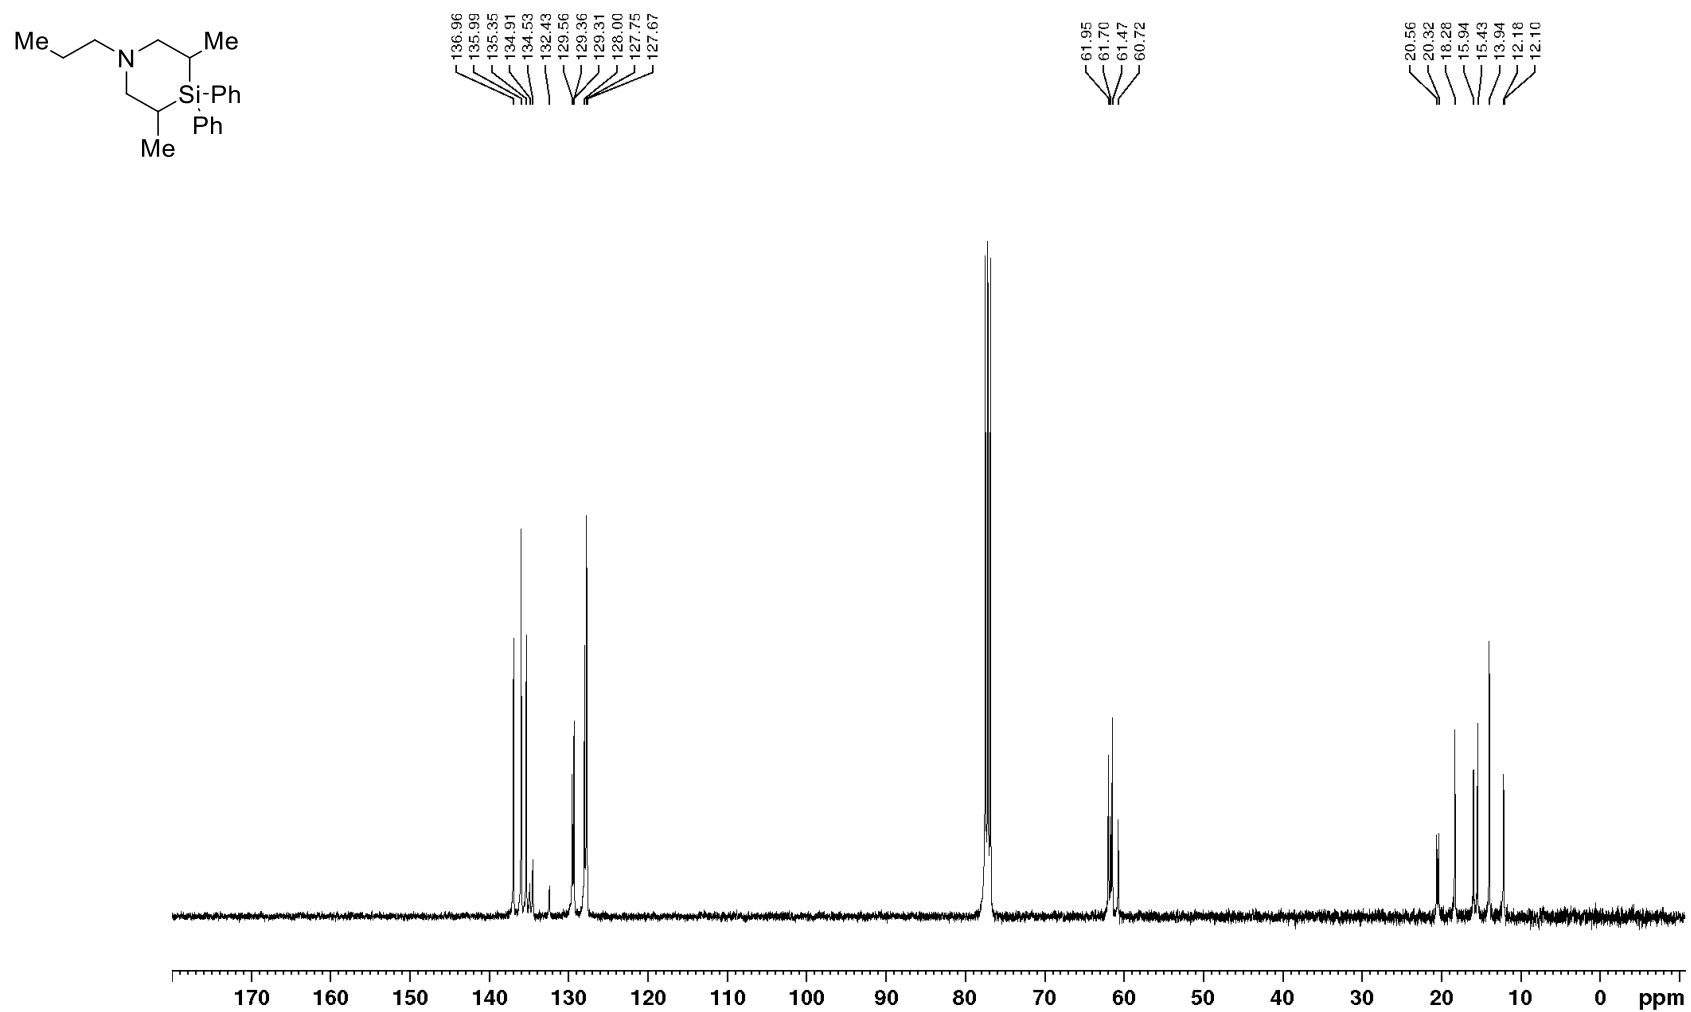

**Figure S66.**  $^1\text{H}/^{29}\text{Si}$  HMQC NMR (500/99 MHz,  $\text{CDCl}_3$ , 298 K, optimized for  $J = 7$  Hz) of **3,5-dimethyl-4,4-diphenyl-1-propyl-1,4-azasilinane (3ta)** (d.r. = 58:42).

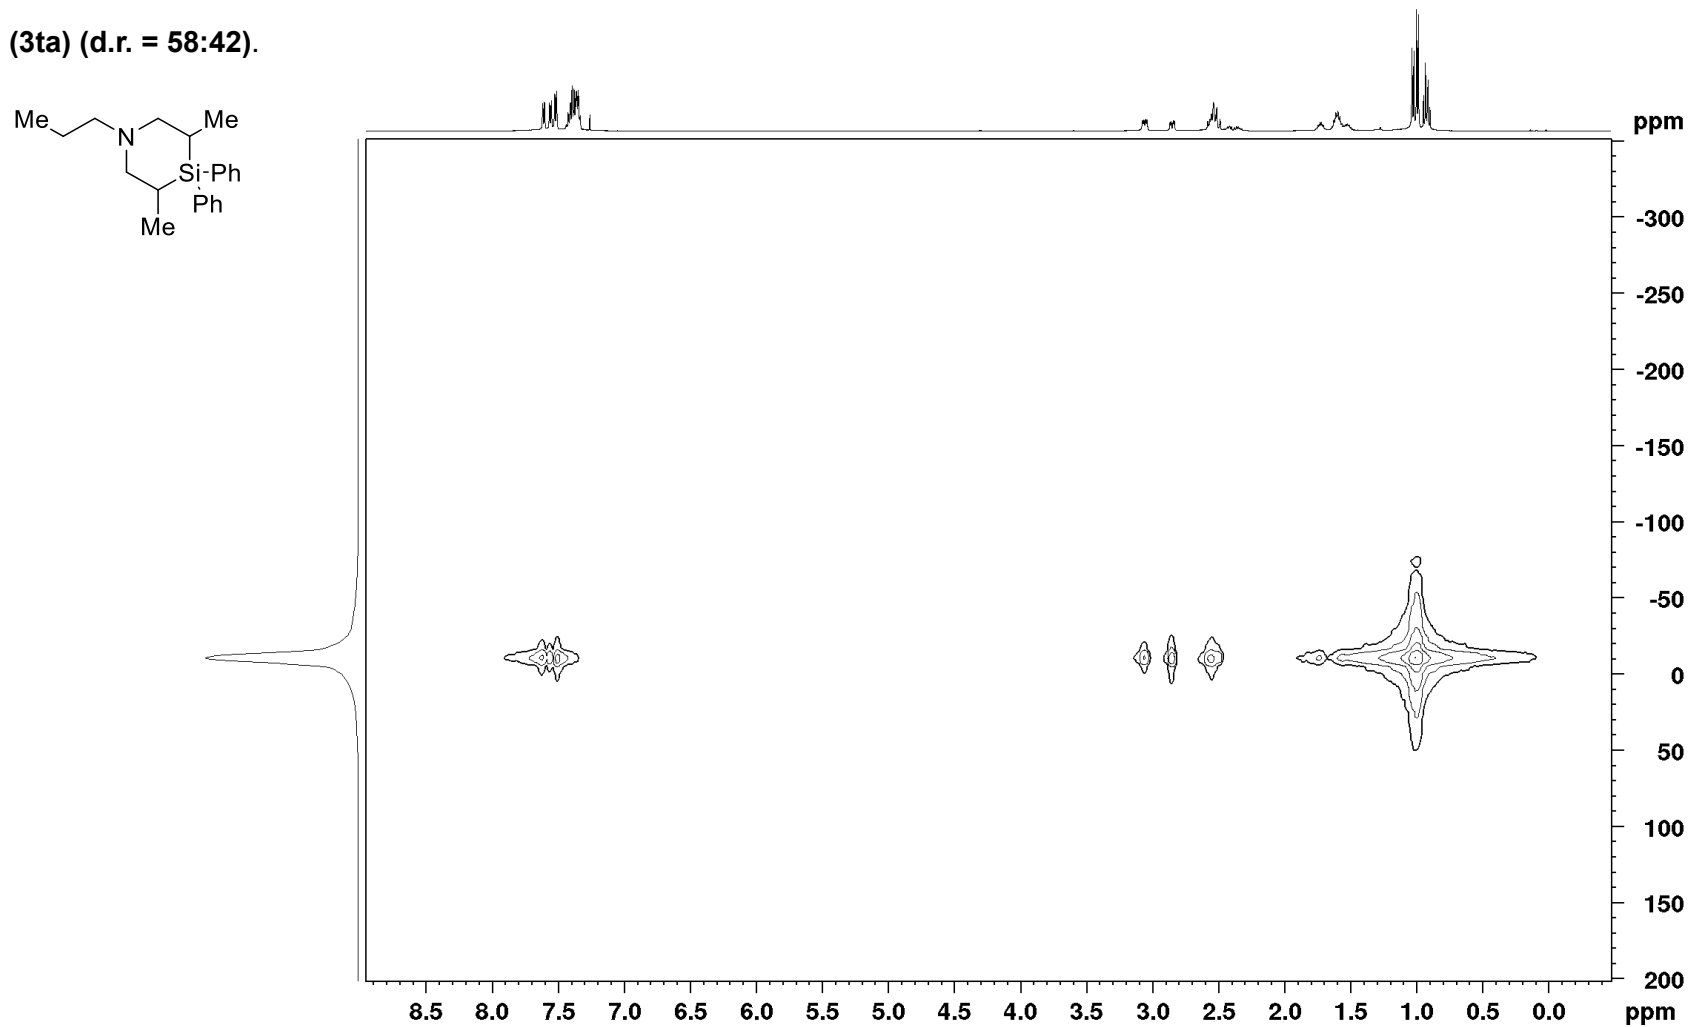



**Figure S67.**  $^1\text{H}$  NMR spectrum (500 MHz,  $\text{CDCl}_3$ , 298 K) of **1-ethyl-6-methyl-4,4-diphenyl-1,2,3,4-tetrahydrobenzo[*b*][1,4]azasiline (4ua)**.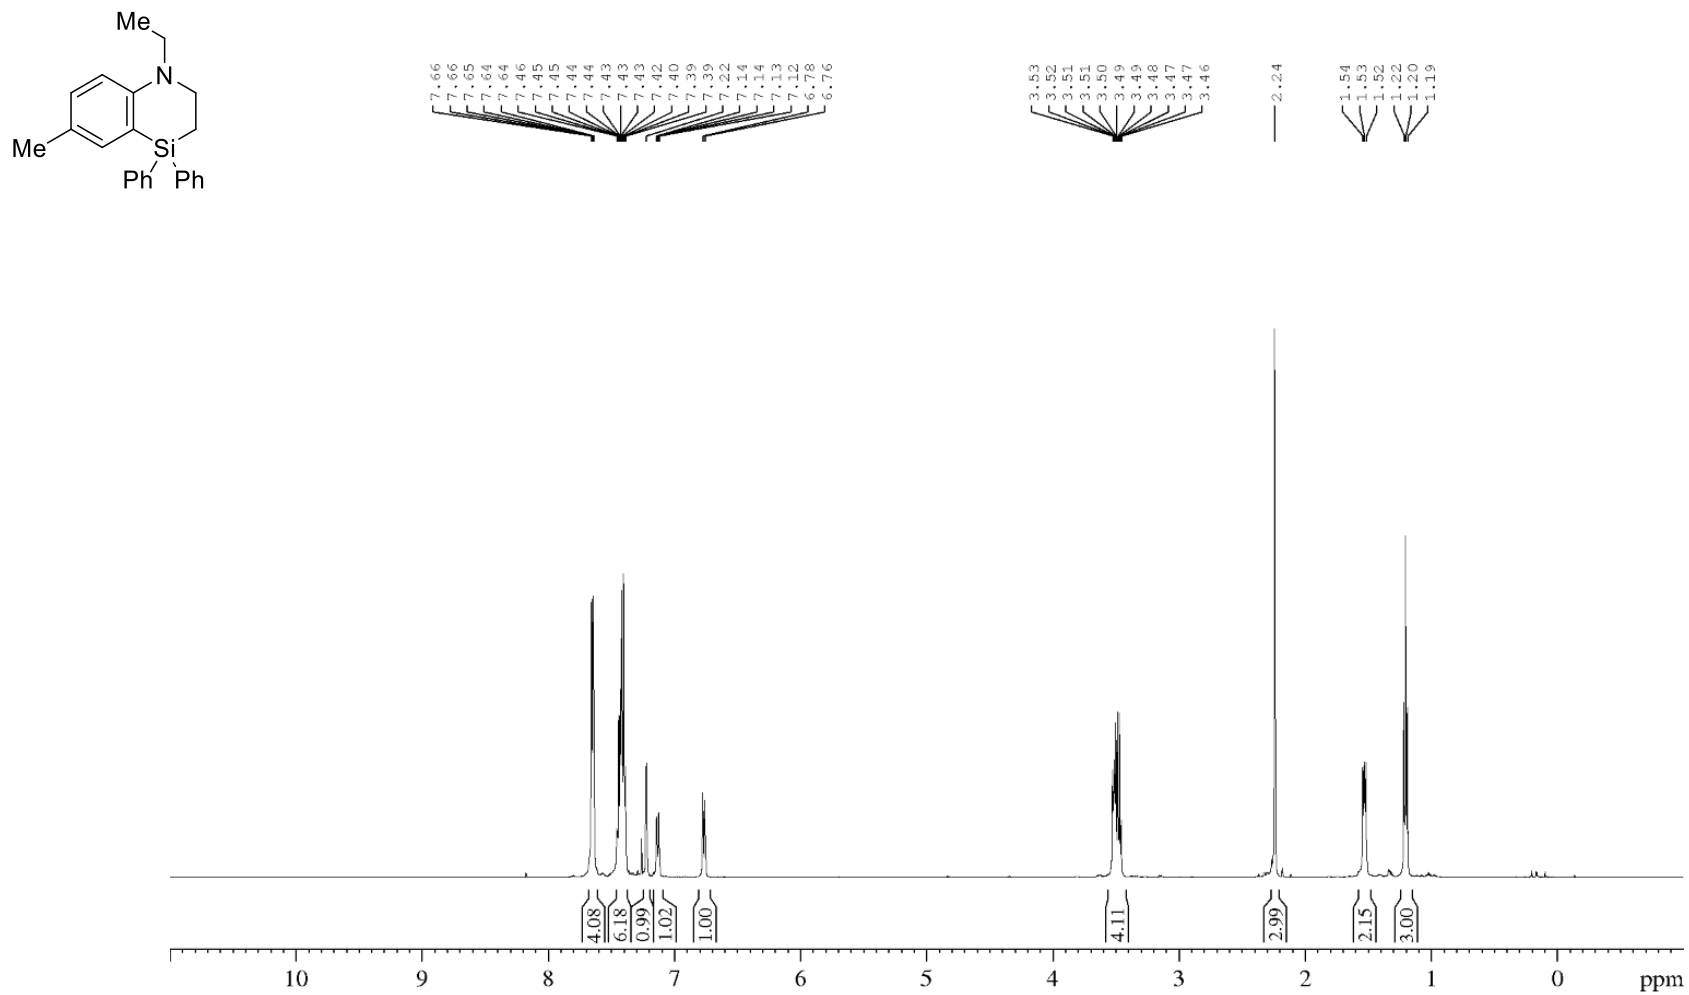

**Figure S68.**  $^{13}\text{C}$  NMR spectrum (125 MHz,  $\text{CDCl}_3$ , 298 K) of 1-ethyl-6-methyl-4,4-diphenyl-1,2,3,4-tetrahydrobenzo[*b*][1,4]azasiline (**4ua**).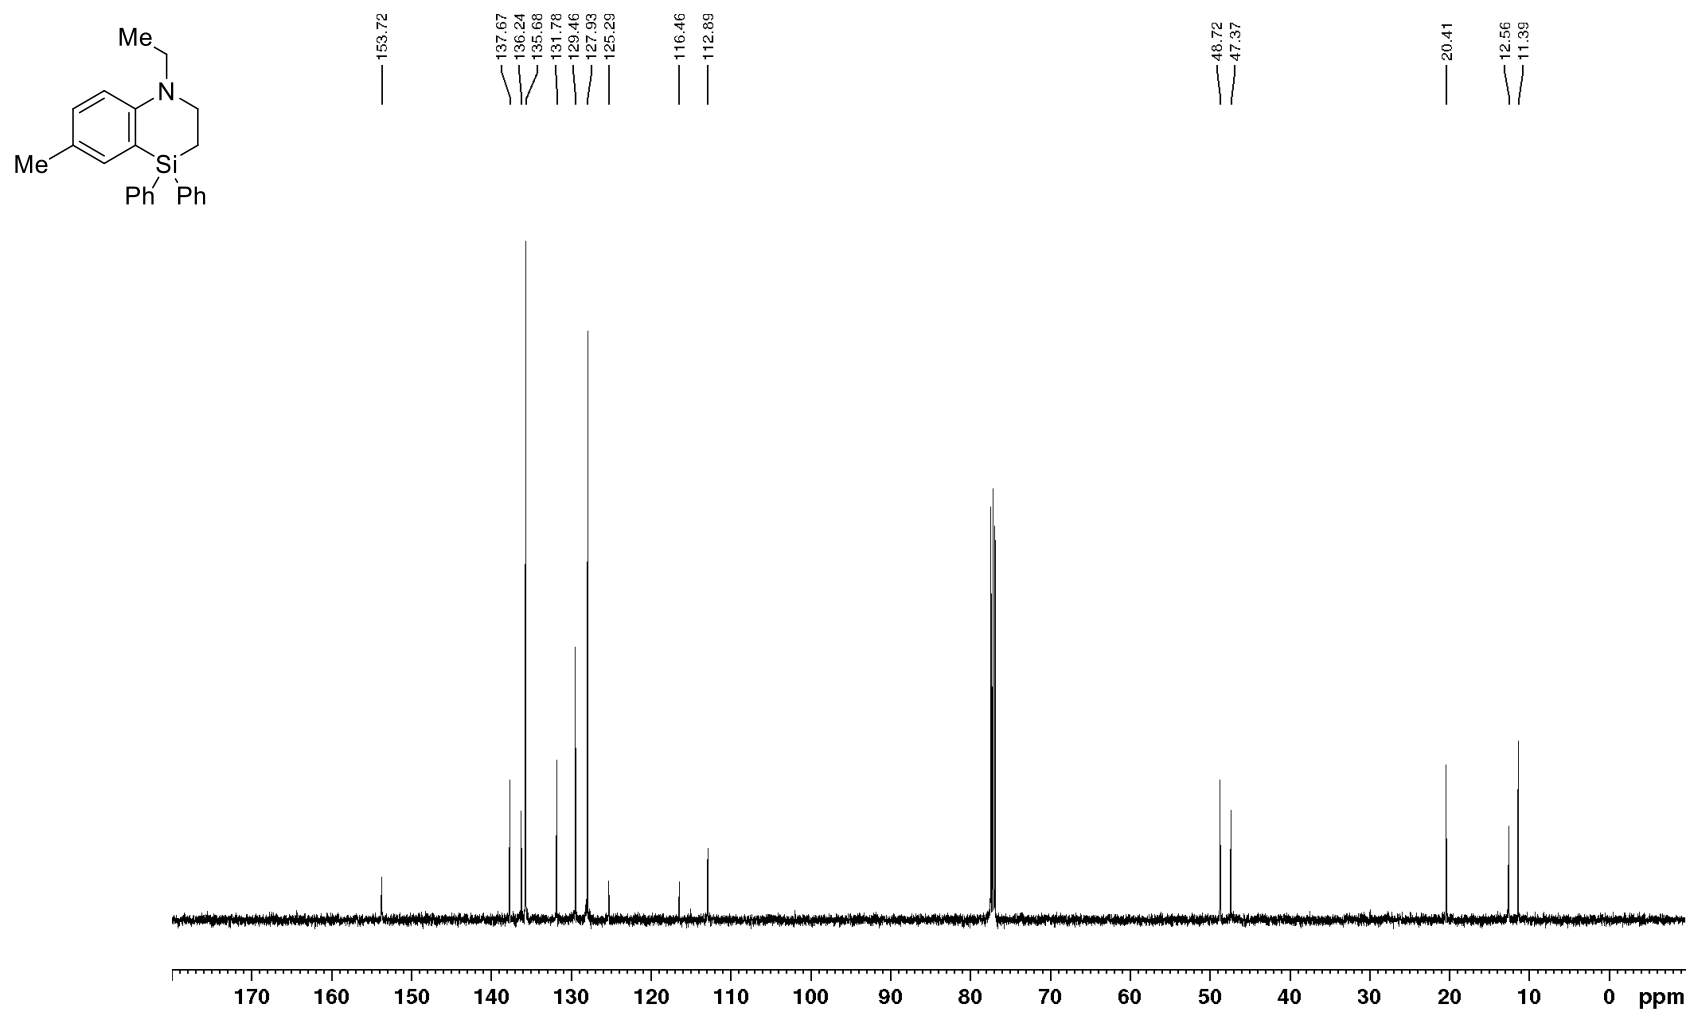

**Figure S69.**  $^1\text{H}/^{29}\text{Si}$  HMQC NMR (500/99 MHz,  $\text{CDCl}_3$ , 298 K, optimized for  $J = 7$  Hz) of 1-ethyl-6-methyl-4,4-diphenyl-1,2,3,4-tetrahydrobenzo[*b*][1,4]azasiline (4ua).

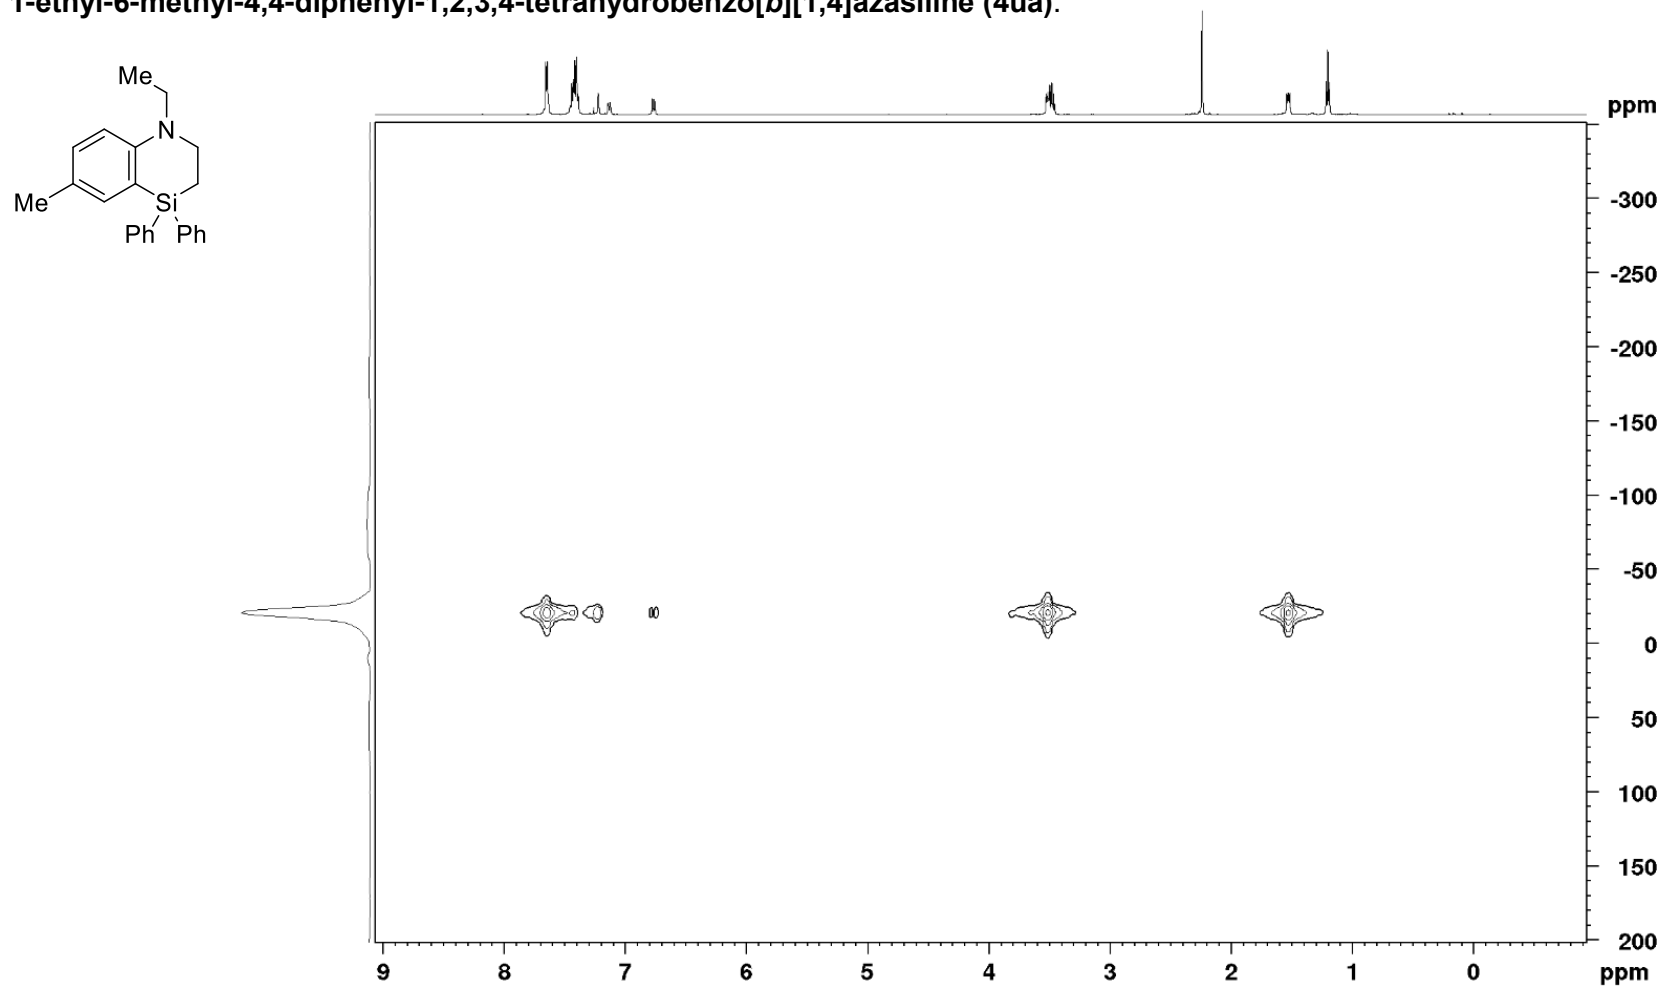

**Figure S70.**  $^1\text{H}$  NMR spectrum (500 MHz,  $\text{CDCl}_3$ , 298 K) of

**8-methyl-1,1,6,6-tetraphenyl-2,3,5,6-tetrahydro-1*H*,4*H*-3*a*-aza-1,6-disilaphenalene (5ua).**

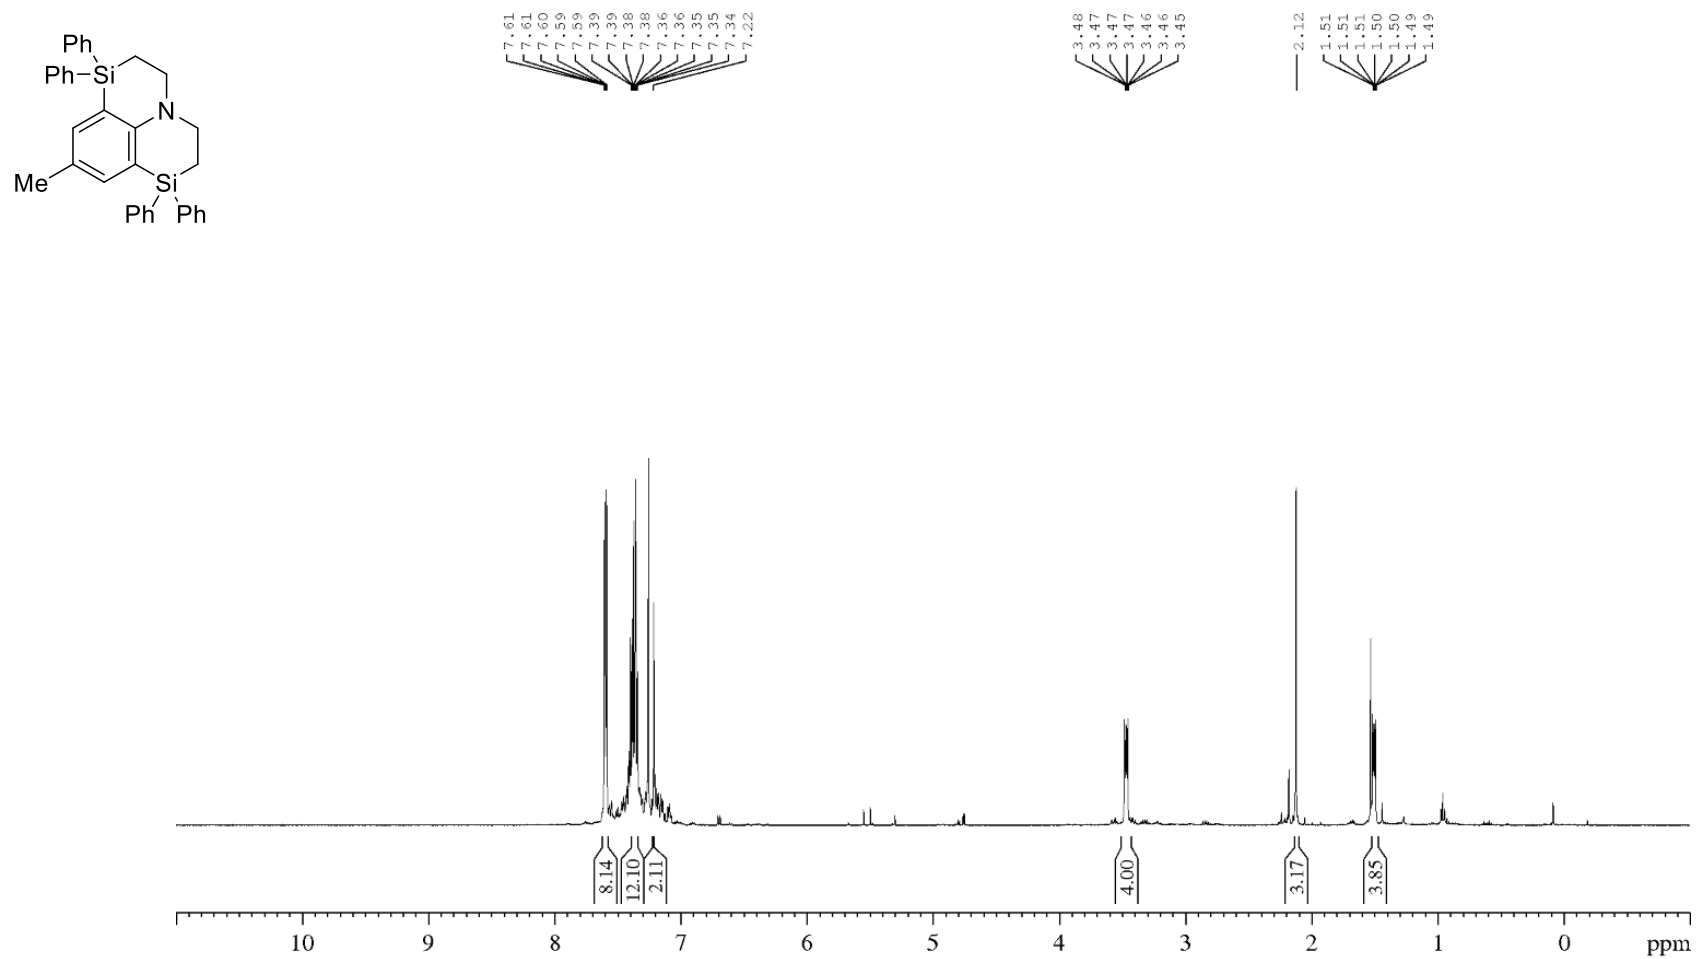

**Figure S71.**  $^{13}\text{C}$  NMR spectrum (125 MHz,  $\text{CDCl}_3$ , 298 K) of

**8-methyl-1,1,6,6-tetraphenyl-2,3,5,6-tetrahydro-1*H*,4*H*-3*a*-aza-1,6-disilaphenalene (5ua).**

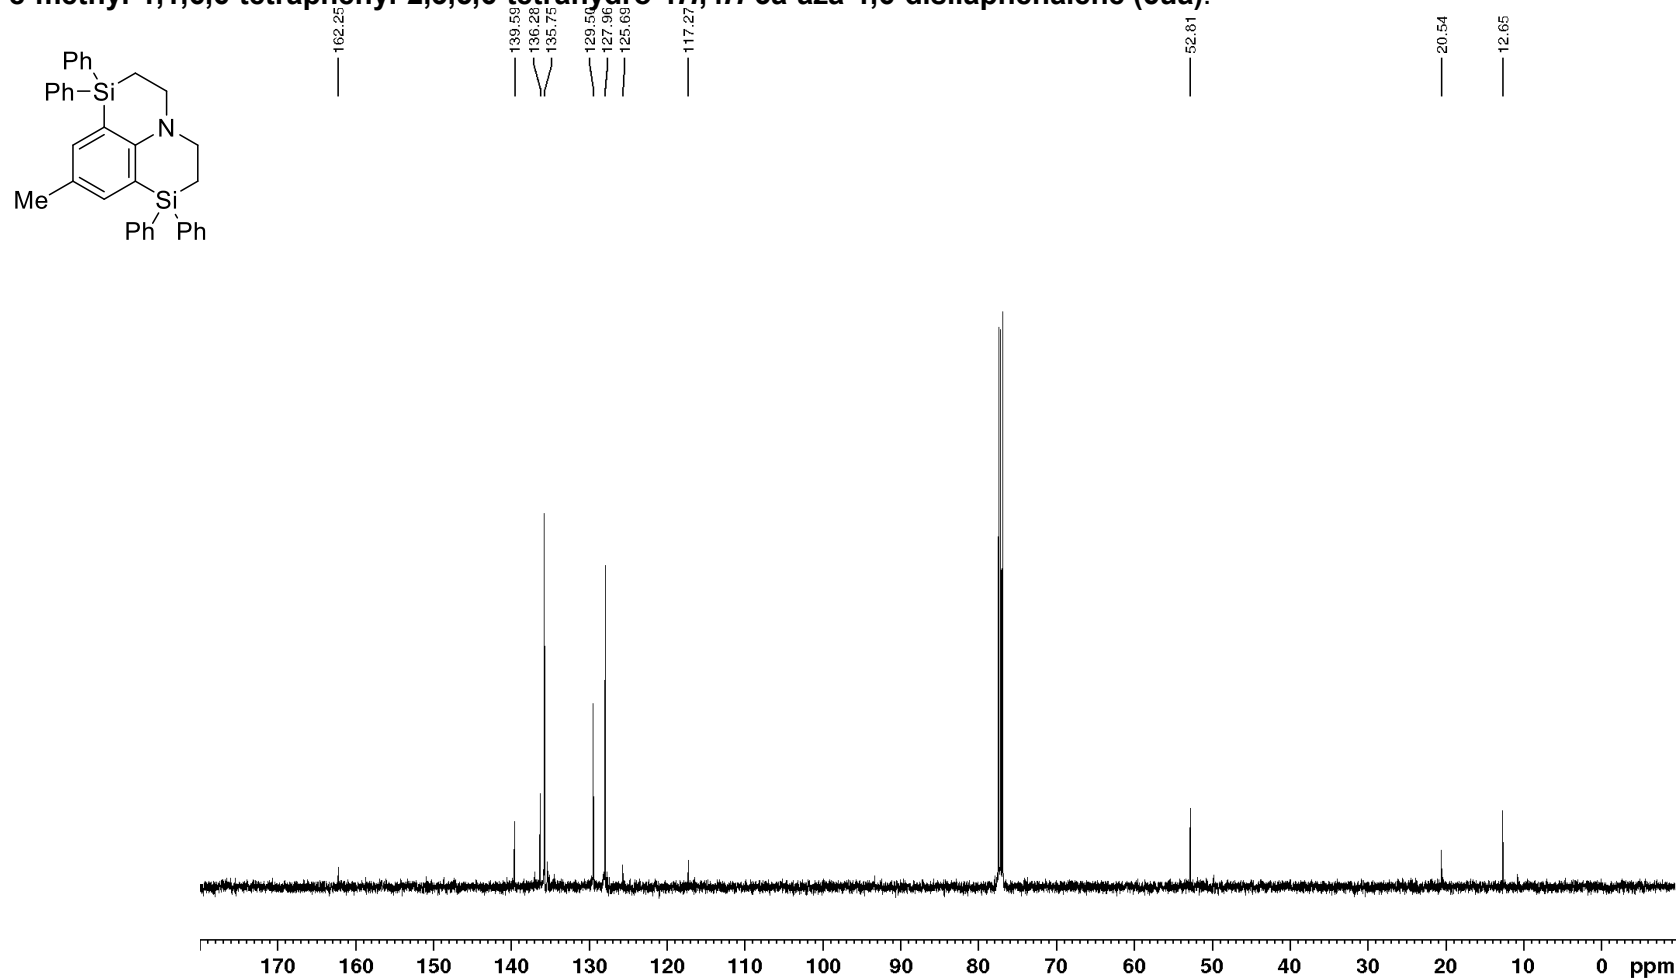

**Figure S72.**  $^1\text{H}/^{29}\text{Si}$  HMQC NMR (500/99 MHz,  $\text{CDCl}_3$ , 298 K, optimized for  $J = 7$  Hz) of **8-methyl-1,1,6,6-tetraphenyl-2,3,5,6-tetrahydro-1*H*,4*H*-3*a*-aza-1,6-disilaphenalene (5ua).**

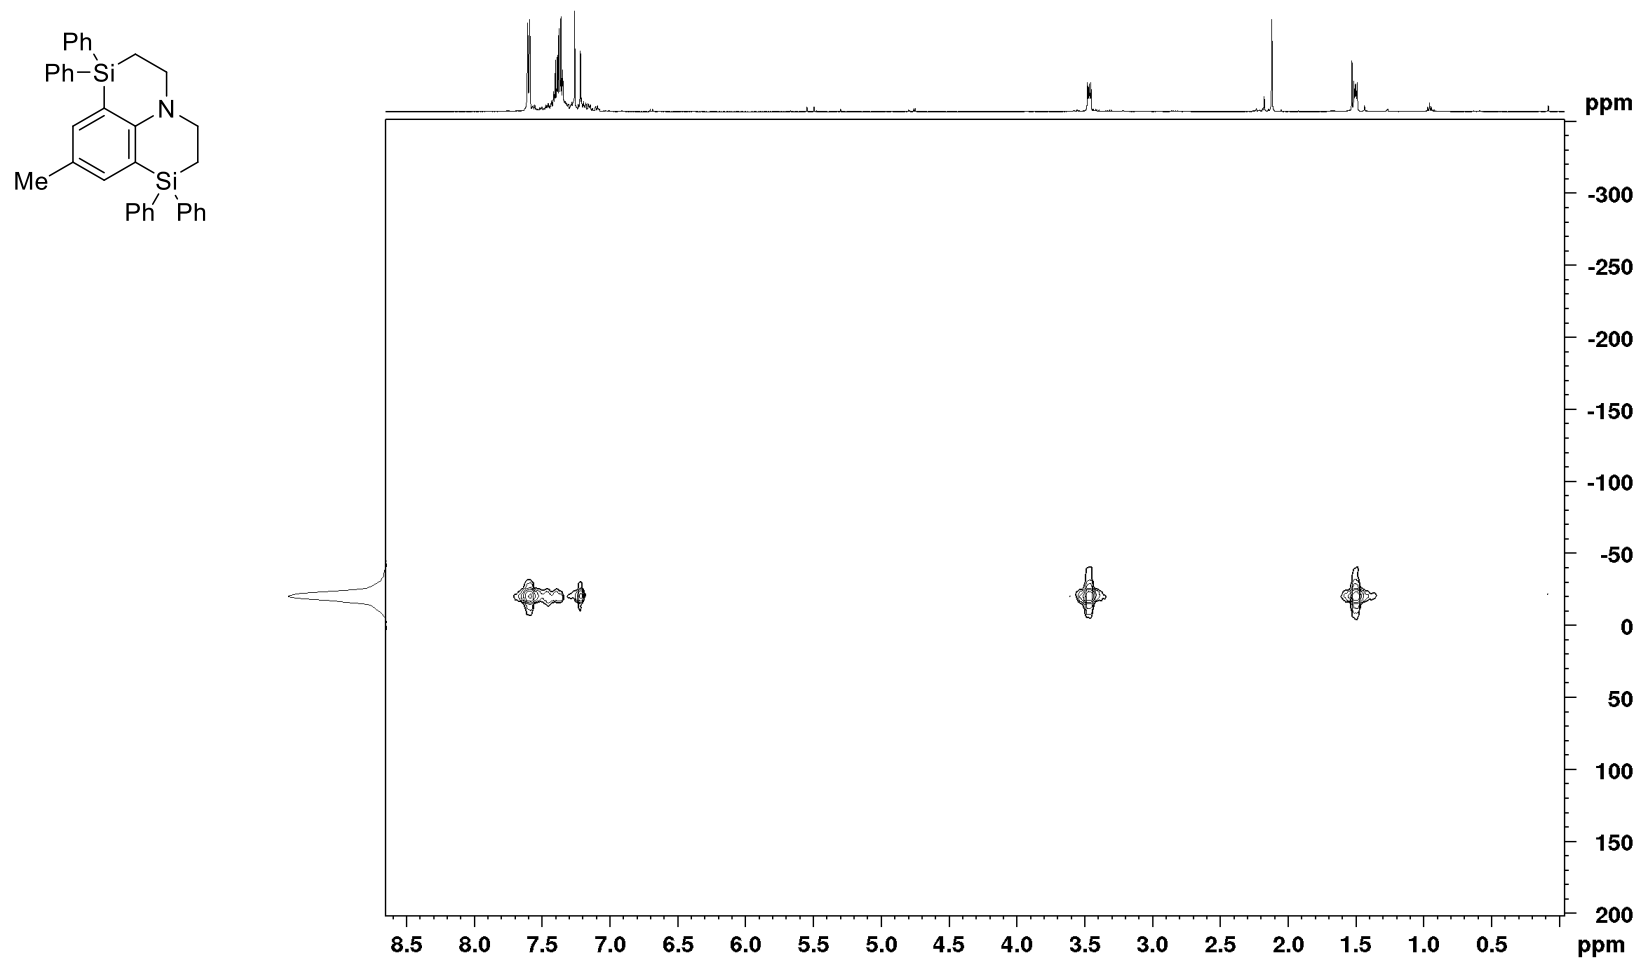

**Figure S73.**  $^1\text{H}$  NMR spectrum (500 MHz,  $\text{CDCl}_3$ , 298 K) of **1-benzyl-4,4-di-*p*-tolyl-1,4-azasilinane (3ab)**.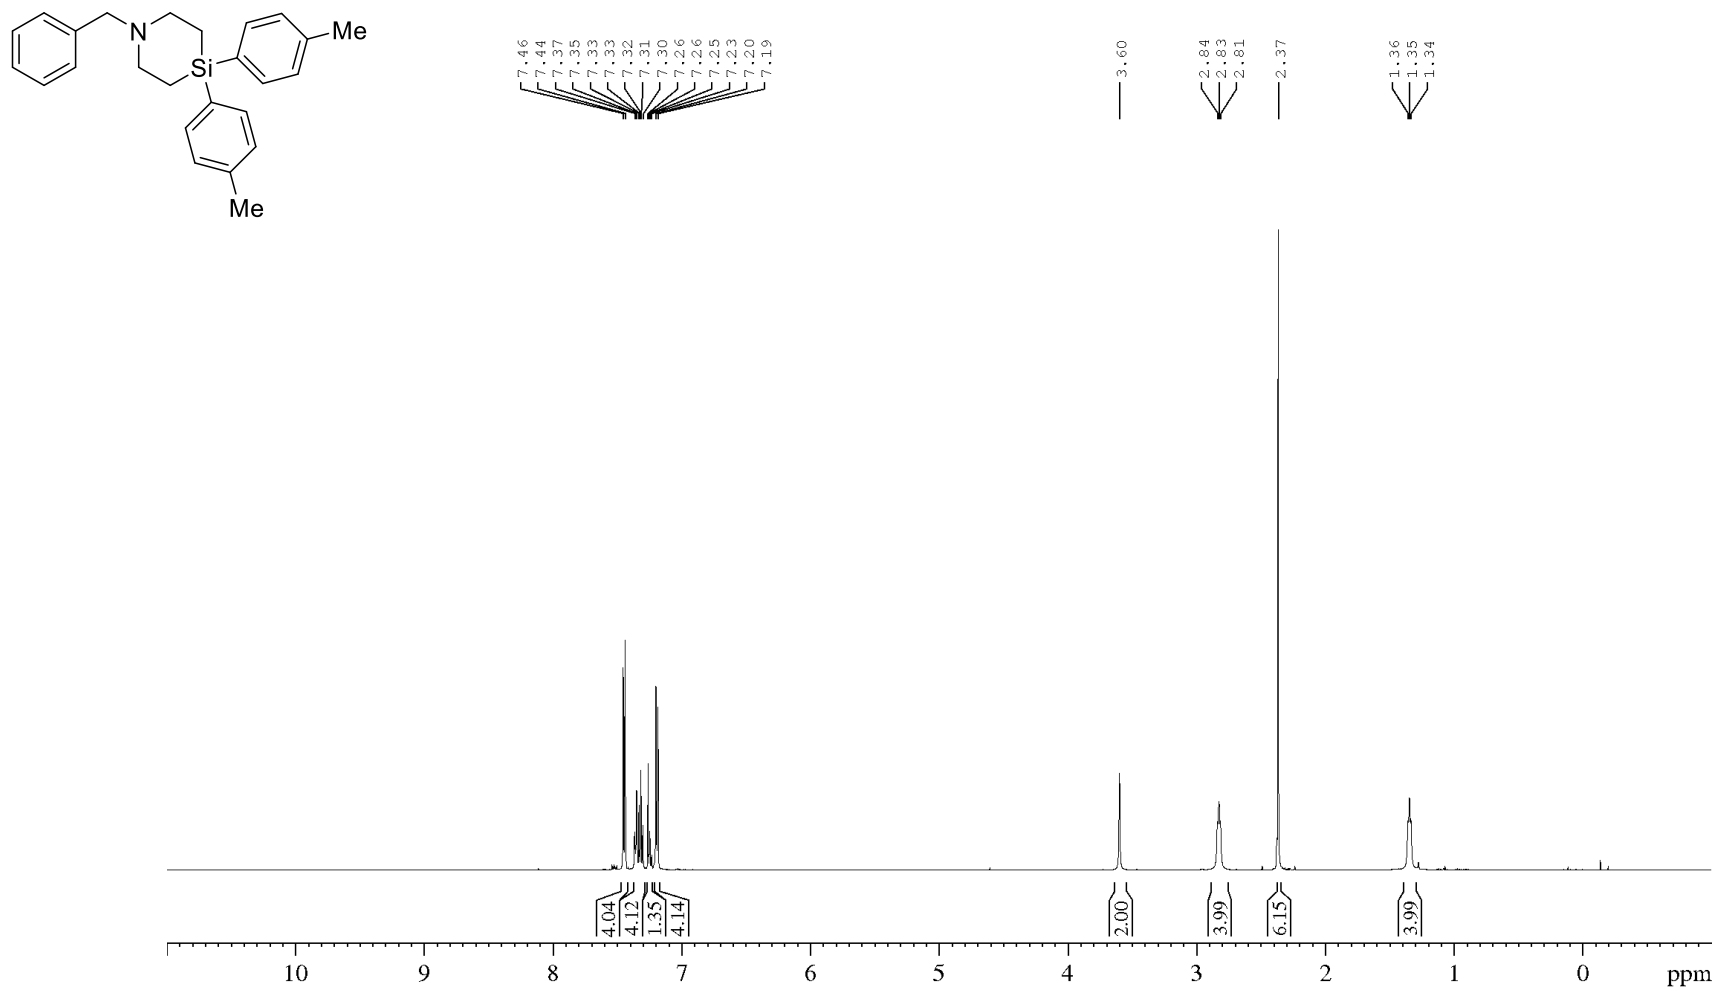

**Figure S74.**  $^{13}\text{C}$  NMR spectrum (125 MHz,  $\text{CDCl}_3$ , 298 K) of **1-benzyl-4,4-di-*p*-tolyl-1,4-azasilinane (3ab)**.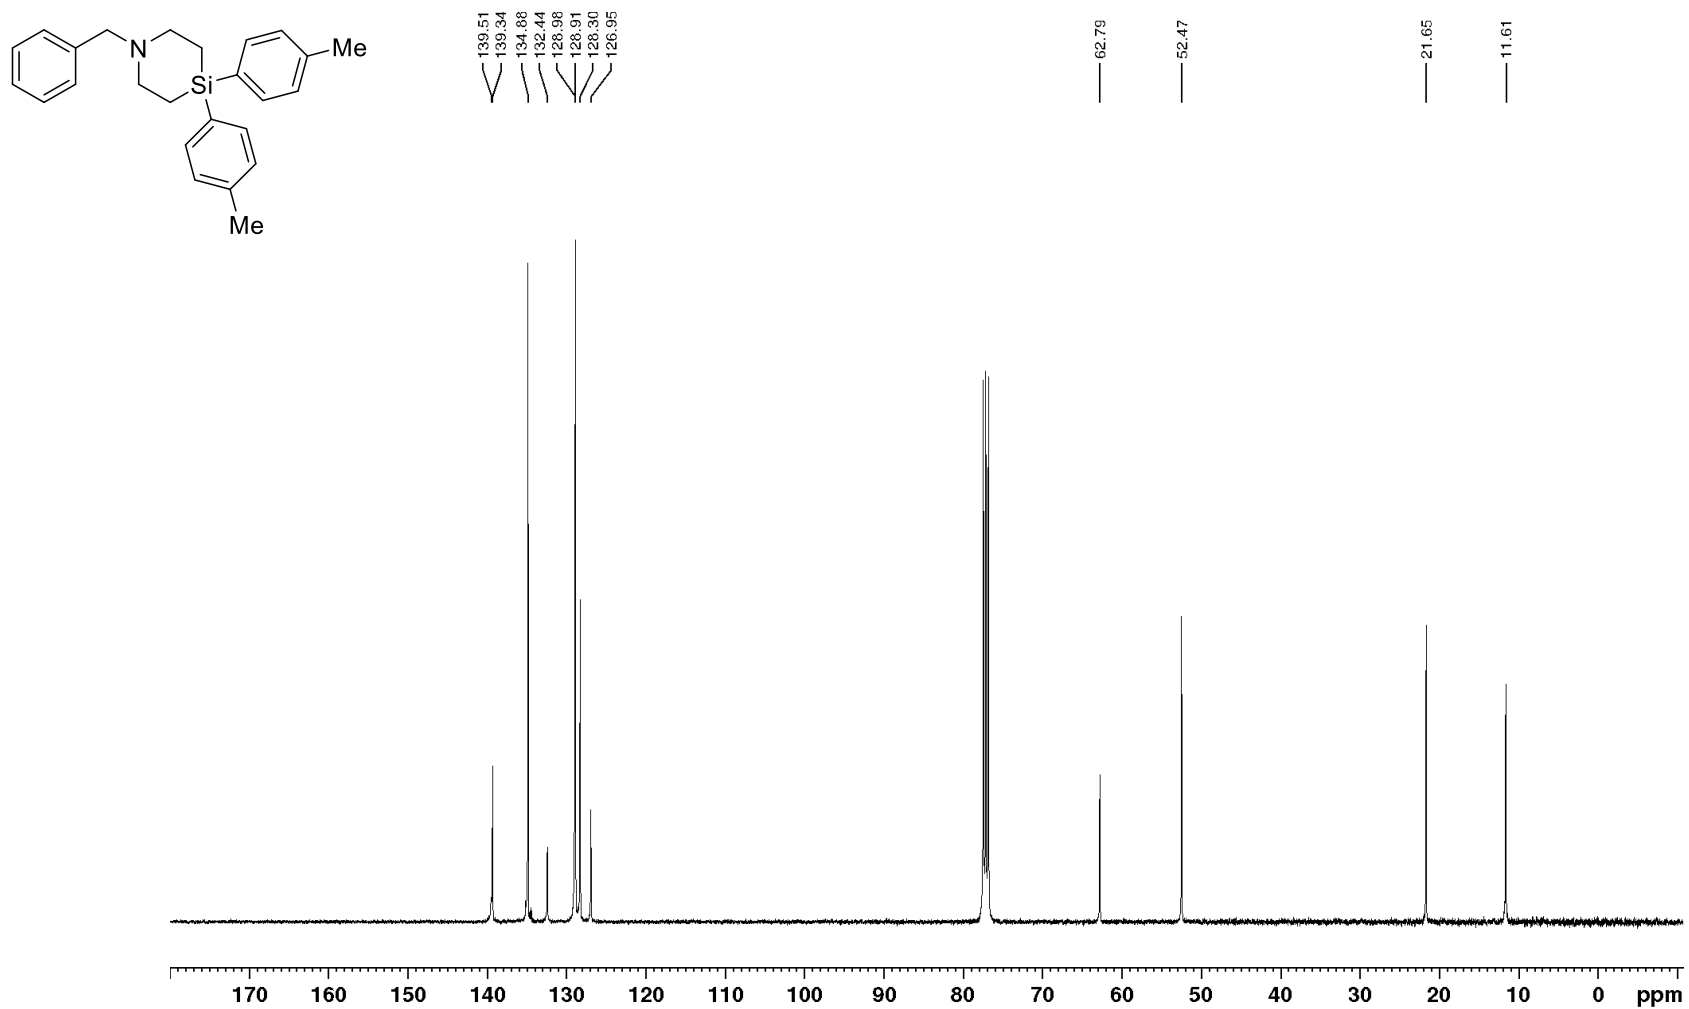



**Figure S75.**  $^1\text{H}/^{29}\text{Si}$  HMQC NMR (500/99 MHz,  $\text{CDCl}_3$ , 298 K, optimized for  $J = 7$  Hz) of **1-benzyl-4,4-di-*p*-tolyl-1,4-azasilinane (3ab)**.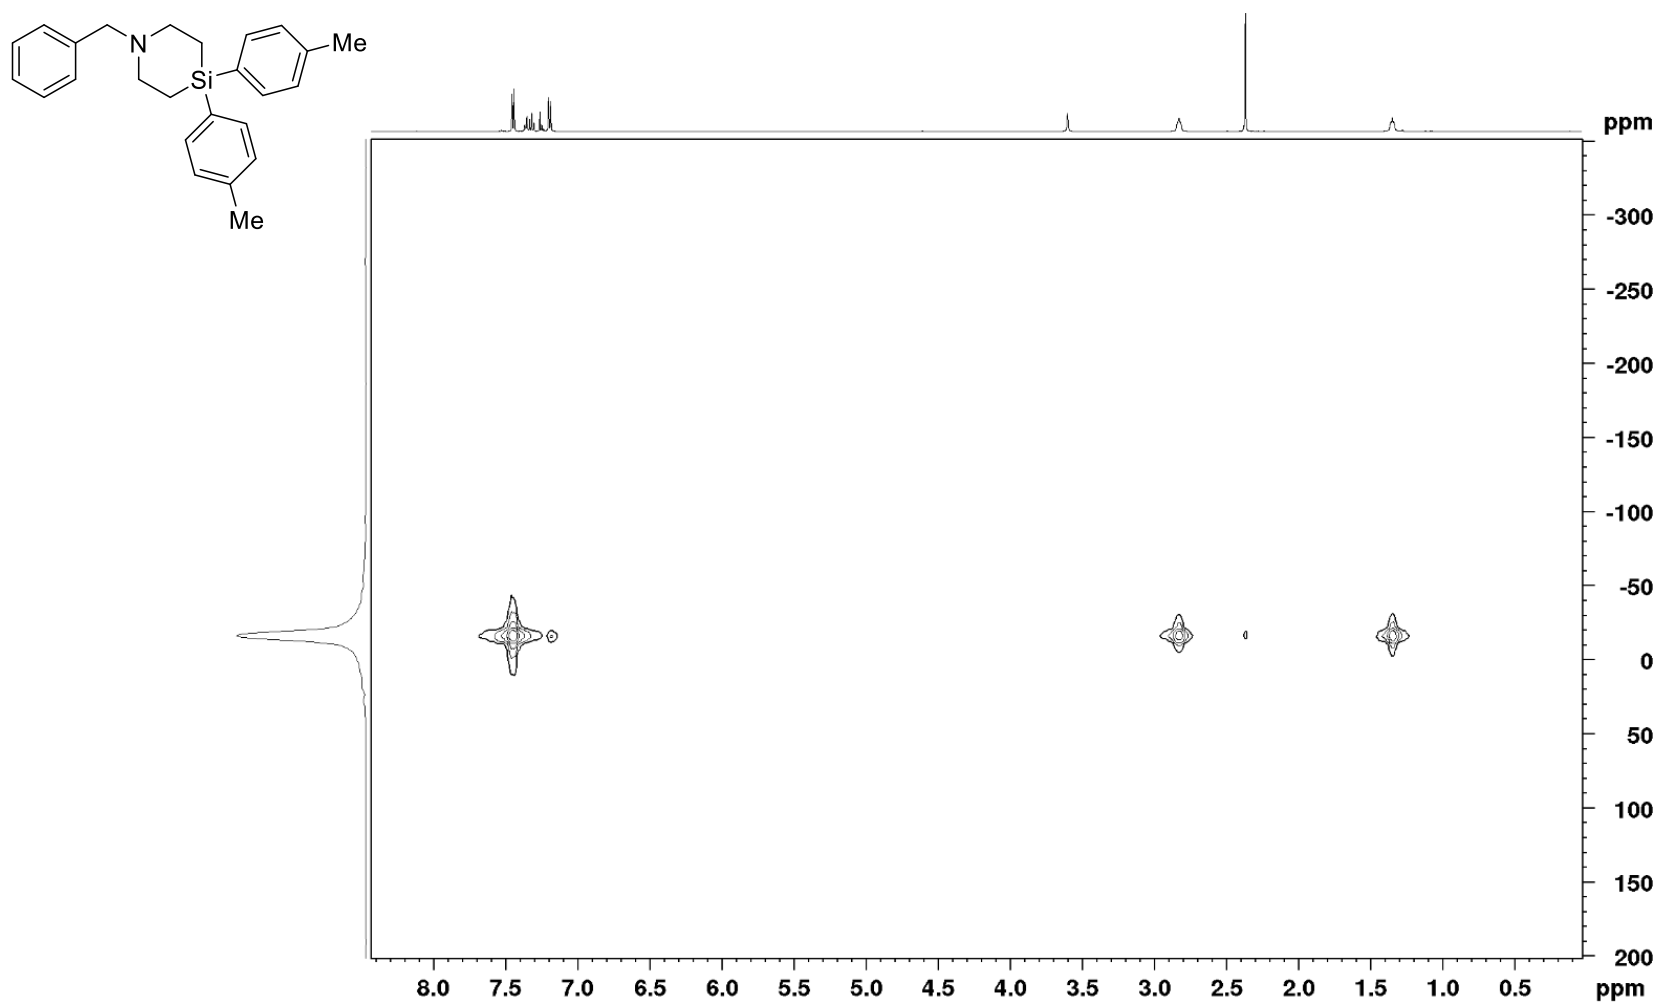

**Figure S76.**  $^1\text{H}$  NMR spectrum (500 MHz,  $\text{CDCl}_3$ , 298 K) of **1-benzyl-4,4-bis(4-(*tert*-butyl)phenyl)-1,4-azasilinane (3ac)**.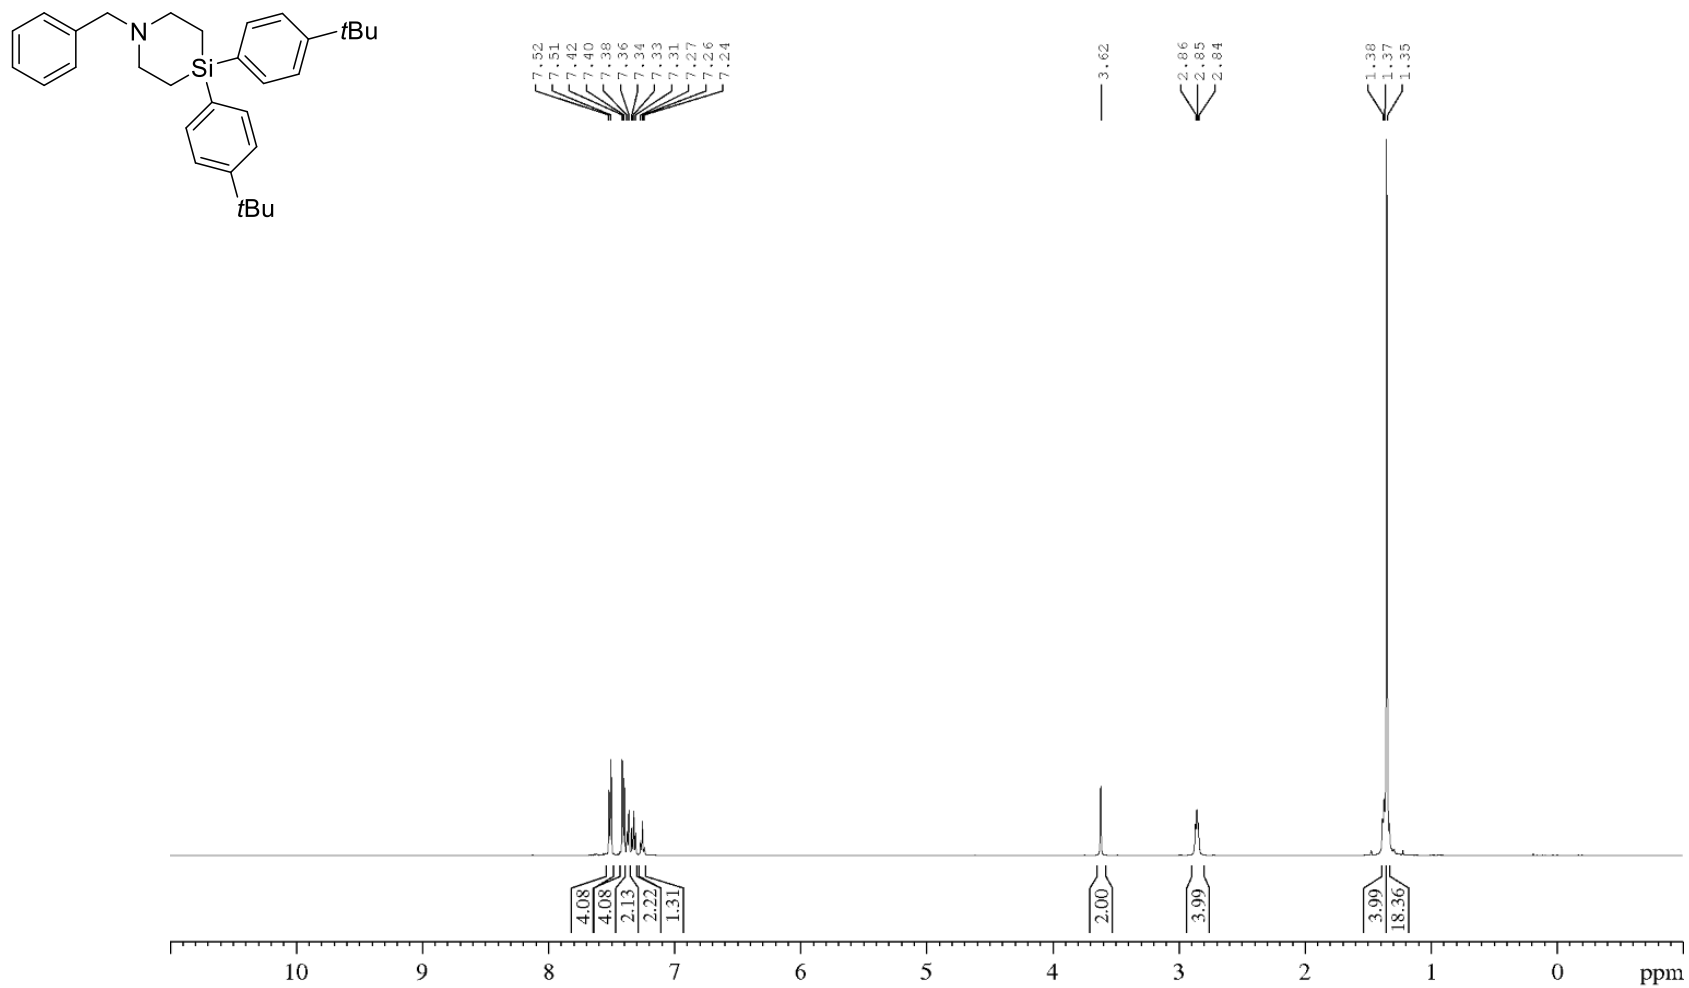

**Figure S77.**  $^{13}\text{C}$  NMR spectrum (125 MHz,  $\text{CDCl}_3$ , 298 K) of 1-benzyl-4,4-bis(4-*tert*-butylphenyl)-1,4-azasilinane (**3ac**).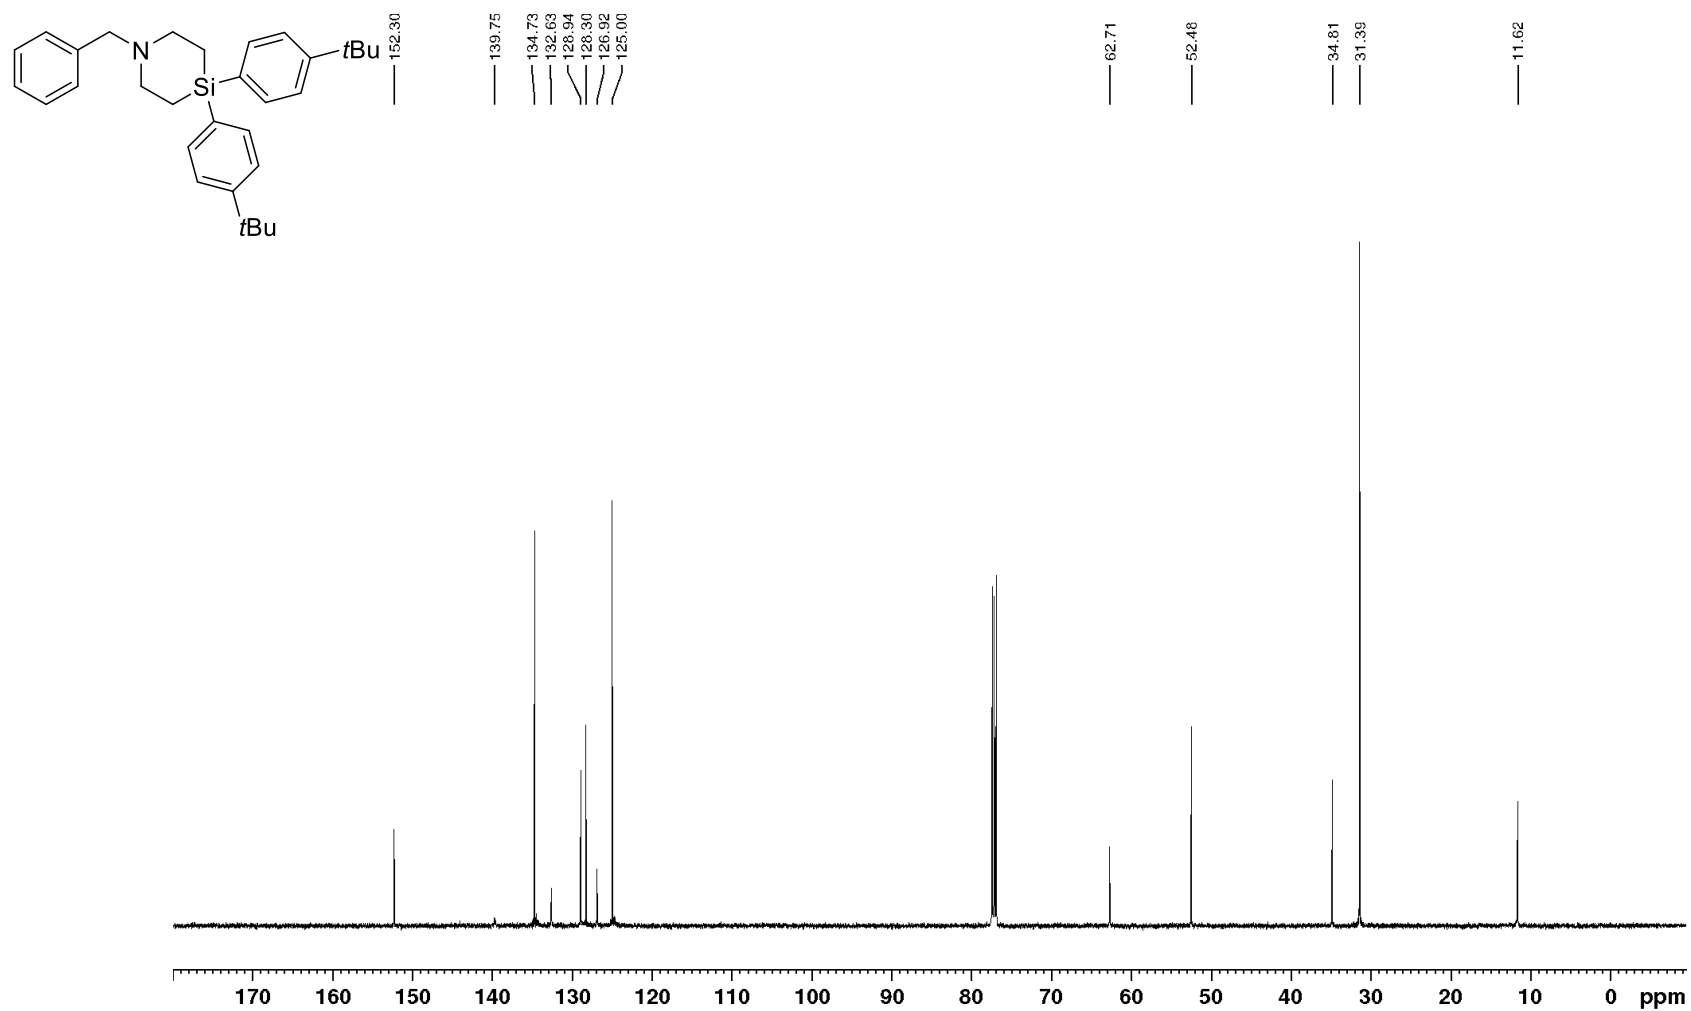

**Figure S78.**  $^1\text{H}/^{29}\text{Si}$  HMQC NMR (500/99 MHz,  $\text{CDCl}_3$ , 298 K, optimized for  $J = 7$  Hz) of **1-benzyl-4,4-bis(4-(*tert*-butyl)phenyl)-1,4-azasilinane (3ac)**.

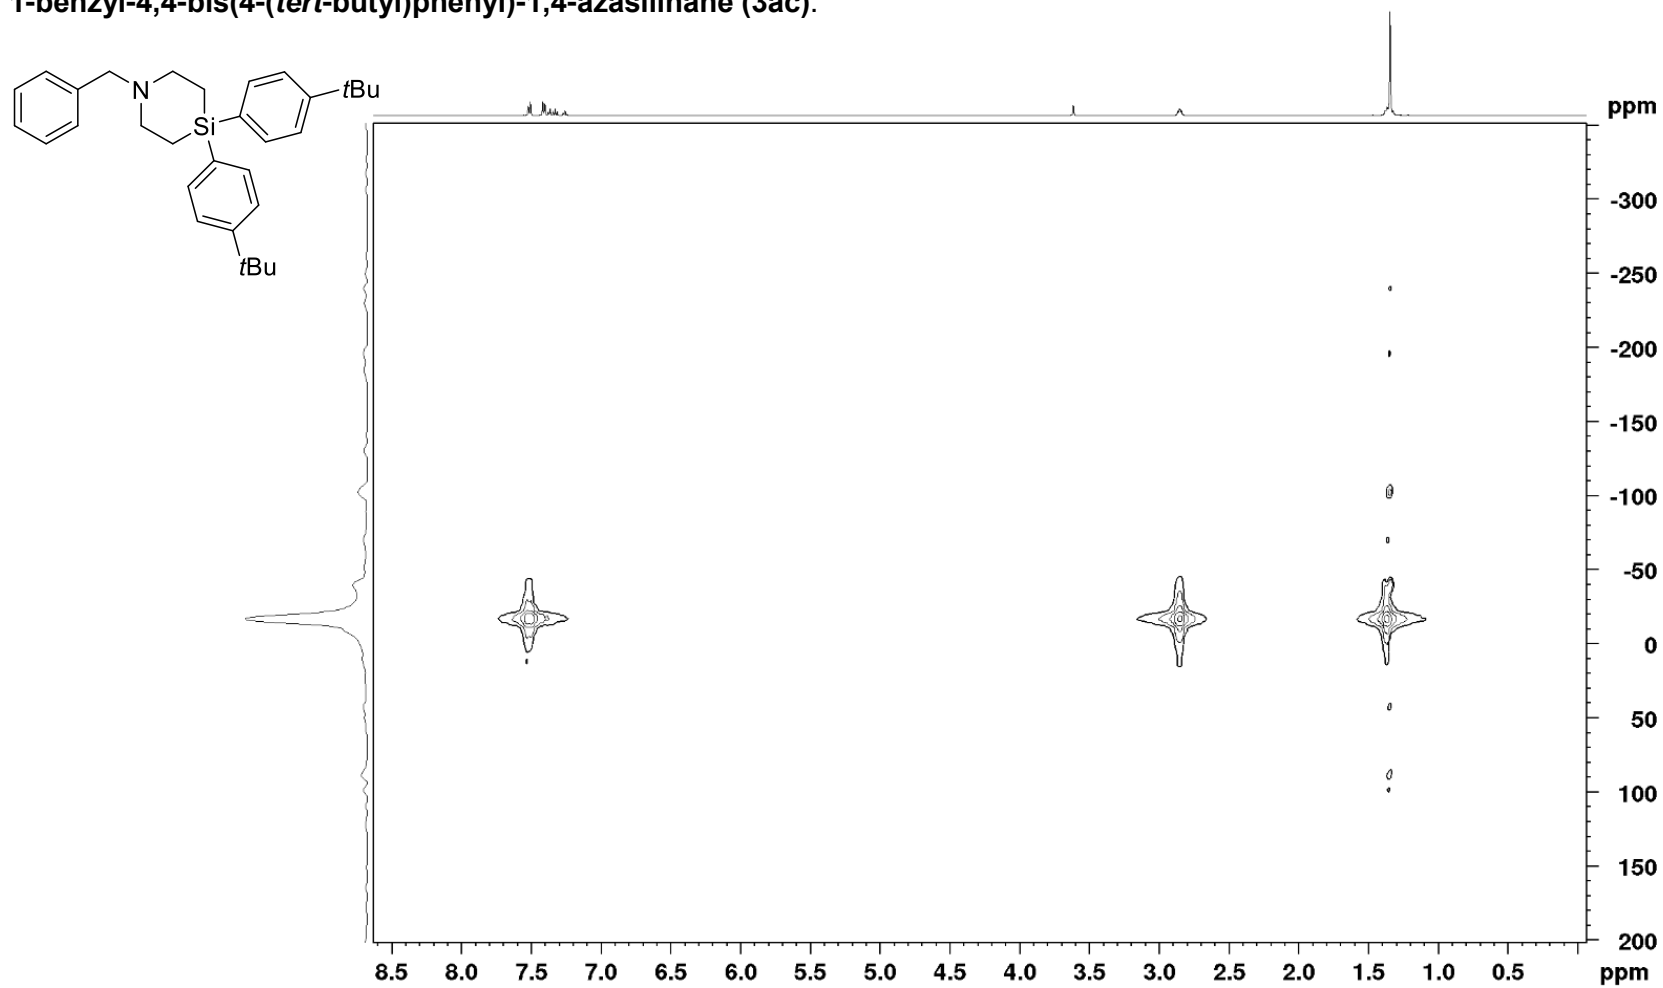

**Figure S79.**  $^1\text{H}$  NMR spectrum (500 MHz,  $\text{CDCl}_3$ , 298 K) of **1-benzyl-4,4-bis(4-fluorophenyl)-1,4-azasilinane (3ad)**.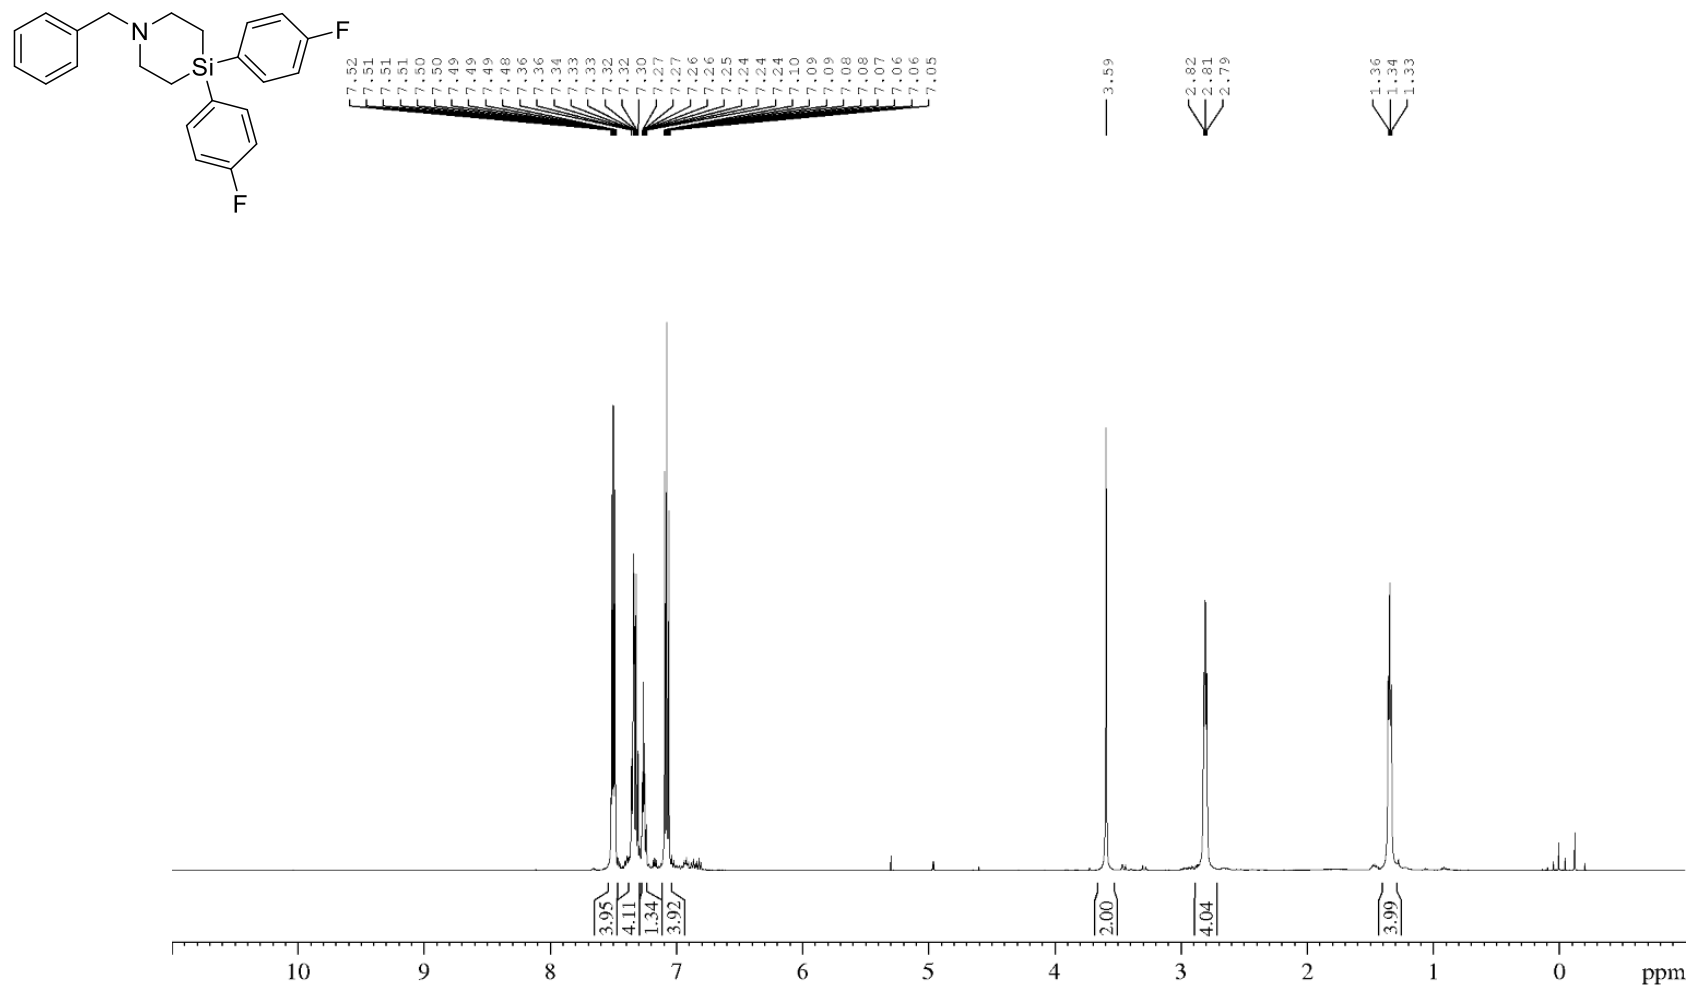

**Figure S80.**  $^{13}\text{C}$  NMR spectrum (125 MHz,  $\text{CDCl}_3$ , 298 K) of 1-benzyl-4,4-bis(4-fluorophenyl)-1,4-azasilinane (**3ad**).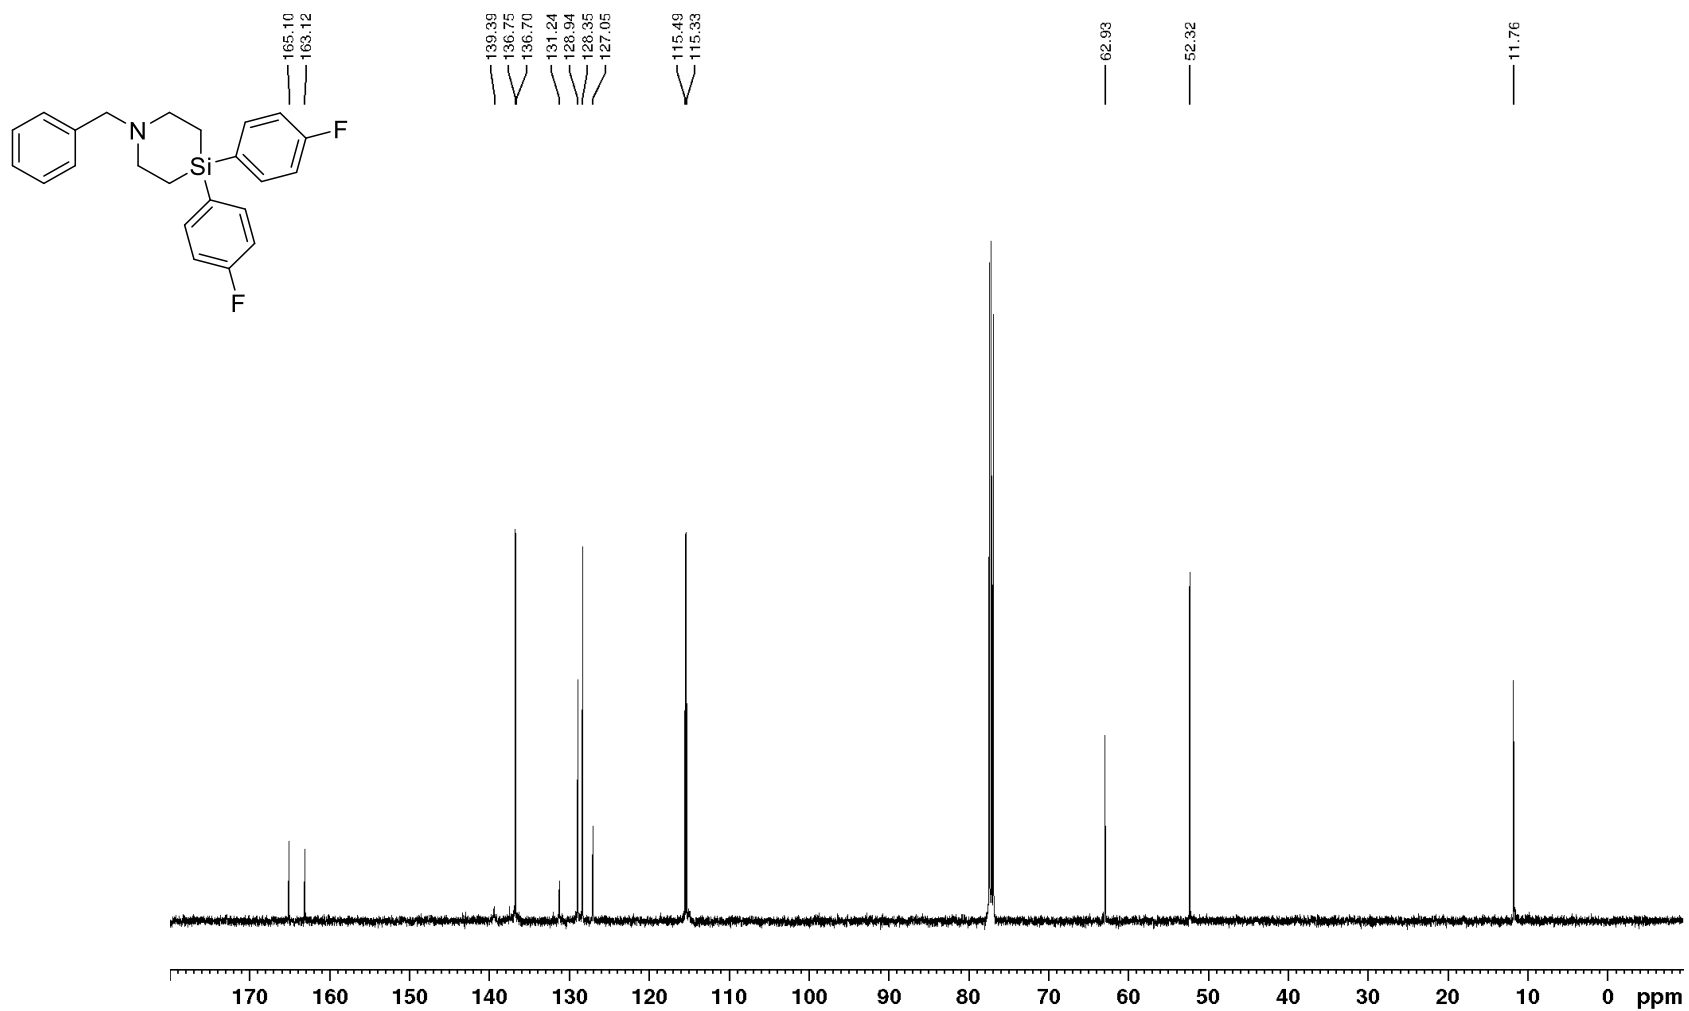

**Figure S81.**  $^{19}\text{F}$  NMR spectrum (471 MHz,  $\text{CDCl}_3$ , 298 K) of **1-benzyl-4,4-bis(4-fluorophenyl)-1,4-azasilinane (3ad)**.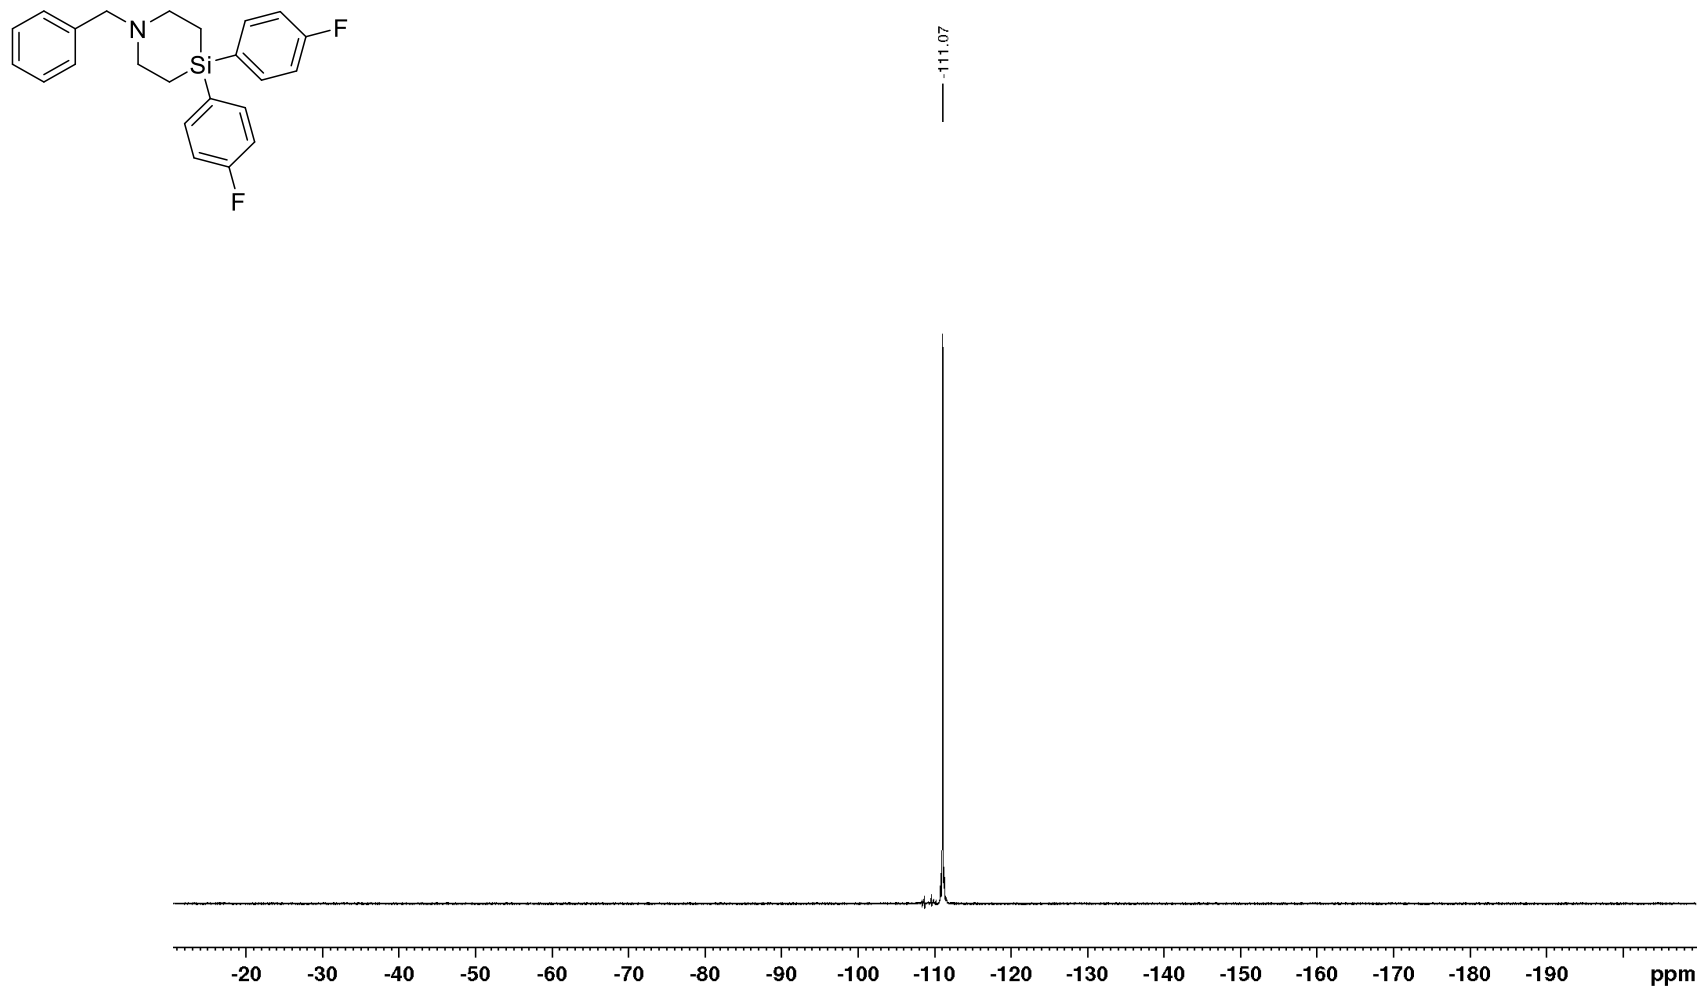

**Figure S82.**  $^1\text{H}/^{29}\text{Si}$  HMQC NMR (500/99 MHz,  $\text{CDCl}_3$ , 298 K, optimized for  $J = 7$  Hz) of **1-benzyl-4,4-bis(4-fluorophenyl)-1,4-azasilinane (3ad)**.

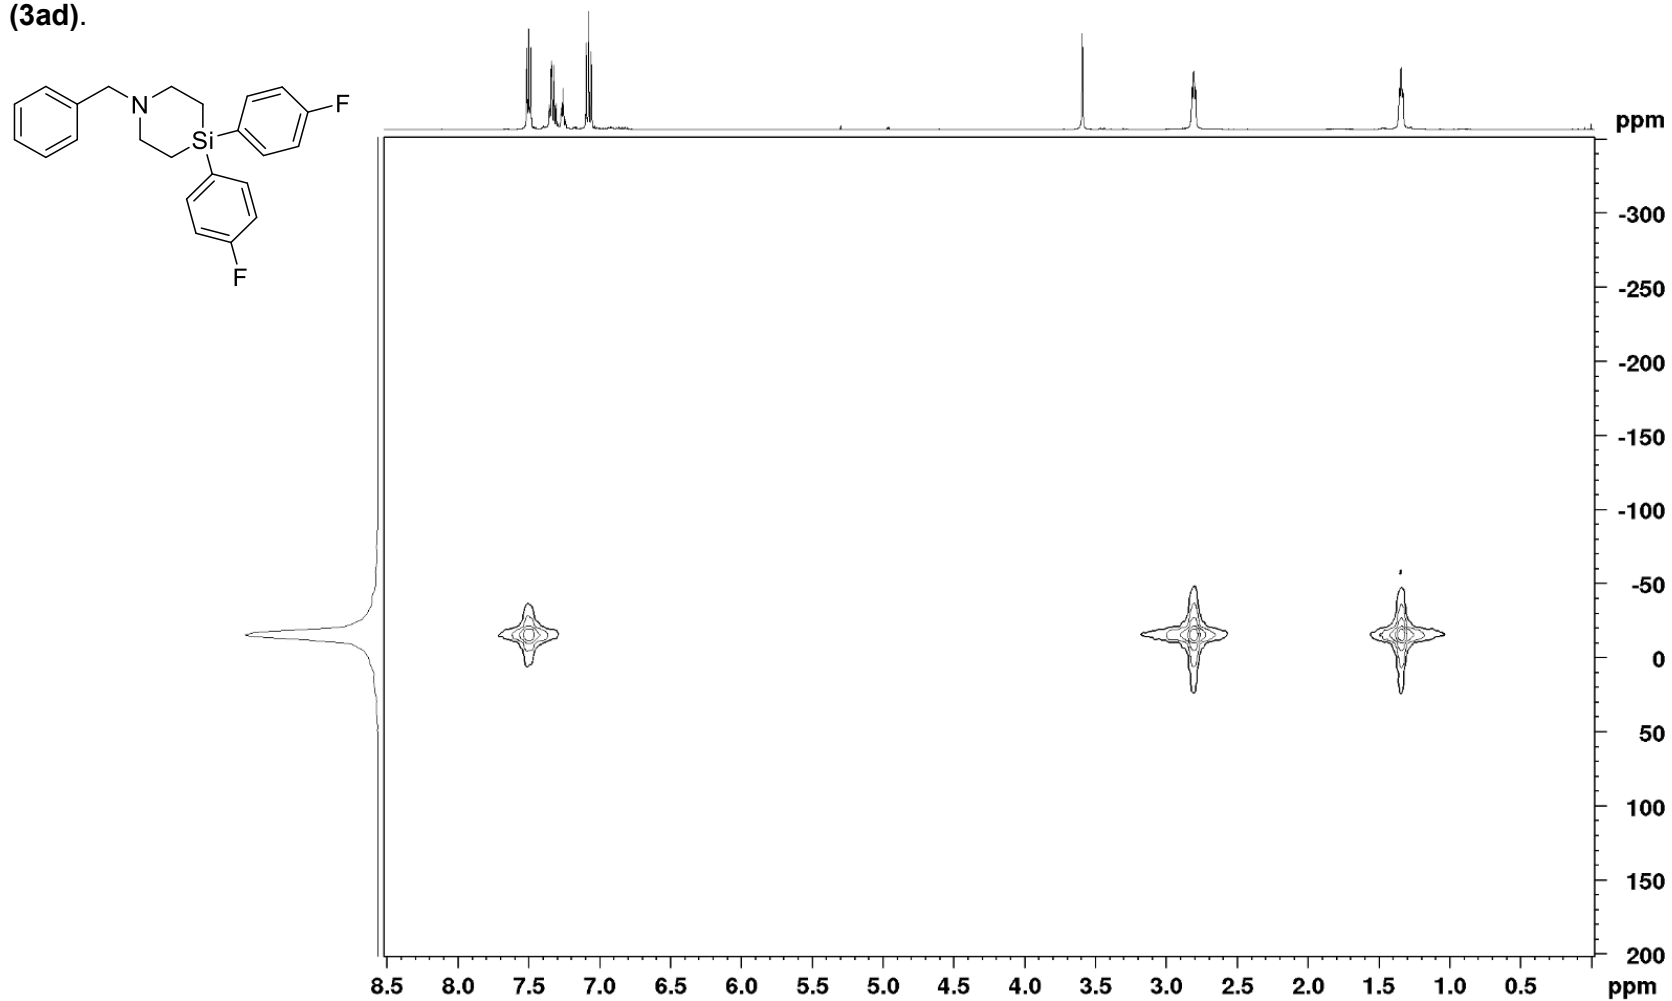



**Figure S83.**  $^1\text{H}$  NMR spectrum (500 MHz,  $\text{CDCl}_3$ , 298 K) of **1-benzyl-4-(naphthalen-1-yl)-4-phenyl-1,4-azasilinane (3ae)**.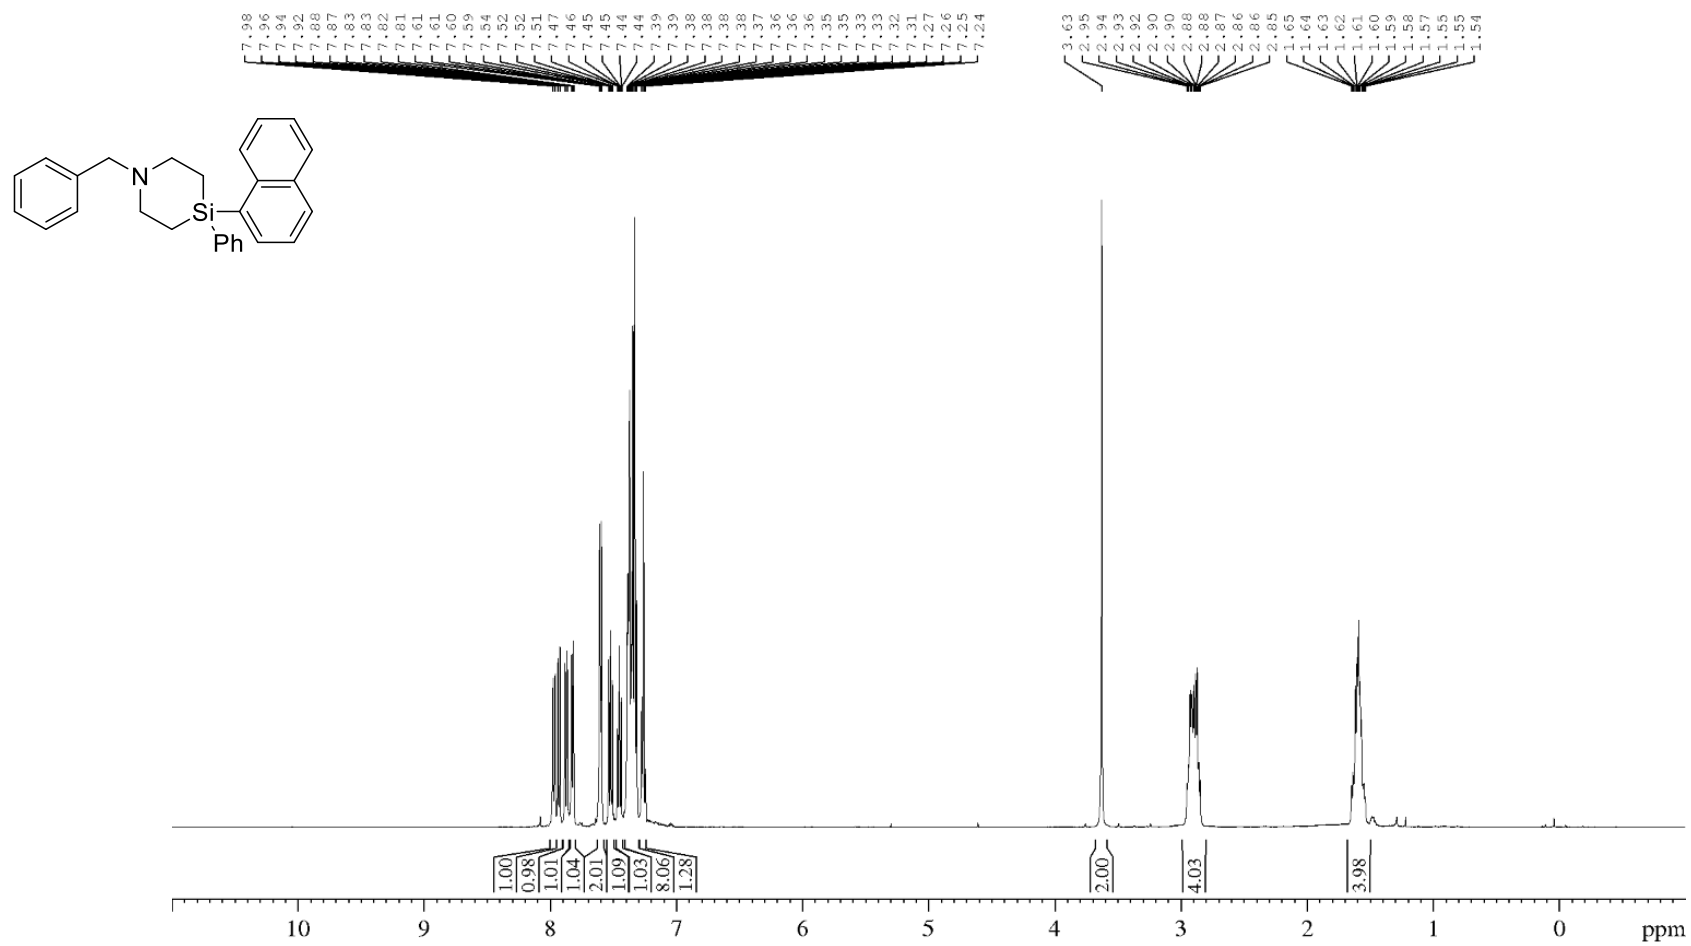

**Figure S84.**  $^{13}\text{C}$  NMR spectrum (125 MHz,  $\text{CDCl}_3$ , 298 K) of 1-benzyl-4-(naphthalen-1-yl)-4-phenyl-1,4-azasilinane (**3ae**).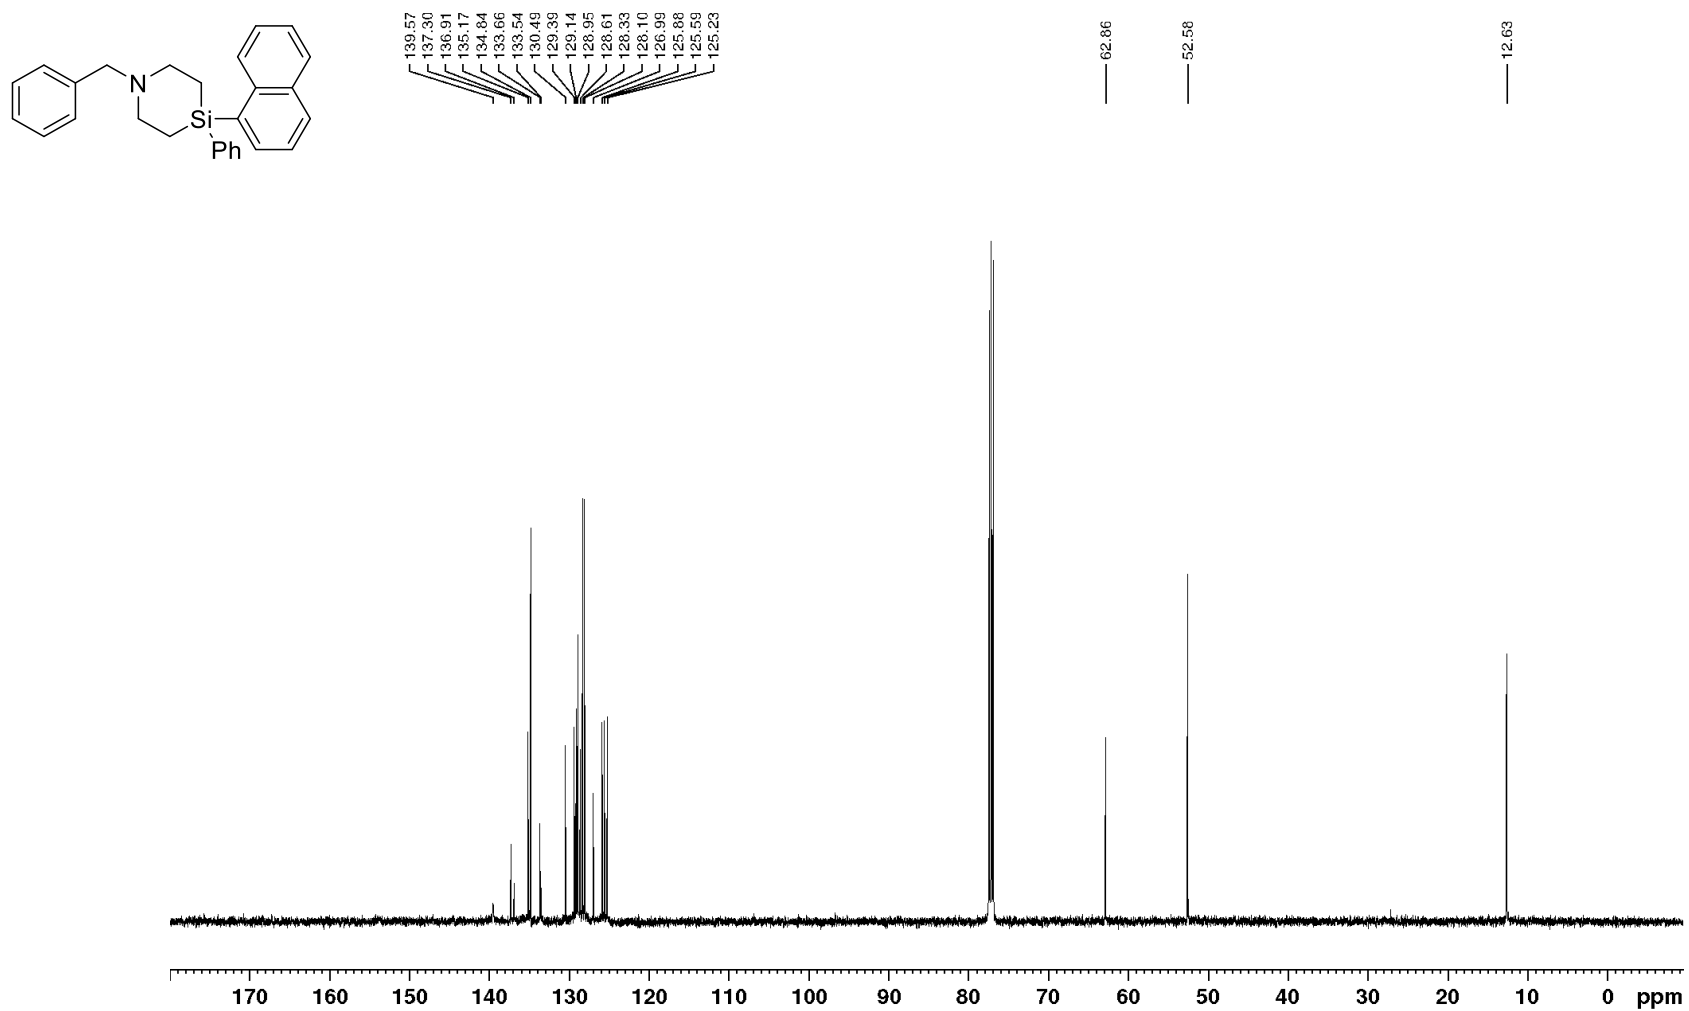

**Figure S85.**  $^1\text{H}/^{29}\text{Si}$  HMQC NMR (500/99 MHz,  $\text{CDCl}_3$ , 298 K, optimized for  $J = 7$  Hz) of **1-benzyl-4-(naphthalen-1-yl)-4-phenyl-1,4-aza-silinanane (3ae)**.

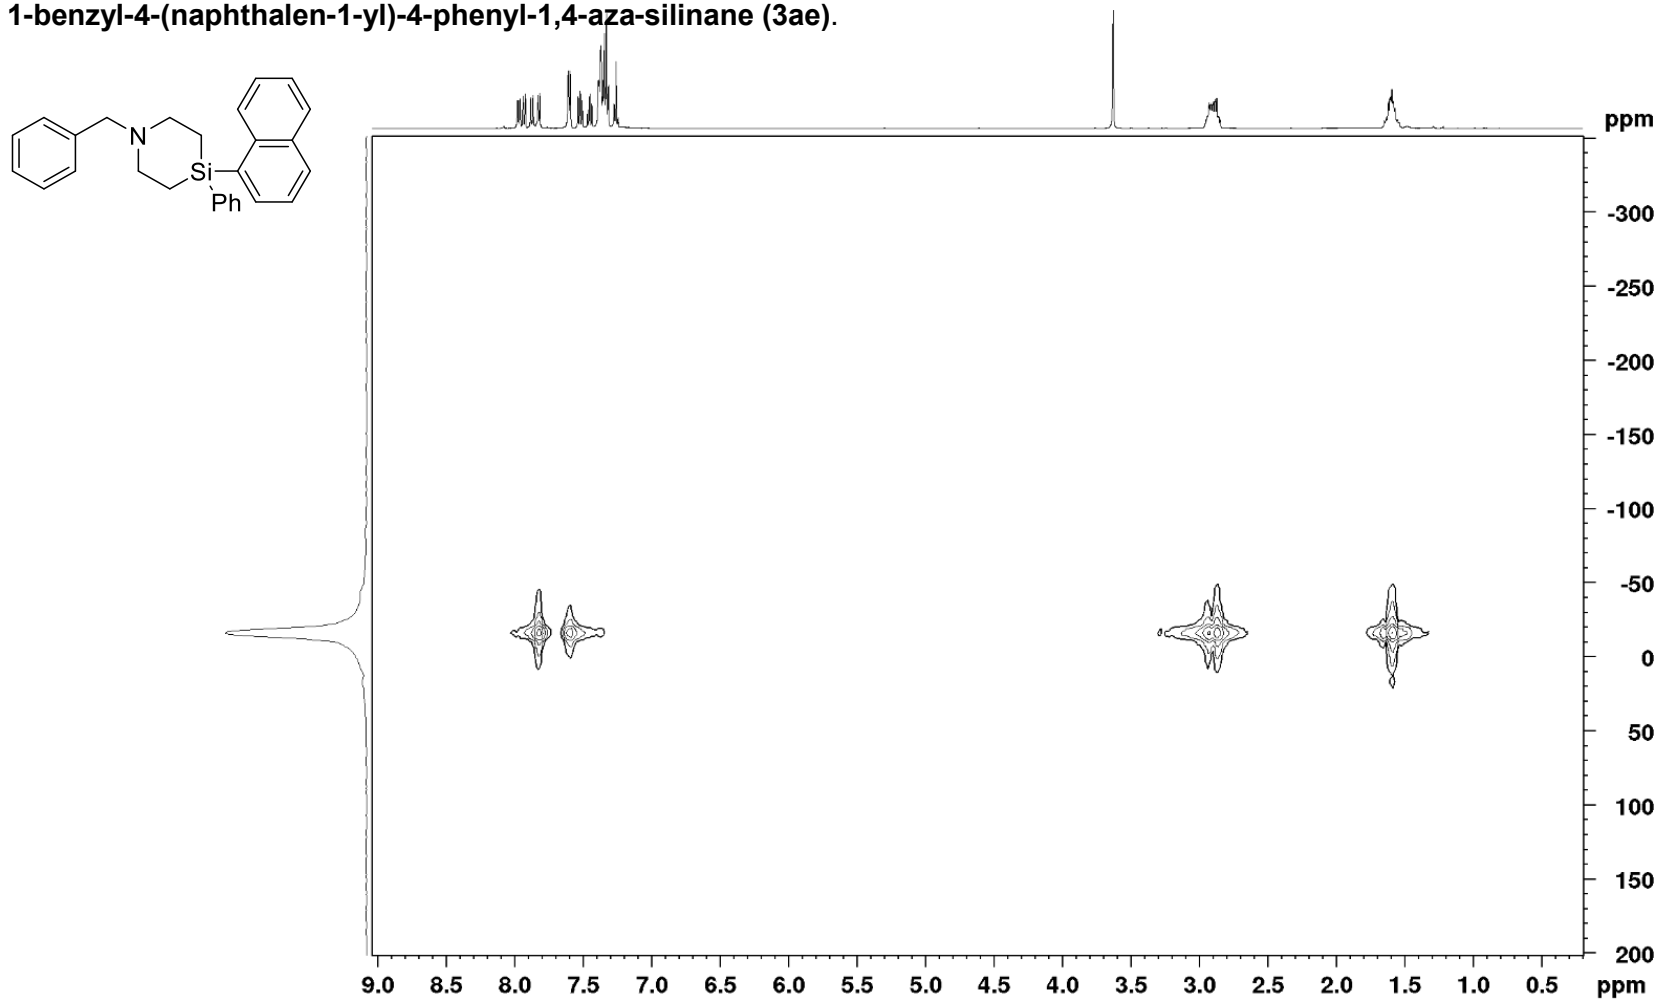

**Figure S86.**  $^1\text{H}$  NMR spectrum (500 MHz,  $\text{CDCl}_3$ , 298 K) of **1-benzyl-4-methyl-4-phenyl-1,4-azasilinane (3ag)**.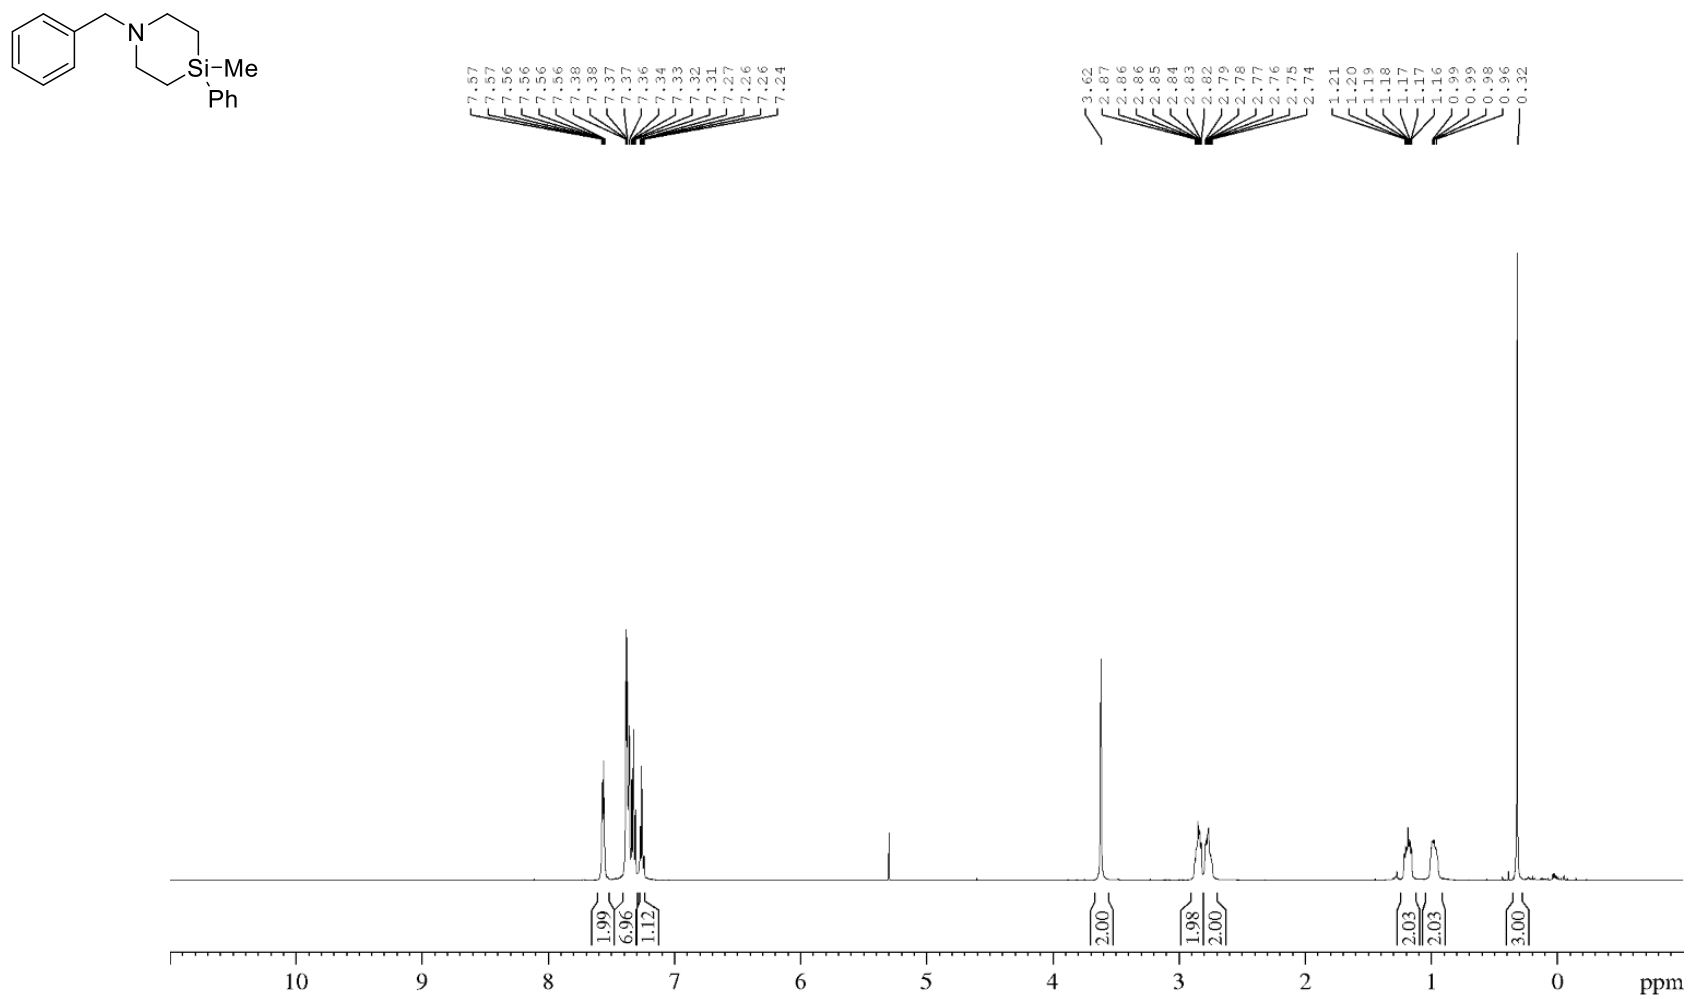

**Figure S87.**  $^{13}\text{C}$  NMR spectrum (125 MHz,  $\text{CDCl}_3$ , 298 K) of **1-benzyl-4-methyl-4-phenyl-1,4-azasilinane (3ag)**.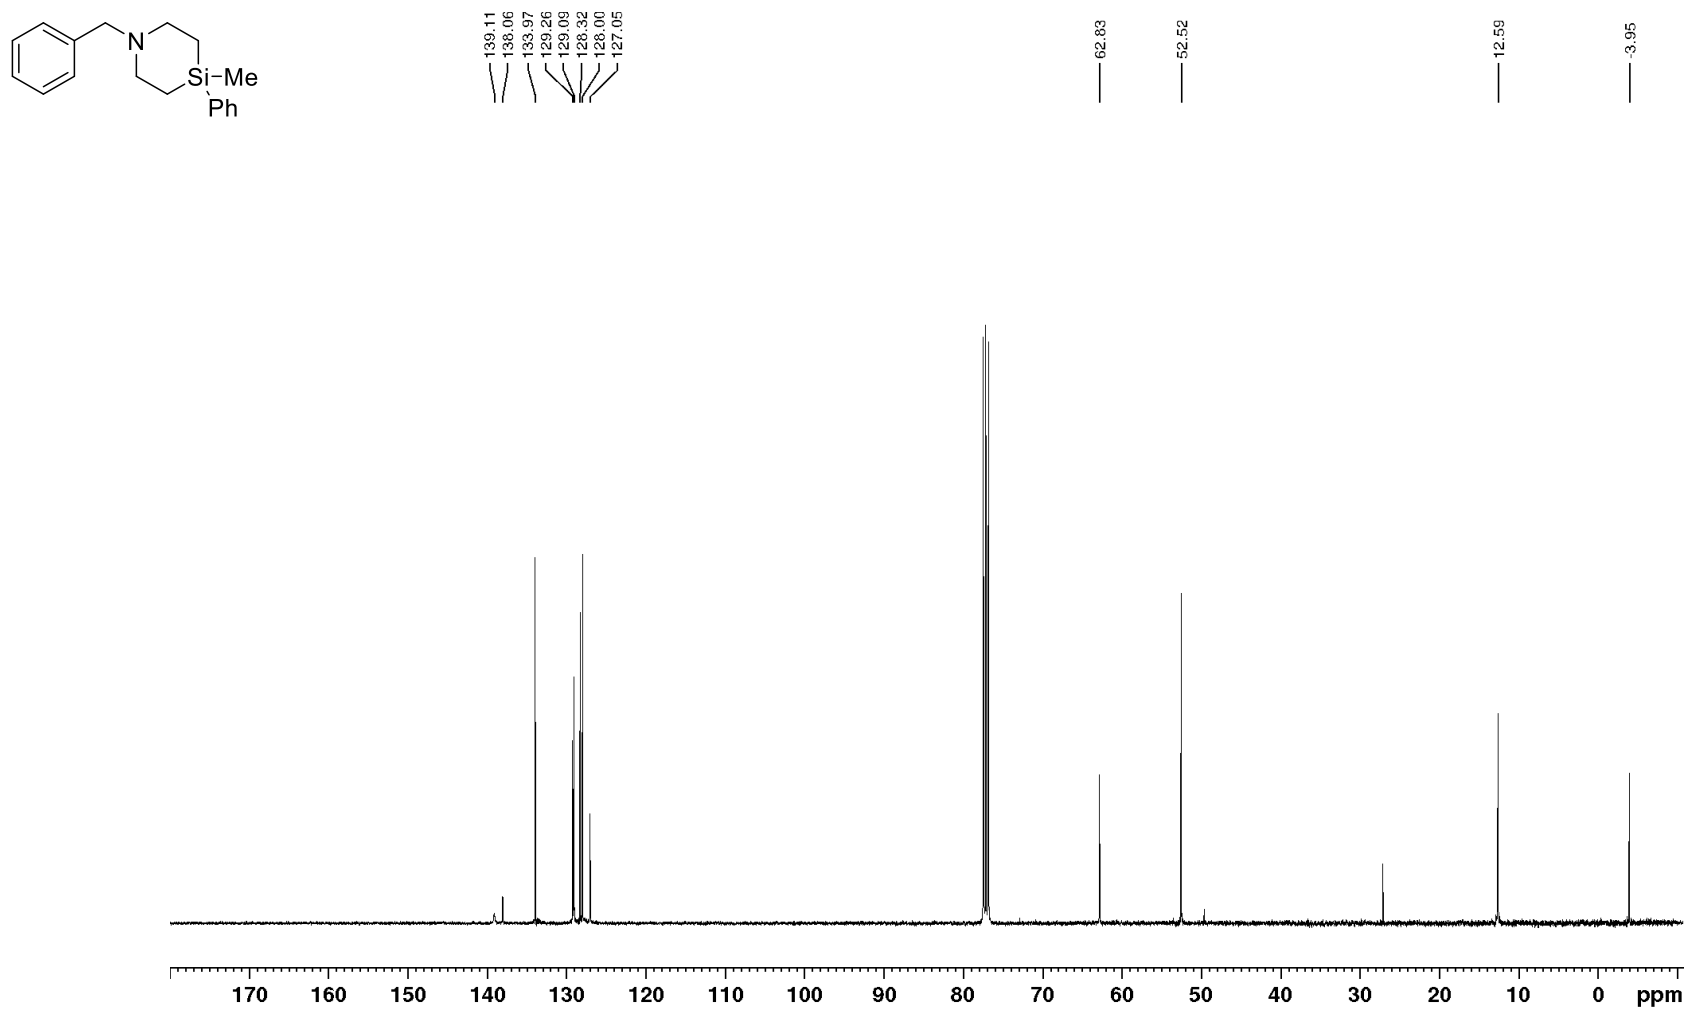

**Figure S88.**  $^1\text{H}/^{29}\text{Si}$  HMQC NMR (500/99 MHz,  $\text{CDCl}_3$ , 298 K, optimized for  $J = 7$  Hz) of **1-benzyl-4-methyl-4-phenyl-1,4-azasilinane (3ag)**.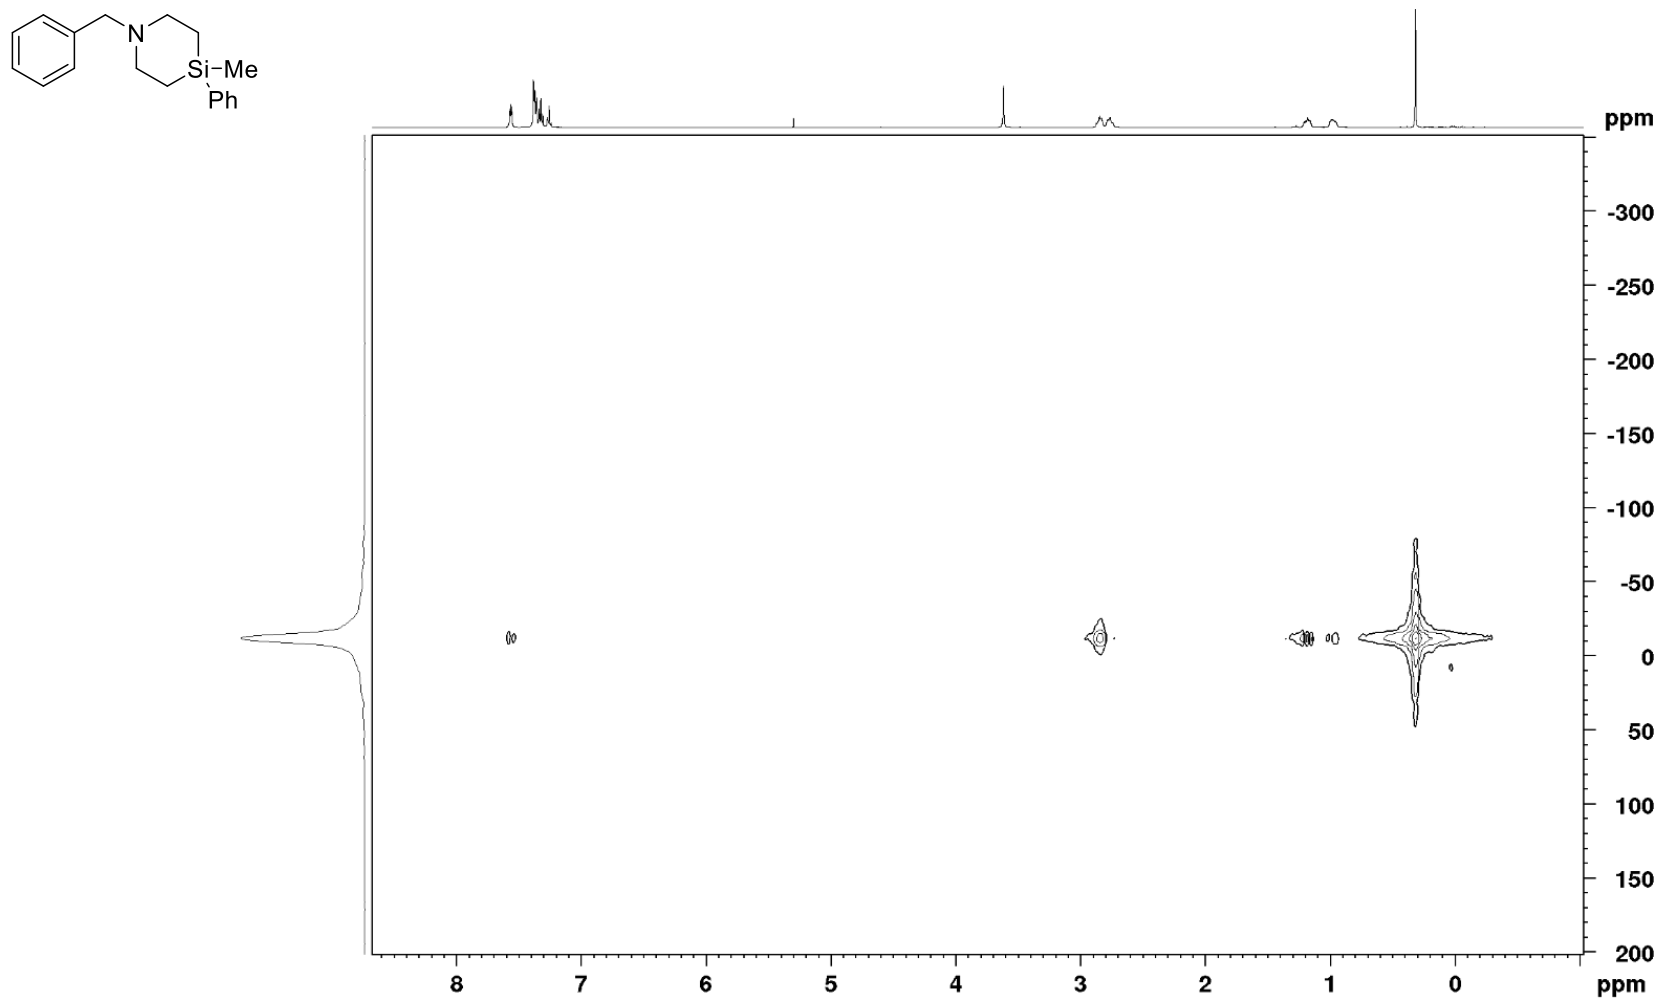

**Figure S89.**  $^1\text{H}$  NMR spectrum (500 MHz,  $\text{CDCl}_3$ , 298 K) of **1-benzyl-4,4-diethyl-1,4-azasilinane (3ai)**.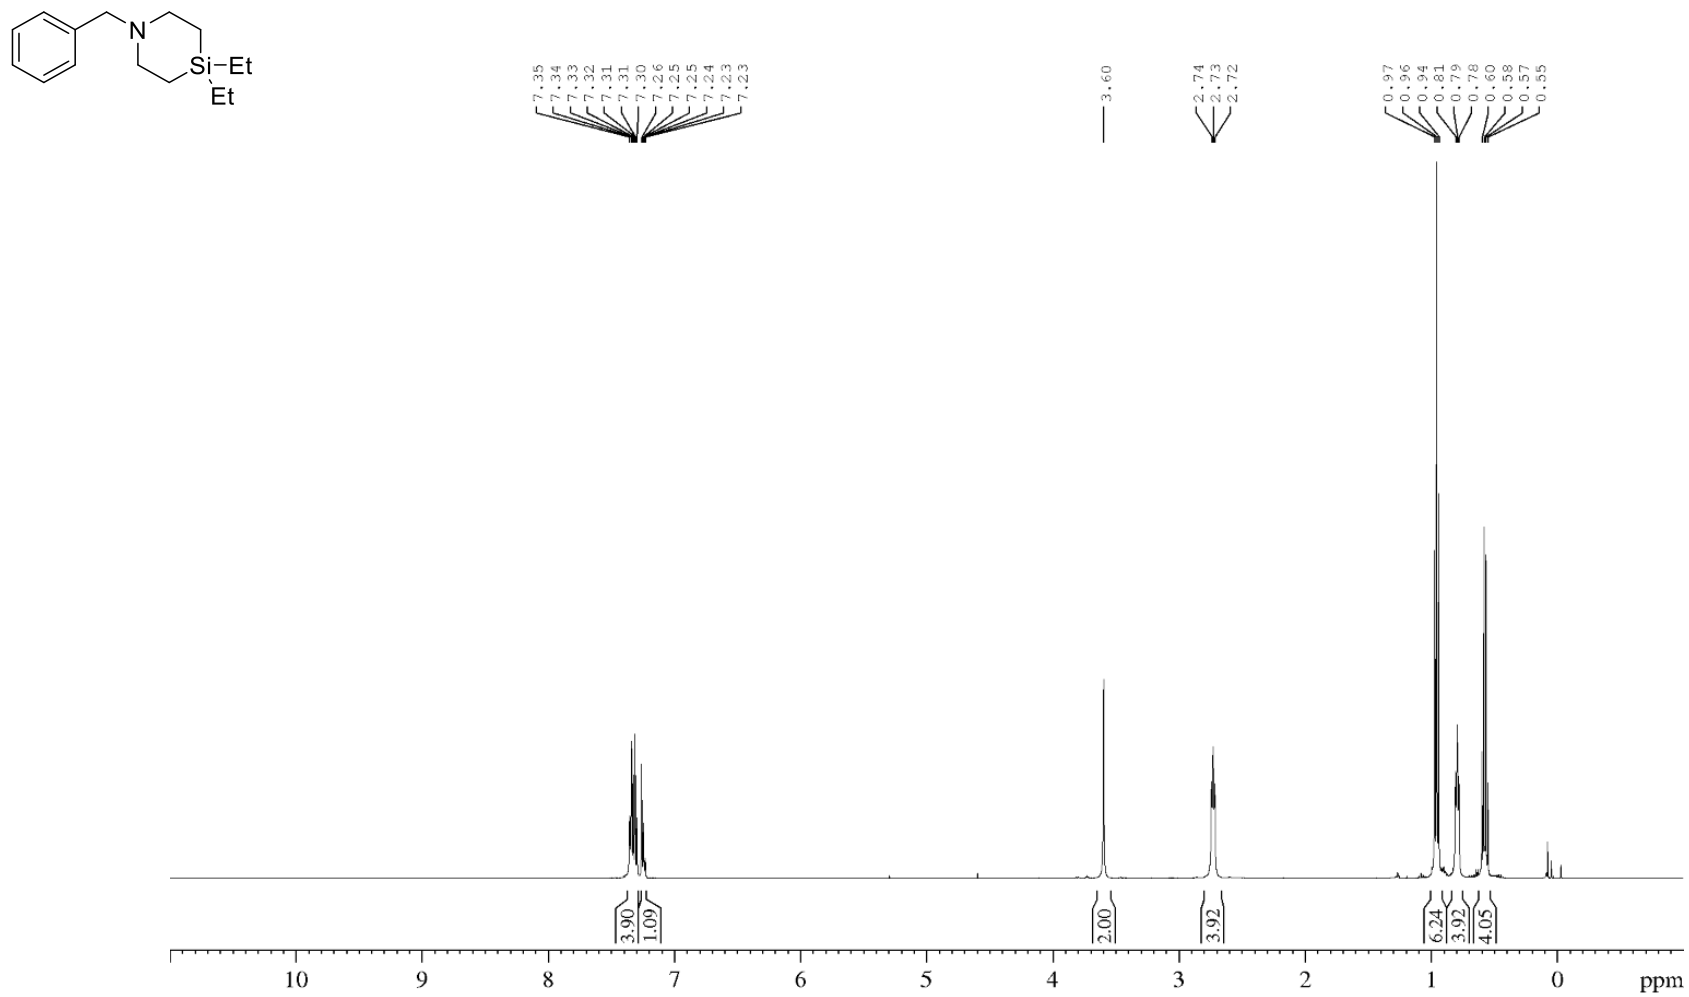

**Figure S90.**  $^{13}\text{C}$  NMR spectrum (125 MHz,  $\text{CDCl}_3$ , 298 K) of **1-benzyl-4,4-diethyl-1,4-azasilinane (3ai)**.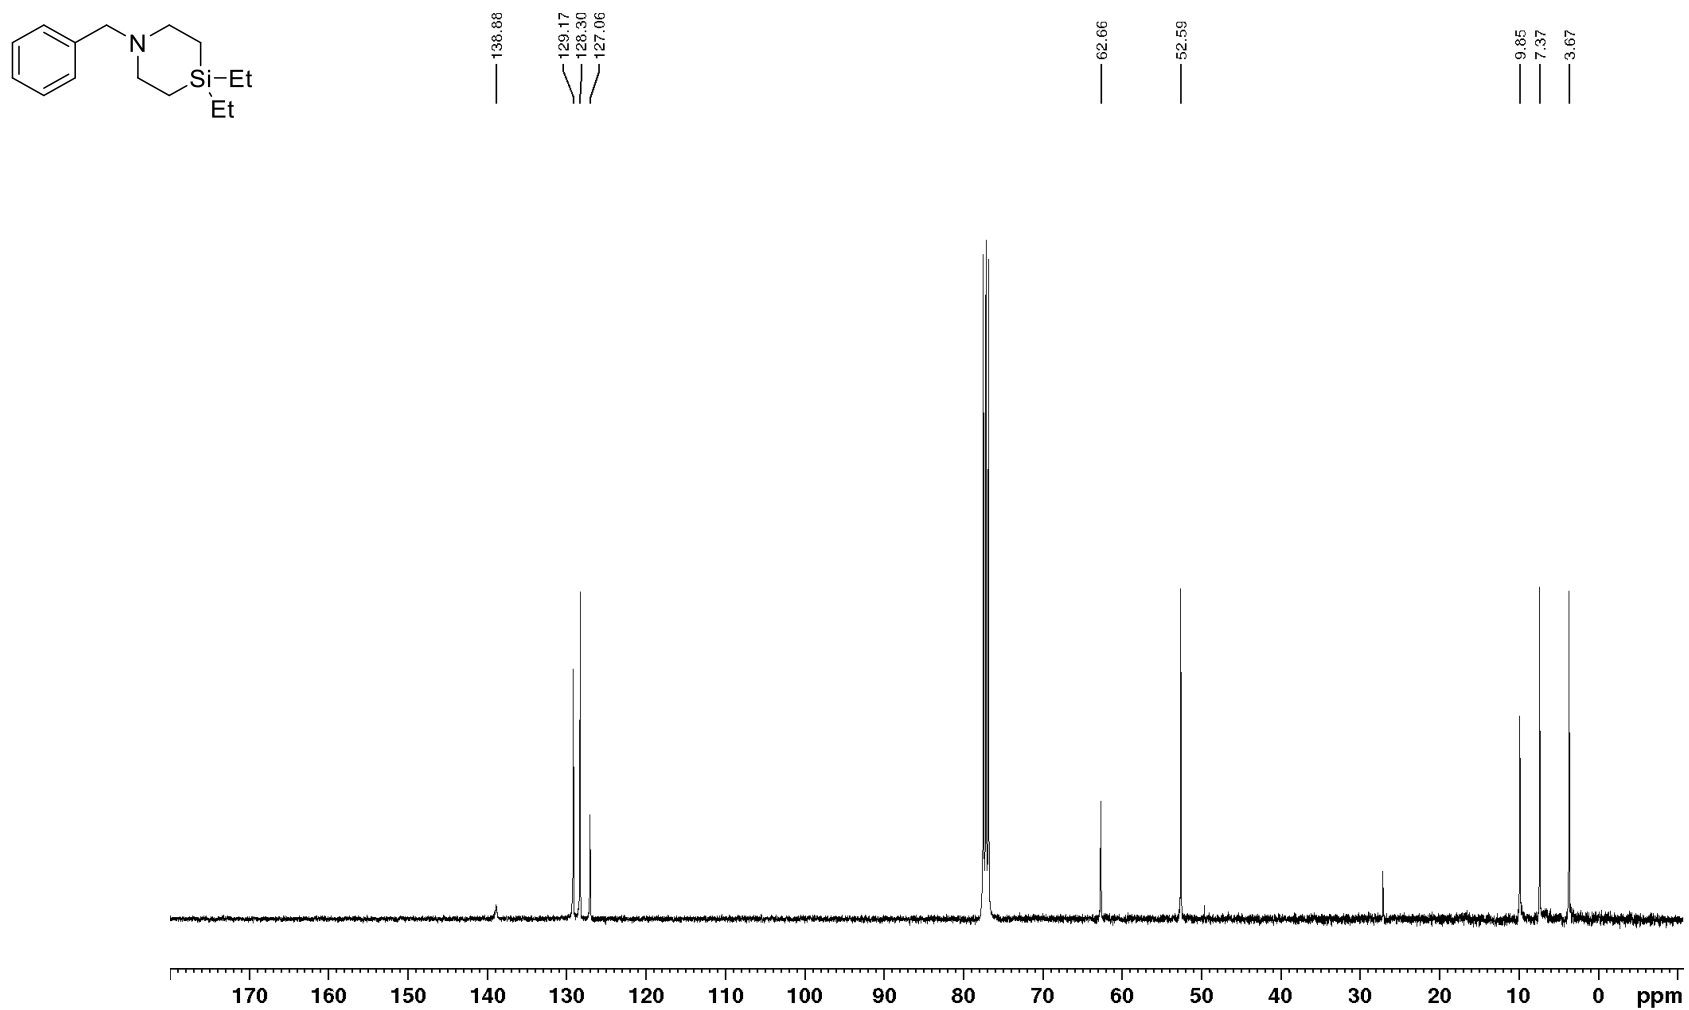



**Figure S91.**  $^1\text{H}/^{29}\text{Si}$  HMQC NMR (500/99 MHz,  $\text{CDCl}_3$ , 298 K, optimized for  $J = 7$  Hz) of **1-benzyl-4,4-diethyl-1,4-azasilinane (3ai)**.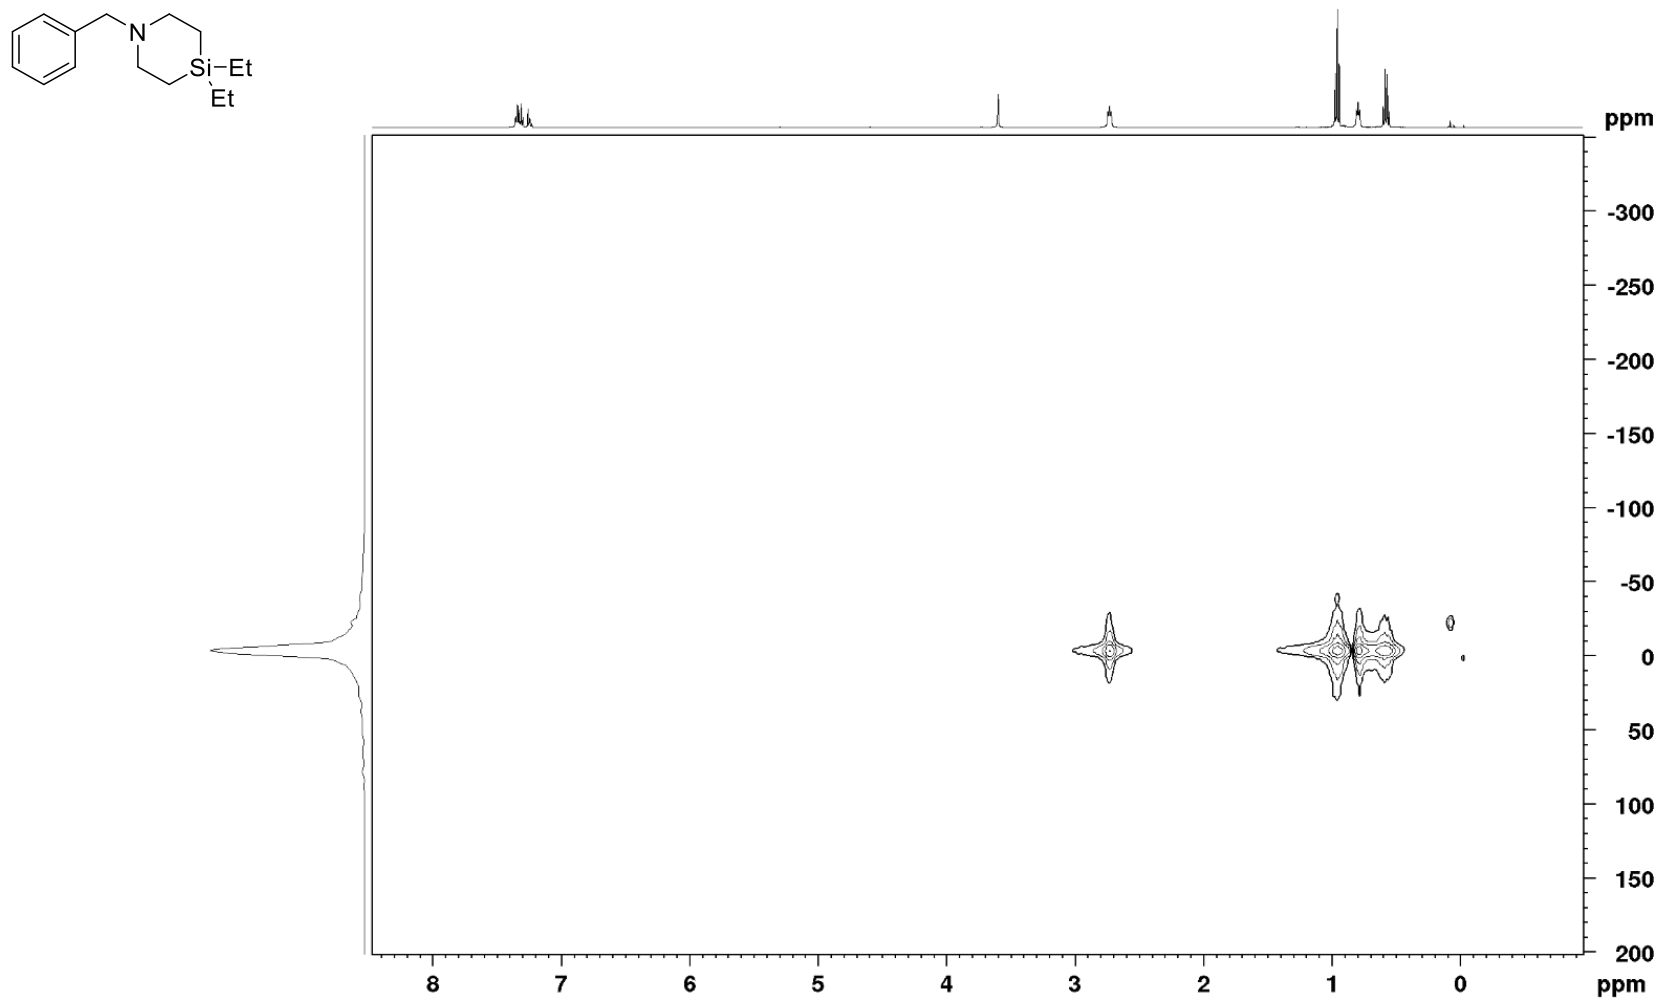

**Figure S92.**  $^1\text{H}$  NMR spectrum (500 MHz,  $\text{CDCl}_3$ , 298 K) of **4,4-diphenyl-1,4-azasilinane hydrochloride (6)**.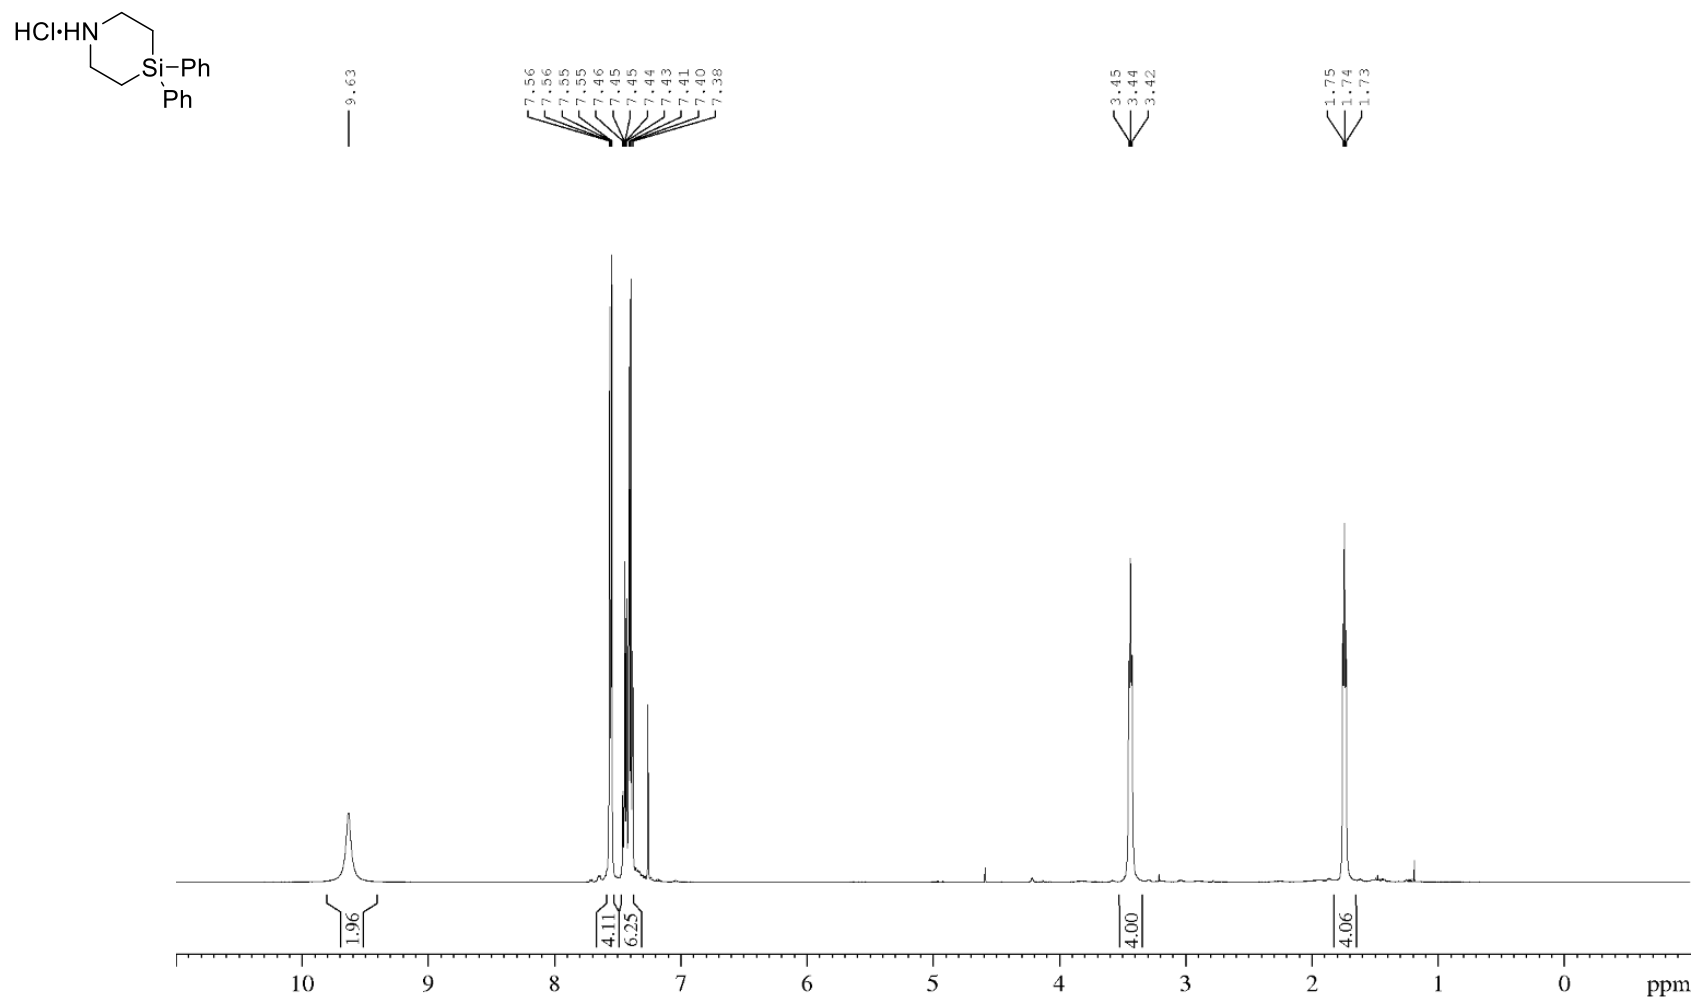

**Figure S93.**  $^{13}\text{C}$  NMR spectrum (125 MHz,  $\text{CDCl}_3$ , 298 K) of **4,4-diphenyl-1,4-azasilinane hydrochloride (6)**.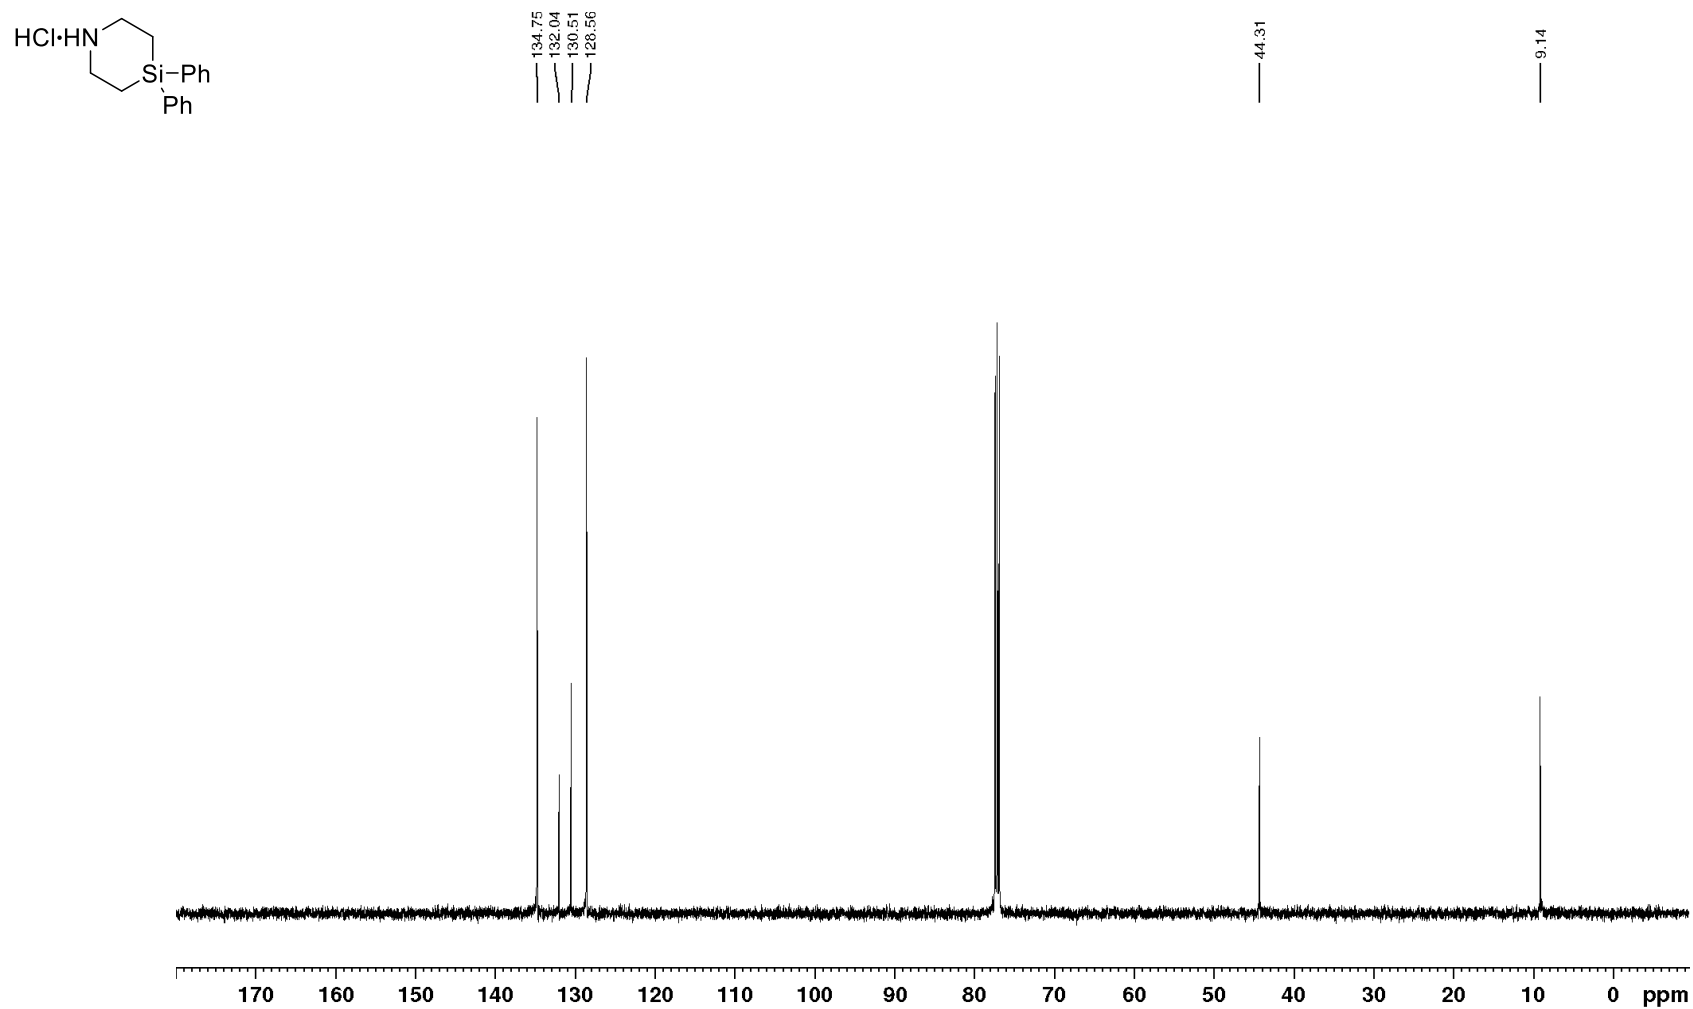

**Figure S94.**  $^1\text{H}/^{29}\text{Si}$  HMQC NMR (500/99 MHz,  $\text{CDCl}_3$ , 298 K, optimized for  $J = 7$  Hz) of **4,4-diphenyl-1,4-azasilinane hydrochloride (6)**.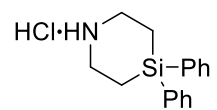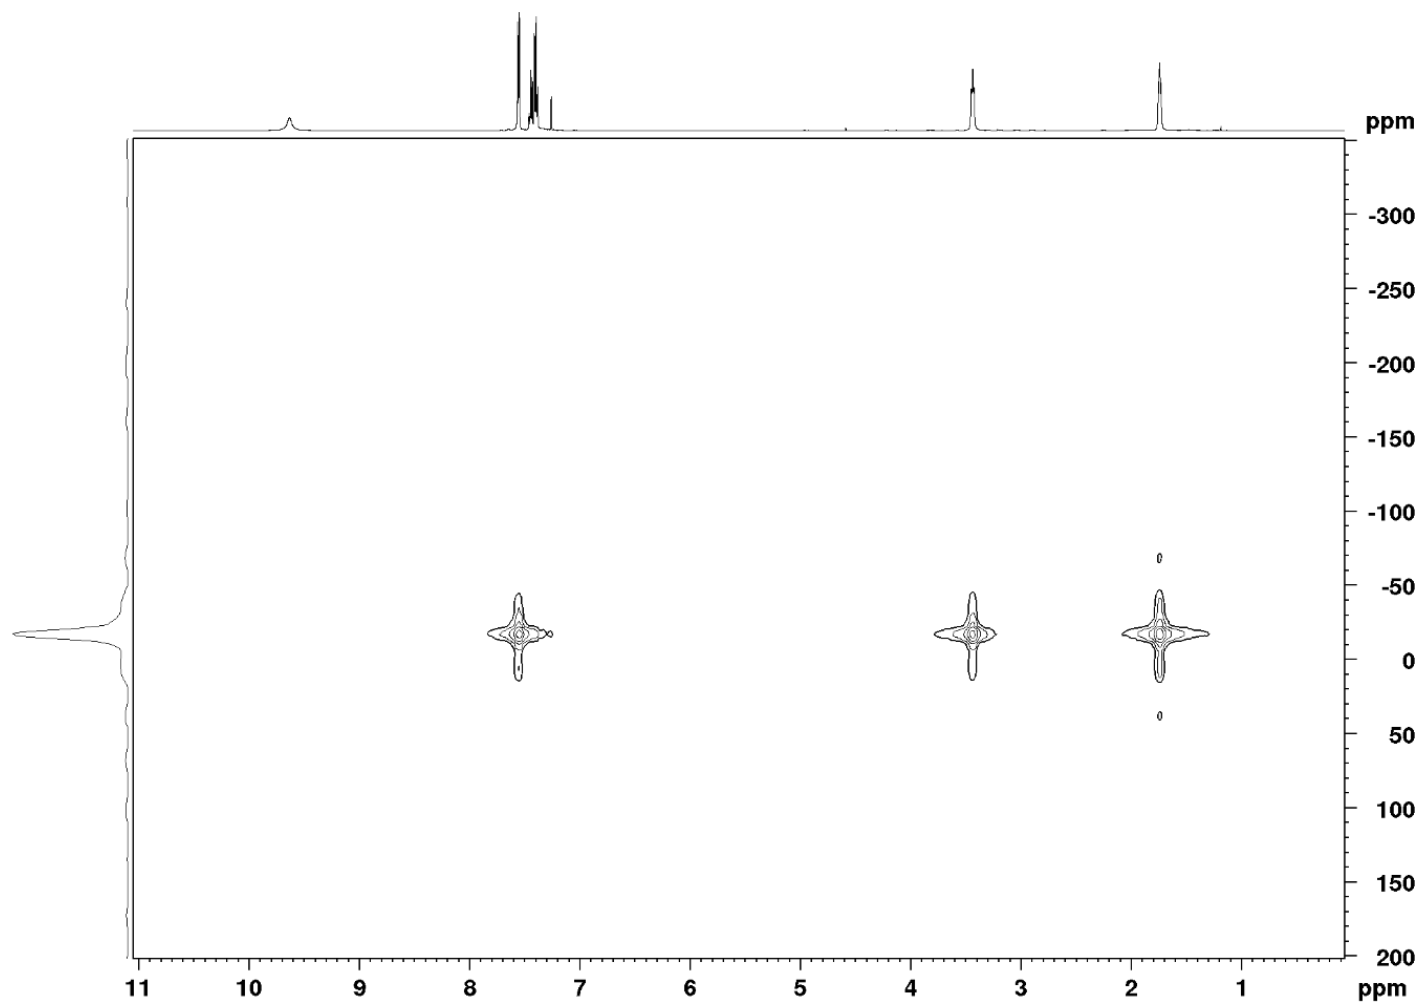

**Figure S95.**  $^1\text{H}$  NMR spectrum (500 MHz,  $\text{CDCl}_3$ , 298 K) of **(4,4-diphenyl-1,4-azasilinan-1-yl)(phenyl)methanone (7)**.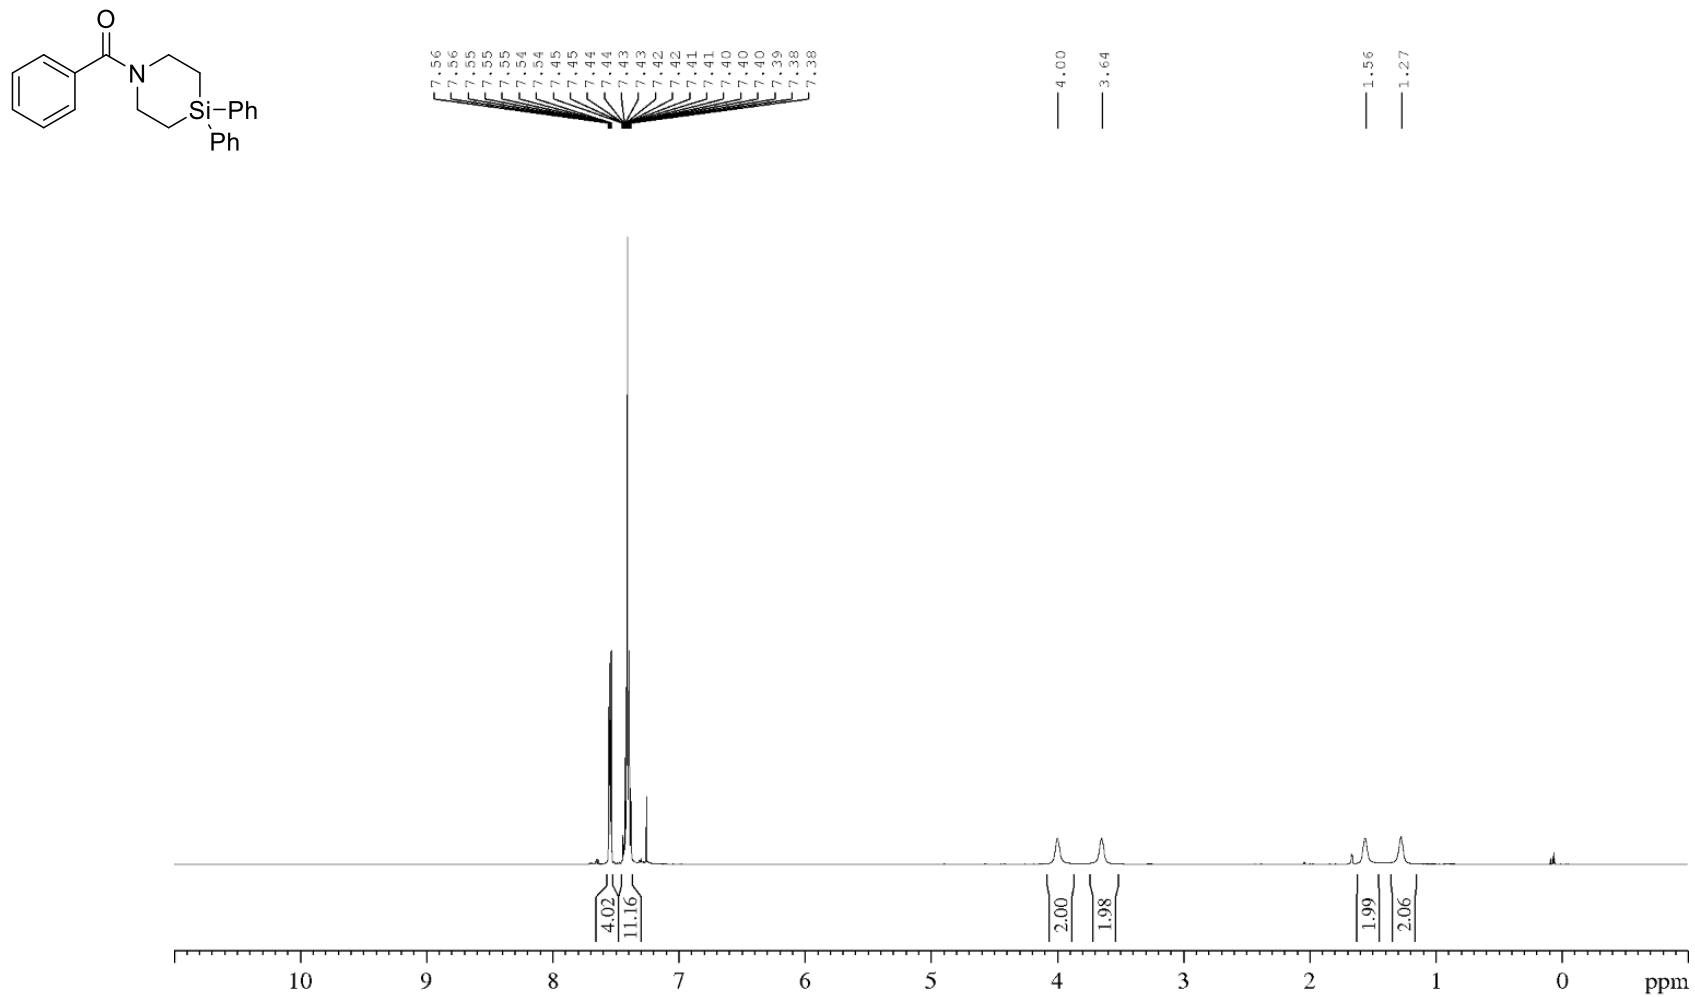

**Figure S96.**  $^{13}\text{C}$  NMR spectrum (125 MHz,  $\text{CDCl}_3$ , 298 K) of (4,4-diphenyl-1,4-azasilinan-1-yl)(phenyl)methanone (7).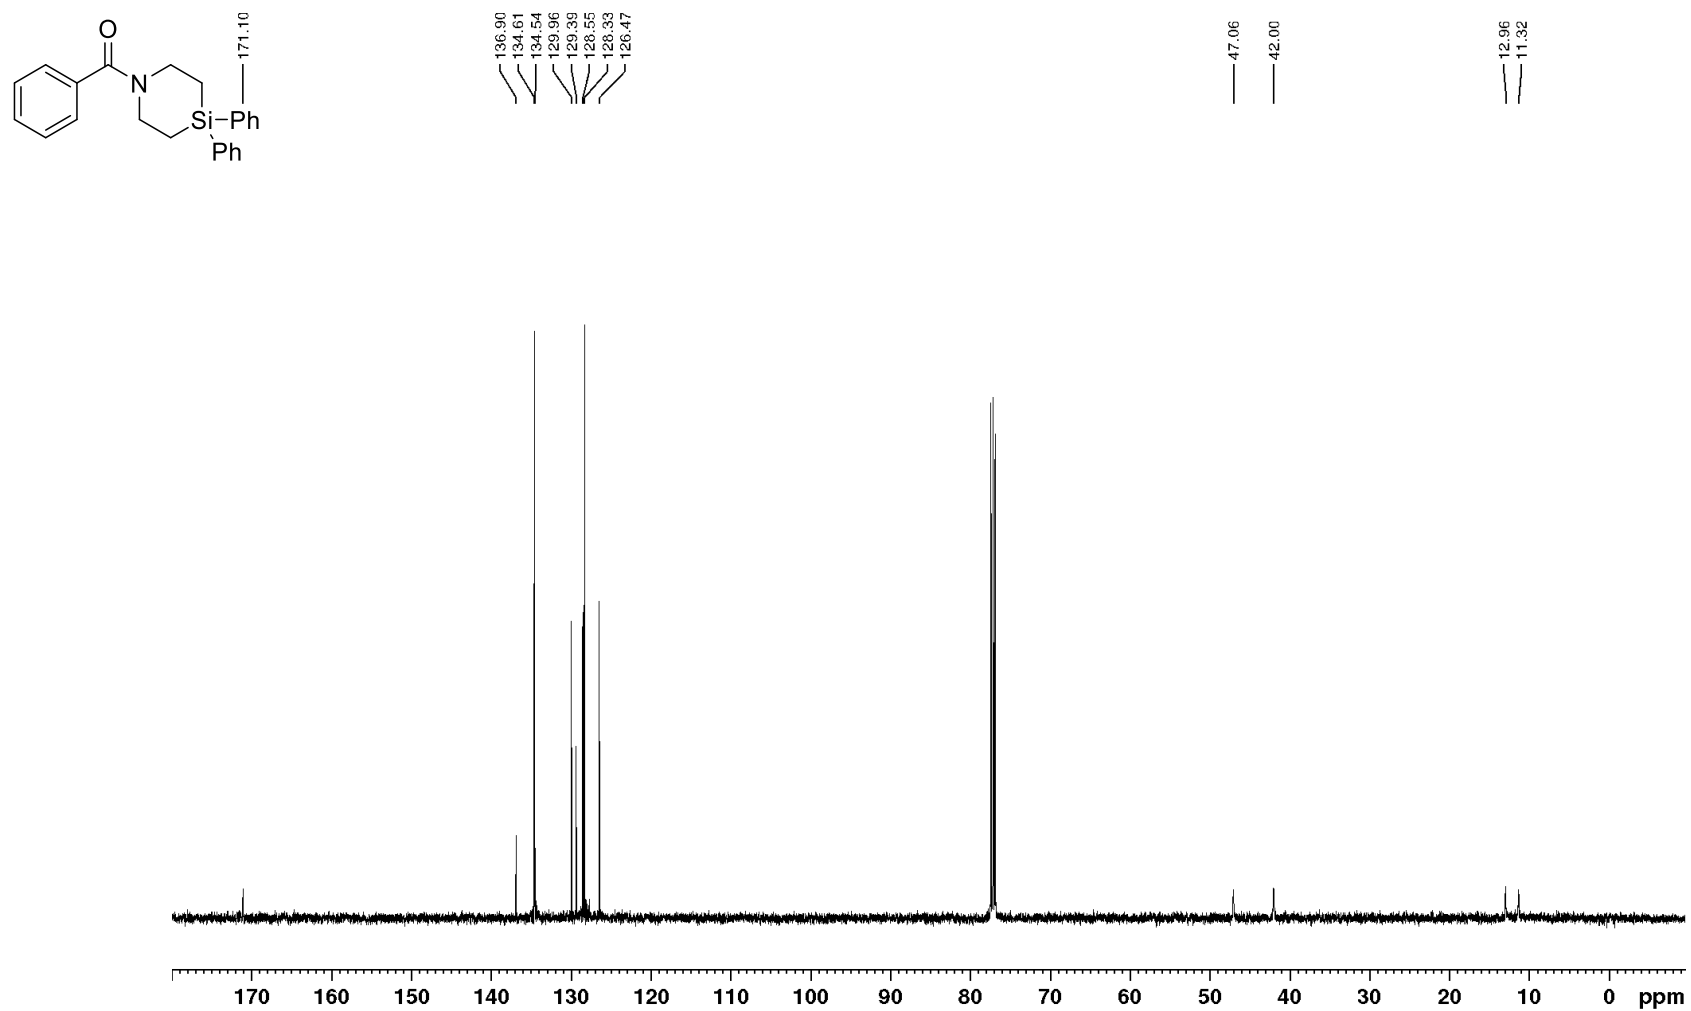

**Figure S97**  $^1\text{H}/^{29}\text{Si}$  HMQC NMR (500/99 MHz,  $\text{CDCl}_3$ , 298 K, optimized for  $J = 7$  Hz) of **(4,4-diphenyl-1,4-azasilinan-1-yl)(phenyl)methanone**

(7).

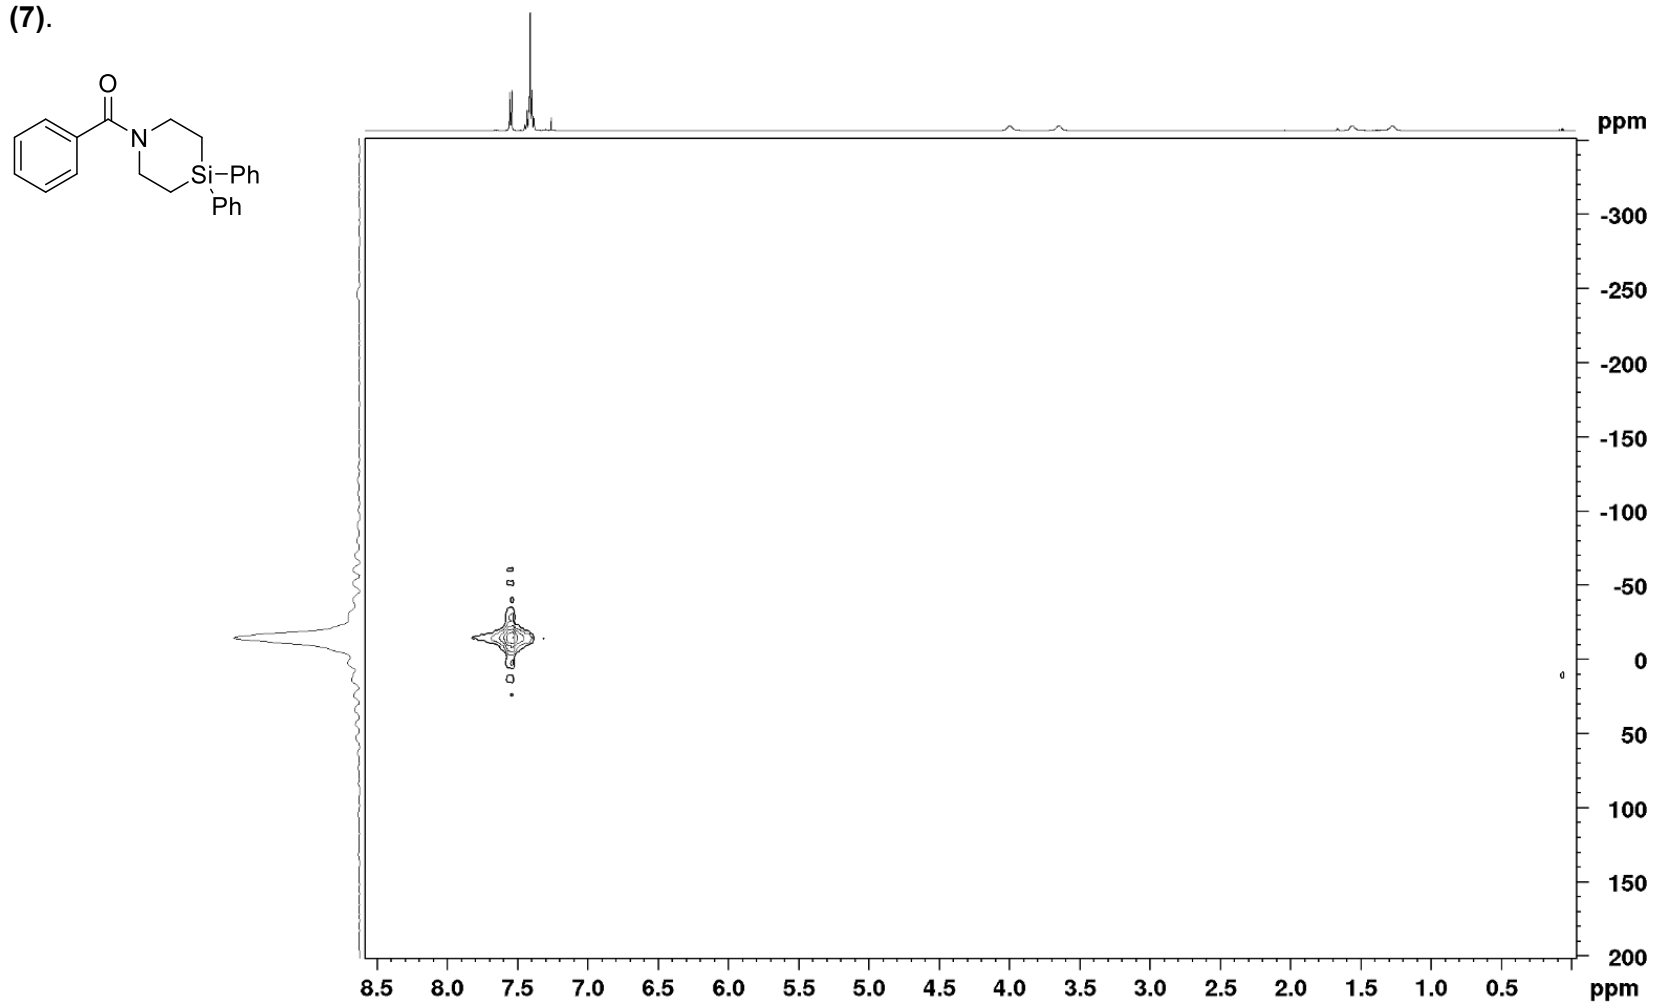

**Figure S98.**  $^1\text{H}$  NMR spectrum (500 MHz,  $\text{CDCl}_3$ , 298 K) of **4,4-diphenyl-1-(phenylmethyl-d)-1,4-azasilinane-2,6- $d_2$  (3aa- $d_3$ ).**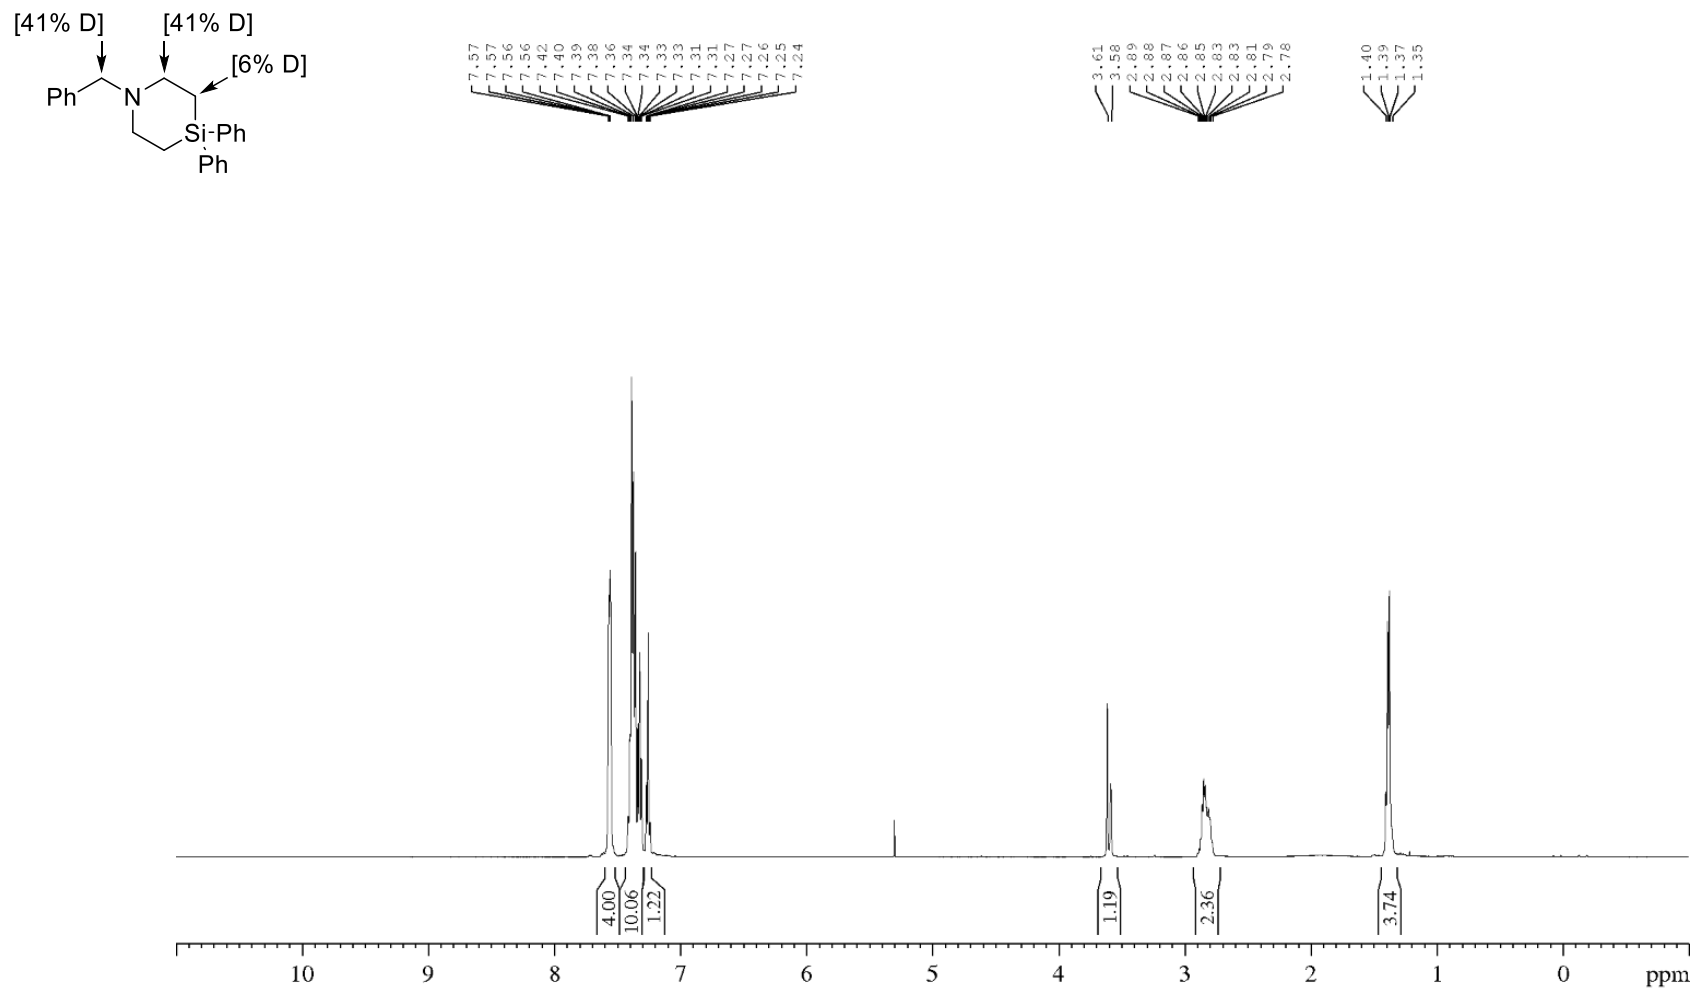



**Figure S99.**  $^{13}\text{C}$  NMR spectrum (125 MHz,  $\text{CDCl}_3$ , 298 K) of **4,4-diphenyl-1-(phenylmethyl-d)-1,4-azasilinane-2,6- $d_2$  (3aa- $d_3$ ).**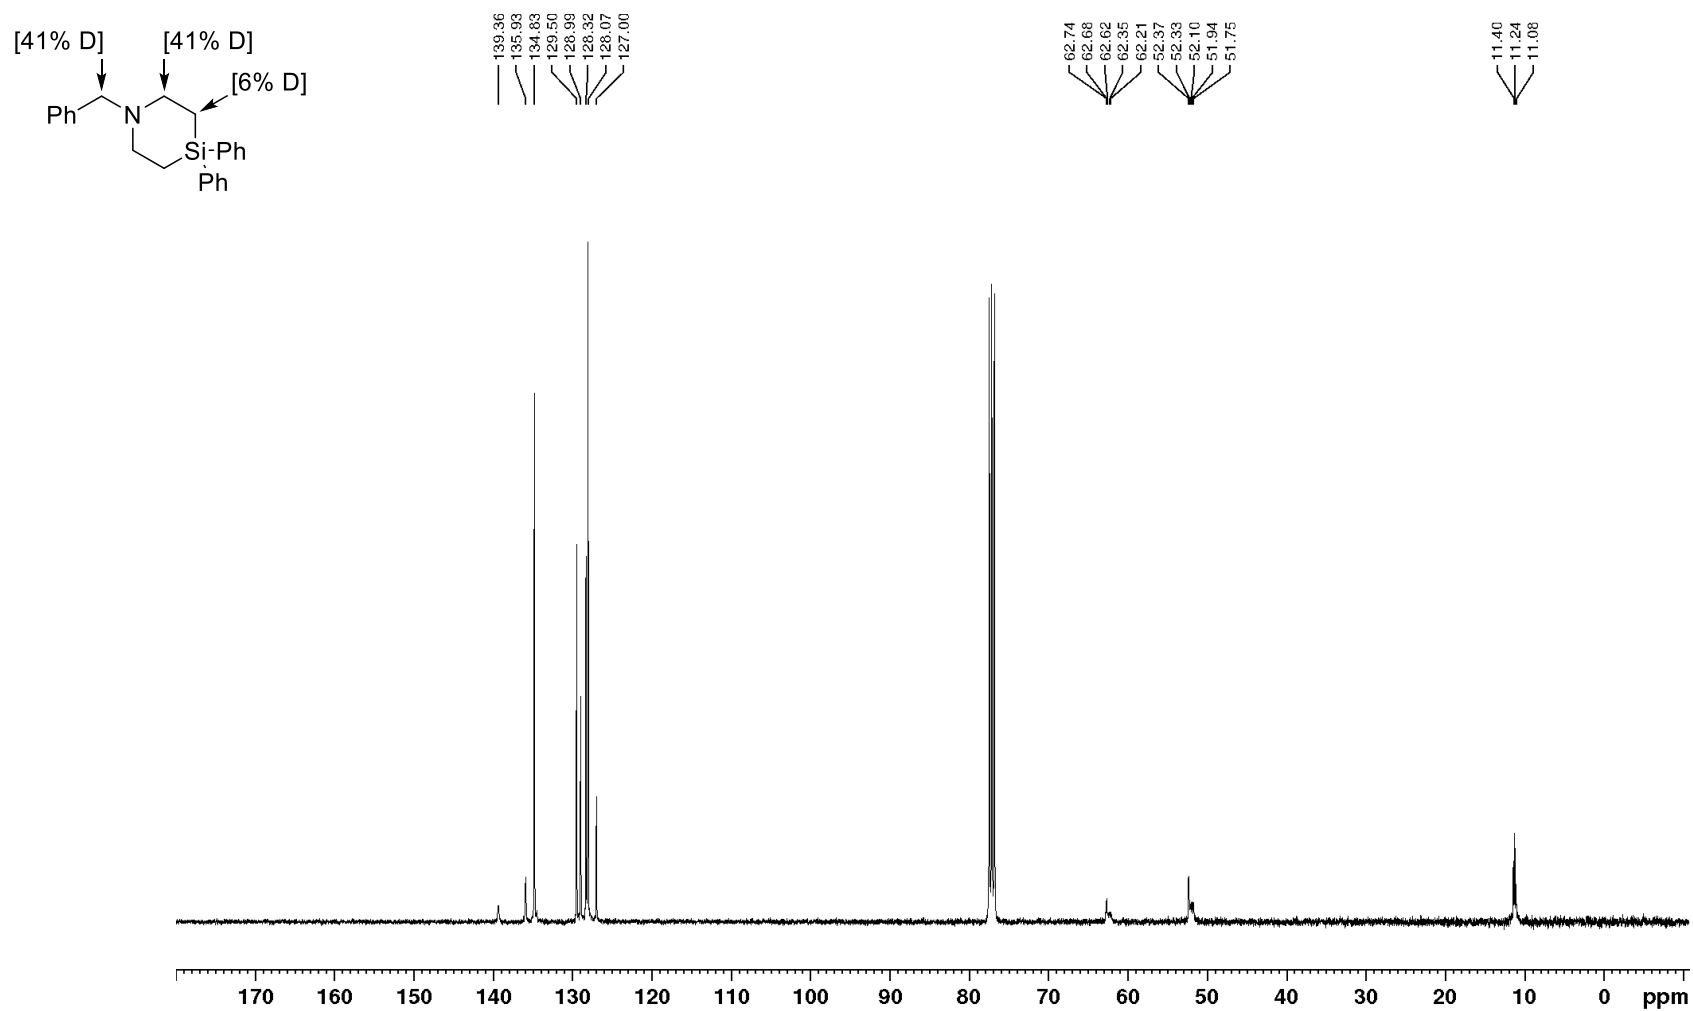

**Figure S100.**  $^1\text{H}/^{29}\text{Si}$  HMQC NMR (500/99 MHz,  $\text{CDCl}_3$ , 298 K, optimized for  $J = 7$  Hz) of **4,4-diphenyl-1-(phenylmethyl-d)-1,4-azasilinane-2,6-d<sub>2</sub> (3aa-d<sub>3</sub>)**.

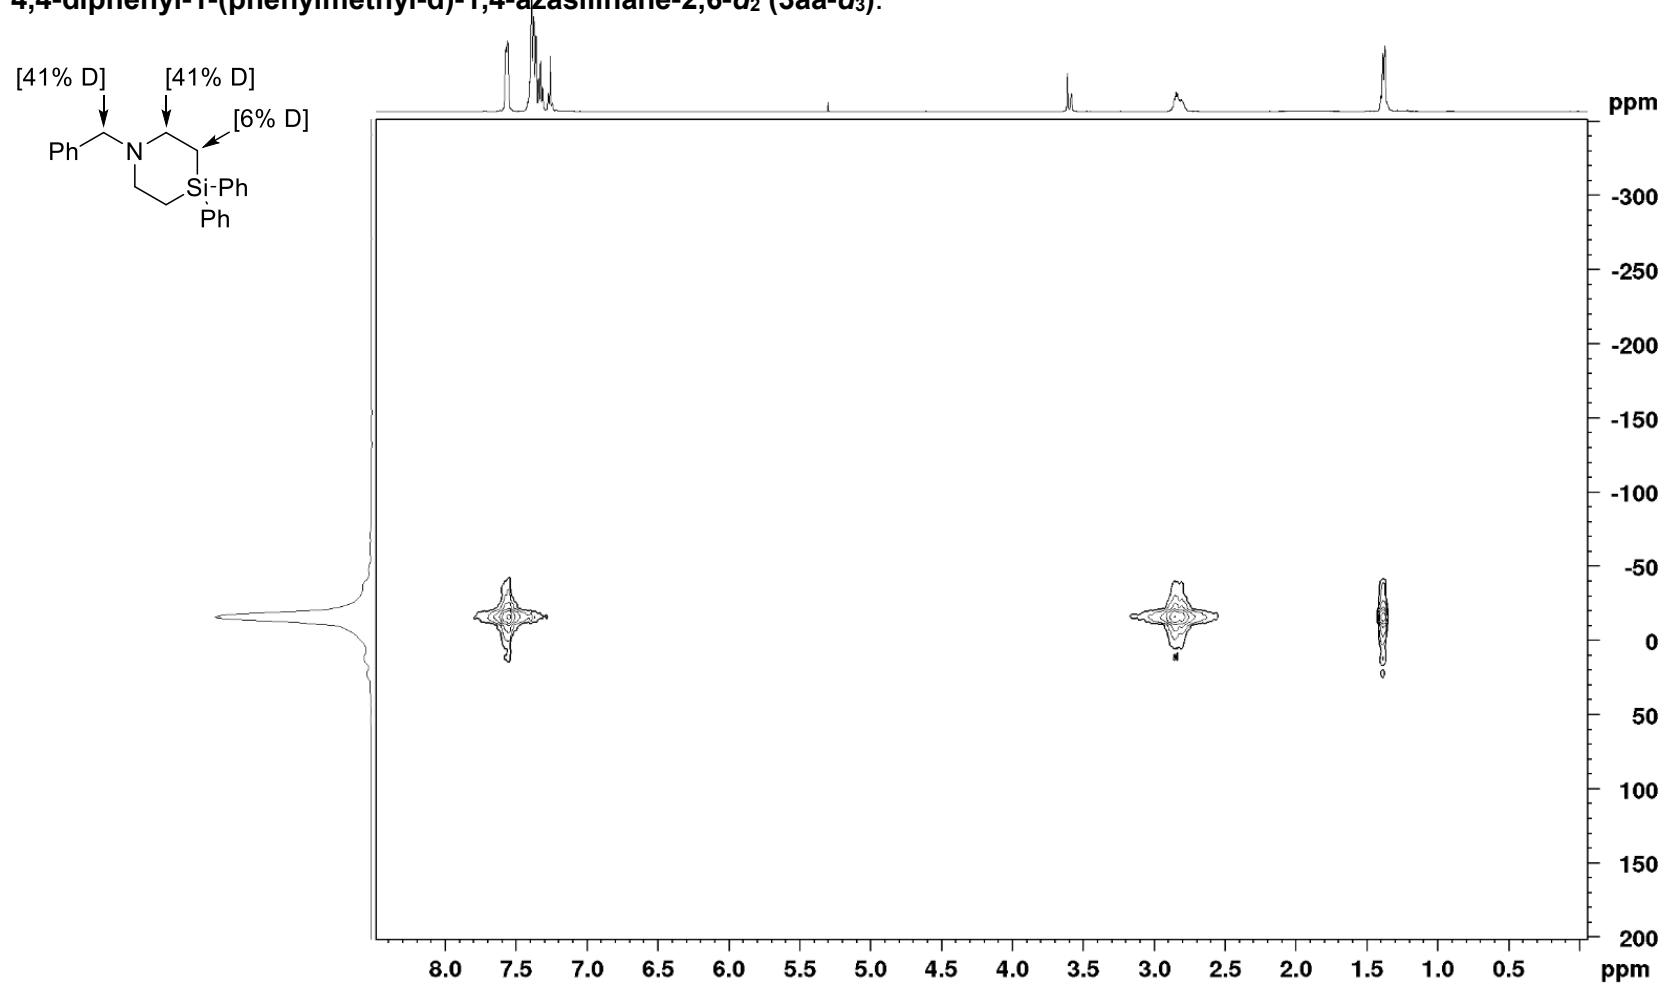

**Figure S101.**  $^1\text{H}$  NMR spectrum (500 MHz,  $\text{CDCl}_3$ , 298 K) of *N*-benzyl-*N*-butylbutan-1-amine- $d_3$  (**1v-d<sub>3</sub>**).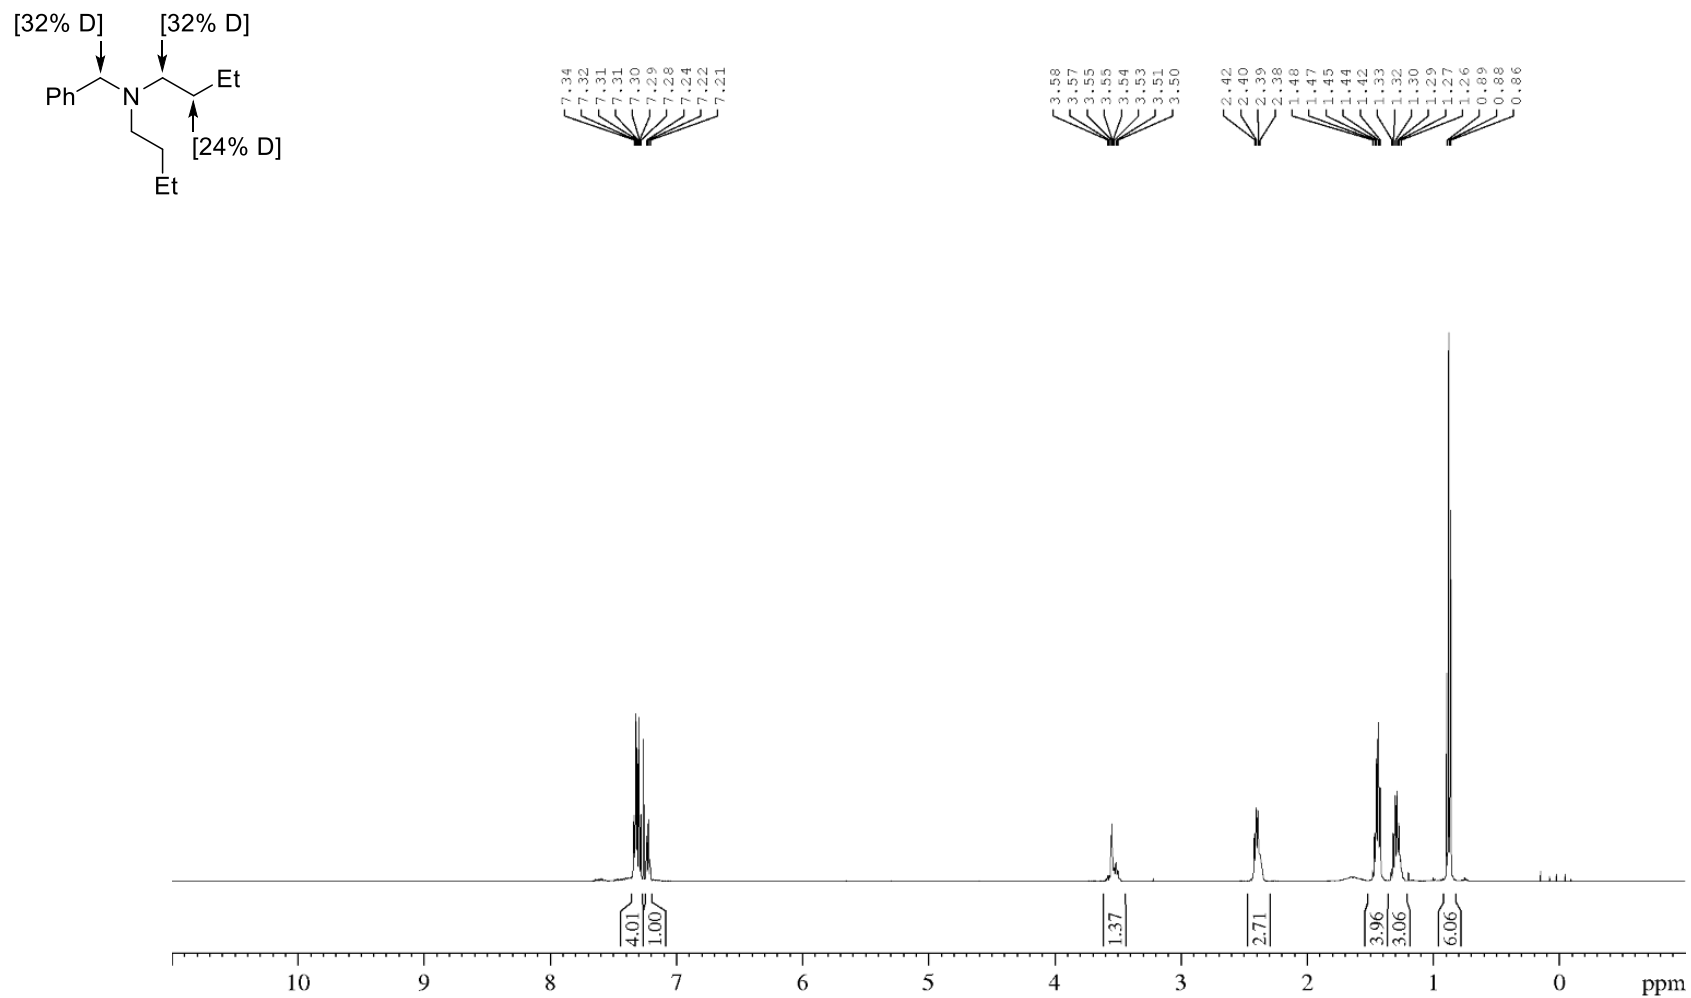

**Figure S102.**  $^{13}\text{C}$  NMR spectrum (125 MHz,  $\text{CDCl}_3$ , 298 K) of *N*-benzyl-*N*-butylbutan-1-amine- $d_3$  (**1v-d<sub>3</sub>**).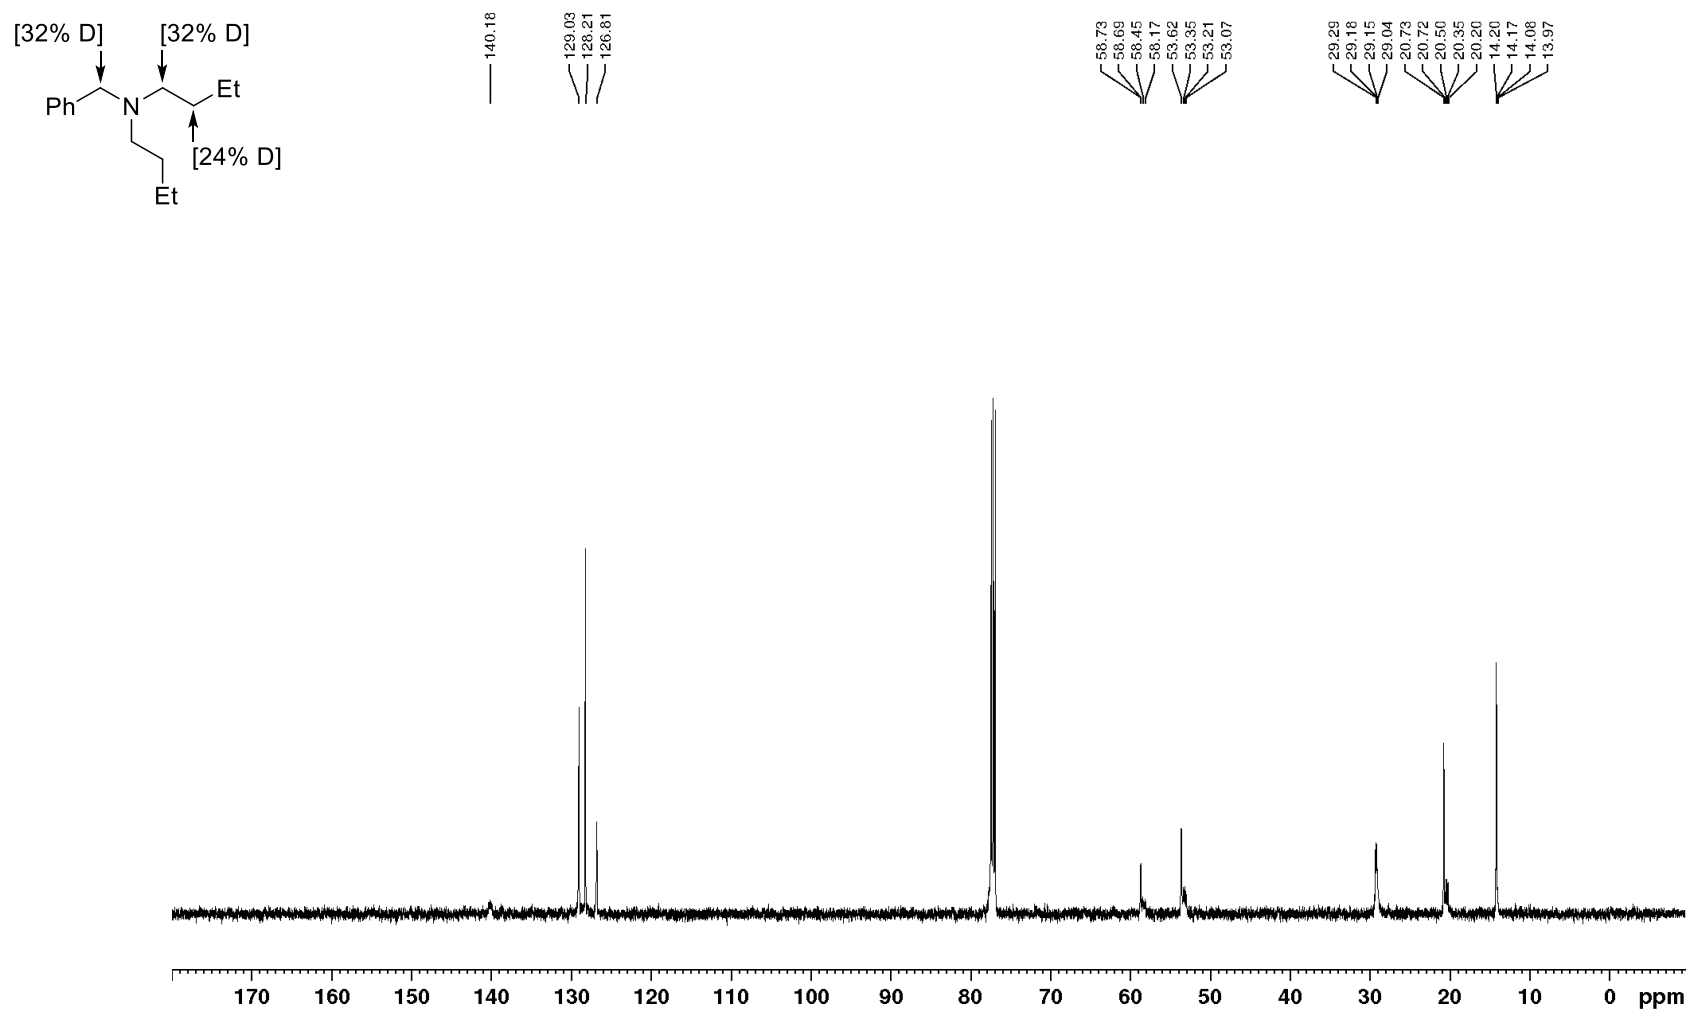

**Figure S103.**  $^1\text{H}$  NMR spectrum (500 MHz,  $\text{CDCl}_3$ , 298 K) of the stoichiometric reaction of **1a** and  $\text{B}(\text{C}_6\text{F}_5)_3$  (1:1).

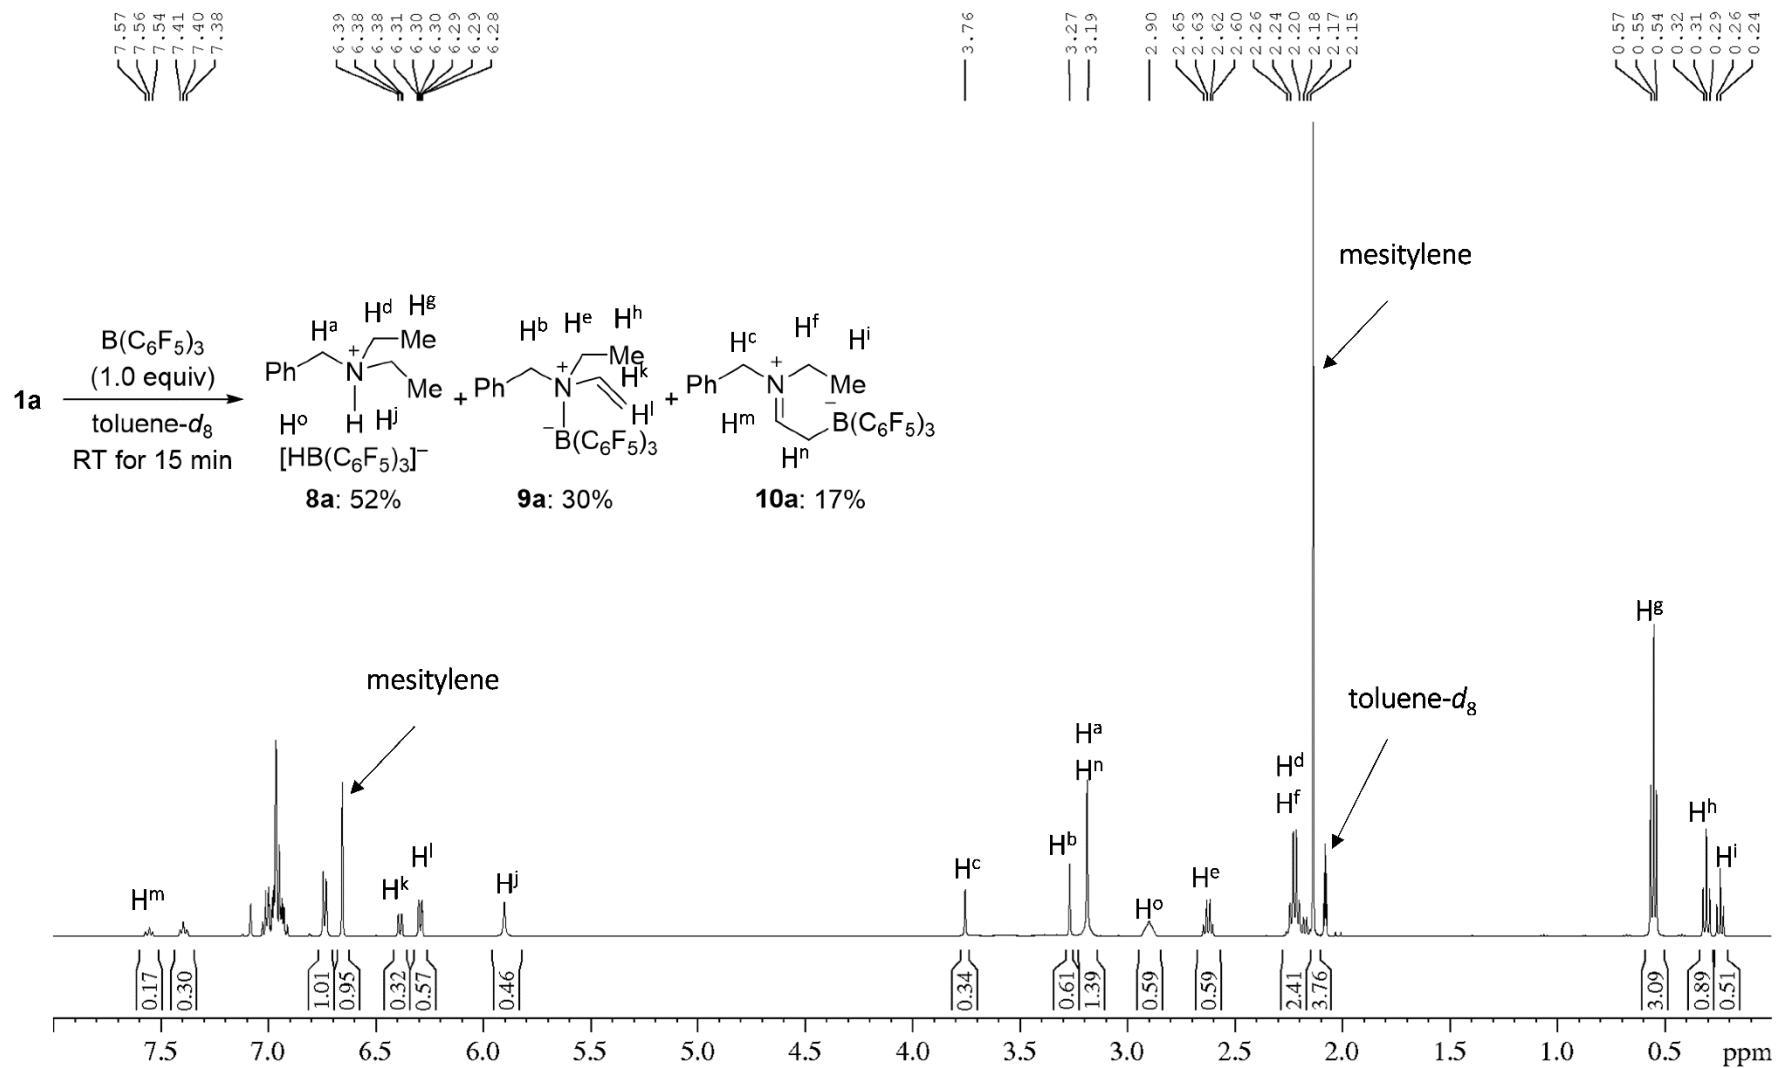

**Figure S104.**  $^{11}\text{B}$  NMR spectrum (161 MHz,  $1,2\text{-C}_6\text{D}_4\text{Cl}_2$ , 298 K) of the stoichiometric reaction of **1a** and  $\text{B}(\text{C}_6\text{F}_5)_3$  (1:1).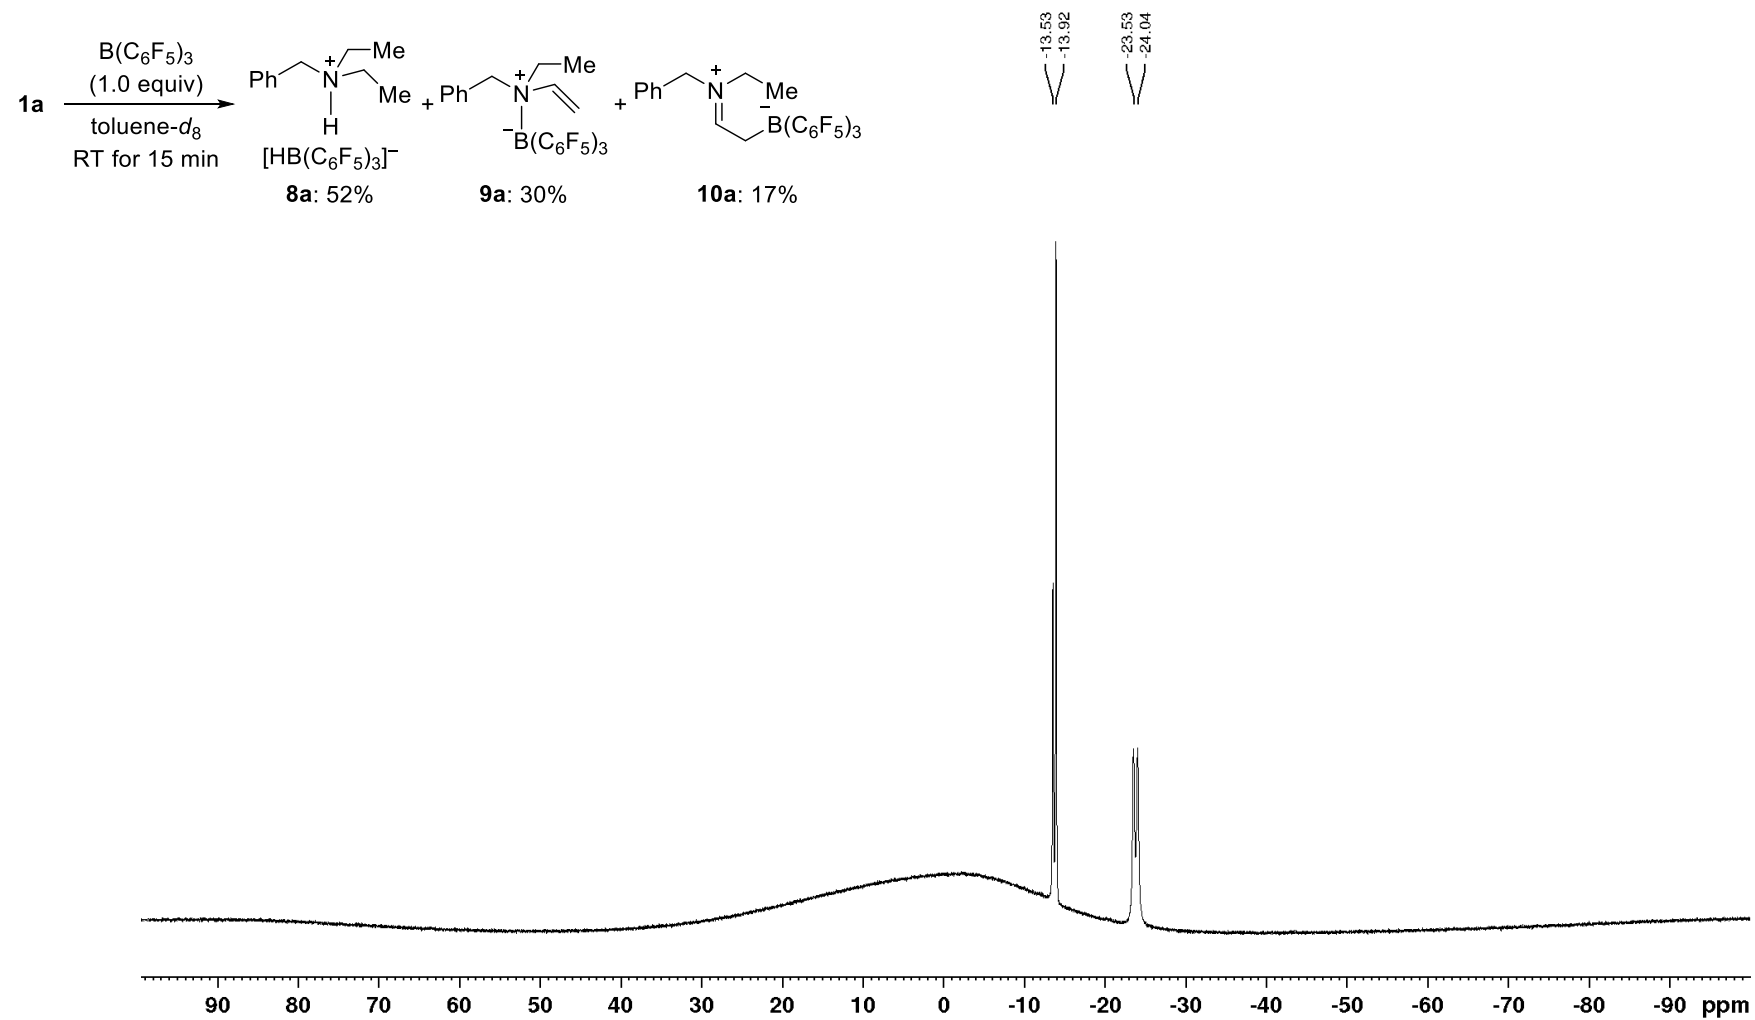

**Figure S105.**  $^{19}\text{F}$  NMR spectrum (471 MHz,  $1,2\text{-C}_6\text{D}_4\text{Cl}_2$ , 298 K) of the stoichiometric reaction of **1a** and  $\text{B}(\text{C}_6\text{F}_5)_3$  (1:1).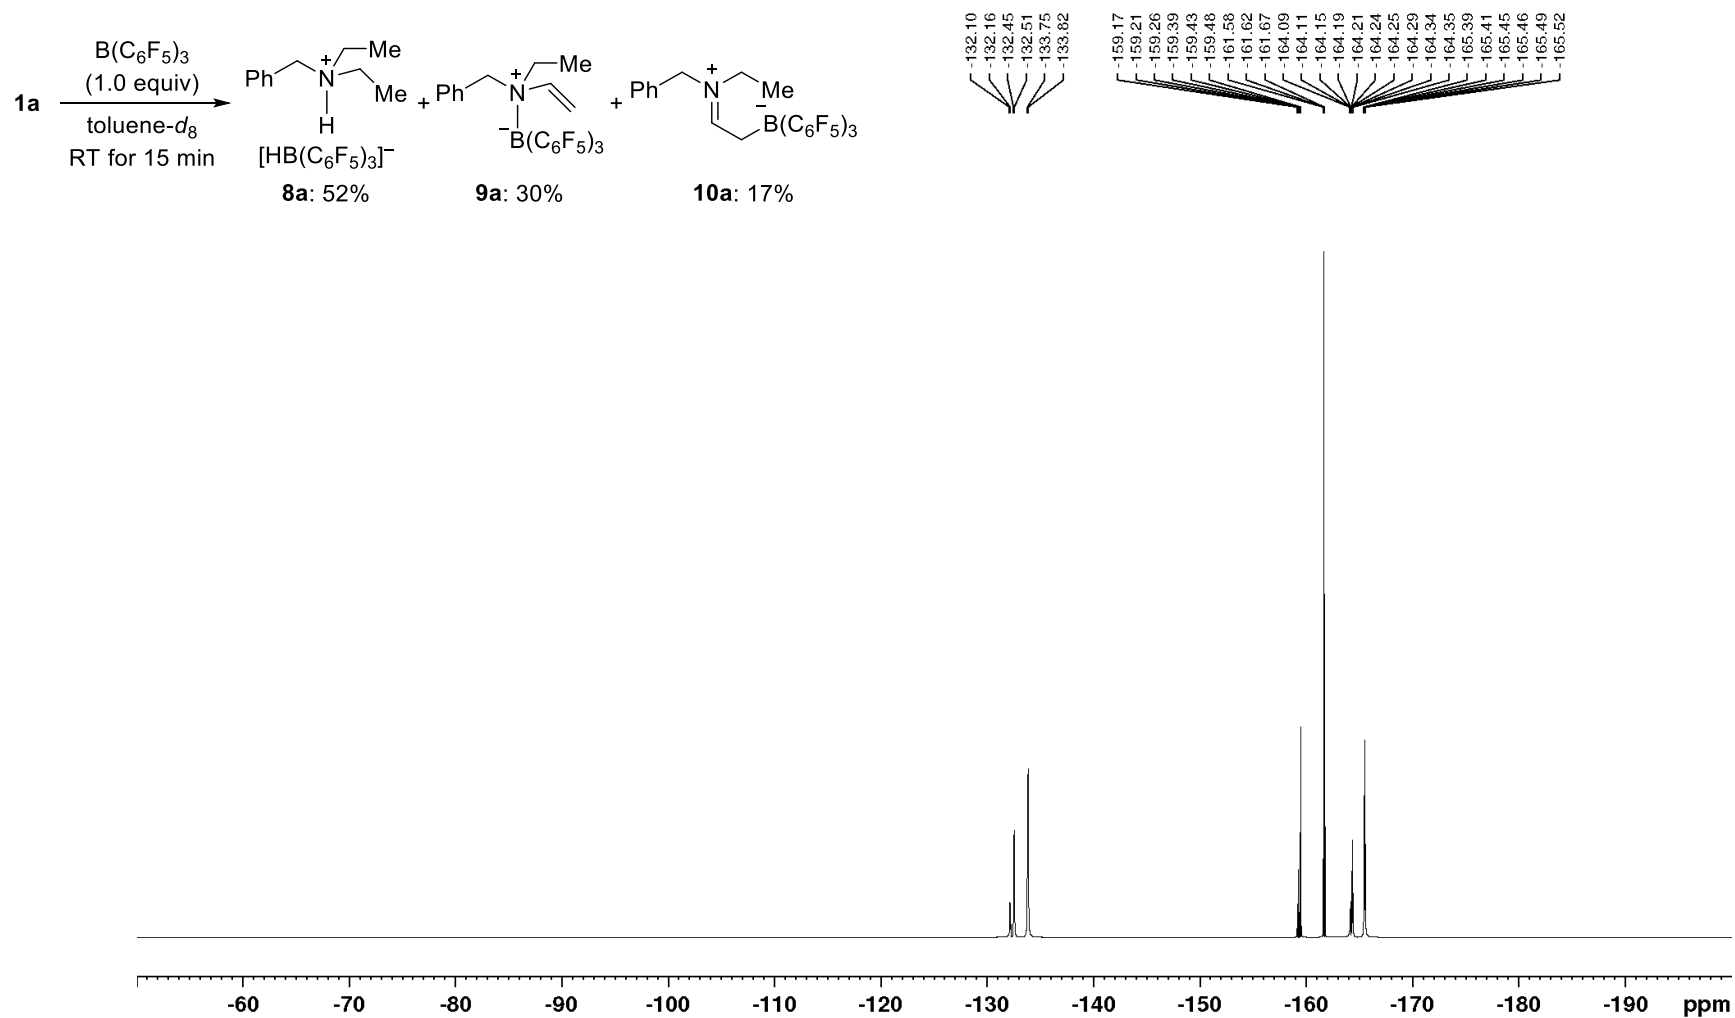

**Figure S106.**  $^1\text{H}$  NMR spectrum (500 MHz,  $\text{CDCl}_3$ , 298 K) of the stoichiometric reaction of **1a**,  $\text{Me}_3\text{SiOTf}$ , and  $\text{B}(\text{C}_6\text{F}_5)_3$  (1:1:1).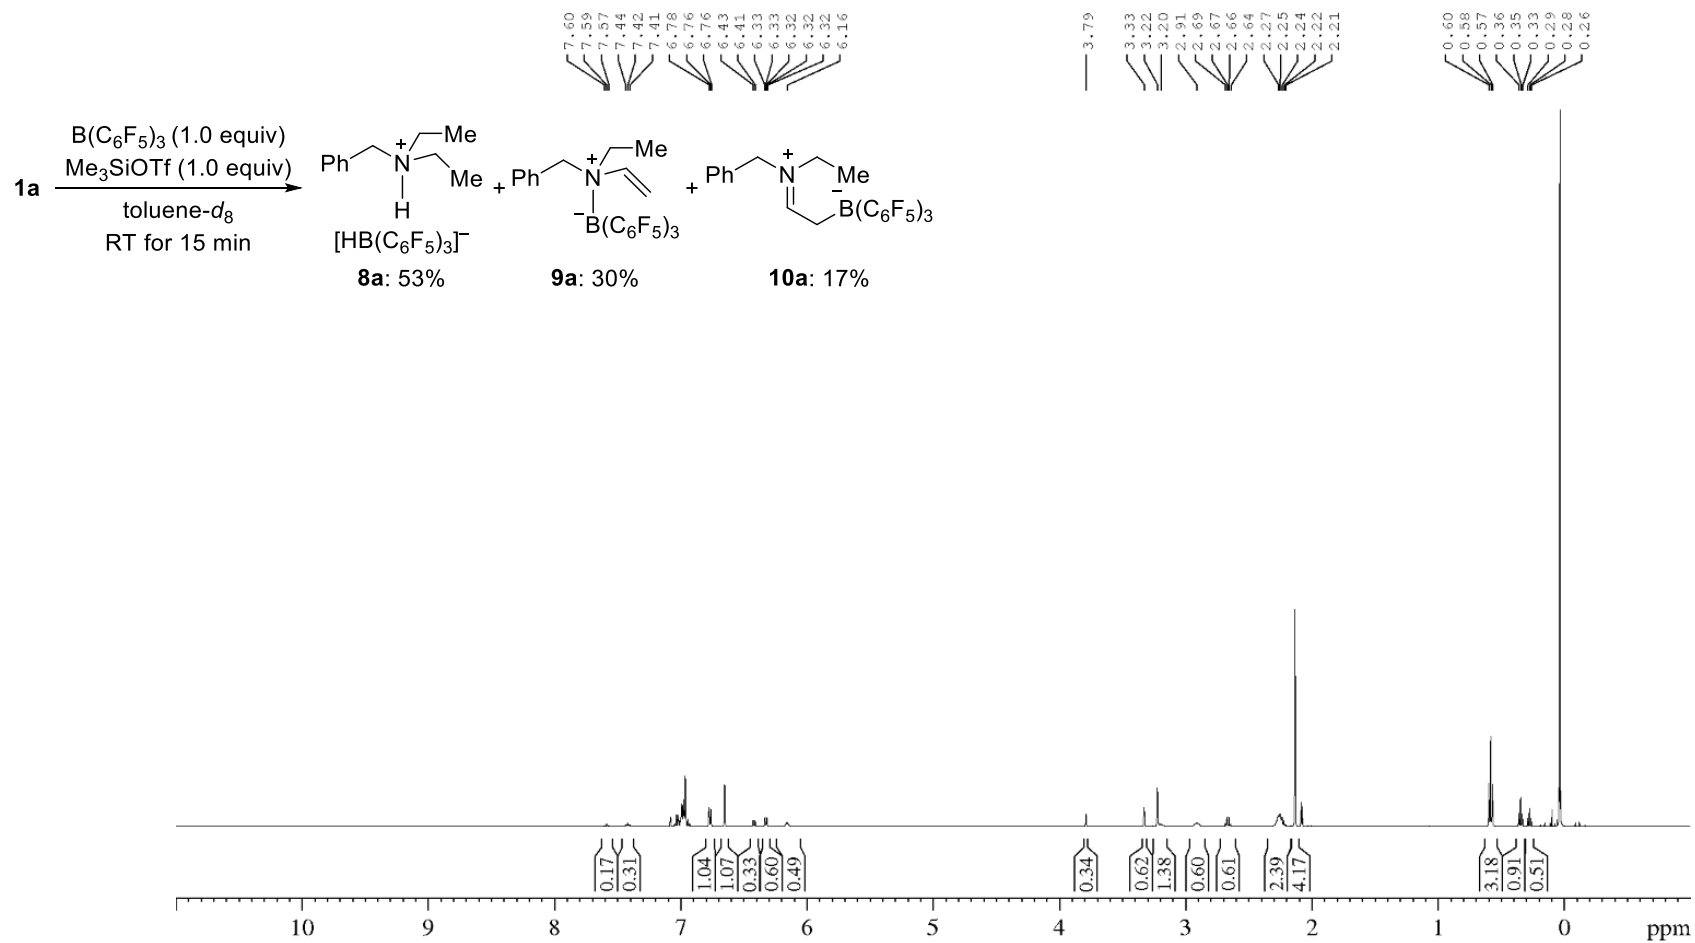



**Figure S107.**  $^{11}\text{B}$  NMR spectrum (161 MHz,  $1,2\text{-C}_6\text{D}_4\text{Cl}_2$ , 298 K) of the stoichiometric reaction of **1a**,  $\text{Me}_3\text{SiOTf}$ , and  $\text{B}(\text{C}_6\text{F}_5)_3$  (1:1:1).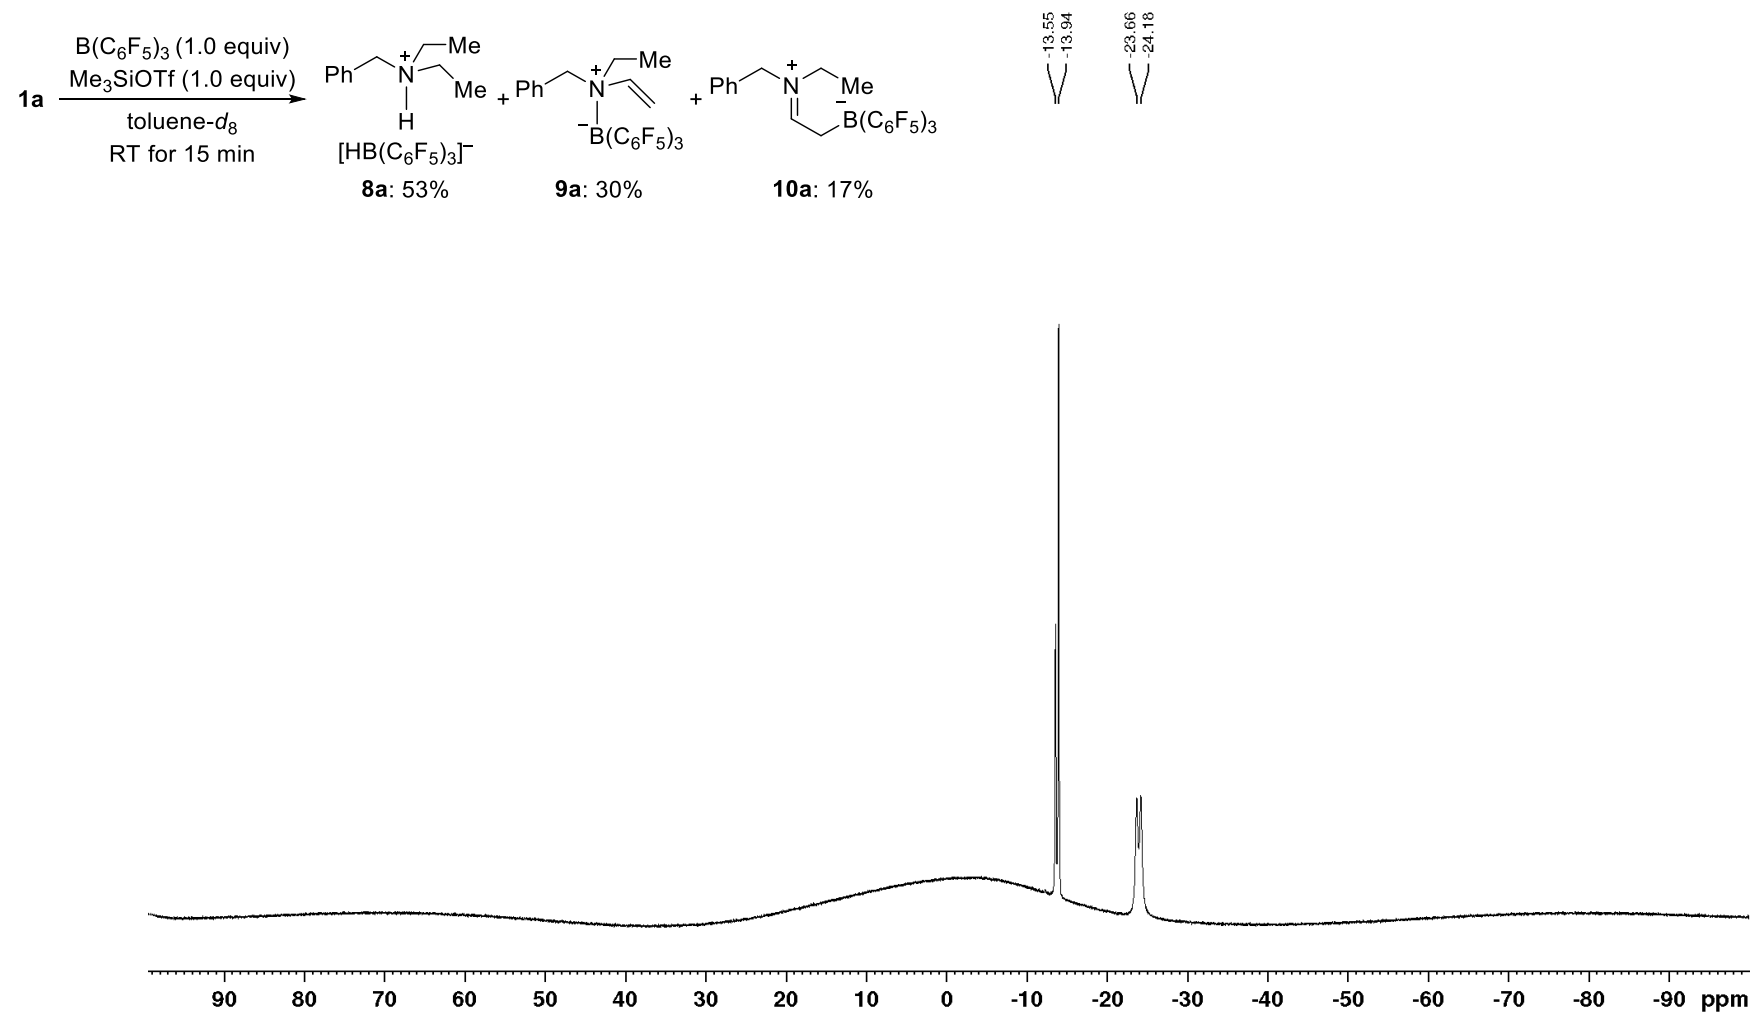

**Figure S108.**  $^{19}\text{F}$  NMR spectrum (471 MHz,  $1,2\text{-C}_6\text{D}_4\text{Cl}_2$ , 298 K) of the stoichiometric reaction of **1a**,  $\text{Me}_3\text{SiOTf}$ , and  $\text{B}(\text{C}_6\text{F}_5)_3$  (1:1:1).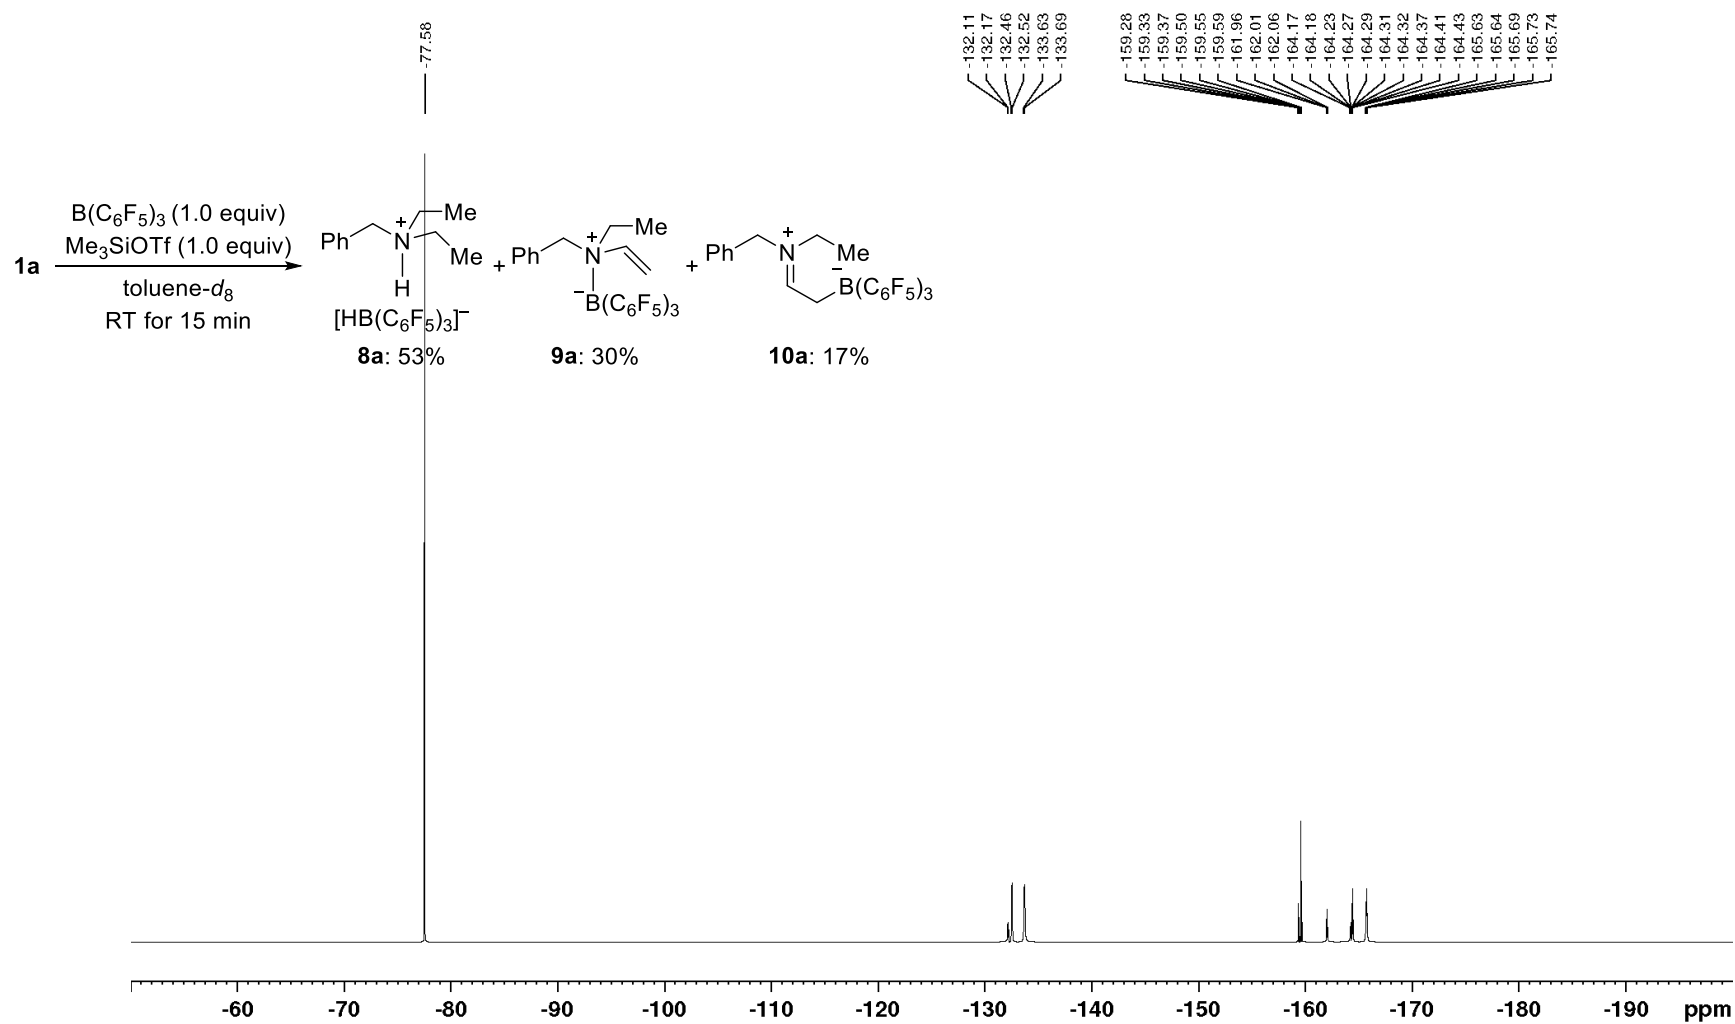

## 8 References

- [1] P. D. Prince, M. J. Bearpark, G. S. McGrady, J. W. Steed, *Dalton Trans.* **2008**, 271–282.
- [2] X. Yang, C. Wang, *Angew. Chem. Int. Ed.* **2018**, *57*, 923–928; *Angew. Chem.* **2018**, *130*, 935–940.
- [3] a) S. J. Aspin, S. Taillemaud, P. Cyr, A. B. Charette, *Angew. Chem. Int. Ed.* **2016**, *55*, 13833–13837; *Angew. Chem.* **2016**, *128*, 14037–14041; b) G. Zhan, H.-L. Teng, Y. Luo, S.-J. Lou, M. Nishiura, Z. Hou, *Angew. Chem. Int. Ed.* **2018**, *57*, 12342–12346; *Angew. Chem.* **2018**, *130*, 12522–12526.
- [4] N. T. Tran, T. Min, A. K. Franz, *Chem. Eur. J.* **2011**, *17*, 9897–9900.
- [5] N. Gandhamsetty, S. Park, S. Chang, *J. Am. Chem. Soc.* **2015**, *137*, 15176–15184.
- [6] S. E. Varjosaari, V. Skrypai, P. Suating, J. J. M. Hurley, A. M. D. Lio, T. M. Gilbert, M. J. Adler, *Adv. Synth. Catal.* **2017**, *359*, 1872–1878.
- [7] S. R. Tamang, A. Singh, D. Bedi, A. R. Bazkiaei, A. A. Warner, K. Glogau, C. McDonald, D. K. Unruh, M. Findlater, *Nat. Catal.* **2020**, *3*, 154–162.
- [8] W. Yao, H. Fang, Q. He, D. Peng, G. Liu, Z. Huang, *J. Org. Chem.* **2019**, *84*, 6084–6093.
- [9] C. Li, K.-f. Wan, F.-y. Guo, Q.-h. Wu, M.-l. Yuan, R.-x. Li, H.-y. Fu, X.-l. Zheng, H. Chen, *J. Org. Chem.* **2019**, *84*, 2158–2168.
- [10] H. Seo, M. H. Katcher, T. F. Jamison, *Nat. Chem.* **2017**, *9*, 453–456.
- [11] a) R. Tacke, R. Bertermann, C. Burschka, S. Dörrich, M. Fischer, B. Müller, G. Meyerhans, D. Schepmann, B. Wünsch, I. Arnason, R. Bjornsson, *ChemMedChem* **2012**, *7*, 523–532; b) B. Seetharamsingh, R. Ramesh, S. S. Dange, P. V. Khairnar, S. Singhal, D. Upadhyay, S. Veeraraghavan, S. Viswanadha, S. Vakkalanka, D. S. Reddy, *Acs Med. Chem. Lett.* **2015**, *6*, 1105–1110.
- [12] M. Fischer, R. Tacke, *Organometallics* **2013**, *32*, 7181–7185.
- [13] D. S. Reddy, R. Ramesh, S. S. Balamkundu, PCT Int. Appl., WO2014097322A1.
